# Supplementary material for: A comparative approach for species delimitation based on multiple methods of multi-locus DNA sequence analysis: A case study of the genus Giraffa (Mammalia, Cetartiodactyla)
Source: PubMed Central journal article supplement (PMC7018015; doi:10.1371/journal.pone.0217956), 2020-02-13
Supplement: pone.0217956.s001.pdf [file pone.0217956.s001.pdf]

## S1 Appendix. Classifications of *Giraffa*

### A comparative approach for species delimitation based on multiple methods of multi-locus DNA sequence analysis: a case study of the genus *Giraffa* (Mammalia, Cetartiodactyla)

Alice Petzold<sup>1,2</sup>, Alexandre Hassanin<sup>1,2\*</sup>

1 Institut de Systématique, Évolution, Biodiversité (ISYEB), Sorbonne Université, MNHN, CNRS, EPHE, Paris, France

2 Muséum national d'Histoire naturelle, CP51, 55 rue Buffon - 75005 Paris, France

\*Correspondence: [alexandre.hassanin@mnhn.fr](mailto:alexandre.hassanin@mnhn.fr)

**Table A.** Taxonomic classifications proposed for *Giraffa camelopardalis*

| Year | Author        | Species                                                                | Subspecies (Synonyms)                                                                                                                                                                                                                                                                                                                                                                     |
|------|---------------|------------------------------------------------------------------------|-------------------------------------------------------------------------------------------------------------------------------------------------------------------------------------------------------------------------------------------------------------------------------------------------------------------------------------------------------------------------------------------|
| 1758 | Linnaeus      | <i>Cervus camelopardalis</i>                                           | -                                                                                                                                                                                                                                                                                                                                                                                         |
| 1762 | Brisson       | <i>Giraffa camelopardalis</i>                                          | -                                                                                                                                                                                                                                                                                                                                                                                         |
| 1827 | Saint-Hilaire | (1) "Girafe du nord"<br>(2) "Girafe du Cap"                            | -                                                                                                                                                                                                                                                                                                                                                                                         |
| 1899 | De Winton     | <i>Giraffa camelopardalis</i>                                          | <i>G. c. camelopardalis</i><br><i>G. c. reticulata</i>                                                                                                                                                                                                                                                                                                                                    |
| 1901 | Thomas        | (1) <i>Giraffa camelopardalis</i><br>(2) <i>Giraffa reticulata</i>     | (1) <i>G. c. camelopardalis</i><br><i>G. c. peralta</i><br>(2) <i>G. r. reticulata</i>                                                                                                                                                                                                                                                                                                    |
| 1914 | Lydekker      | (1) <i>Giraffa camelopardalis</i><br><br>(2) <i>Giraffa reticulata</i> | (1) <i>G. c. camelopardalis</i><br><i>G. c. angolensis</i><br><i>G. c. antiquorum</i><br><i>G. c. capensis</i><br><i>G. c. congoensis</i><br><i>G. c. cottoni</i><br><i>G. c. infumata</i><br><i>G. c. peralta</i><br><i>G. c. rothschildi</i><br><i>G. c. thornicrofti</i><br><i>G. c. tippelskirchi</i><br><i>G. c. wardi</i><br>(2) <i>G. r. reticulata</i><br><i>G. r. nigrescens</i> |
| 1971 | Krumbiegel    | (1) <i>Giraffa camelopardalis</i><br><br>(2) <i>Giraffa capensis</i>   | (1) <i>G. c. camelopardalis</i><br><i>G. c. antiquorum</i><br><i>G. c. congoensis</i><br><i>G. c. cottoni</i><br><i>G. c. peralta</i><br><i>G. c. reticulata</i><br><i>G. c. rothschildi</i><br>(2) <i>G. c. capensis</i><br><i>G. c. angolensis</i><br><i>G. c. infumata</i><br><i>G. c. tippelskirchi</i><br><i>G. c. thornicrofti</i><br><i>G. c. wardi</i>                            |

|      |                  |                                                                                                                                                                                                                                                                         |                                                                                                                                                                                                                                                                                     |
|------|------------------|-------------------------------------------------------------------------------------------------------------------------------------------------------------------------------------------------------------------------------------------------------------------------|-------------------------------------------------------------------------------------------------------------------------------------------------------------------------------------------------------------------------------------------------------------------------------------|
| 1976 | Dagg and Foster  | <i>Giraffa camelopardalis</i>                                                                                                                                                                                                                                           | <i>G. c. camelopardalis</i><br><i>G. c. angolensis</i><br><i>G. c. antiquorum</i><br><i>G. c. giraffa</i><br><i>G. c. peralta</i><br><i>G. c. reticulata</i><br><i>G. c. rothschildi</i><br><i>G. c. thornicrofti</i><br><i>G. c. tippelskirchi</i>                                 |
| 2007 | Brown et al.     | (1) <i>Giraffa reticulata</i><br>(2) <i>Giraffa rothschildi</i><br>(3) <i>Giraffa peralta</i><br>(4) <i>Giraffa tippelskirchi</i><br>(5) <i>Giraffa giraffa</i><br>(6) <i>Giraffa angolensis</i>                                                                        | -*                                                                                                                                                                                                                                                                                  |
| 2011 | Grubb and Groves | (1) <i>Giraffa camelopardalis</i><br>(2) <i>Giraffa antiquorum</i><br>(3) <i>Giraffa peralta</i><br>(4) <i>Giraffa reticulata</i><br>(5) <i>Giraffa tippelskirchi</i><br>(6) <i>Giraffa thornicrofti</i><br>(7) <i>Giraffa giraffa</i><br>(8) <i>Giraffa angolensis</i> | (1) <i>G. c. camelopardalis</i><br><i>G. c. rothschildi</i><br>(2) <i>G. a. antiquorum</i><br>(3) <i>G. p. peralta</i><br>(4) <i>G. r. reticulata</i><br>(5) <i>G. t. tippelskirchi</i><br>(6) <i>G. t. thornicrofti</i><br>(7) <i>G. g. giraffa</i><br>(8) <i>G. a. angolensis</i> |
| 2016 | Fennessy et al.  | (1) <i>Giraffa camelopardalis</i><br>(2) <i>Giraffa reticulata</i><br>(3) <i>Giraffa tippelskirchi</i><br>(4) <i>Giraffa giraffa</i>                                                                                                                                    | (1) <i>G. c. camelopardalis</i><br><i>G. c. antiquorum</i><br><i>G. c. peralta</i><br><i>G. c. rothschildi</i><br>(2) <i>G. r. reticulata</i><br>(3) <i>G. t. tippelskirchi</i><br><i>G. t. thornicrofti</i><br>(4) <i>G. g. angolensis</i><br><i>G. g. giraffa</i>                 |

\*all used subspecies were elevated to species rank

## References:

- Brisson MJ. Regnum animale in classes IX distributum sive Synopsis methodica. Haak, Paris, Leiden; 1762.
- Brown DM, Brenneman RA, Koepfli KP, Pollinger JP, Milá B, Georgiadis NJ, et al. Extensive population genetic structure in the giraffe. *BMC Biol.* 2007; 5:1-13.
- Dagg AI, Foster JB. The giraffe: its biology, behaviour, and ecology. New York: Van Nostrand Reinhold Company; 1976.
- De Winton WE. On the giraffe of Somaliland. *J Nat Hist.* 1899; 4: 211-212.
- Fennessy J, Bidon T, Reuss F, Kumar V, Elkan P, Nilsson MA, et al. Multi-locus analyses reveal four giraffe species instead of one. *Curr Biol.* 2016; 26: 2543-2549.
- Groves C, Grubb P. Ungulate taxonomy. Maryland: JHU Press; 2011.
- IUCN Red List of Threatened Species. Available from: <http://www.iucnredlist.org>
- Kingdon J, Happold D, Butynski T, Hoffmann M, Happold M, Kalina J. Mammals of Africa. New York: Bloomsbury Publishing; 2013.
- Krumbiegel I. Die Giraffe (*Giraffa camelopardalis*). Lutherstadt Wittenberg: A. Ziemsen Verlag; 1971.
- Linnaeus CV. Systema Naturae. X ed. vol. 1. Holmiae Salvii; 1758.
- Lydekker R. Catalogue of the ungulate mammals in the British Museum (Natural History). 3<sup>rd</sup> ed. London: British Museum Trustees; 1914. pp. 234-257.
- Saint-Hilaire G. Quelques considérations sur la Girafe. *Ann Sci Nat.* 1827; 210-237.
- Thomas O. On the five-horned Giraffe obtained by Sir Marry Johnston near Mount Elgon. *J Zool.* 1901; 71: 474-483.
