# Supplementary material for: A comparative approach for species delimitation based on multiple methods of multi-locus DNA sequence analysis: A case study of the genus Giraffa (Mammalia, Cetartiodactyla)
Source: PubMed Central journal article supplement (PMC7018015; doi:10.1371/journal.pone.0217956), 2020-02-13
Supplement: pone.0217956.s002.pdf [file pone.0217956.s002.pdf]

## S2 Appendix. Phylogenetic analyses

### A comparative approach for species delimitation based on multiple methods of multi-locus DNA sequence analysis: a case study of the genus *Giraffa* (Mammalia, Cetartiodactyla)

Alice Petzold<sup>1,2</sup>, Alexandre Hassanin<sup>1,2\*</sup>

1 Institut de Systématique, Évolution, Biodiversité (ISYEB), Sorbonne Université, MNHN, CNRS, EPHE, Paris, France

2 Muséum national d'Histoire naturelle, CP51, 55 rue Buffon - 75005 Paris, France

\*Correspondence: [alexandre.hassanin@mnhn.fr](mailto:alexandre.hassanin@mnhn.fr)

**Table A.** Overview of the 82 haplotypes used for the mitochondrial analyses, including their code, accession number, and the list of individuals. In case of independent upload of *cytochrome b* and *D-Loop* sequence, respective accession numbers are separated by slash (*cytochrome b* / *D-Loop*).

| n | Haplotype | Representative individual           | Σ  | Geographic origin (frequency)                                                                                                                             | Accession numbers                                                                                                                                                                                                                                                                                         |
|---|-----------|-------------------------------------|----|-----------------------------------------------------------------------------------------------------------------------------------------------------------|-----------------------------------------------------------------------------------------------------------------------------------------------------------------------------------------------------------------------------------------------------------------------------------------------------------|
| 1 | RET1      | EU088319_ <i>reticulata</i> _3      | 22 | Ol Jogi, Laikipia, Kenya (7); Pyramid, Kenya (5); Sweetwaters, Laikipia, Kenya (1); Meru NP, Kenya (5); Samburu NR, Kenya (2); Stuttgart Zoo, Germany (2) | <b>EU088319:</b> MeruReG10, SamburuRe4810, MeruReG11, MeruReG3, OlJogiReR8, MeruReG9, OlJogiRe27, SweetwaRe8, PyramidRe9, PyramidRe11, PyramidRe12, SamburuRe5, PyramidRe5, OlJogiRe13, OlJogiRe9, MeruReG7, OlJogiReR5, PyramidRe7, OlJogiRe15, OlJogiRe2; <b>LT628387/ LT628414; MG262296/ MG257963</b> |
| 2 | RET2      | RET_RetNue3                         | 1  | Nuernberg Zoo (1)                                                                                                                                         | <b>LT628410/ LT628383</b>                                                                                                                                                                                                                                                                                 |
| 3 | RET3      | EU088320_ <i>reticulata</i> _4      | 15 | Ol Jogi, Laikipia, Kenya (4); Pyramid, Kenya (2); Sweetwaters, Laikipia, Kenya (2); Samburu NR, Kenya (7)                                                 | <b>EU088320:</b> SamburuRe4812, SamburuRe4813, SamburuRe4816, OlJogiReR6, SamburuRe4815, SamburuRe4818, SamburuRe4819, OlJogiRe25, SweetwaRe1, SweetwaRe2, OlJogiRe10, OlJogiRe12, PyramidRe3, SamburuRe4, PyramidRe8                                                                                     |
| 4 | RET4      | EU088322_ <i>reticulata</i> _6      | 13 | Ol Jogi, Laikipia, Kenya (3); Pyramid, Kenya (2); Sweetwaters, Laikipia, Kenya (6); Meru NP, Kenya (1); Samburu NR, Kenya (1)                             | <b>EU088322:</b> SamburuRe4817, OlJogiRe21, MeruReG4, SweetwaReGS44, SweetwaRe6, SweetwaReGS43, SweetwaRe11, SweetwaRe5, SweetwaRe4, OlJogiRe3, PyramidRe10, PyramidRe1, OlJogiRe4                                                                                                                        |
| 5 | RET5      | EF442272_ <i>reticulata</i> _Zenith | 7  | Singean African Reserve, France (2); Nuernberg Zoo, Germany (3); Pyramid, Kenya (1); Rotterdam Zoo, Netherlands (1)                                       | <b>EF442272:</b> Zenith, Désirée; <b>EU088325:</b> PyramidRe4; <b>LT628409/ LT628382; LT628411/ LT628384; LT628413/ LT628386; MG262293/ MG257960</b>                                                                                                                                                      |

|    |       |                                |    |                                                                                                              |                                                                                                                                                                                                                                                                                                                                                                                                     |
|----|-------|--------------------------------|----|--------------------------------------------------------------------------------------------------------------|-----------------------------------------------------------------------------------------------------------------------------------------------------------------------------------------------------------------------------------------------------------------------------------------------------------------------------------------------------------------------------------------------------|
| 6  | RET6  | EU088324_ <i>reticulata</i> _8 | 2  | Pyramid, Laikipia, Kenya (2)                                                                                 | EU088324: PyramidRe2, PyramidRe6                                                                                                                                                                                                                                                                                                                                                                    |
| 7  | RET7  | EU088323_ <i>reticulata</i> _7 | 2  | Sweetwaters, Laikipia, Kenya (1);<br>Rotterdam Zoo, Netherlands (1)                                          | EU088323; MG262294/ MG257961                                                                                                                                                                                                                                                                                                                                                                        |
| 8  | RET8  | RET_RetNue5                    | 3  | Nuernberg Zoo, Germany (1);<br>Rotterdam Zoo, Netherlands (1);<br>Loisaba Wildlife Conservancy,<br>Kenya (1) | LT628412/ LT628385; MG262295/<br>MG257962; MG262285/ MG257952                                                                                                                                                                                                                                                                                                                                       |
| 9  | RET9  | EU088321_ <i>reticulata</i> _5 | 1  | ?                                                                                                            | ?                                                                                                                                                                                                                                                                                                                                                                                                   |
| 10 | RET10 | <i>reticulata</i> _ISC03       | 1  | Ishqbini Conservancy, Kenya (1)                                                                              | KY865164/ KY865127                                                                                                                                                                                                                                                                                                                                                                                  |
| 11 | RET11 | <i>reticulata</i> _ISC04       | 1  | Ishqbini Conservancy, Kenya (1)                                                                              | KY865165/ KY865128                                                                                                                                                                                                                                                                                                                                                                                  |
| 12 | RET12 | <i>reticulata</i> _ISC05       | 1  | Ishqbini Conservancy, Kenya (1)                                                                              | KY865166/ KY865129                                                                                                                                                                                                                                                                                                                                                                                  |
| 13 | RET13 | <i>reticulata</i> _ISC08       | 1  | Ishqbini Conservancy, Kenya (1)                                                                              | KY865167/ KY865130                                                                                                                                                                                                                                                                                                                                                                                  |
| 14 | PER1  | EF442274_ <i>peralta</i>       | 28 | Harikanassou Region, Niger (15);<br>Koure, Niger (12); Niamey-Dosso<br>Road, Niger (1)                       | EU088317: Niger15, Niger16, Niger17,<br>Niger19, Niger10, Niger22, Niger23,<br>Niger28, Niger7, Niger12, Niger13,<br>Niger14, Niger2B, Niger3C, Niger21;<br>EF442274: PER1, PER2, PER3, DOSSO;<br>HG975175/ HG975277; HG975176/<br>HG975278; HG975180/ HG975282;<br>HG975181/ HG975283; HG975183/<br>HG975285; HG975184/ HG975286;<br>HG975185/ HG975287; MG262299/<br>MG257966; MG262297/ MG257964 |
| 15 | PER2  | <i>peralta</i> _WA36           | 1  | Koure, Niger (1)                                                                                             | HG975177/ HG975279                                                                                                                                                                                                                                                                                                                                                                                  |
| 16 | PER3  | <i>peralta</i> _WA623          | 2  | Koure, Niger (2)                                                                                             | HG975186/ HG975288; HG975188/<br>HG975290                                                                                                                                                                                                                                                                                                                                                           |
| 17 | PER4  | EU088318_ <i>peralta</i> _2    | 12 | Harikanassou Region, Niger (7);<br>Koure, Niger (5)                                                          | EU088318: Niger20, Niger26, Niger27,<br>Niger18, Niger5, Niger1A, Niger4D;<br>HG975178/ HG975280; HG975182/<br>HG975284; HG975187/ HG975289;<br>MG262301/ MG257968; MG262300/<br>MG257967                                                                                                                                                                                                           |
| 18 | PER5  | <i>peralta</i> _WA705          | 1  | Koure, Niger (1)                                                                                             | MG262298/ MG257965                                                                                                                                                                                                                                                                                                                                                                                  |

|    |       |                             |    |                                                                                                                                        |                                                                                                                                                                                                                                                                                                                                                                                                                                                                                                                                                                                                                                                                                                                                                                                                                                                                                                                         |
|----|-------|-----------------------------|----|----------------------------------------------------------------------------------------------------------------------------------------|-------------------------------------------------------------------------------------------------------------------------------------------------------------------------------------------------------------------------------------------------------------------------------------------------------------------------------------------------------------------------------------------------------------------------------------------------------------------------------------------------------------------------------------------------------------------------------------------------------------------------------------------------------------------------------------------------------------------------------------------------------------------------------------------------------------------------------------------------------------------------------------------------------------------------|
| 19 | ROTH1 | EF442273_rothschildi_Roby   | 59 | Nakuru NP; Kenya (7); Ruma, Kenya (9); Thoiry Zoological Park, France (1); La Palmyre Zoo, France (1); Murchison Falls NP, Uganda (41) | EF442273: Eole_1137, Roby_A4216;<br>EU088326: NakuruRoGN13, NakuruRoGN15, RumaRoGR33, RumaRoGR34, RumaRoGR38, RumaRoGR39, RumaRoGR40, NakuruRoGN16, NakuruRoGN18, NakuruRoGN19, NakuruRoGN23, NakuruRoGN28, RumaRoGR36, RumaRoGR37, RumaRoGR42, RumaRoGR31, MFNPF3Roth, MFNPF4Roth, MFNPF5Roth, MFNPF7Roth, MFNPF9Roth, MFNPF10Roth, MFNPF12Roth, MFNPF13Roth, MFNPF11Roth, MFNPF14Roth, MFNPF15Roth, MFNPF16Roth, MFNPM1Roth, MFNPM2Roth, MFNPM3Roth, MFNPM4Roth, MFNPM5Roth, MFNPM8Roth, MFNPM17Roth, MFNPM18Roth, MFNPM19Roth, MFNPM20Roth, MFNPM22Roth, MFNPM23Roth, MFNPM24Roth;<br>HG975130/ HG975232; HG975131/ HG975233; HG975132/ HG975234; HG975133/ HG975235; HG975134/ HG975236; HG975135/ HG975237; HG975136/ HG975238; HG975137/ HG975239; HG975138/ HG975240; MG262286/ MG257953; MG262287/ MG257954; MG262288/ MG257955; MG262289/ MG257956; MG262290/ MG257957; MG262291/ MG257958; MG262292/ MG257959 |
| 20 | ROTH2 | EU088327_rothschildi_11     | 2  | Nakuru NP, Kenya (1); Ruma, Kenya (1)                                                                                                  | EU088327: NakuruRoGN14, RumaRoGR32                                                                                                                                                                                                                                                                                                                                                                                                                                                                                                                                                                                                                                                                                                                                                                                                                                                                                      |
| 21 | ROTH3 | EU088328_rothschildi_12     | 8  | Ruma, Kenya (2); Nakuru NP, Kenya (6)                                                                                                  | EU088328: NakuruRoGN24, RumaRoGR41, NakuruRoGN17, NakuruRoGN20, NakuruRoGN22, NakuruRoGN29, NakuruRoGN30, RumaRoGR35                                                                                                                                                                                                                                                                                                                                                                                                                                                                                                                                                                                                                                                                                                                                                                                                    |
| 22 | CAM1  | camelopardalis_BaNP4        | 1  | Badingilo National Park, South Sudan (1)                                                                                               | LT628396/ LT628369                                                                                                                                                                                                                                                                                                                                                                                                                                                                                                                                                                                                                                                                                                                                                                                                                                                                                                      |
| 23 | CAM2  | camelopardalis_ETH1         | 1  | Gambella National Park, Ethiopia (1)                                                                                                   | LT628397/ LT628370                                                                                                                                                                                                                                                                                                                                                                                                                                                                                                                                                                                                                                                                                                                                                                                                                                                                                                      |
| 24 | CAM3  | camelopardalis_BaNP3        | 1  | Badingilo National Park, South Sudan (1)                                                                                               | LT628395/ LT628368                                                                                                                                                                                                                                                                                                                                                                                                                                                                                                                                                                                                                                                                                                                                                                                                                                                                                                      |
| 25 | CAM4  | camelopardalis_ETH2         | 2  | Gambella National Park, Ethiopia (2)                                                                                                   | MG262281/ MG257948; MG262282/ MG257949                                                                                                                                                                                                                                                                                                                                                                                                                                                                                                                                                                                                                                                                                                                                                                                                                                                                                  |
| 26 | ANT1  | antiquorum_GNP04            | 2  | Garamba National Park, DRC (2)                                                                                                         | HG975129/ HG975231; MG262284/ MG25795                                                                                                                                                                                                                                                                                                                                                                                                                                                                                                                                                                                                                                                                                                                                                                                                                                                                                   |
| 27 | ANT2  | EF442265_antiquorum_Rafiki  | 2  | Vincennes Zoo, Paris (2)                                                                                                               | EF442265: Rafiki_ZA4128, Uma_ZA4124                                                                                                                                                                                                                                                                                                                                                                                                                                                                                                                                                                                                                                                                                                                                                                                                                                                                                     |
| 28 | ANT3  | EF442268_antiquorum_Waza    | 3  | Waza NP, Cameroon (2), Boubou Njida NP, Cameroon (1)                                                                                   | EF442268: WAZA1, WAZA2, BOUBA                                                                                                                                                                                                                                                                                                                                                                                                                                                                                                                                                                                                                                                                                                                                                                                                                                                                                           |
| 29 | ANT4  | EF442266_antiquorum_Zakouma | 2  | Zakouma NP, Chad (2)                                                                                                                   | EF442266: ZAK1, ZAK2                                                                                                                                                                                                                                                                                                                                                                                                                                                                                                                                                                                                                                                                                                                                                                                                                                                                                                    |
| 30 | ANT5  | antiquorum_ZNP01            | 1  | Zakouma NP, Chad (1)                                                                                                                   | HG975179/ HG975281                                                                                                                                                                                                                                                                                                                                                                                                                                                                                                                                                                                                                                                                                                                                                                                                                                                                                                      |
| 31 | ANT6  | EF442267_antiquorum_Sarah   | 3  | Antwerp Zoo, Belgium (1); Vincennes Zoo, France (1); Shambe National Park, South Sudan (1)                                             | EF442267: Sarah_M9271, Valere_M9633B; LT628417/ LT628390                                                                                                                                                                                                                                                                                                                                                                                                                                                                                                                                                                                                                                                                                                                                                                                                                                                                |
| 32 | ANT7  | antiquorum_SNR1             | 4  | Shambe National Park, South Sudan (1); Garamba National Park, Democratic Republic of Congo (DRC) (3)                                   | LT628389/ LT628416; HG975127/ HG975229; HG975128/ HG975230; MG262283/ MG257950                                                                                                                                                                                                                                                                                                                                                                                                                                                                                                                                                                                                                                                                                                                                                                                                                                          |

|    |       |                                        |    |                                                                                                                                                                      |                                                                                                                                                                                                                                                                                                                                                                                                                                                                                                |
|----|-------|----------------------------------------|----|----------------------------------------------------------------------------------------------------------------------------------------------------------------------|------------------------------------------------------------------------------------------------------------------------------------------------------------------------------------------------------------------------------------------------------------------------------------------------------------------------------------------------------------------------------------------------------------------------------------------------------------------------------------------------|
| 33 | THO1  | <i>thornicrofti</i> _LVNP8_01          | 34 | Luangwa Valley NP, Zambia (34)                                                                                                                                       | <b>HF571134 - HF571167 / HF571176 - HF571209</b>                                                                                                                                                                                                                                                                                                                                                                                                                                               |
| 34 | TIP1  | EU088330_ <i>tippelskirchi</i> _14     | 16 | Seronera Serengeti NP, Tanzania (3); Ndotu Serengeti NP, Tanzania (7); Lobo Serengeti NP, Tanzania (4); Manyara NP, Tanzania (2)                                     | <b>EU088330:</b> SeroneraM1404, SeroneraM4735, SeroneraM4741, NdotuM4860, NdotuM4861, NdotuM4858, NdotuM4865, NdotuM4864, NdotuM4868, NdotuM4869, Lobo2097, Lobo2054, Lobo2067, Lobo2068, Manyara4845, Manyara4846                                                                                                                                                                                                                                                                             |
| 35 | TIP2  | EU088337_ <i>tippelskirchi</i> _21     | 3  | Seronera Serengeti NP, Tanzania (1); Ndotu Serengeti NP, Tanzania (2)                                                                                                | <b>EU088337:</b> SeroneraM4743, NdotuM4862, NdotuM4870                                                                                                                                                                                                                                                                                                                                                                                                                                         |
| 36 | TIP3  | EU088340_ <i>tippelskirchi</i> _24     | 1  | Lobo Serengeti NP, Tanzania (1)                                                                                                                                      | <b>EU088340</b>                                                                                                                                                                                                                                                                                                                                                                                                                                                                                |
| 37 | TIP4  | EU088338_ <i>tippelskirchi</i> _22     | 3  | Ndotu Serengeti NP, Tanzania (2); Ngorongoro Serengeti NP, Tanzania (1)                                                                                              | <b>EU088338:</b> NdotuM4859, NdotuM4867, NgorongoroM4903                                                                                                                                                                                                                                                                                                                                                                                                                                       |
| 38 | TIP5  | EU088339_ <i>tippelskirchi</i> _23     | 1  | Varicho, Serengeti NP; Tanzania (1)                                                                                                                                  | <b>EU088339</b>                                                                                                                                                                                                                                                                                                                                                                                                                                                                                |
| 39 | TIP6  | EF442269_ <i>tippelskirchi</i> _Saburi | 36 | Basel Zoo, Switzerland (2); Athi River Ranch, Kenya (5); Chyulu Hills, Kenya (13); Manyara NP, Tanzania (5); Lake Naivasha, Tanzania (4); Tarangire NP; Tanzania (7) | <b>EF442269:</b> Wari_990681, Saburi_950677; <b>EU088329:</b> TarangireM2244, TarangireM2232, ChyuluM21, AthiM7, ChyuluM12, ChyuluM22, ChyuluM5, AthiM6, AthiM3, AthiM14, ChyuluM1, ChyuluM11, ChyuluM17, ChyuluM18, ChyuluM19, ChyuluM2, ChyuluM24, ChyuluM6, NaivashaM5021, NaivashaM5026, NaivashaM5022, ManyaraM4848, Chyulu16, TarangireM2245, TarangireM2274, AthiM24, TarangireM2234, TarangireM2236, TarangireM2267, NaivashaM5018, Manyara4841, Manyara4842, Manyara4843, Manyara4847 |
| 40 | TIP7  | EU088335_ <i>tippelskirchi</i> _19     | 1  | Athi River Ranch Kenya (1)                                                                                                                                           | <b>EU088335</b>                                                                                                                                                                                                                                                                                                                                                                                                                                                                                |
| 41 | TIP8  | <i>tippelskirchi</i> _SGR01            | 6  | Selous Game Reserve, Tanzania (6)                                                                                                                                    | <b>HG975158/ HG975260; HG975159/ HG975261; HG975160/ HG975262; HG975161/ HG975263; HG975162/ HG975264; HG975163/ HG975265</b>                                                                                                                                                                                                                                                                                                                                                                  |
| 42 | TIP9  | EU088342_ <i>tippelskirchi</i> _26     | 2  | Tarangire NP, Tanzania (2)                                                                                                                                           | <b>EU088342:</b> TarangireM2265, TarangireM2251                                                                                                                                                                                                                                                                                                                                                                                                                                                |
| 43 | TIP10 | EU088331_ <i>tippelskirchi</i> _15     | 7  | Chyulu Hills, Kenya (2); Manyara NP, Tanzania (2); Tarangire NP, Tanzania (1); Lake Naivasha, Tanzania (2)                                                           | <b>EU088331:</b> TarangireM2271, ChyuluM23, ChyuluM4, NaivashaM5016, NaivashaM5017, Manyara4840, Manyara4839                                                                                                                                                                                                                                                                                                                                                                                   |
| 44 | TIP11 | EU088333_ <i>tippelskirchi</i> _17     | 2  | Athi River Ranch, Kenya (2)                                                                                                                                          | <b>EU088333:</b> AthiM18, AthiM1                                                                                                                                                                                                                                                                                                                                                                                                                                                               |
| 45 | TIP12 | EU088332_ <i>tippelskirchi</i> _16     | 1  | Tarangire NP, Tanzania (1)                                                                                                                                           | <b>EU088332</b>                                                                                                                                                                                                                                                                                                                                                                                                                                                                                |
| 46 | TIP13 | EU088341_ <i>tippelskirchi</i> _25     | 2  | Tarangire NP, Tanzania (2)                                                                                                                                           | <b>EU088341:</b> TarangireM2237, TarangireM2259                                                                                                                                                                                                                                                                                                                                                                                                                                                |
| 47 | TIP14 | EU088336_ <i>tippelskirchi</i> _20     | 1  | Chyulu Hills, Kenya (1)                                                                                                                                              | <b>EU088336</b>                                                                                                                                                                                                                                                                                                                                                                                                                                                                                |
| 48 | TIP15 | EU088334_ <i>tippelskirchi</i> _18     | 9  | Athi River Ranch, Kenya (9)                                                                                                                                          | <b>EU088334:</b> AthiM8, AthiM21, AthiM5, AthiM13, AthiM2, AthiM11, AthiM15, AthiM22, AthiM23                                                                                                                                                                                                                                                                                                                                                                                                  |

|    |       |                              |    |                                                                                                                                                                                                                                                                                                                                                                                                                                                                                                                                                                                                                                                                                 |
|----|-------|------------------------------|----|---------------------------------------------------------------------------------------------------------------------------------------------------------------------------------------------------------------------------------------------------------------------------------------------------------------------------------------------------------------------------------------------------------------------------------------------------------------------------------------------------------------------------------------------------------------------------------------------------------------------------------------------------------------------------------|
|    |       |                              |    | EF442271; EU088343: Botswana903, Kruger9, Kruger5, Kruger7, Kruger8, Kruger20, Kruger25, Kruger27, Kruger1, Kruger12, Kruger14; HF571212; HF571215; HF571216; HG975203; HG975207; HG975208; HG975209; HG975211; HG975241; HG975245; HG975247; HG975248; HG975255; HG975257; HG975258; HG975266; HG975267; HG975268; HG975269; HG975270; HG975271; HG975273; HG975274; HG975275; HG975276; LT628398/ LT628371; LT628399/ LT628372; LT628400/ LT628373; LT628401/ LT628374; LT628402/ LT628375; LT628404/ LT628377; LT628405/ LT628378; LT628406/ LT628379; LT628407/ LT628380; LT628408/ LT62838; LT628418/ LT628391; LT628419/ LT628392; LT628420/ LT628393; LT628421/ LT628394 |
| 49 | GFA1  | EF442271_giraffa_Phalarborwa | 51 | Kruger National Park, South Africa (10); Serondella Zimbabwe (1); Phalabowa Limpopo, South Africa (1); Moremi Game Reserve, Botswana (5); Sun Hotel Livingstone, Zambia (4); Vumbura Concession, Botswana (10); Chobe National Park, Botswana (7); Mosi-oa-Tunya NP, Zambia (10); Khamab Kalahari Reserve, South Africa (3)                                                                                                                                                                                                                                                                                                                                                     |
| 50 | GFA2  | giraffa_SNNP                 | 1  | Sioma Ngwezi NP, Zambia (1) LT628415/ LT628388                                                                                                                                                                                                                                                                                                                                                                                                                                                                                                                                                                                                                                  |
| 51 | GFA3  | giraffa_BW01                 | 7  | Bwabwata National Park, Namibia (7) HG975087/ HG975189; HG975088/ HG975190; HG975089/ HG975191; HG975090/ HG975192; HG975091/ HG975193; HG975092/ HG975194; HG975093/ HG975195                                                                                                                                                                                                                                                                                                                                                                                                                                                                                                  |
| 52 | GFA4  | giraffa_CNP9_08              | 1  | Chobe NP, Botswana (1) HG975104/ HG975206                                                                                                                                                                                                                                                                                                                                                                                                                                                                                                                                                                                                                                       |
| 53 | GFA5  | giraffa_MGR9_20              | 1  | Moremi Game Reserve, Botswana (1) HG975151/ HG975253                                                                                                                                                                                                                                                                                                                                                                                                                                                                                                                                                                                                                            |
| 54 | GFA6  | giraffa_MTNP6                | 1  | Mosi-oa-Tunya NP, Zambia (1) LT628403/ LT628376                                                                                                                                                                                                                                                                                                                                                                                                                                                                                                                                                                                                                                 |
| 55 | GFA7  | EF442270_giraffa_Tango       | 5  | Thoiry Reserve, France (1); Kruger National Park, South Africa (1); Khamab Kalahari Reserve, South Africa (3) EF442270; EU088344: Kruger23; HG975152/ HG975254; HG975154/ HG975256; HG975157/ HG975259                                                                                                                                                                                                                                                                                                                                                                                                                                                                          |
| 56 | GFA8  | giraffa_CNP9_06              | 1  | Chobe NP, Botswana (1) HG975102/ HG975204                                                                                                                                                                                                                                                                                                                                                                                                                                                                                                                                                                                                                                       |
| 57 | GFA9  | giraffa_CNP9_07              | 1  | Chobe NP, Botswana (1) HG975103/ HG975205                                                                                                                                                                                                                                                                                                                                                                                                                                                                                                                                                                                                                                       |
| 58 | GFA10 | giraffa_MGR9_11              | 4  | Moremi Game Reserve, Botswana (2); Chobe NP, Botswana (2) HF571168/ HF571210; HF571169/ HF571211; HF571175/ HF571217; HG975108/ HG975210                                                                                                                                                                                                                                                                                                                                                                                                                                                                                                                                        |
| 59 | GFA11 | giraffa_NXP9_01              | 2  | Nxai Pans, Botswana (1); Vumbura Concession, Botswana (1) HF571171/ HF571213; HG975170/ HG975272                                                                                                                                                                                                                                                                                                                                                                                                                                                                                                                                                                                |
| 60 | GFA12 | giraffa_MGR9_05              | 1  | Moremi Game Reserve, Botswana (1) HG975142/ HG975244                                                                                                                                                                                                                                                                                                                                                                                                                                                                                                                                                                                                                            |
| 61 | GFA13 | giraffa_MGR9_02              | 7  | Moremi Game Reserve, Botswana (7) HG975140/ HG975242; HG975141/ HG975243; HG975144/ HG975246; HG975147/ HG975249; HG975148/ HG975250; HG975149/ HG975251; HG975150/ HG975252                                                                                                                                                                                                                                                                                                                                                                                                                                                                                                    |
| 62 | ANG1  | EF442264_angolensis_Lisbon6A | 4  | Lisbon Zoo, Portugal (1); Etosha NP, Namibia (3) EF442264; HG975110/ HG975212; HG975112/ HG975224; HG975125/ HG975227                                                                                                                                                                                                                                                                                                                                                                                                                                                                                                                                                           |
| 63 | ANG2  | EF442263_angolensis_Lisbon5A | 7  | Lisbon Zoo, Portugal (1); Etosha NP, Namibia (5); Hoarsib River, Namibia (1) EF442263; EU088350: HSBM3; HG975114/ HG975216; HG975116/ HG975218; HG975117/ HG975219; HG975119/ HG975221; HG975121/ HG975223                                                                                                                                                                                                                                                                                                                                                                                                                                                                      |
| 64 | ANG3  | angolensis_ENP08             | 2  | Etosha NP, Namibia (2) HG975115/ HG975217; HG975120/ HG975222                                                                                                                                                                                                                                                                                                                                                                                                                                                                                                                                                                                                                   |

|    |       |                        |    |                                                                                   |                                                                                                                                                                                                                                                                                                                                                                                                                                                                        |
|----|-------|------------------------|----|-----------------------------------------------------------------------------------|------------------------------------------------------------------------------------------------------------------------------------------------------------------------------------------------------------------------------------------------------------------------------------------------------------------------------------------------------------------------------------------------------------------------------------------------------------------------|
| 65 | ANG4  | EU088345_angolensis_29 | 13 | Etosha NP, Namibia (13)                                                           | EU088345: ENPF1, ENPF6, ENPF3, ENPF4, ENPM1, ENPM2, ENPM3, ENPM5, ENPF5, ENPF2; EU088349: ENPM7, ENPM4; HG975228                                                                                                                                                                                                                                                                                                                                                       |
| 66 | ANG5  | EU088346_angolensis_30 | 2  | Etosha NP, Namibia (1); Kamanjab, Namibia (1)                                     | EU088346: ENPF7, KMJM1                                                                                                                                                                                                                                                                                                                                                                                                                                                 |
| 67 | ANG6  | EU088347_angolensis_31 | 33 | Hoanib River, Namibia (27); Hoarusib River, Namibia (2); Northwestern Namibia (4) | EU088347: HBNF1, HBNF2, HBNF3, HBNF4, HBNF6, HBNF7, HBNF8, HNB M7, HNB M3, HNB M4, HNB M5, HNB M8, HNB M6, KHBM1, KHBM2, KHBM3, KHB F1; KY865151/ KY865114; KY865152/ KY865115; KY865153/ KY865116; KY865154/ KY865117; KY865155/ KY865118; KY865156/ KY865119; KY865157/ KY865120; KY865158/ KY865121; KY865159/ KY865122; KY865160/ KY865123; KY865161/ KY865124; KY865162/ KY865125; KY865168/ KY865131; KY865171/ KY865134; KY865172/ KY865135; KY865173/ KY865136 |
| 68 | ANG7  | EU088348_angolensis_32 | 8  | Etosha NP, Namibia (7); Hoanib River, Namibia (1)                                 | EU088348: ENPM6, ENPF8; HG975111/ HG975213; HG975112/ HG975214; HG975113/ HG975215; HG975123/ HG975225; HG975124/ HG975226; KY865149/ KY865112                                                                                                                                                                                                                                                                                                                         |
| 69 | ANG8  | EU088351_angolensis_35 | 3  | Hoarusib River, Namibia (1); Northwestern Namibia (2)                             | EU088351; KY865170/ KY865133; KY865174/ KY865137                                                                                                                                                                                                                                                                                                                                                                                                                       |
| 70 | ANG9  | angolensis_CKGR9_01    | 3  | Central Kalahari Game Reserve, Botswana (3)                                       | HG975094/ HG975196; HG975096/ HG975198; HG975098/ HG975200                                                                                                                                                                                                                                                                                                                                                                                                             |
| 71 | ANG10 | angolensis_CKGR9_05    | 1  | Central Kalahari Game Reserve, Botswana (1)                                       | HG975097/ HG975199                                                                                                                                                                                                                                                                                                                                                                                                                                                     |
| 72 | ANG11 | angolensis_CKGR9_02    | 2  | Central Kalahari Game Reserve, Botswana (2)                                       | HG975095/ HG975197; HG975099/ HG975201                                                                                                                                                                                                                                                                                                                                                                                                                                 |
| 73 | ANG12 | angolensis_ENP13       | 1  | Etosha NP, Namibia (1)                                                            | HG975118/ HG975220                                                                                                                                                                                                                                                                                                                                                                                                                                                     |
| 74 | ANG13 | angolensis_CKGR9_08    | 1  | Central Kalahari Game Reserve, Botswana (1)                                       | HG975100/ HG975202                                                                                                                                                                                                                                                                                                                                                                                                                                                     |
| 75 | ANG14 | angolensis_NWN03       | 1  | Northwestern Namibia (1)                                                          | KY865169/ KY865132                                                                                                                                                                                                                                                                                                                                                                                                                                                     |
| 76 | ANG15 | angolensis_HSB04       | 1  | Hoarusib River, Namibia (1)                                                       | KY865163/ KY865126                                                                                                                                                                                                                                                                                                                                                                                                                                                     |
| 77 | ANG16 | angolensis_HNB001      | 1  | Hoanib River, Namibia (1)                                                         | KY865148/ KY865111                                                                                                                                                                                                                                                                                                                                                                                                                                                     |
| 78 | ANG17 | angolensis_HNB102      | 1  | Hoanib River, Namibia (1)                                                         | KY865150/ KY865113                                                                                                                                                                                                                                                                                                                                                                                                                                                     |
| 79 | ANG18 | angolensis_BVC001      | 7  | Bubye Valley Conservancy, Zimbabwe (7)                                            | KY865138/ KY865101; KY865139/ KY865102; KY865140/ KY865103; KY865141/ KY865104; KY865143/ KY865106; KY865146/ KY865109; KY865147/ KY865110                                                                                                                                                                                                                                                                                                                             |
| 80 | ANG19 | angolensis_BVC005      | 1  | Bubye Valley Conservancy, Zimbabwe (1)                                            | KY865142/ KY865105                                                                                                                                                                                                                                                                                                                                                                                                                                                     |
| 81 | ANG20 | angolensis_BVC007      | 1  | Bubye Valley Conservancy, Zimbabwe (1)                                            | KY865144/ KY865107                                                                                                                                                                                                                                                                                                                                                                                                                                                     |
| 82 | ANG21 | angolensis_BVC008      | 1  | Bubye Valley Conservancy, Zimbabwe (1)                                            | KY865145/ KY865108                                                                                                                                                                                                                                                                                                                                                                                                                                                     |

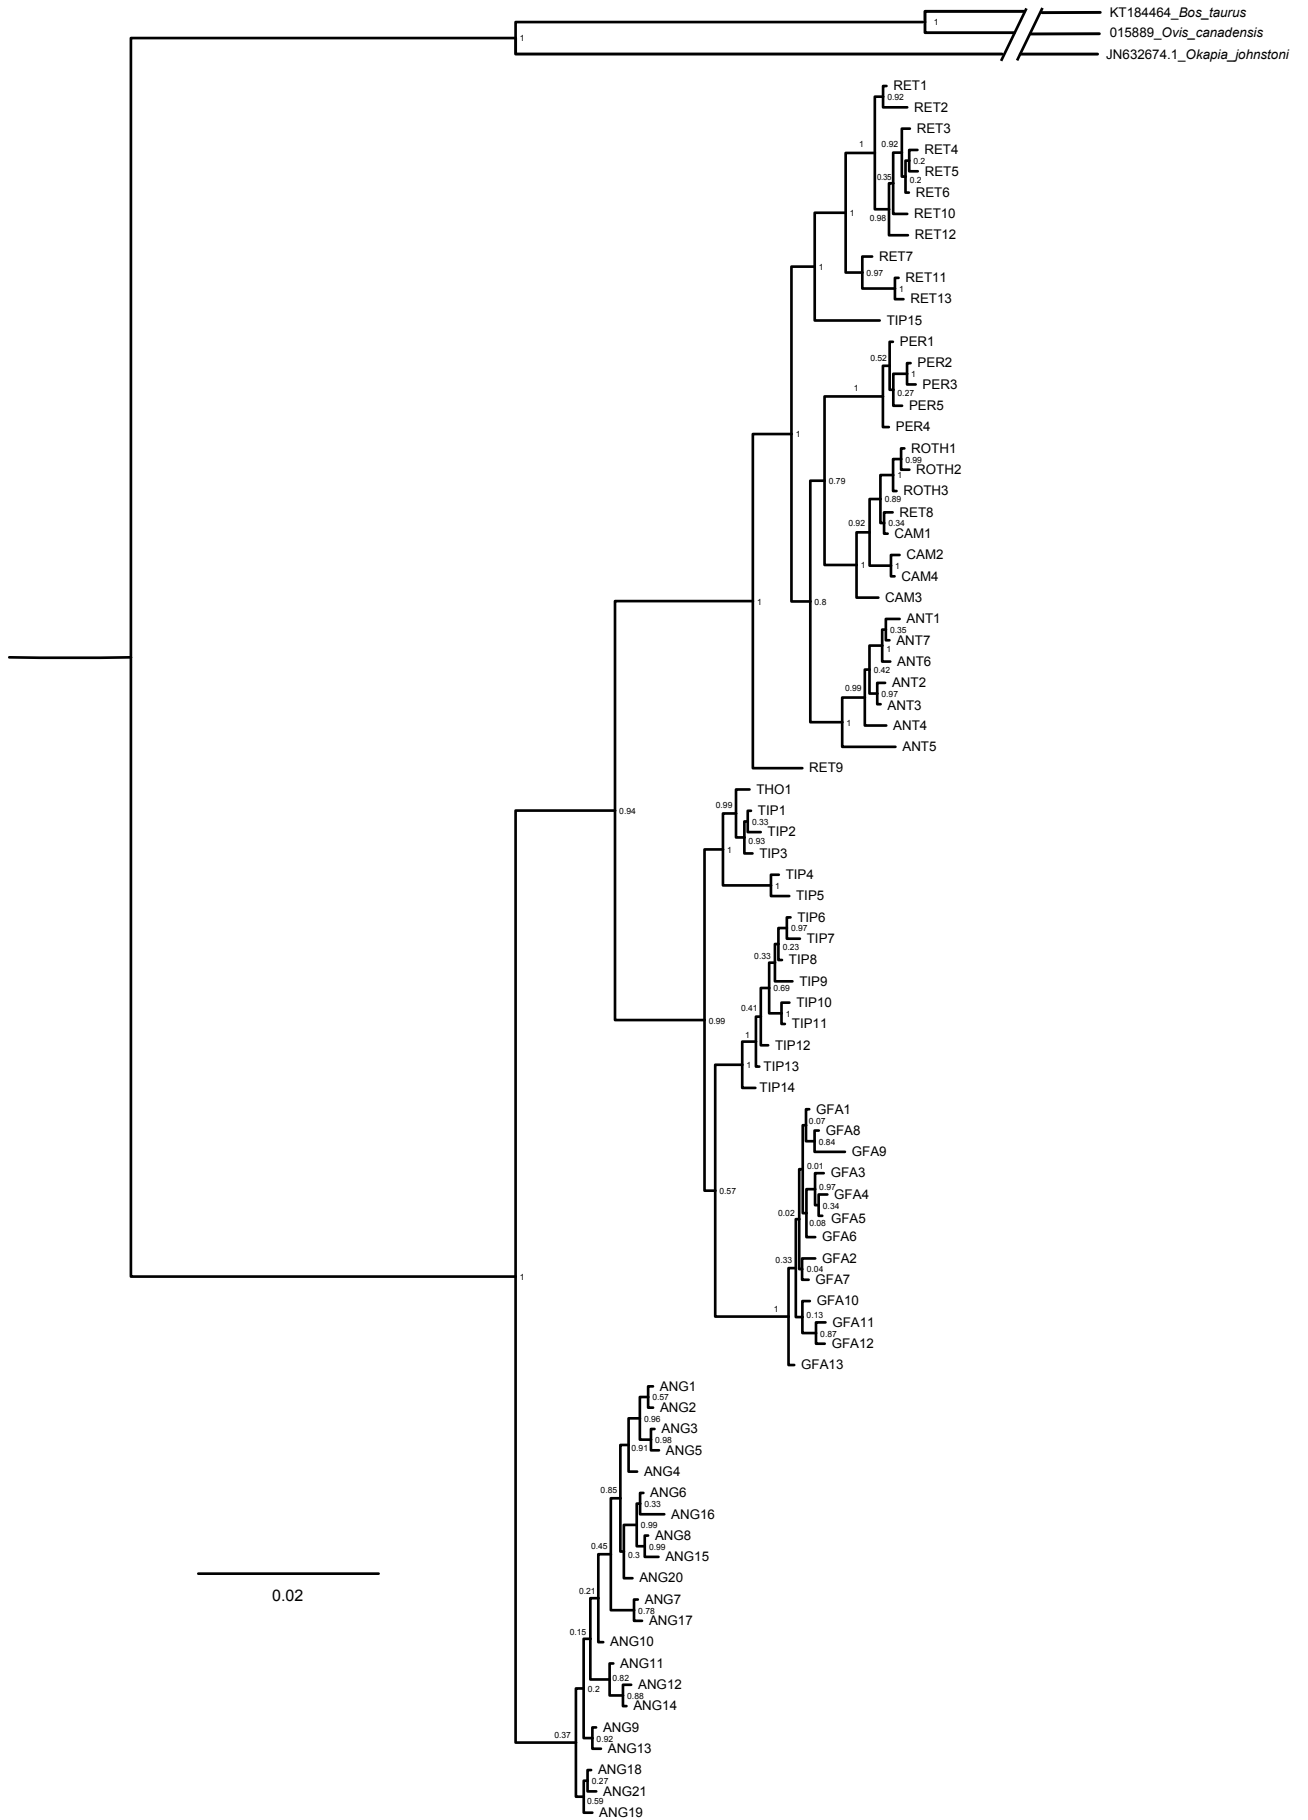

**Fig A.** Bayesian trees from the analyses of the mitochondrial fragment (*cytochrome b* and the partial 5' region) including 82 haplotypes of 507 giraffe individuals and three outgroup taxa. The posterior probability values are indicated for each node.

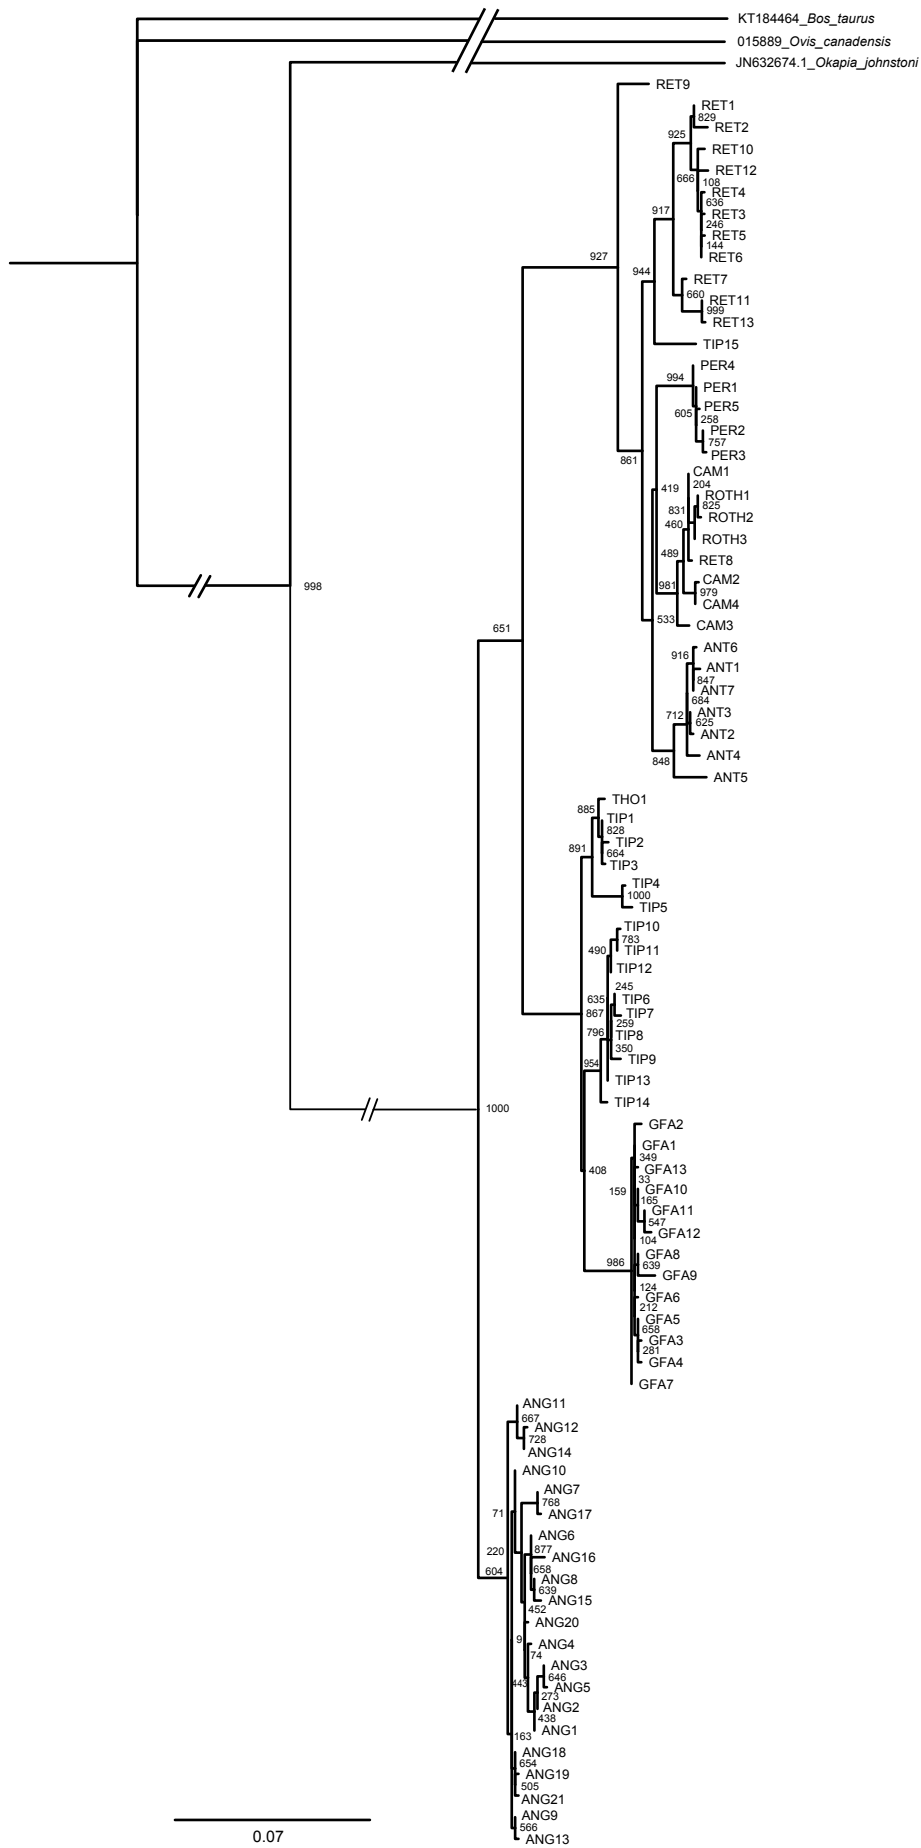

**Fig B.** PhyML trees from the Maximum Likelihood analyses of the mitochondrial fragment (*cytochrome b* and the partial 5' region) including 82 haplotypes from 507 giraffe individuals and three outgroup taxa.



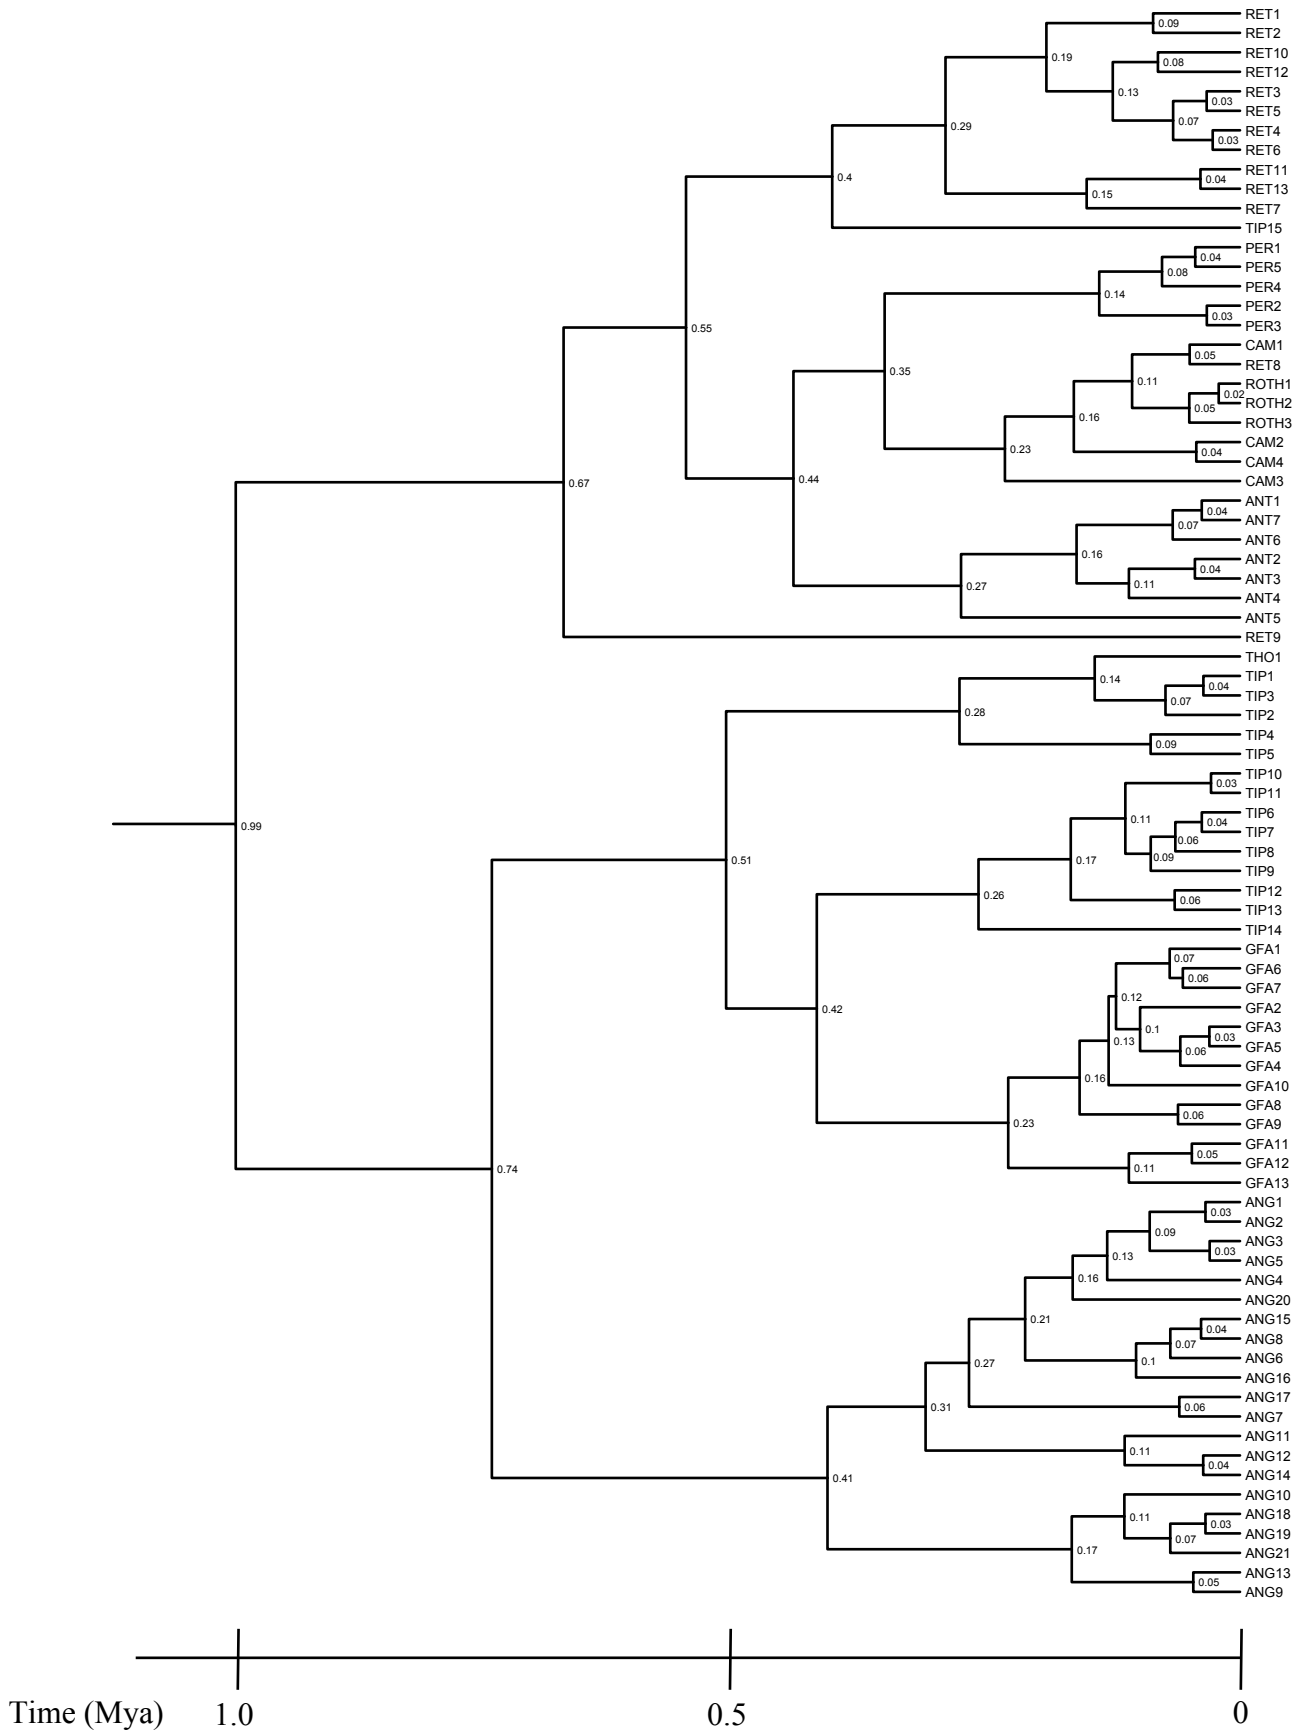

**Fig C.** Chronogram obtained from the analysis of the mitochondrial fragment (*cytochrome b* and the partial 5' region) including 82 giraffe haplotypes and three outgroup taxa (not shown). The datations were estimated using BEAST v.2.4.7 with the following priors: relaxed clock Log normal; calibration for the MRCA of Giraffa = 1 +/- 0.1 Mya ; Yule model; 100000000 generations; Log and tree every 10000.

**Table B.** Individual code, designation of subspecies and origin of 137 giraffes used in the phylogenetic and population structure analyses of the nuclear dataset

| <b>Individual</b> | <b>Subspecies designation</b> | <b>Origin</b>                         |
|-------------------|-------------------------------|---------------------------------------|
| WA026             | <i>peralta</i>                | Koure, Niger                          |
| WA036             | <i>peralta</i>                | Koure, Niger                          |
| WA606             | <i>peralta</i>                | Koure, Niger                          |
| WA117             | <i>peralta</i>                | Koure, Niger                          |
| WA609             | <i>peralta</i>                | Koure, Niger                          |
| WA612             | <i>peralta</i>                | Koure, Niger                          |
| WA614             | <i>peralta</i>                | Koure, Niger                          |
| WA619             | <i>peralta</i>                | Koure, Niger                          |
| WA621             | <i>peralta</i>                | Koure, Niger                          |
| WA622             | <i>peralta</i>                | Koure, Niger                          |
| WA623             | <i>peralta</i>                | Koure, Niger                          |
| WA700             | <i>peralta</i>                | Koure, Niger                          |
| WA705             | <i>peralta</i>                | Koure, Niger                          |
| WA707             | <i>peralta</i>                | Koure, Niger                          |
| WA708             | <i>peralta</i>                | Koure, Niger                          |
| WA720             | <i>peralta</i>                | Koure, Niger                          |
| GNP01             | <i>antiquorum</i>             | Garamba National Park, DR Congo       |
| GNP02             | <i>antiquorum</i>             | Garamba National Park, DR Congo       |
| GNP03             | <i>antiquorum</i>             | Garamba National Park, DR Congo       |
| GNP04             | <i>antiquorum</i>             | Garamba National Park, DR Congo       |
| GNP05             | <i>antiquorum</i>             | Garamba National Park, DR Congo       |
| SNR1              | <i>antiquorum</i>             | Shambe National Park, South Sudan     |
| SNR2              | <i>antiquorum</i>             | Shambe National Park, South Sudan     |
| ZNP01             | <i>antiquorum</i>             | Zakouma National Park, Chad           |
| BaNP4             | <i>camelopardalis</i>         | Badingilo National Park, South Sudan  |
| ETH1              | <i>camelopardalis</i>         | Gambella National, Ethiopia           |
| ETH2              | <i>camelopardalis</i>         | Gambella National, Ethiopia           |
| ETH3              | <i>camelopardalis</i>         | Gambella National, Ethiopia           |
| MF01              | <i>rothschildi</i>            | Murchison Falls National Park, Uganda |
| MF02              | <i>rothschildi</i>            | Murchison Falls National Park, Uganda |
| MF03              | <i>rothschildi</i>            | Murchison Falls National Park, Uganda |
| MF04              | <i>rothschildi</i>            | Murchison Falls National Park, Uganda |
| MF05              | <i>rothschildi</i>            | Murchison Falls National Park, Uganda |
| MF06              | <i>rothschildi</i>            | Murchison Falls National Park, Uganda |
| MF07              | <i>rothschildi</i>            | Murchison Falls National Park, Uganda |
| MF09              | <i>rothschildi</i>            | Murchison Falls National Park, Uganda |
| MF11              | <i>rothschildi</i>            | Murchison Falls National Park, Uganda |
| MF13              | <i>rothschildi</i>            | Murchison Falls National Park, Uganda |
| MF14              | <i>rothschildi</i>            | Murchison Falls National Park, Uganda |
| MF15              | <i>rothschildi</i>            | Murchison Falls National Park, Uganda |
| MF16              | <i>rothschildi</i>            | Murchison Falls National Park, Uganda |
| MF17              | <i>rothschildi</i>            | Murchison Falls National Park, Uganda |
| MF24              | <i>rothschildi</i>            | Murchison Falls National Park, Uganda |

|                  |                      |                                      |
|------------------|----------------------|--------------------------------------|
| <b>RET1</b>      | <i>reticulata</i>    | Zoo                                  |
| <b>RET3</b>      | <i>reticulata</i>    | Zoo                                  |
| <b>RET4</b>      | <i>reticulata</i>    | Zoo                                  |
| <b>RET5</b>      | <i>reticulata</i>    | Zoo                                  |
| <b>RET6</b>      | <i>reticulata</i>    | Zoo                                  |
| <b>RETWil</b>    | <i>reticulata</i>    | Zoo                                  |
| <b>RETWil2</b>   | <i>reticulata</i>    | Zoo                                  |
| <b>RETRot1</b>   | <i>reticulata</i>    | Zoo                                  |
| <b>RETRot2</b>   | <i>reticulata</i>    | Zoo                                  |
| <b>RETRot3</b>   | <i>reticulata</i>    | Zoo                                  |
| <b>ISC03</b>     | <i>reticulata</i>    | Ishqbini Conservancy, Kenya          |
| <b>ISC04</b>     | <i>reticulata</i>    | Ishqbini Conservancy, Kenya          |
| <b>ISC08</b>     | <i>reticulata</i>    | Ishqbini Conservancy, Kenya          |
| <b>LWC01</b>     | <i>reticulata</i>    | Loisaba Wildlife Conservancy, Kenya  |
| <b>LVNP8_18</b>  | <i>thornicrofti</i>  | Luangwa Valley National Park, Zambia |
| <b>LVNP8_19</b>  | <i>thornicrofti</i>  | Luangwa Valley National Park, Zambia |
| <b>LVNP8_20</b>  | <i>thornicrofti</i>  | Luangwa Valley National Park, Zambia |
| <b>LVNP8_21</b>  | <i>thornicrofti</i>  | Luangwa Valley National Park, Zambia |
| <b>LVNP8_22</b>  | <i>thornicrofti</i>  | Luangwa Valley National Park, Zambia |
| <b>LVNP8_23a</b> | <i>thornicrofti</i>  | Luangwa Valley National Park, Zambia |
| <b>LVNP8_31</b>  | <i>thornicrofti</i>  | Luangwa Valley National Park, Zambia |
| <b>LVNP8_32</b>  | <i>thornicrofti</i>  | Luangwa Valley National Park, Zambia |
| <b>LVNP8_33</b>  | <i>thornicrofti</i>  | Luangwa Valley National Park, Zambia |
| <b>LVNP8_34</b>  | <i>thornicrofti</i>  | Luangwa Valley National Park, Zambia |
| <b>LVNP8_35</b>  | <i>thornicrofti</i>  | Luangwa Valley National Park, Zambia |
| <b>LVNP8_36</b>  | <i>thornicrofti</i>  | Luangwa Valley National Park, Zambia |
| <b>SGR01</b>     | <i>tippelskirchi</i> | Selous Game Reserve, Tanzania        |
| <b>SGR05</b>     | <i>tippelskirchi</i> | Selous Game Reserve, Tanzania        |
| <b>SGR06</b>     | <i>tippelskirchi</i> | Selous Game Reserve, Tanzania        |
| <b>SGR07</b>     | <i>tippelskirchi</i> | Selous Game Reserve, Tanzania        |
| <b>SGR12</b>     | <i>tippelskirchi</i> | Selous Game Reserve, Tanzania        |
| <b>SGR13</b>     | <i>tippelskirchi</i> | Selous Game Reserve, Tanzania        |
| <b>SGR14</b>     | <i>tippelskirchi</i> | Selous Game Reserve, Tanzania        |
| <b>MTNP1</b>     | <i>giraffa</i>       | Mosi-oa-Tunya National Park, Zambia  |
| <b>MTNP2</b>     | <i>giraffa</i>       | Mosi-oa-Tunya National Park, Zambia  |
| <b>MTNP3</b>     | <i>giraffa</i>       | Mosi-oa-Tunya National Park, Zambia  |
| <b>SNNP</b>      | <i>giraffa</i>       | Sioma Ngwezi NP, Zambia              |
| <b>BNP01</b>     | <i>giraffa</i>       | Bwabwata National Park, Namibia      |
| <b>BNP02</b>     | <i>giraffa</i>       | Bwabwata National Park, Namibia      |
| <b>BNP03</b>     | <i>giraffa</i>       | Bwabwata National Park, Namibia      |
| <b>BNP04</b>     | <i>giraffa</i>       | Bwabwata National Park, Namibia      |
| <b>BNP05</b>     | <i>giraffa</i>       | Bwabwata National Park, Namibia      |
| <b>BNP06</b>     | <i>giraffa</i>       | Bwabwata National Park, Namibia      |
| <b>BNP09</b>     | <i>giraffa</i>       | Bwabwata National Park, Namibia      |
| <b>CNP9_01</b>   | <i>giraffa</i>       | Chobe National Park, Botswana        |
| <b>CNP9_02</b>   | <i>giraffa</i>       | Chobe National Park, Botswana        |
| <b>CNP9_03</b>   | <i>giraffa</i>       | Chobe National Park, Botswana        |

|                 |                   |                                         |
|-----------------|-------------------|-----------------------------------------|
| <b>KKR01</b>    | <i>giraffa</i>    | Khamab Kalahari Reserve, South Africa   |
| <b>KKR02</b>    | <i>giraffa</i>    | Khamab Kalahari Reserve, South Africa   |
| <b>KKR03</b>    | <i>giraffa</i>    | Khamab Kalahari Reserve, South Africa   |
| <b>KKR04</b>    | <i>giraffa</i>    | Khamab Kalahari Reserve, South Africa   |
| <b>KKR05</b>    | <i>giraffa</i>    | Khamab Kalahari Reserve, South Africa   |
| <b>KKR07</b>    | <i>giraffa</i>    | Khamab Kalahari Reserve, South Africa   |
| <b>KKR08</b>    | <i>giraffa</i>    | Khamab Kalahari Reserve, South Africa   |
| <b>MGR9_01</b>  | <i>giraffa</i>    | Moremi Game Reserve, Botswana           |
| <b>MGR9_02</b>  | <i>giraffa</i>    | Moremi Game Reserve, Botswana           |
| <b>MGR9_03</b>  | <i>giraffa</i>    | Moremi Game Reserve, Botswana           |
| <b>MGR9_04</b>  | <i>giraffa</i>    | Moremi Game Reserve, Botswana           |
| <b>MGR9_05</b>  | <i>giraffa</i>    | Moremi Game Reserve, Botswana           |
| <b>SUN1</b>     | <i>giraffa</i>    | Sun hotel, Livingstone, Zambia          |
| <b>SUN2</b>     | <i>giraffa</i>    | Sun hotel, Livingstone, Zambia          |
| <b>SUN3</b>     | <i>giraffa</i>    | Sun hotel, Livingstone, Zambia          |
| <b>SUN4</b>     | <i>giraffa</i>    | Sun hotel, Livingstone, Zambia          |
| <b>V23</b>      | <i>giraffa</i>    | Vumbura Concession, Botswana            |
| <b>V24</b>      | <i>giraffa</i>    | Vumbura Concession, Botswana            |
| <b>V25</b>      | <i>giraffa</i>    | Vumbura Concession, Botswana            |
| <b>V26</b>      | <i>giraffa</i>    | Vumbura Concession, Botswana            |
| <b>V27</b>      | <i>giraffa</i>    | Vumbura Concession, Botswana            |
| <b>V28</b>      | <i>giraffa</i>    | Vumbura Concession, Botswana            |
| <b>V29</b>      | <i>giraffa</i>    | Vumbura Concession, Botswana            |
| <b>V30</b>      | <i>giraffa</i>    | Vumbura Concession, Botswana            |
| <b>V31</b>      | <i>giraffa</i>    | Vumbura Concession, Botswana            |
| <b>V36</b>      | <i>giraffa</i>    | Vumbura Concession, Botswana            |
| <b>V37</b>      | <i>giraffa</i>    | Vumbura Concession, Botswana            |
| <b>V38</b>      | <i>giraffa</i>    | Vumbura Concession, Botswana            |
| <b>V39</b>      | <i>giraffa</i>    | Vumbura Concession, Botswana            |
| <b>CKGR9_01</b> | <i>angolensis</i> | Central Kalahari Game Reserve, Botswana |
| <b>CKGR9_02</b> | <i>angolensis</i> | Central Kalahari Game Reserve, Botswana |
| <b>CKGR9_03</b> | <i>angolensis</i> | Central Kalahari Game Reserve, Botswana |
| <b>CKGR9_05</b> | <i>angolensis</i> | Central Kalahari Game Reserve, Botswana |
| <b>ENP04</b>    | <i>angolensis</i> | Etosha National Park, Namibia           |
| <b>ENP07</b>    | <i>angolensis</i> | Etosha National Park, Namibia           |
| <b>ENP08</b>    | <i>angolensis</i> | Etosha National Park, Namibia           |
| <b>ENP09</b>    | <i>angolensis</i> | Etosha National Park, Namibia           |
| <b>ENP11</b>    | <i>angolensis</i> | Etosha National Park, Namibia           |
| <b>ENP12</b>    | <i>angolensis</i> | Etosha National Park, Namibia           |
| <b>ENP14</b>    | <i>angolensis</i> | Etosha National Park, Namibia           |
| <b>ENP15</b>    | <i>angolensis</i> | Etosha National Park, Namibia           |
| <b>ENP16</b>    | <i>angolensis</i> | Etosha National Park, Namibia           |
| <b>ENP17</b>    | <i>angolensis</i> | Etosha National Park, Namibia           |
| <b>ENP18</b>    | <i>angolensis</i> | Etosha National Park, Namibia           |
| <b>ENP19</b>    | <i>angolensis</i> | Etosha National Park, Namibia           |
| <b>ENP20</b>    | <i>angolensis</i> | Etosha National Park, Namibia           |
| <b>ENP21</b>    | <i>angolensis</i> | Etosha National Park, Namibia           |

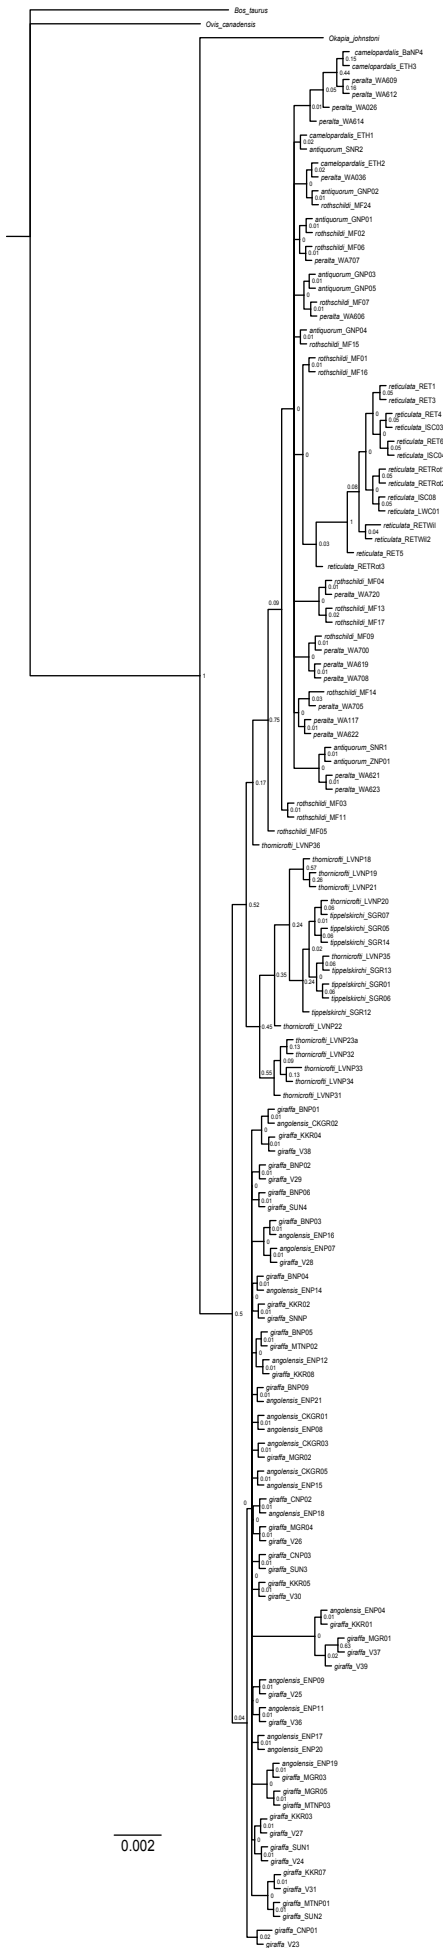

**Fig D.** Bayesian tree for the separate analysis of the 641 nucleotides (nt) long intron *ACP5* with the posterior probability values indicated for each node.

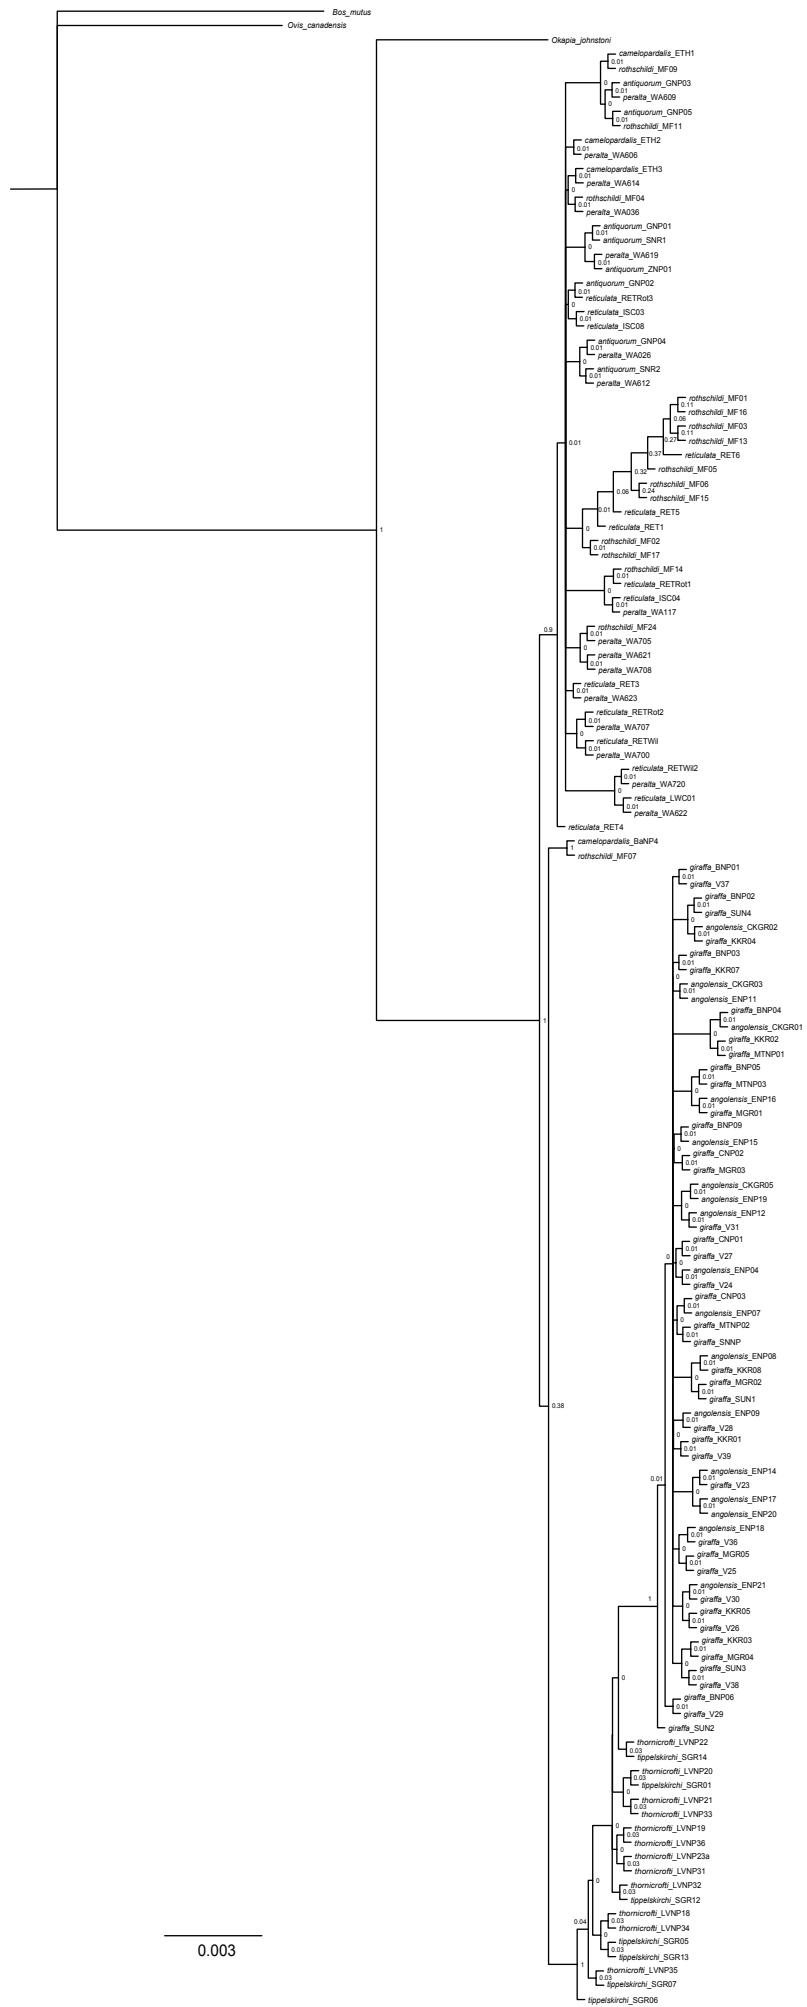

**Fig E.** Bayesian tree for the separate analysis of the 897 nucleotides (nt) long intron *Clorf74* with the posterior probability values indicated for each node.

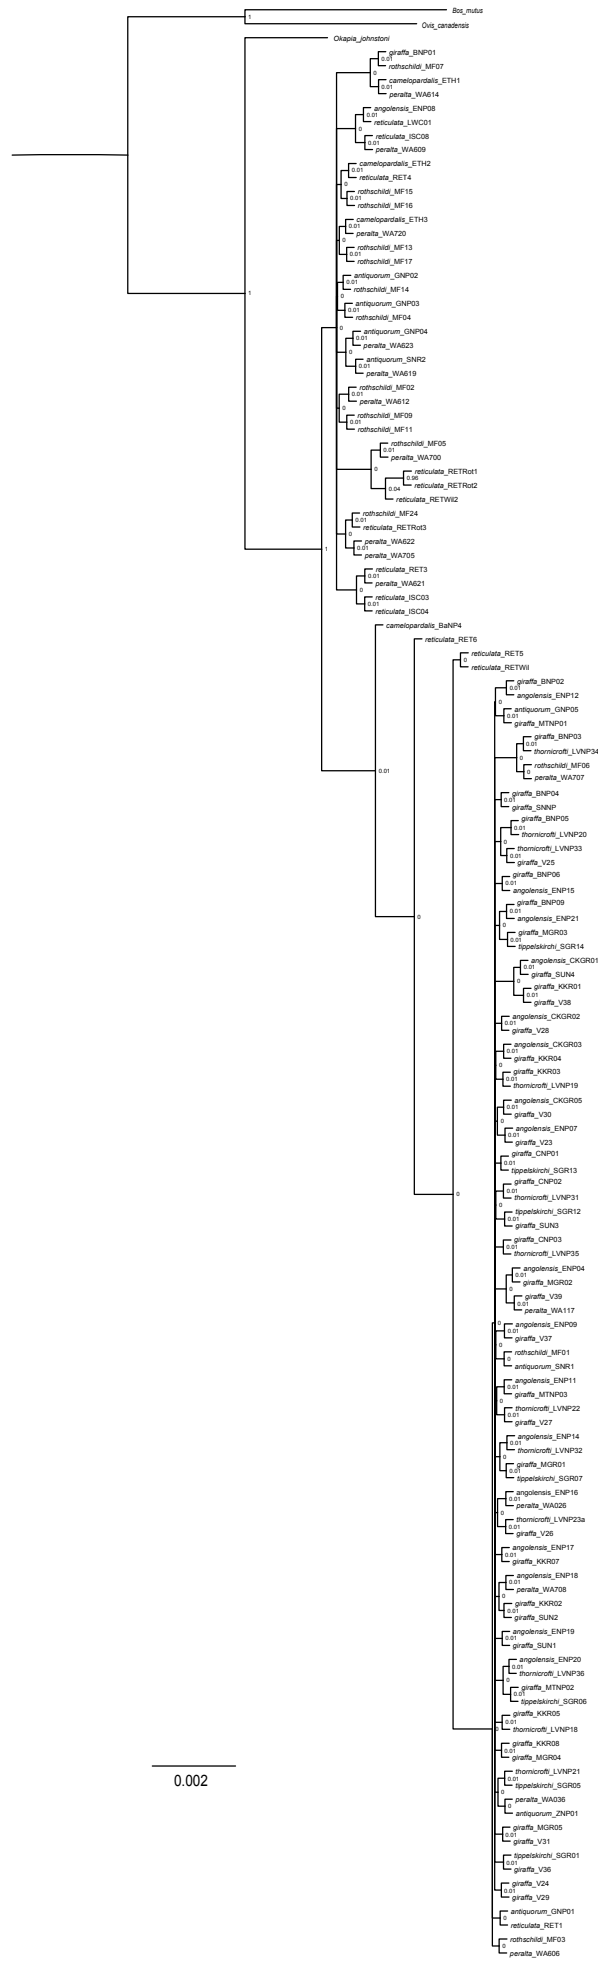

**Fig F.** Bayesian tree for the separate analysis of the 826 nucleotides (nt) long intron *CCT2* with the posterior probability values indicated for each node.

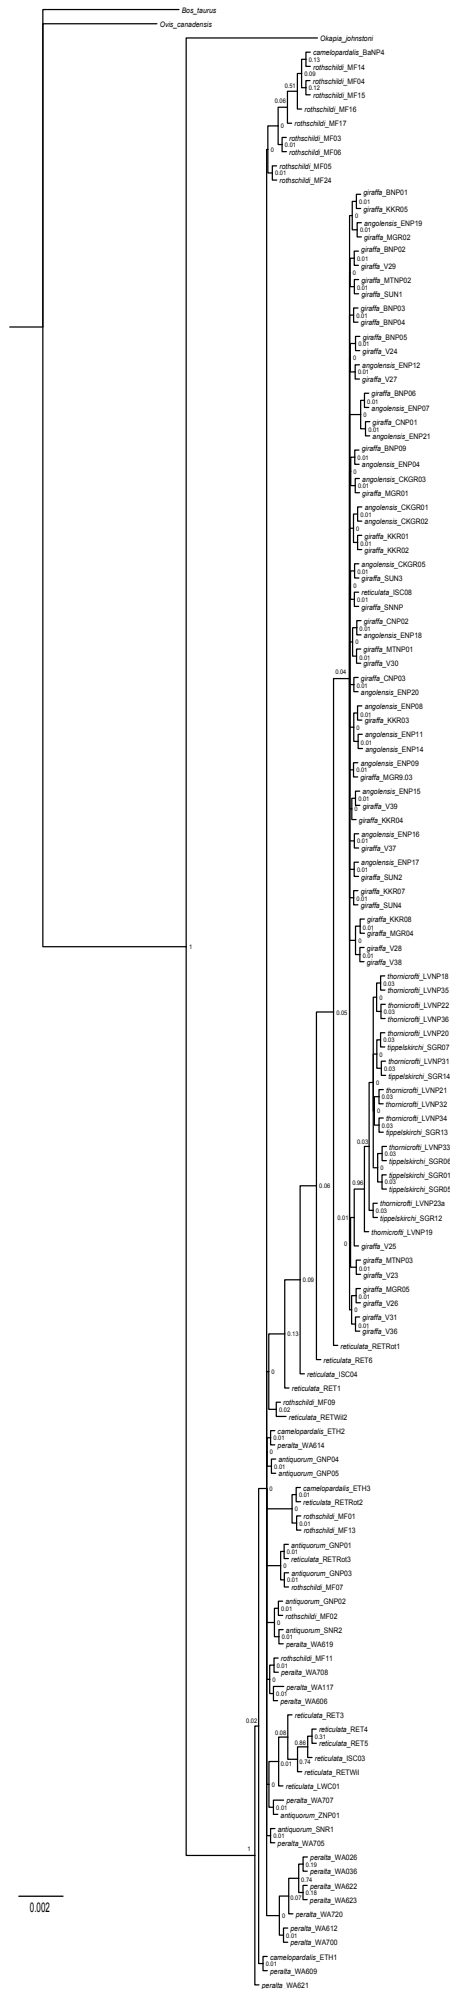

**Fig G.** Bayesian tree for the separate analysis of the 881 nucleotides (nt) long intron *COL5A2* with the posterior probability values indicated for each node.



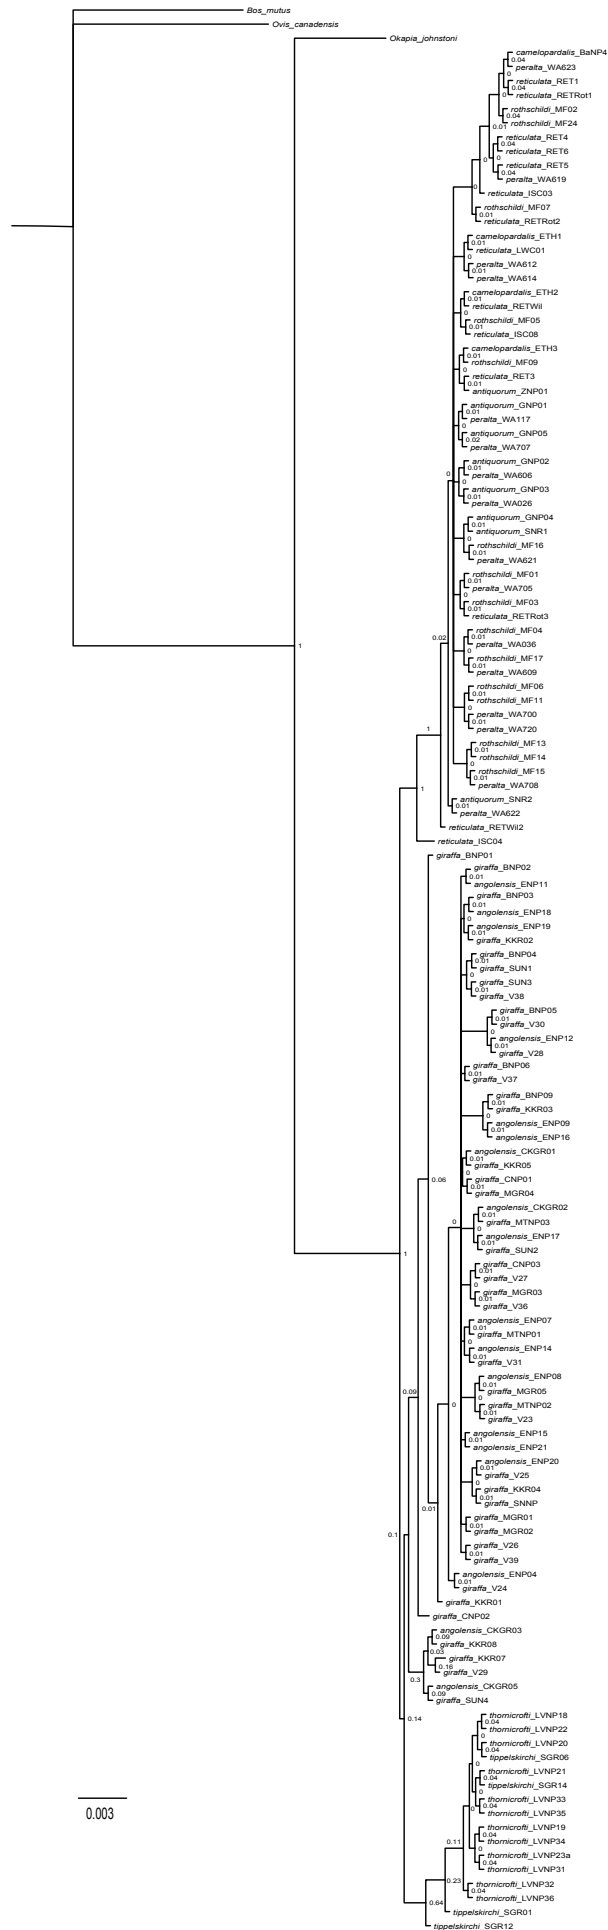

**Fig H.** Bayesian tree for the separate analysis of the 862 nucleotides (nt) long intron *CTAGE5* with the posterior probability values indicated for each node.

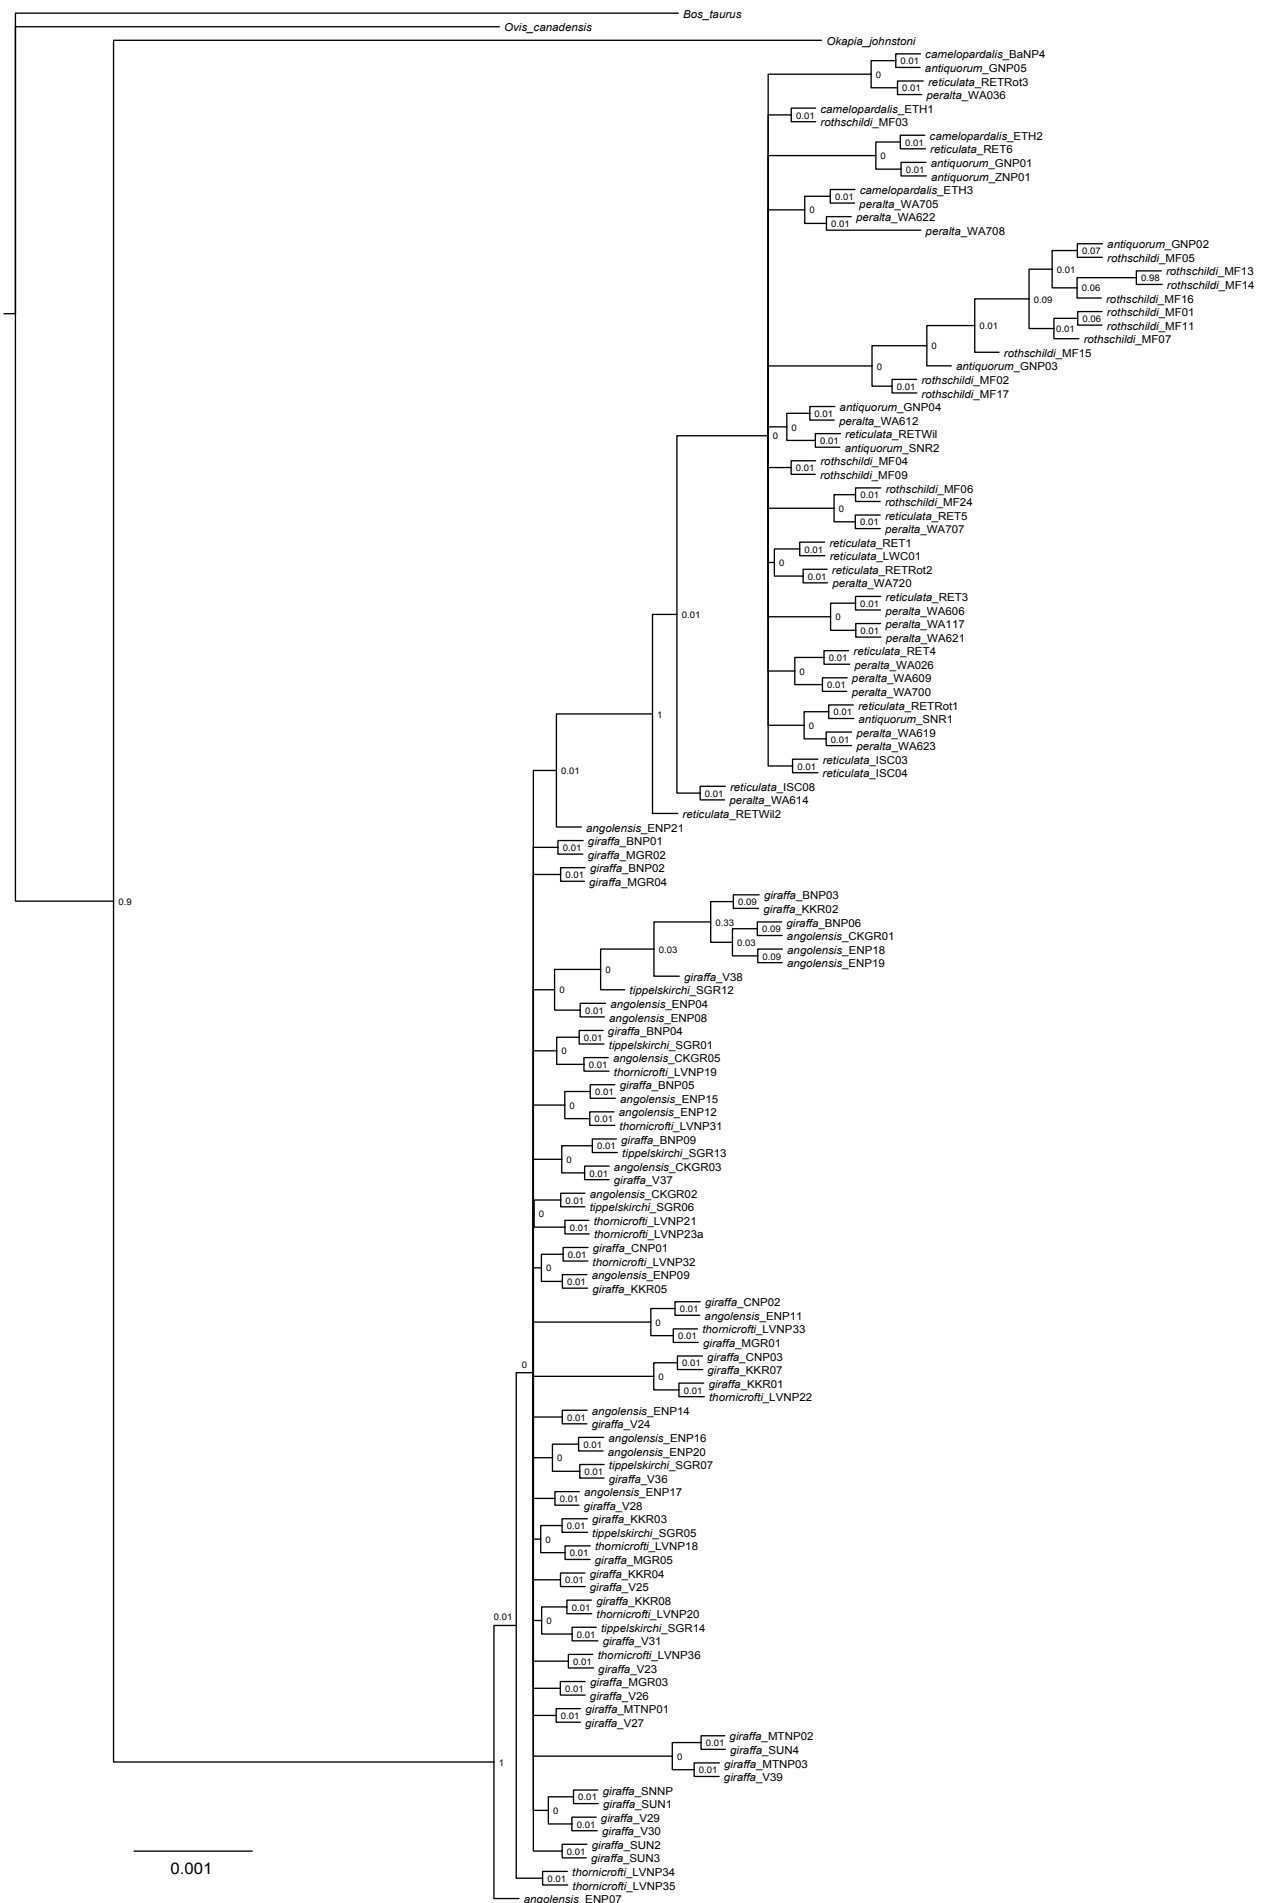

**Fig I.** Bayesian tree for the separate analysis of the 703 nucleotides (nt) long intron *CWF19L1* with the posterior probability values indicated for each node.

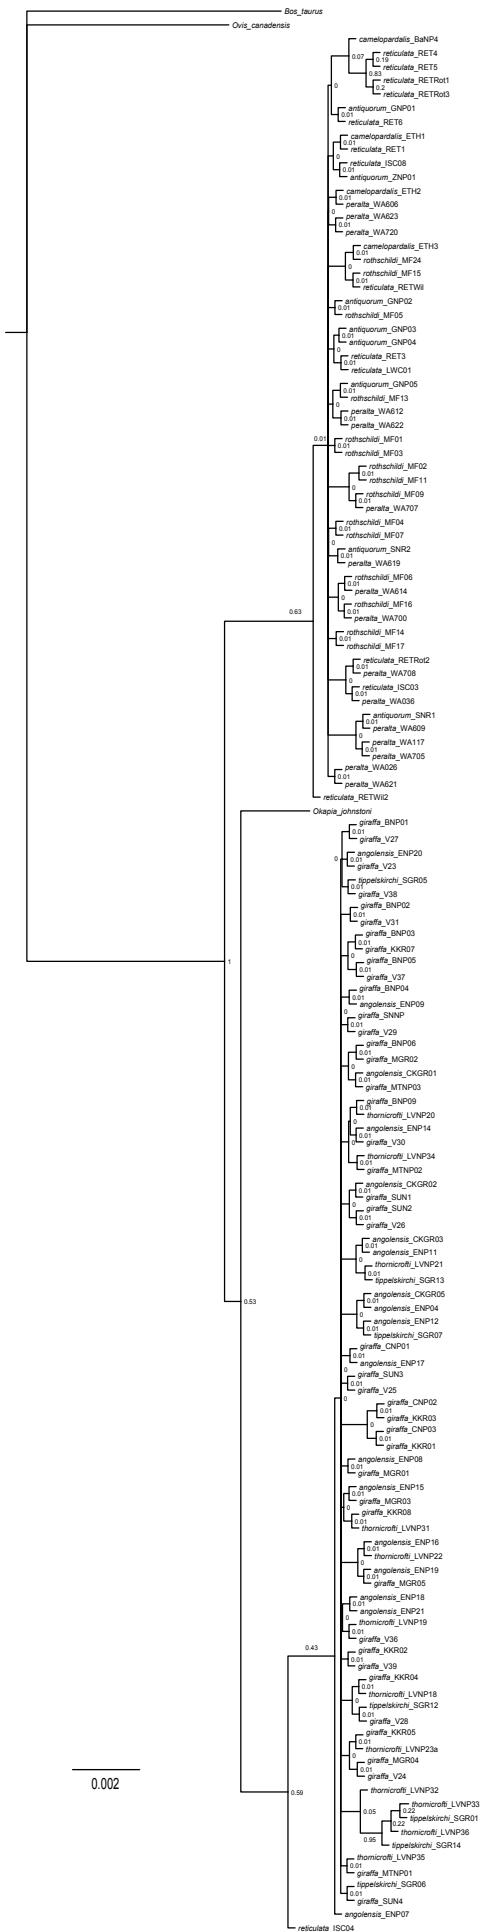

**Fig J.** Bayesian tree for the separate analysis of the 740 nucleotides (nt) long intron *DDX1* with the posterior probability values indicated for each node.

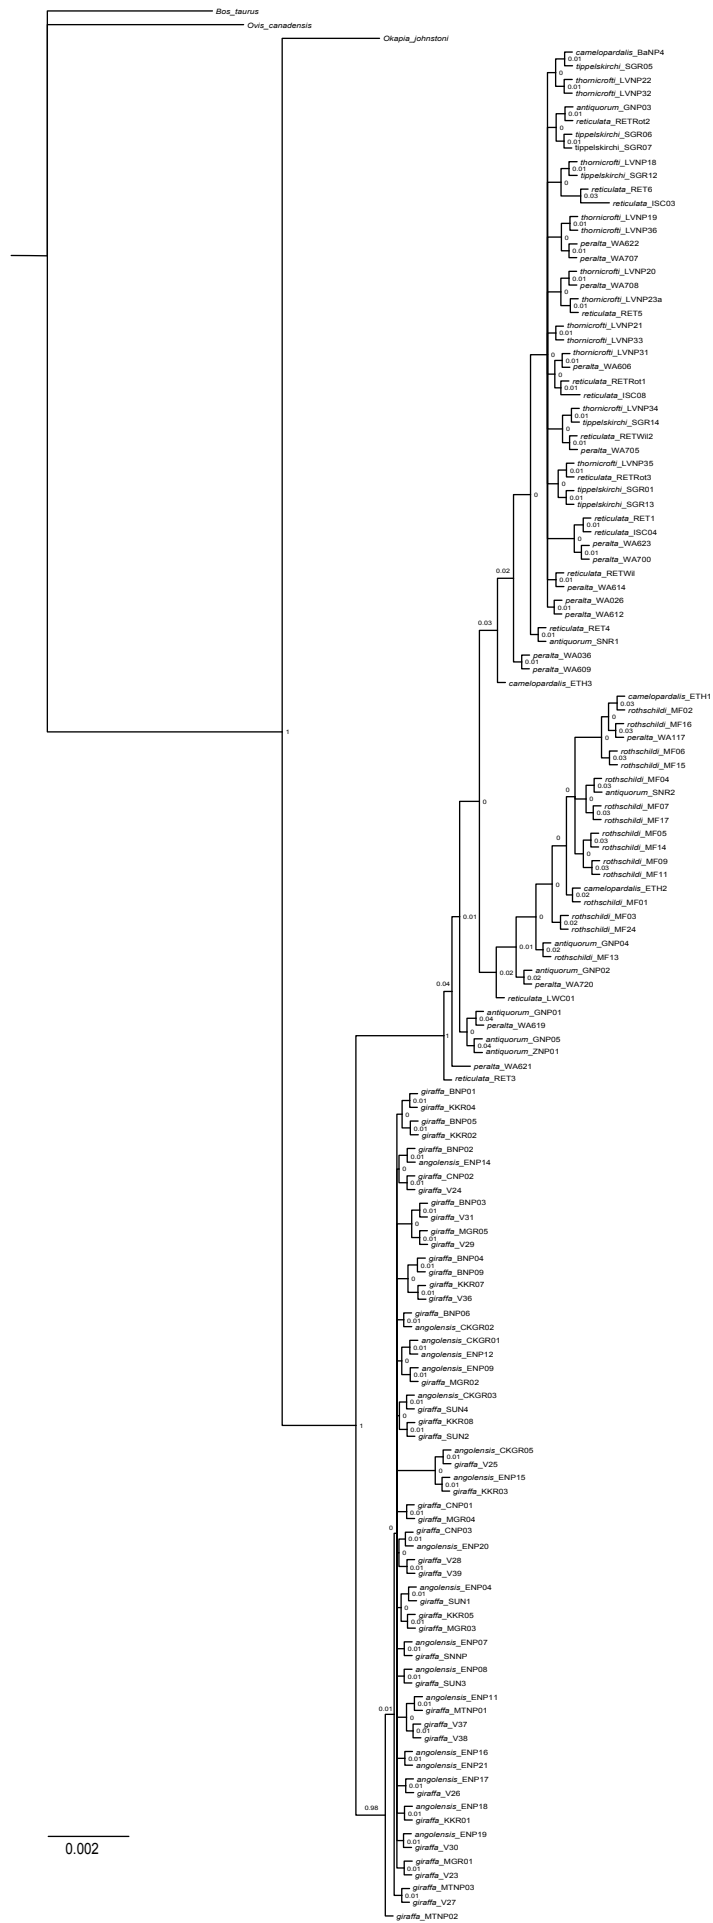

**Fig K.** Bayesian tree for the separate analysis of the 821 nucleotides (nt) long intron *DHX36* with the posterior probability values indicated for each node.

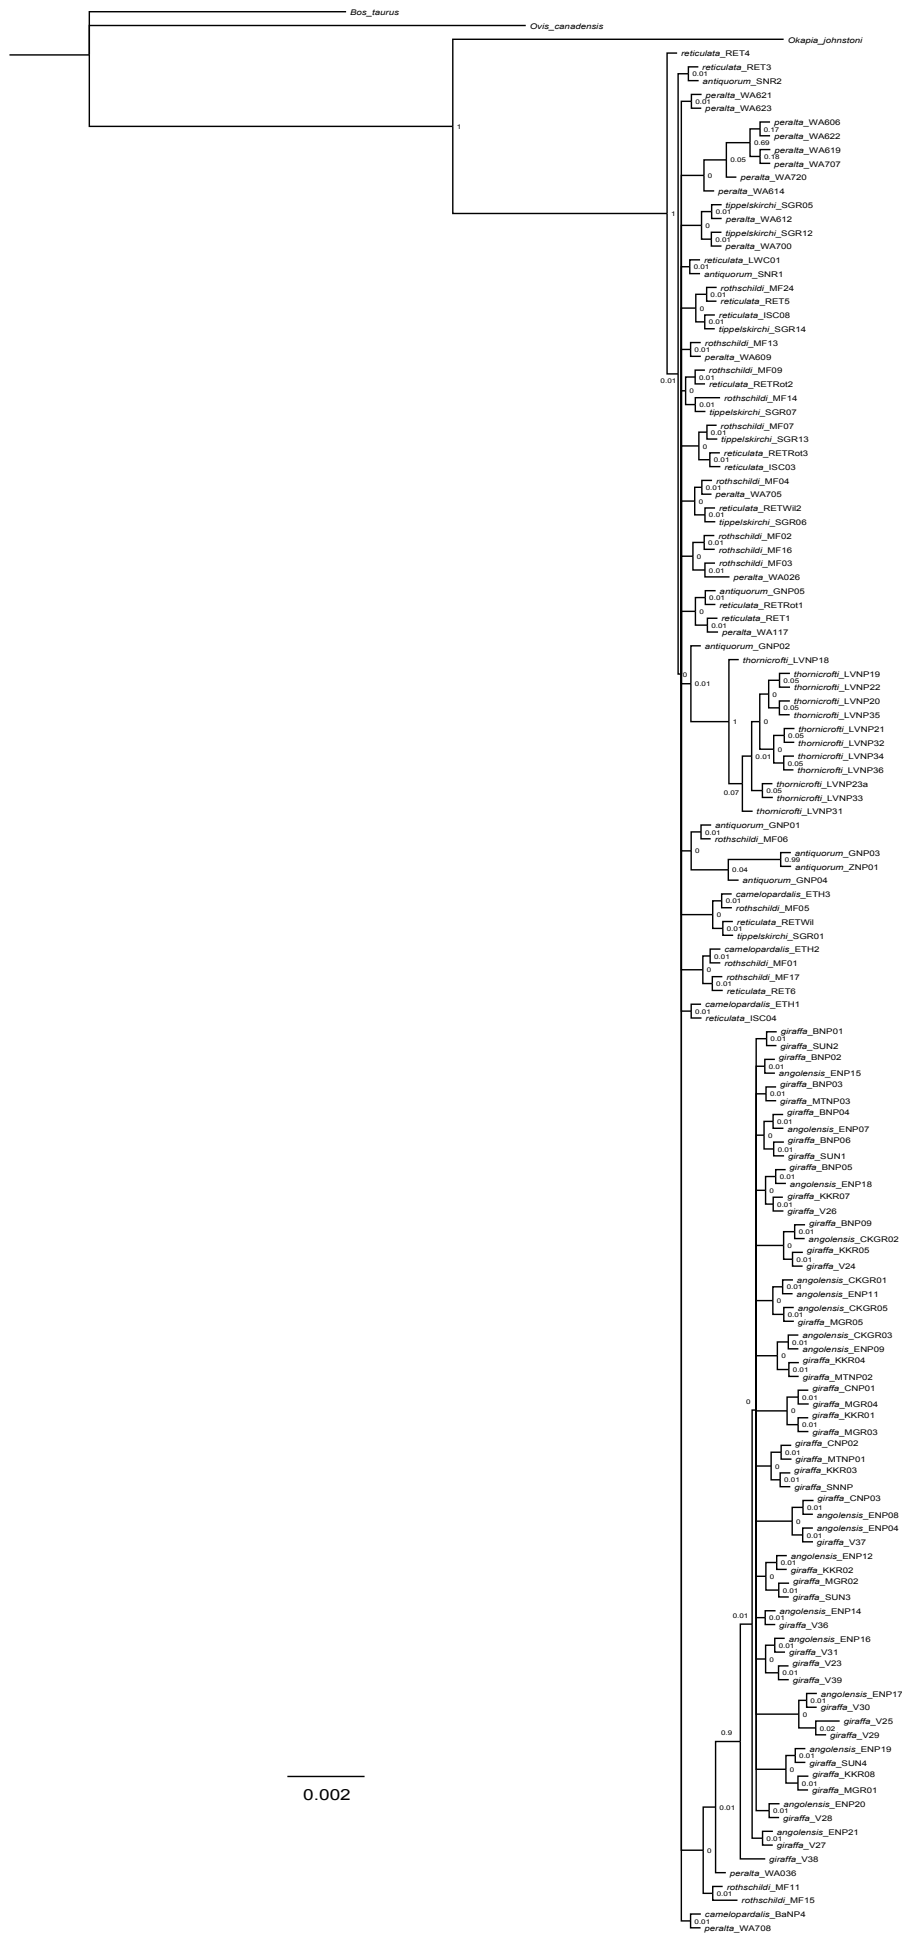

**Fig L.** Bayesian tree for the separate analysis of the 820 nucleotides (nt) long intron *IGF2B1* with the posterior probability values indicated for each node.

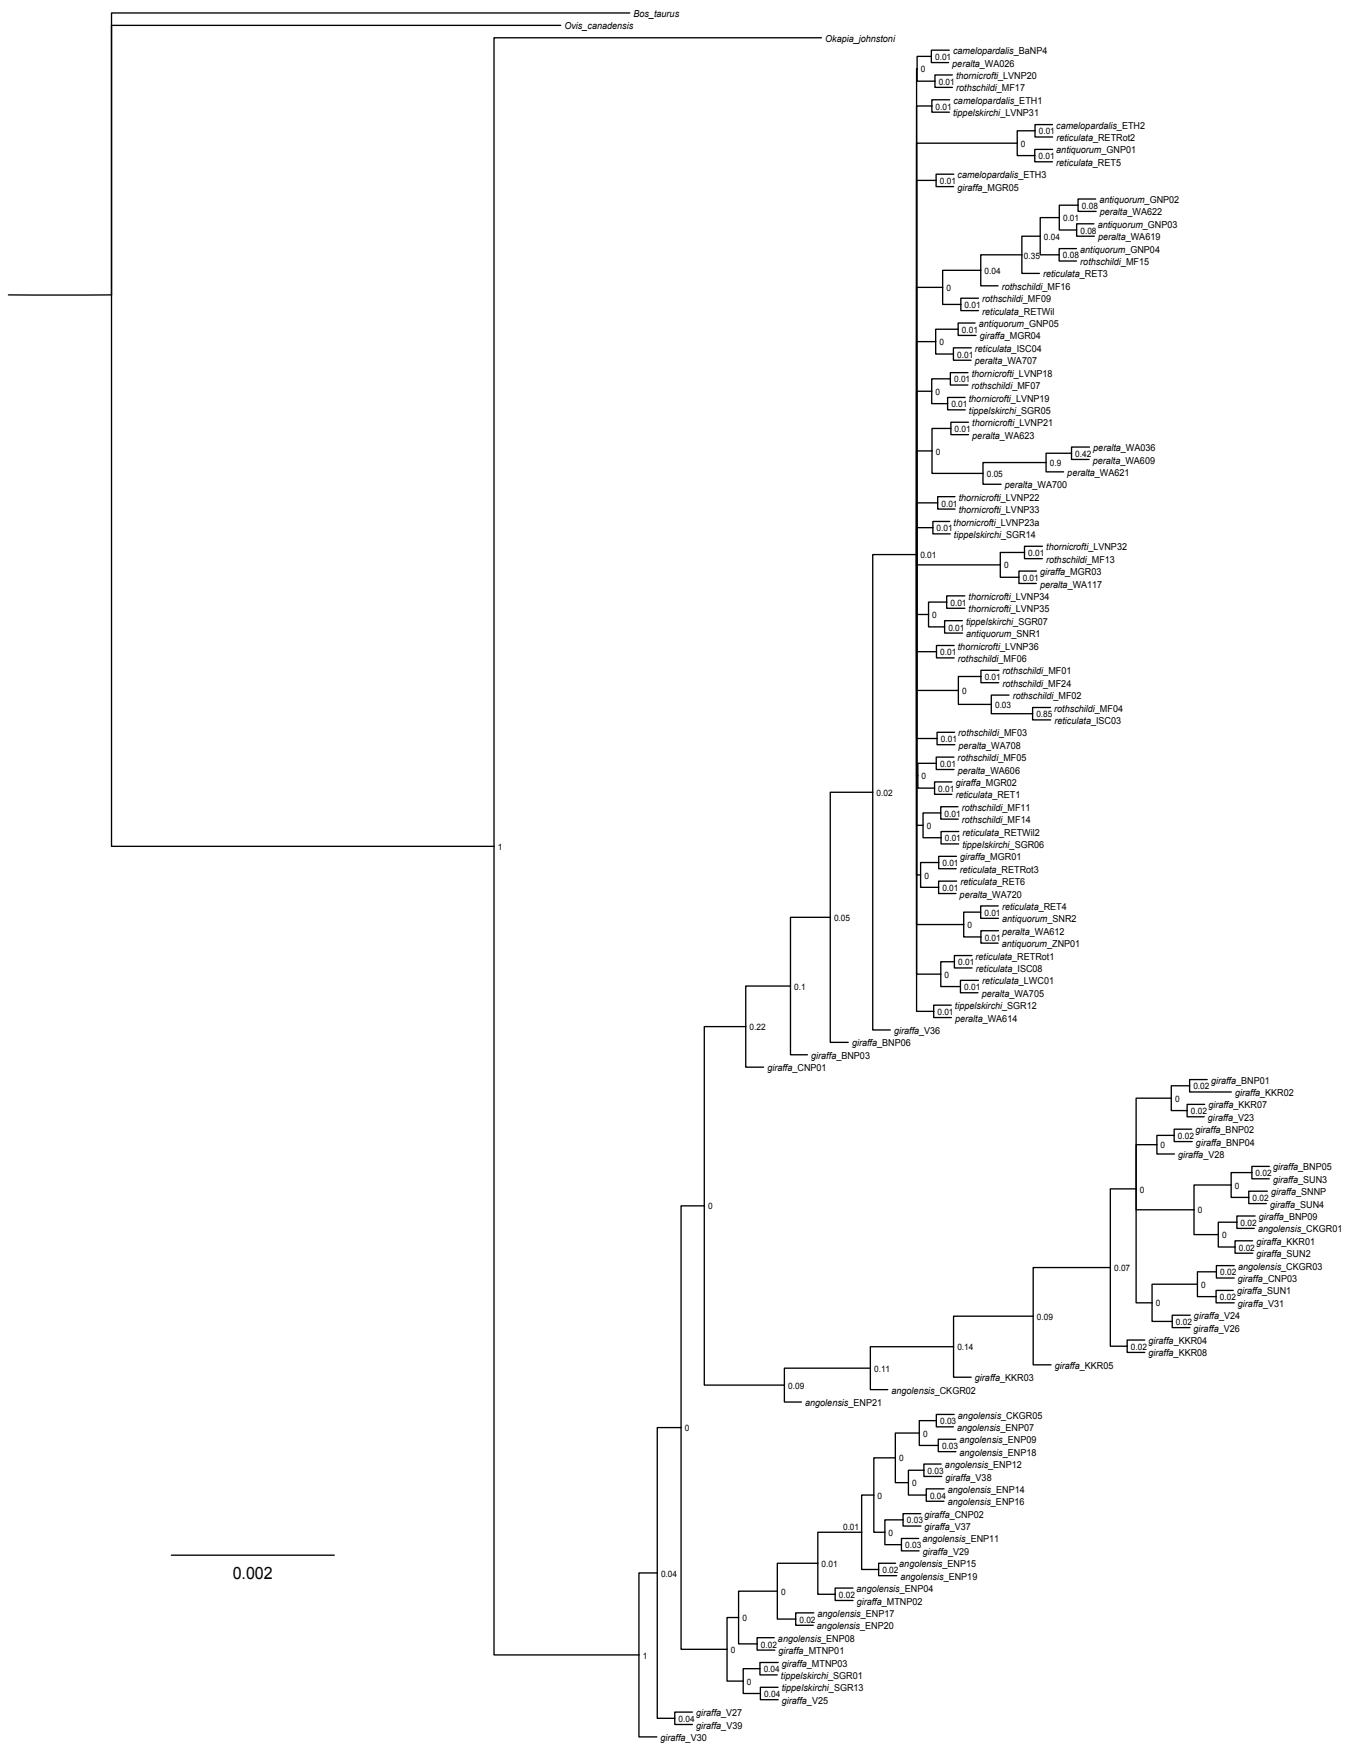

**Fig M.** Bayesian tree for the separate analysis of the 719 nucleotides (nt) long intron *MACF1* with the posterior probability values indicated for each node.

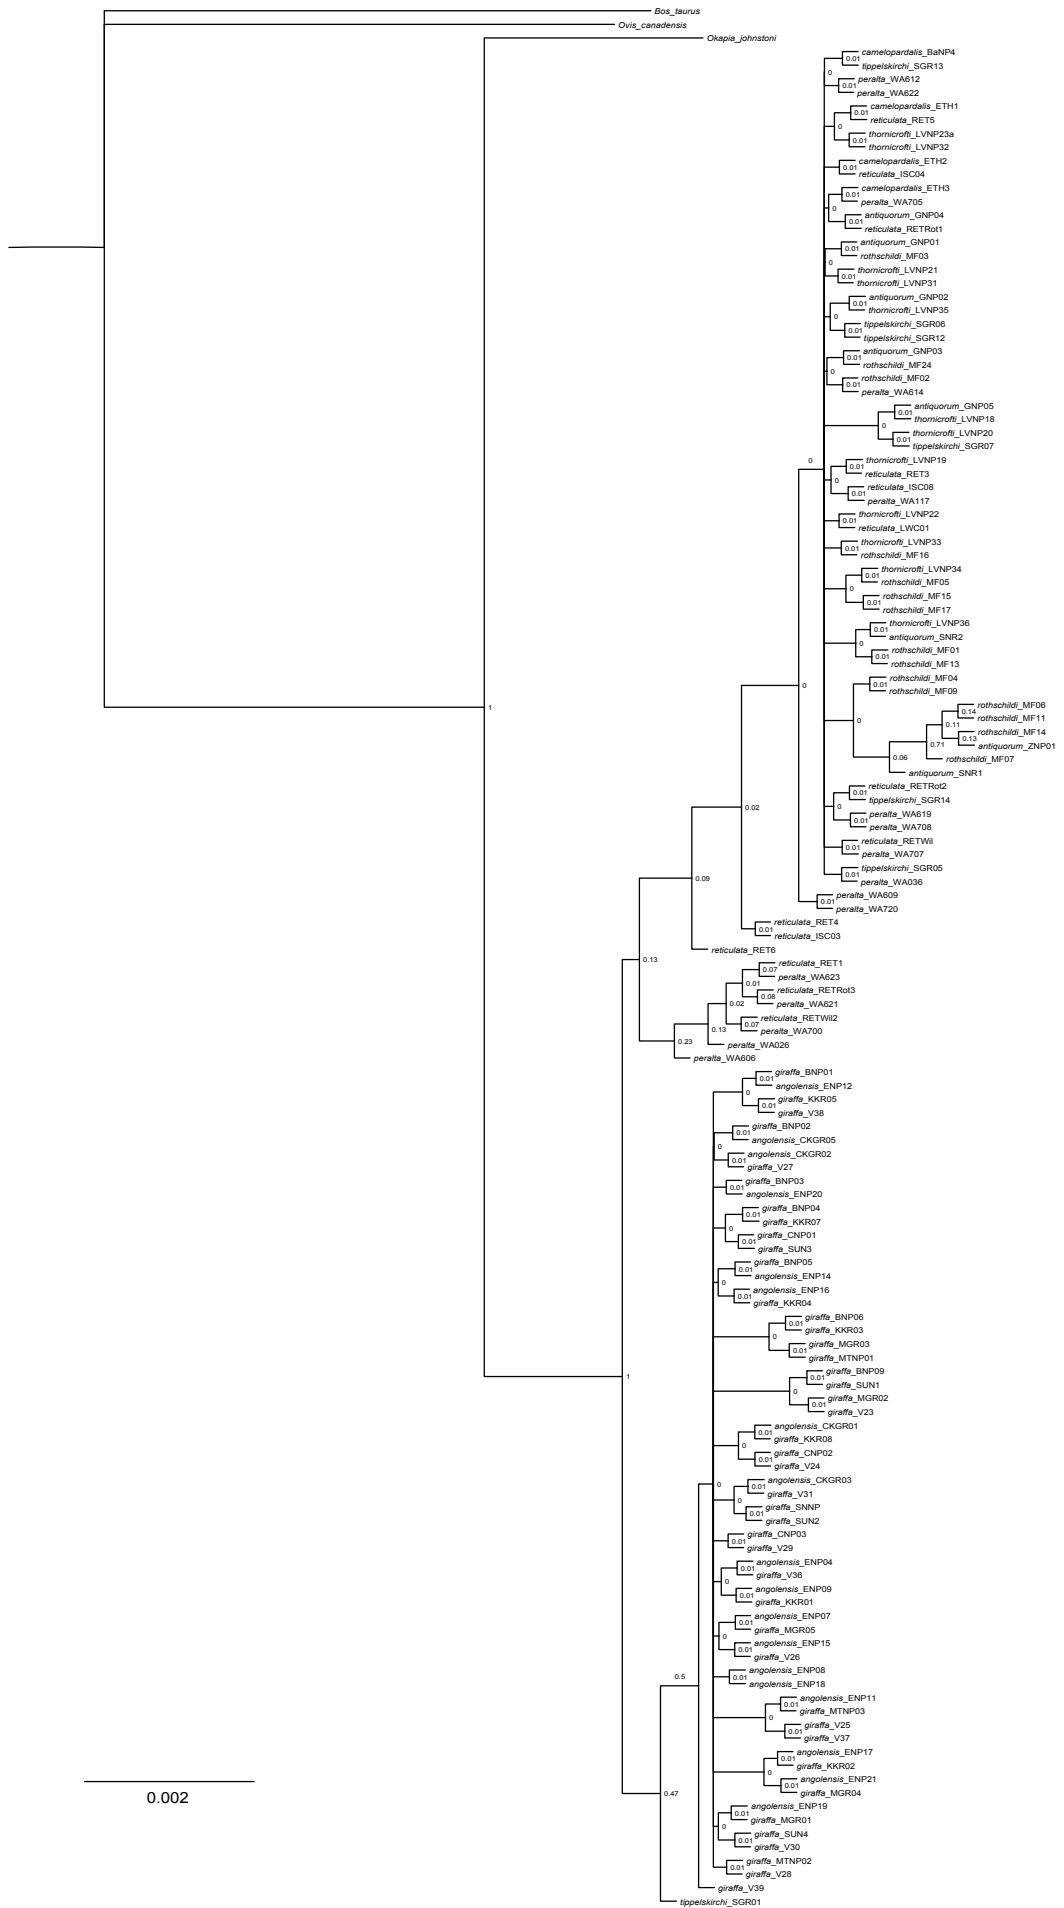

**Fig N.** Bayesian tree for the separate analysis of the 885 nucleotides (nt) long intron *NOTCH2* with the posterior probability values indicated for each node.

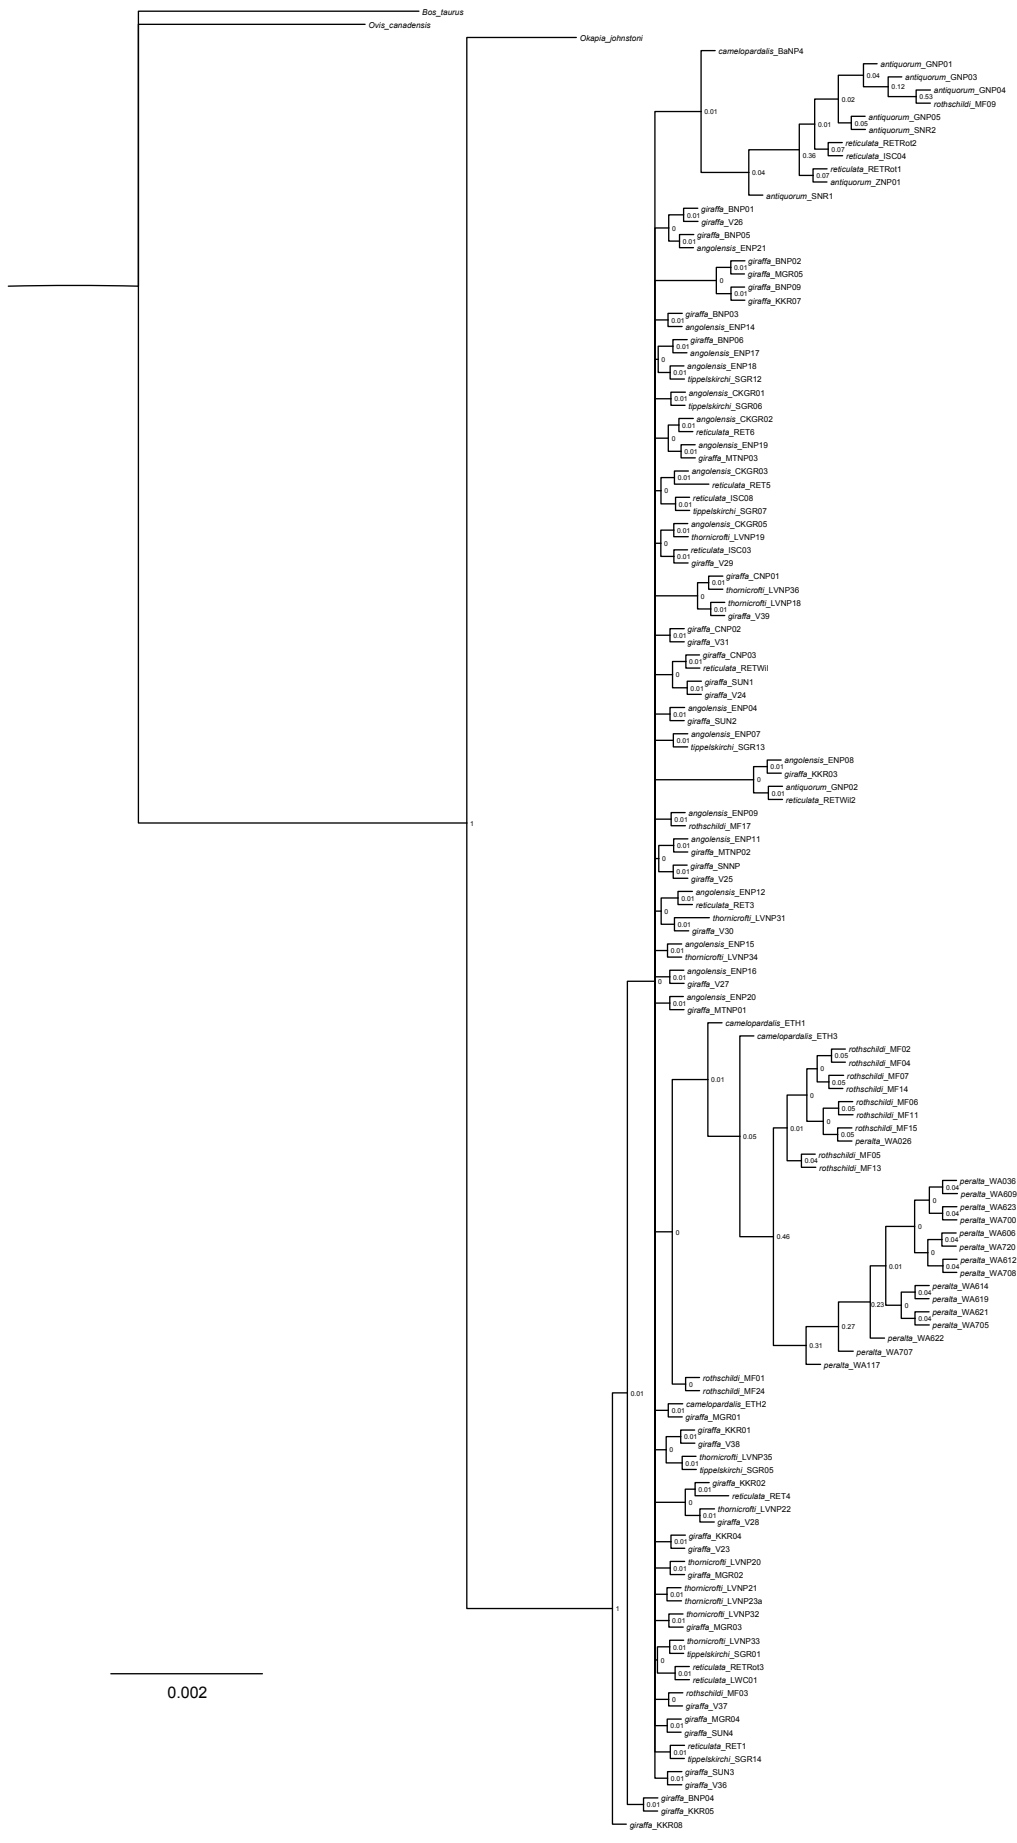

**Fig O.** Bayesian tree for the separate analysis of the 658 nucleotides (nt) long intron *NUP155* with the posterior probability values indicated for each node.



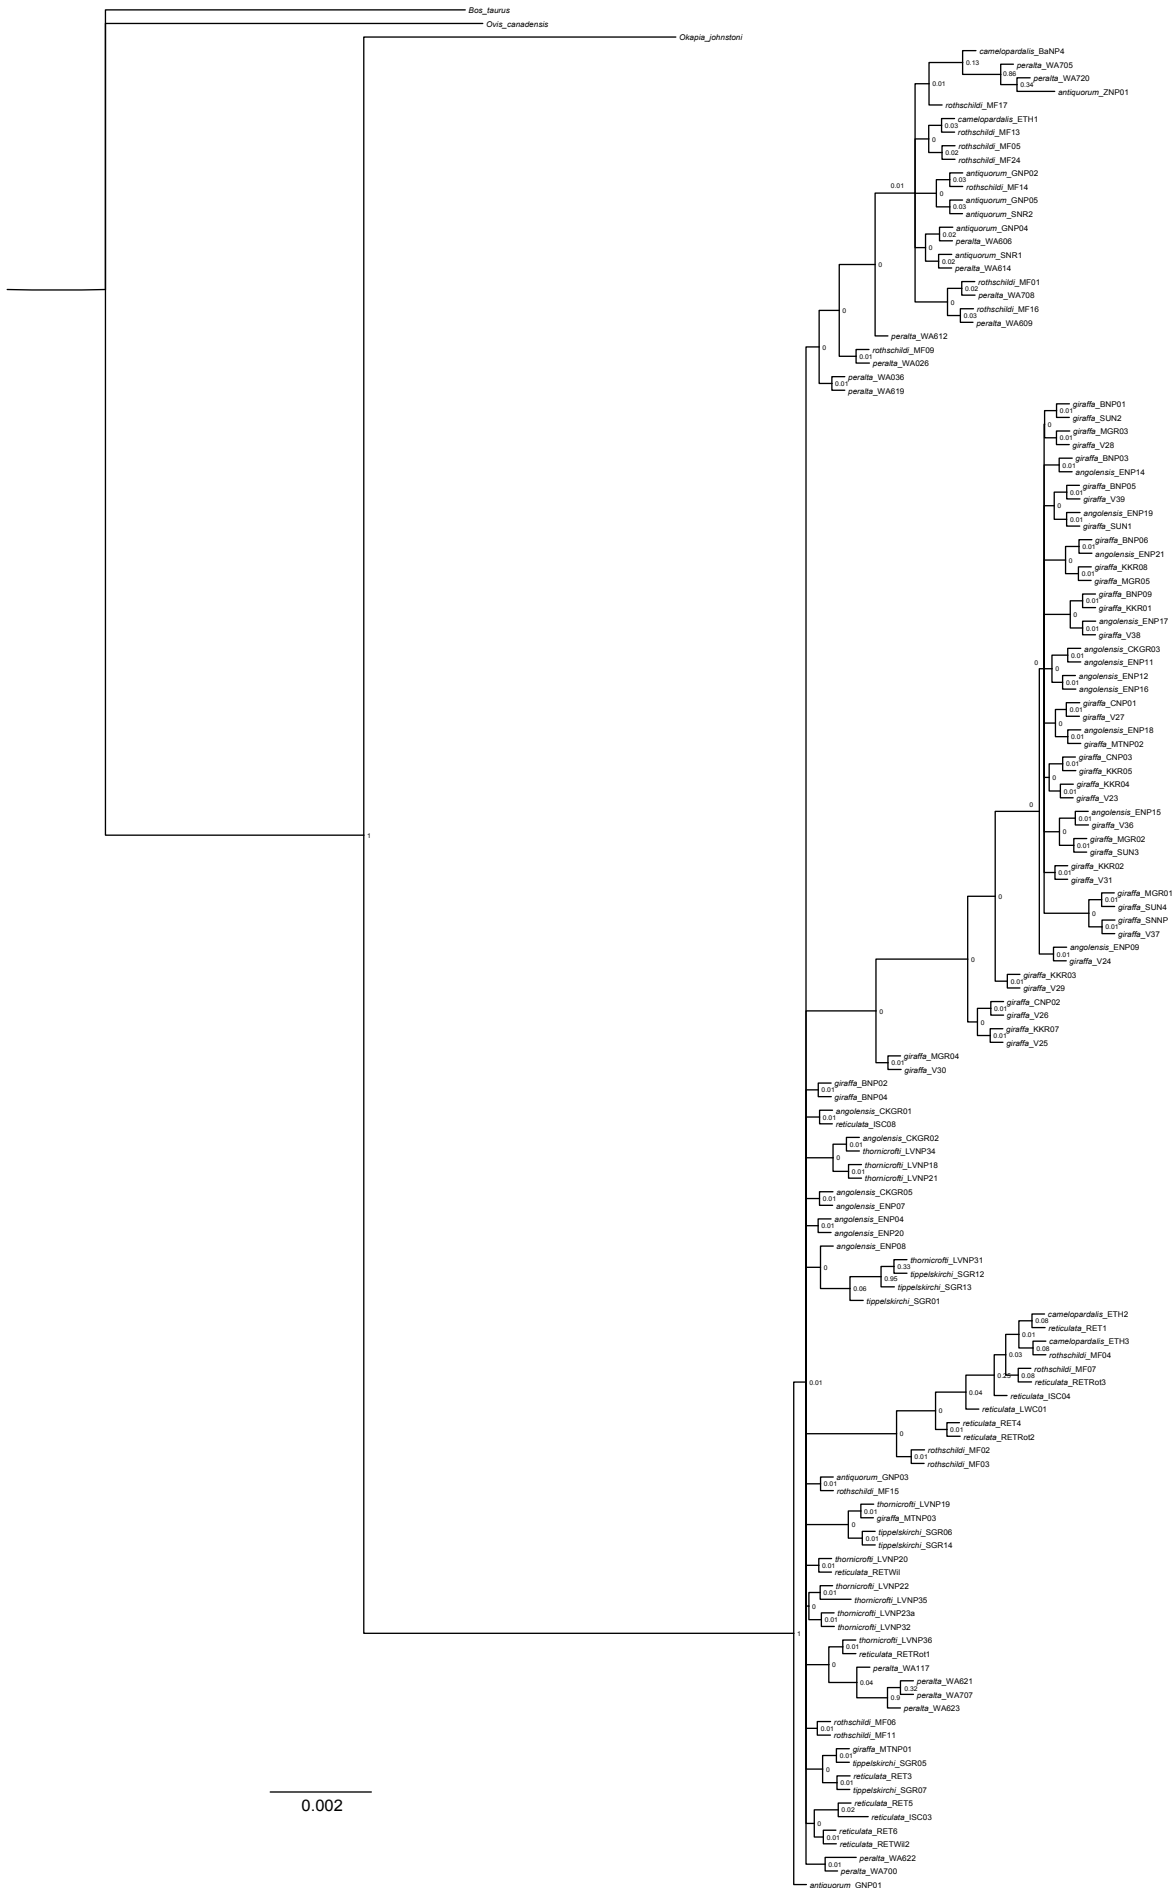

**Fig P.** Bayesian tree for the separate analysis of the 756 nucleotides (nt) long intron *OTOF* with the posterior probability values indicated for each node.

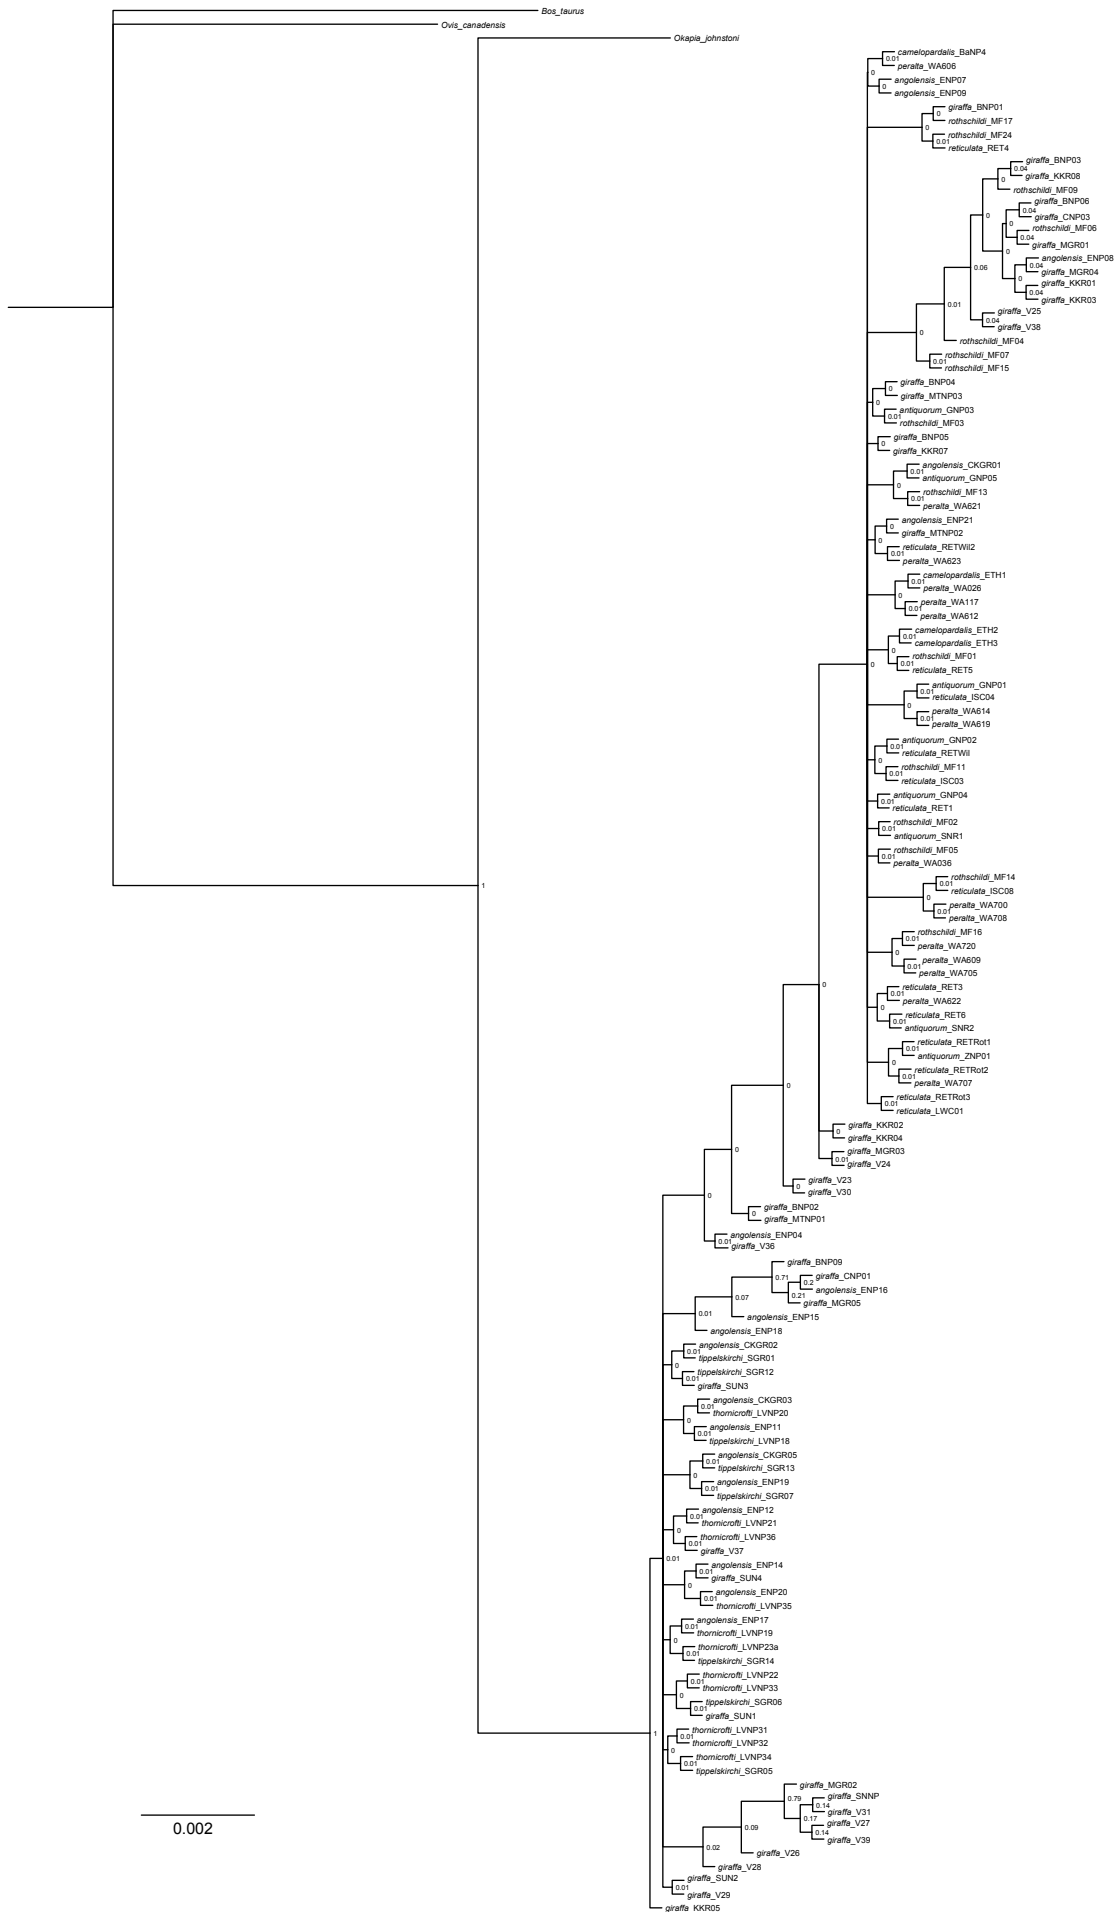

**Fig Q.** Bayesian tree for the separate analysis of the 897 nucleotides (nt) long intron *PLCE1* with the posterior probability values indicated for each node.

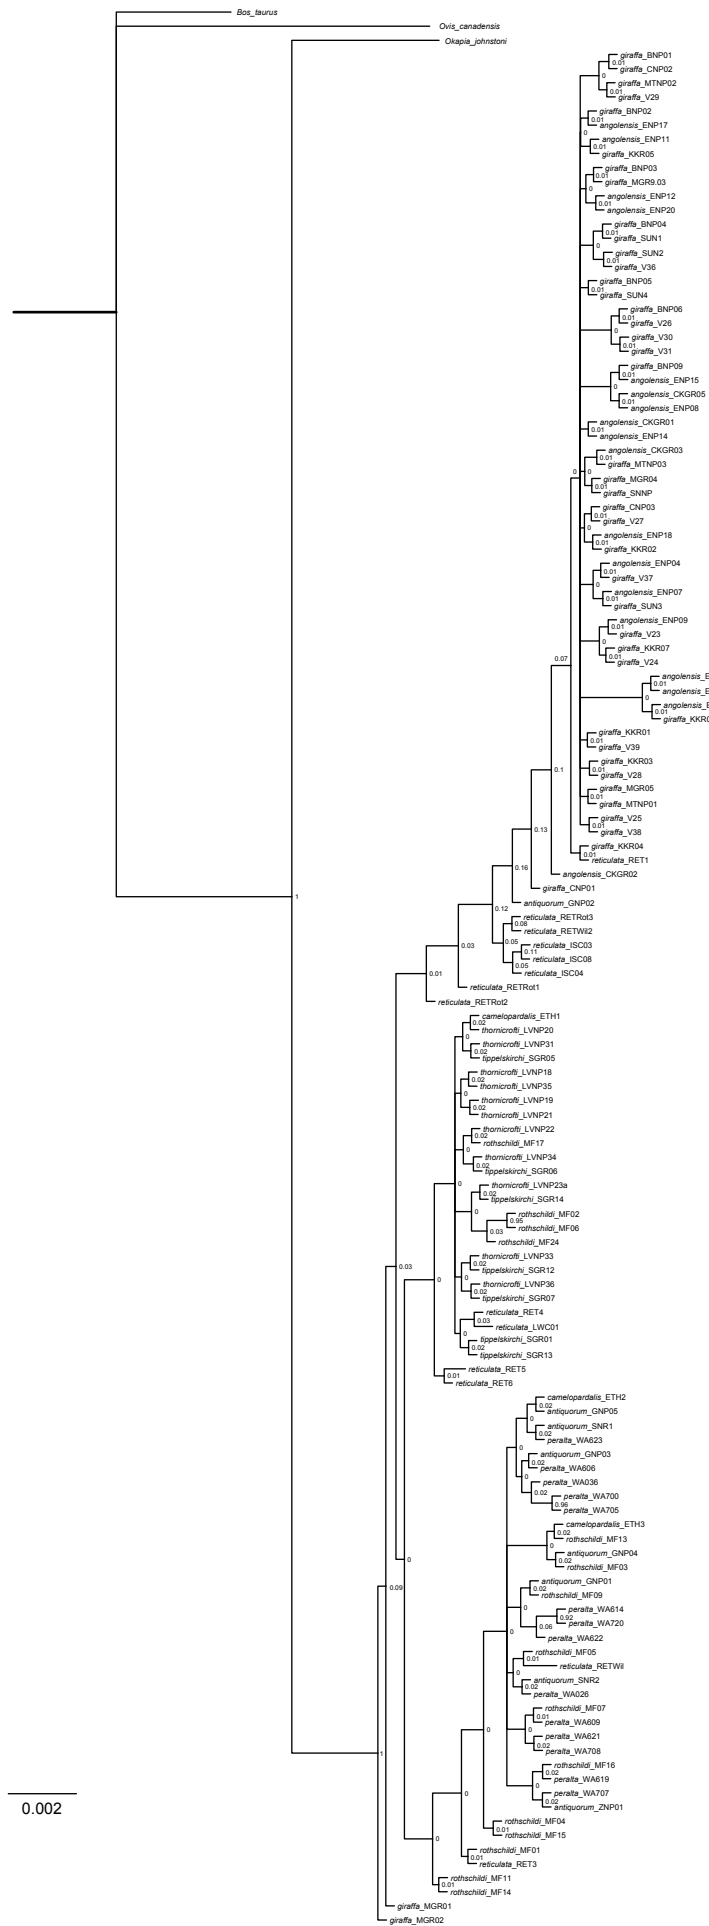

**Fig R.** Bayesian tree for the separate analysis of the 648 nucleotides (nt) long intron *RASSF4* with the posterior probability values indicated for each node.

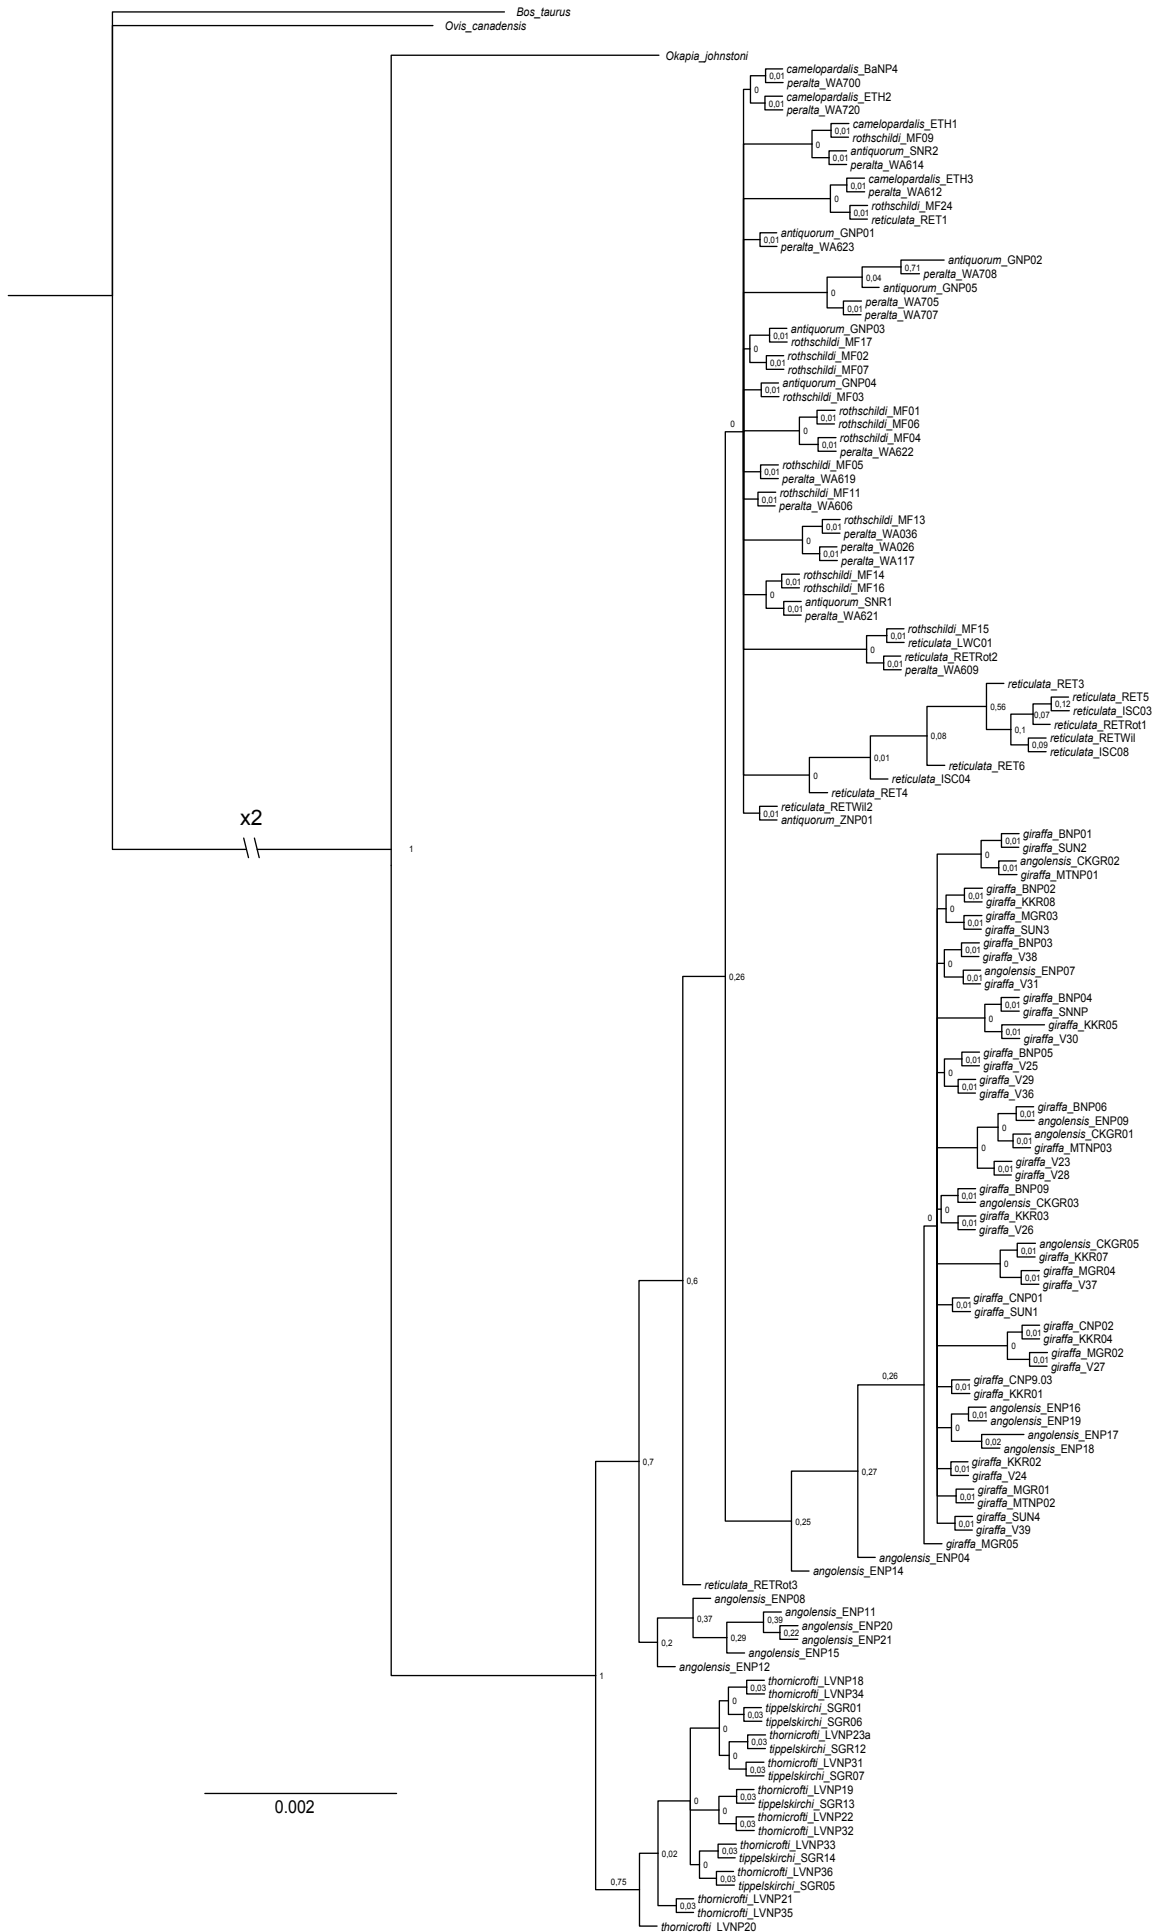

**Fig S.** Bayesian tree for the separate analysis of the 828 nucleotides (nt) long intron *RFC5* with the posterior probability values indicated for each node.

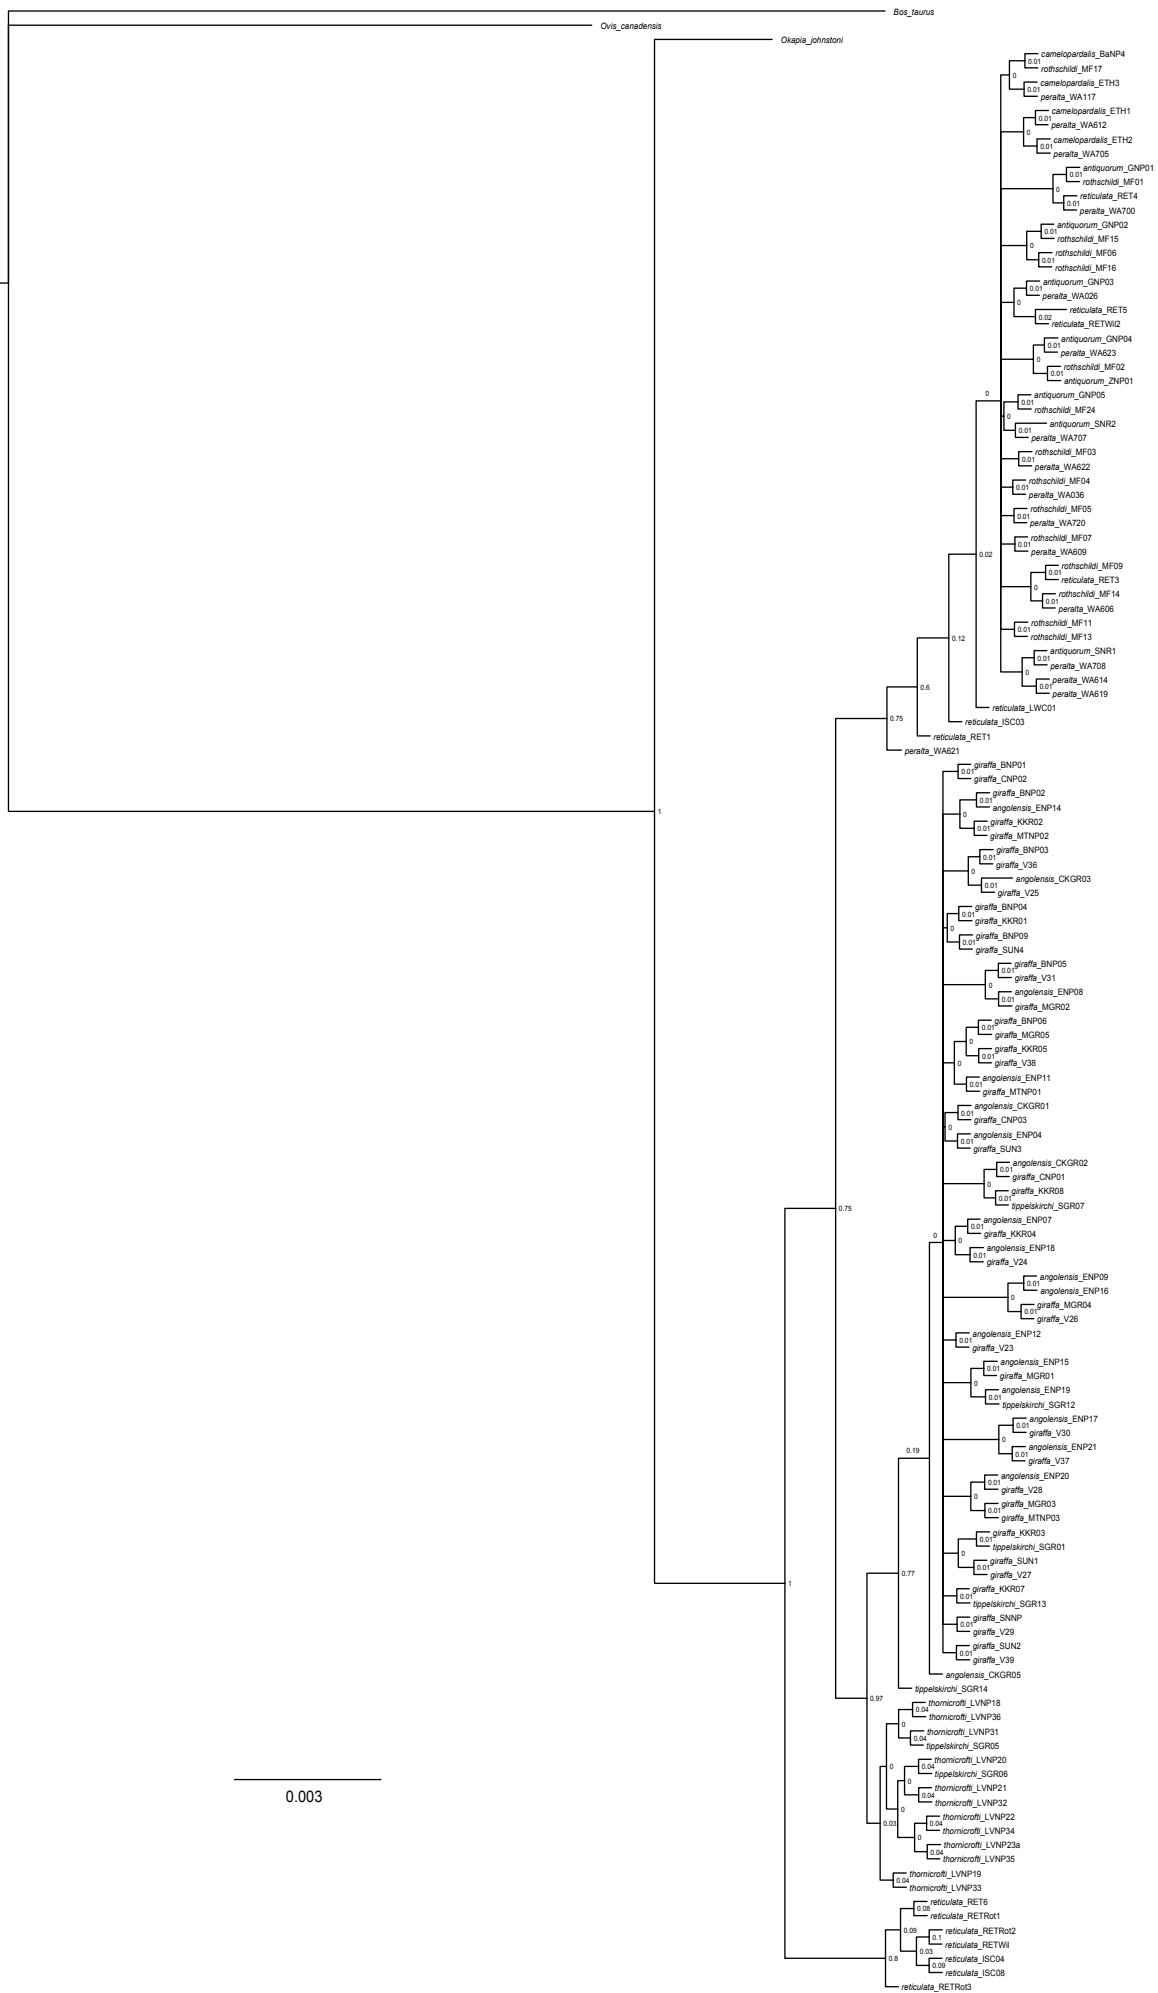

**Fig T.** Bayesian tree for the separate analysis of the 933 nucleotides (nt) long intron *SAP130* with the posterior probability values indicated for each node.

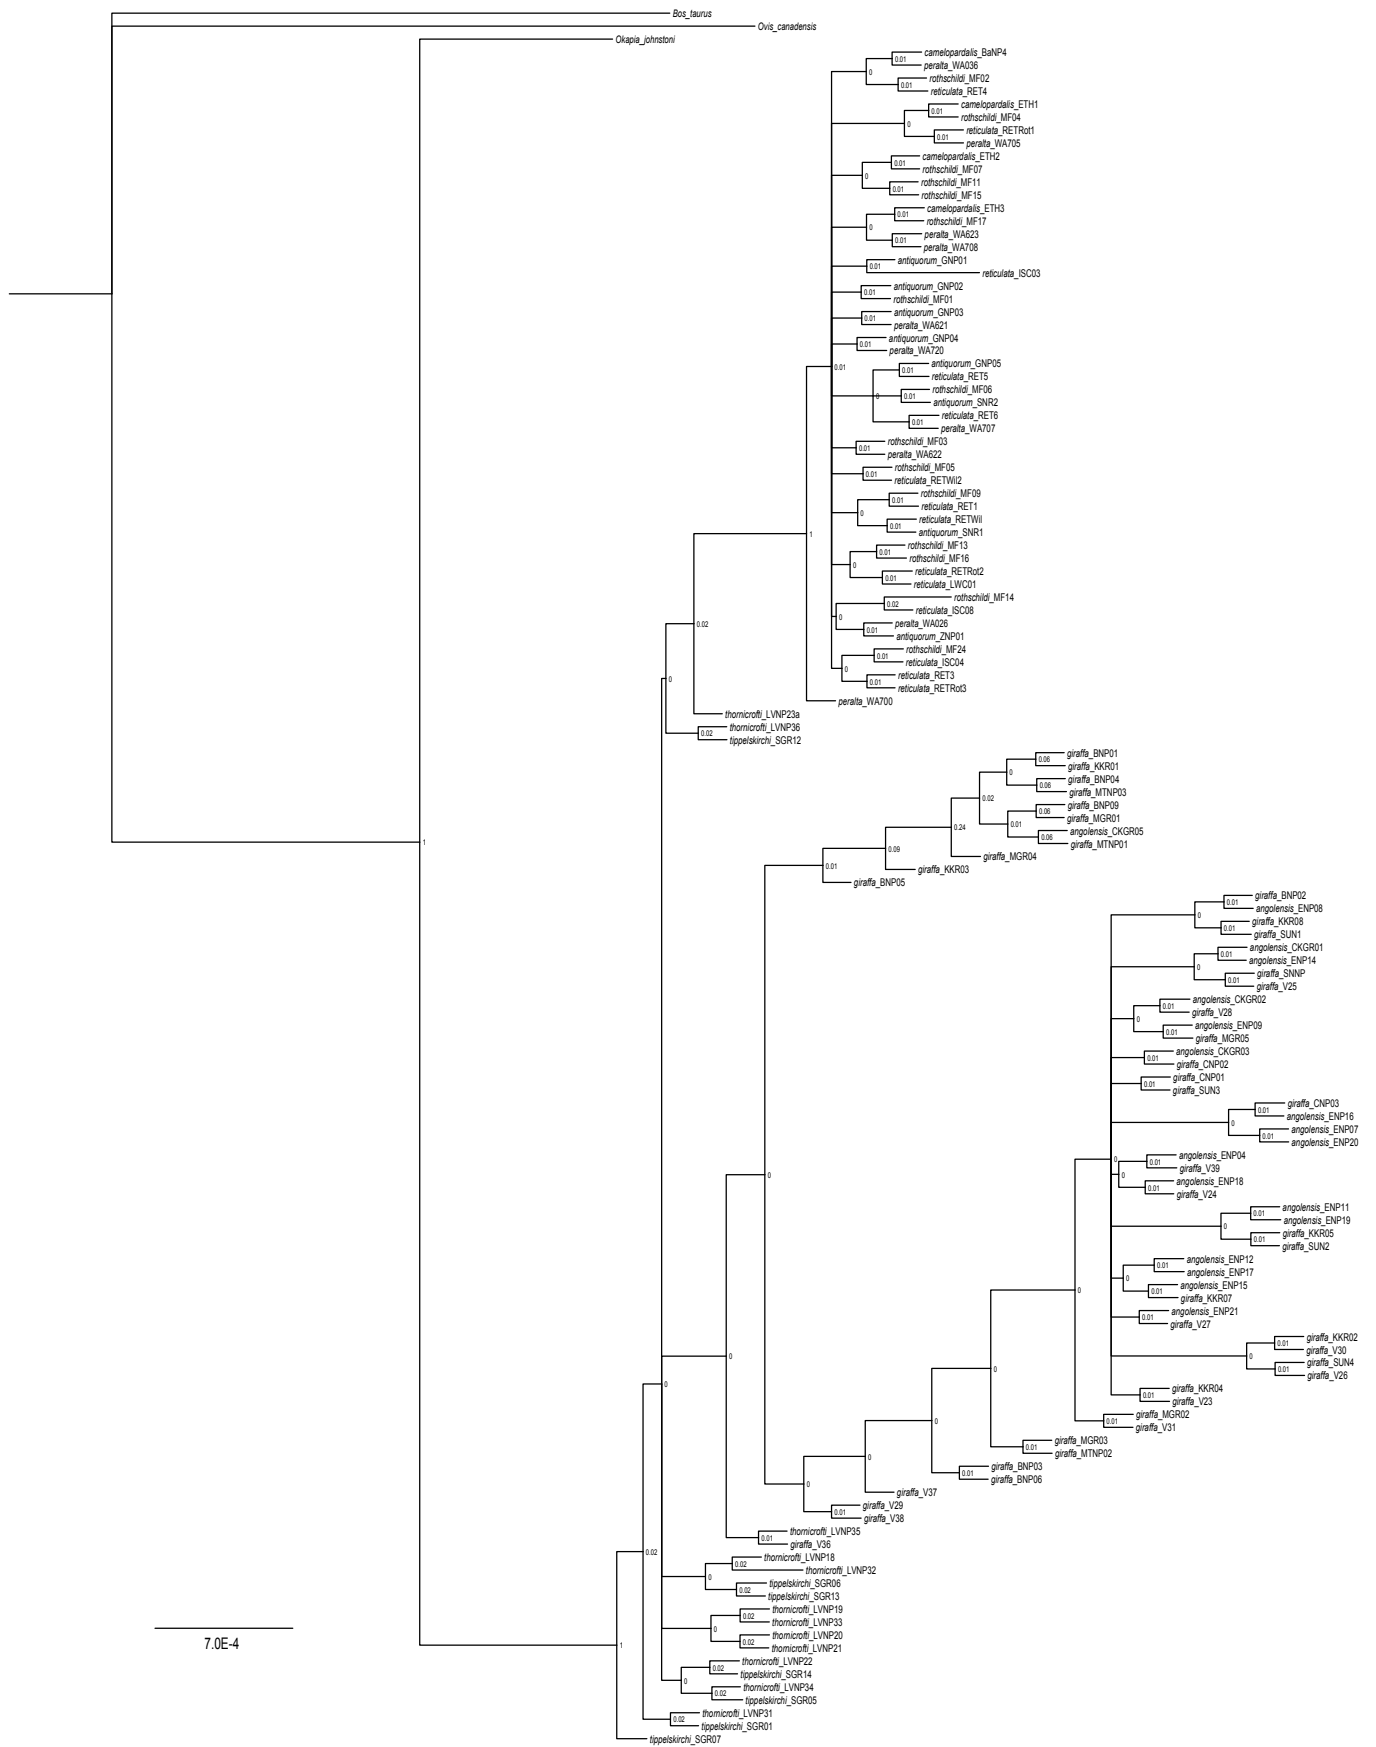

**Fig U.** Bayesian tree for the separate analysis of the 765 nucleotides (nt) long intron SOS1 with the posterior probability values indicated for each node.

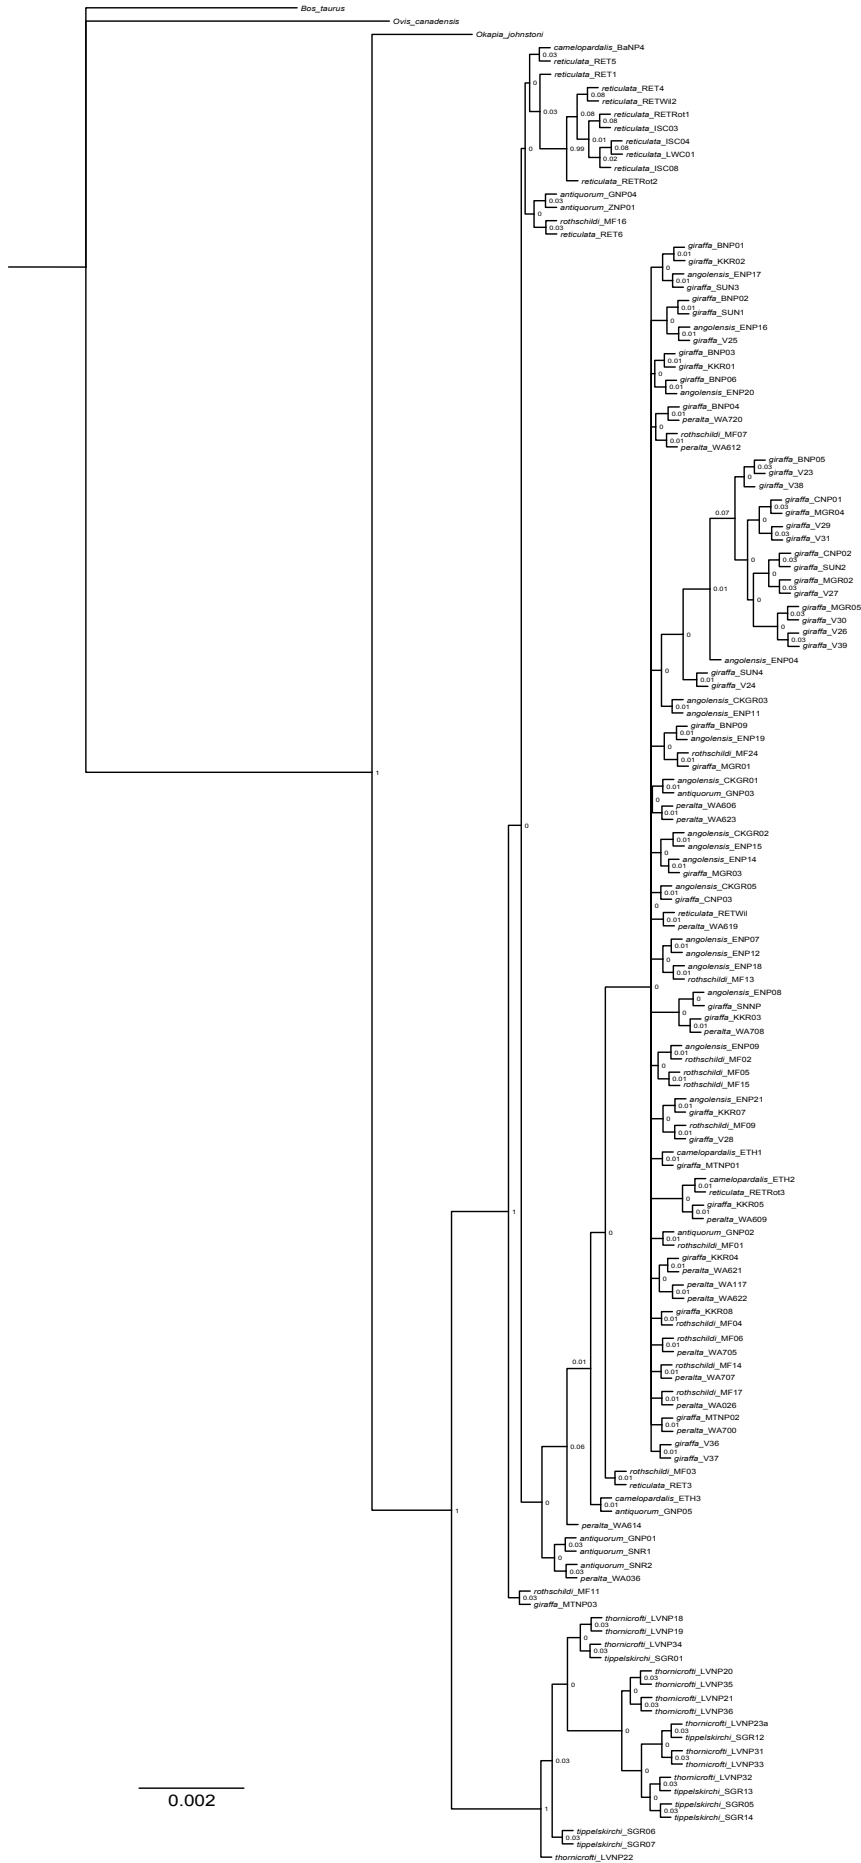

**Fig V.** Bayesian tree for the separate analysis of the 724 nucleotides (nt) long intron *UBN2* with the posterior probability values indicated for each node.

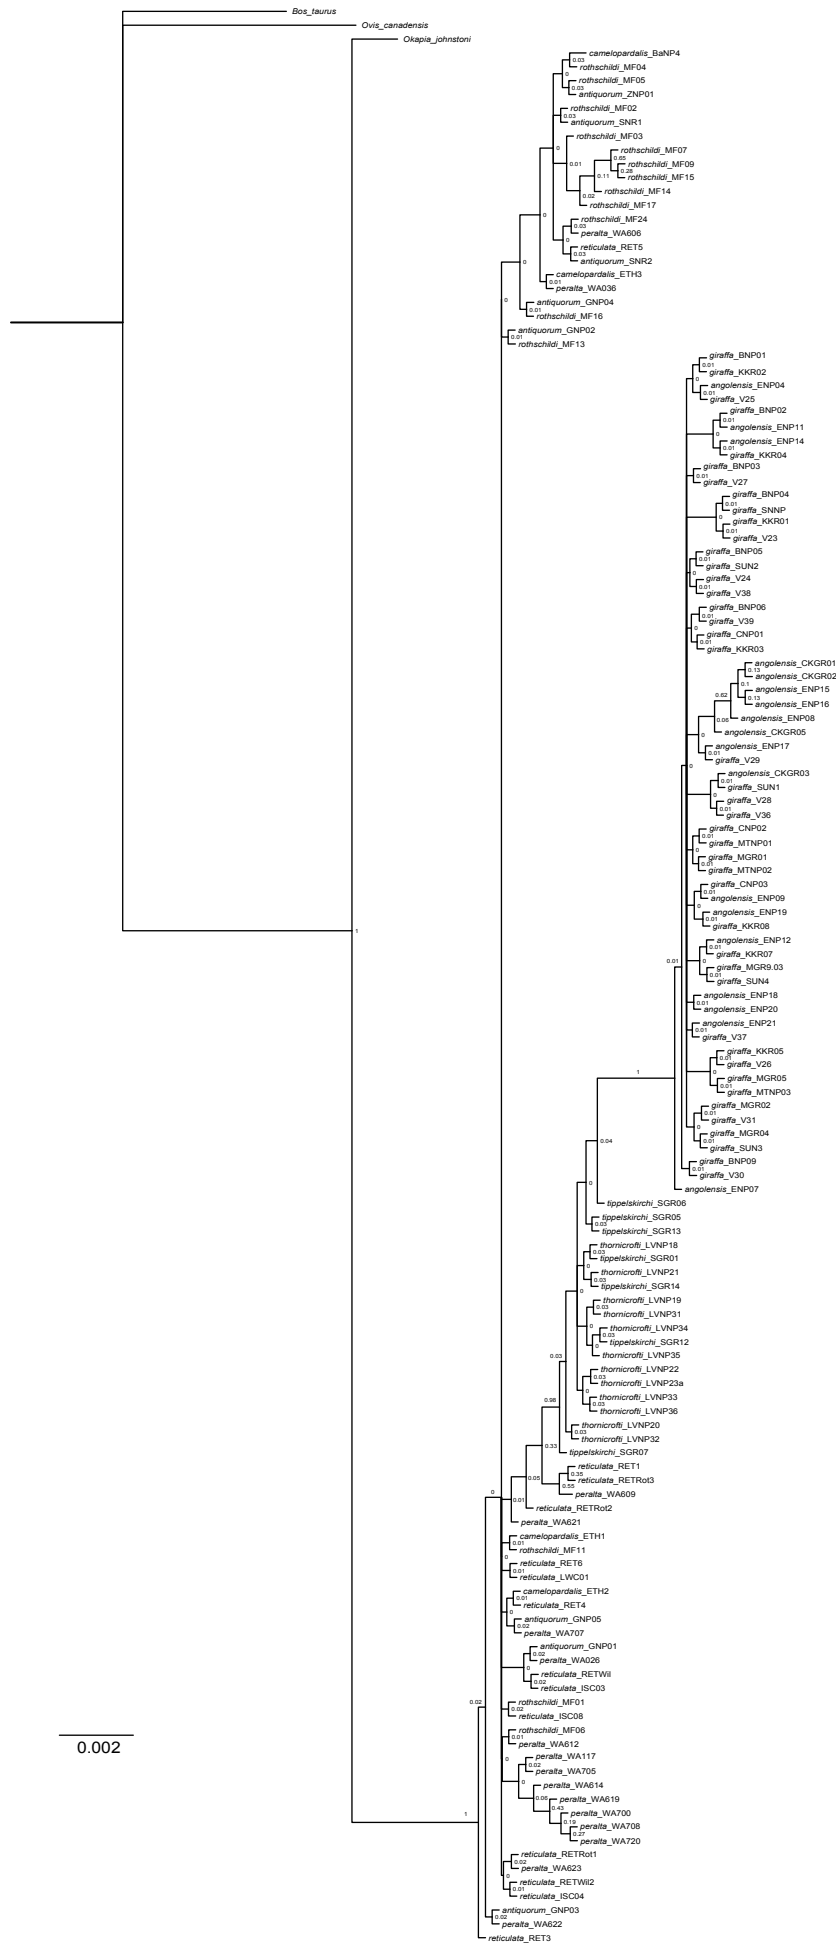

**Fig W.** Bayesian tree for the separate analysis of the 940 nucleotides (nt) long intron *USP33* with the posterior probability values indicated for each node.



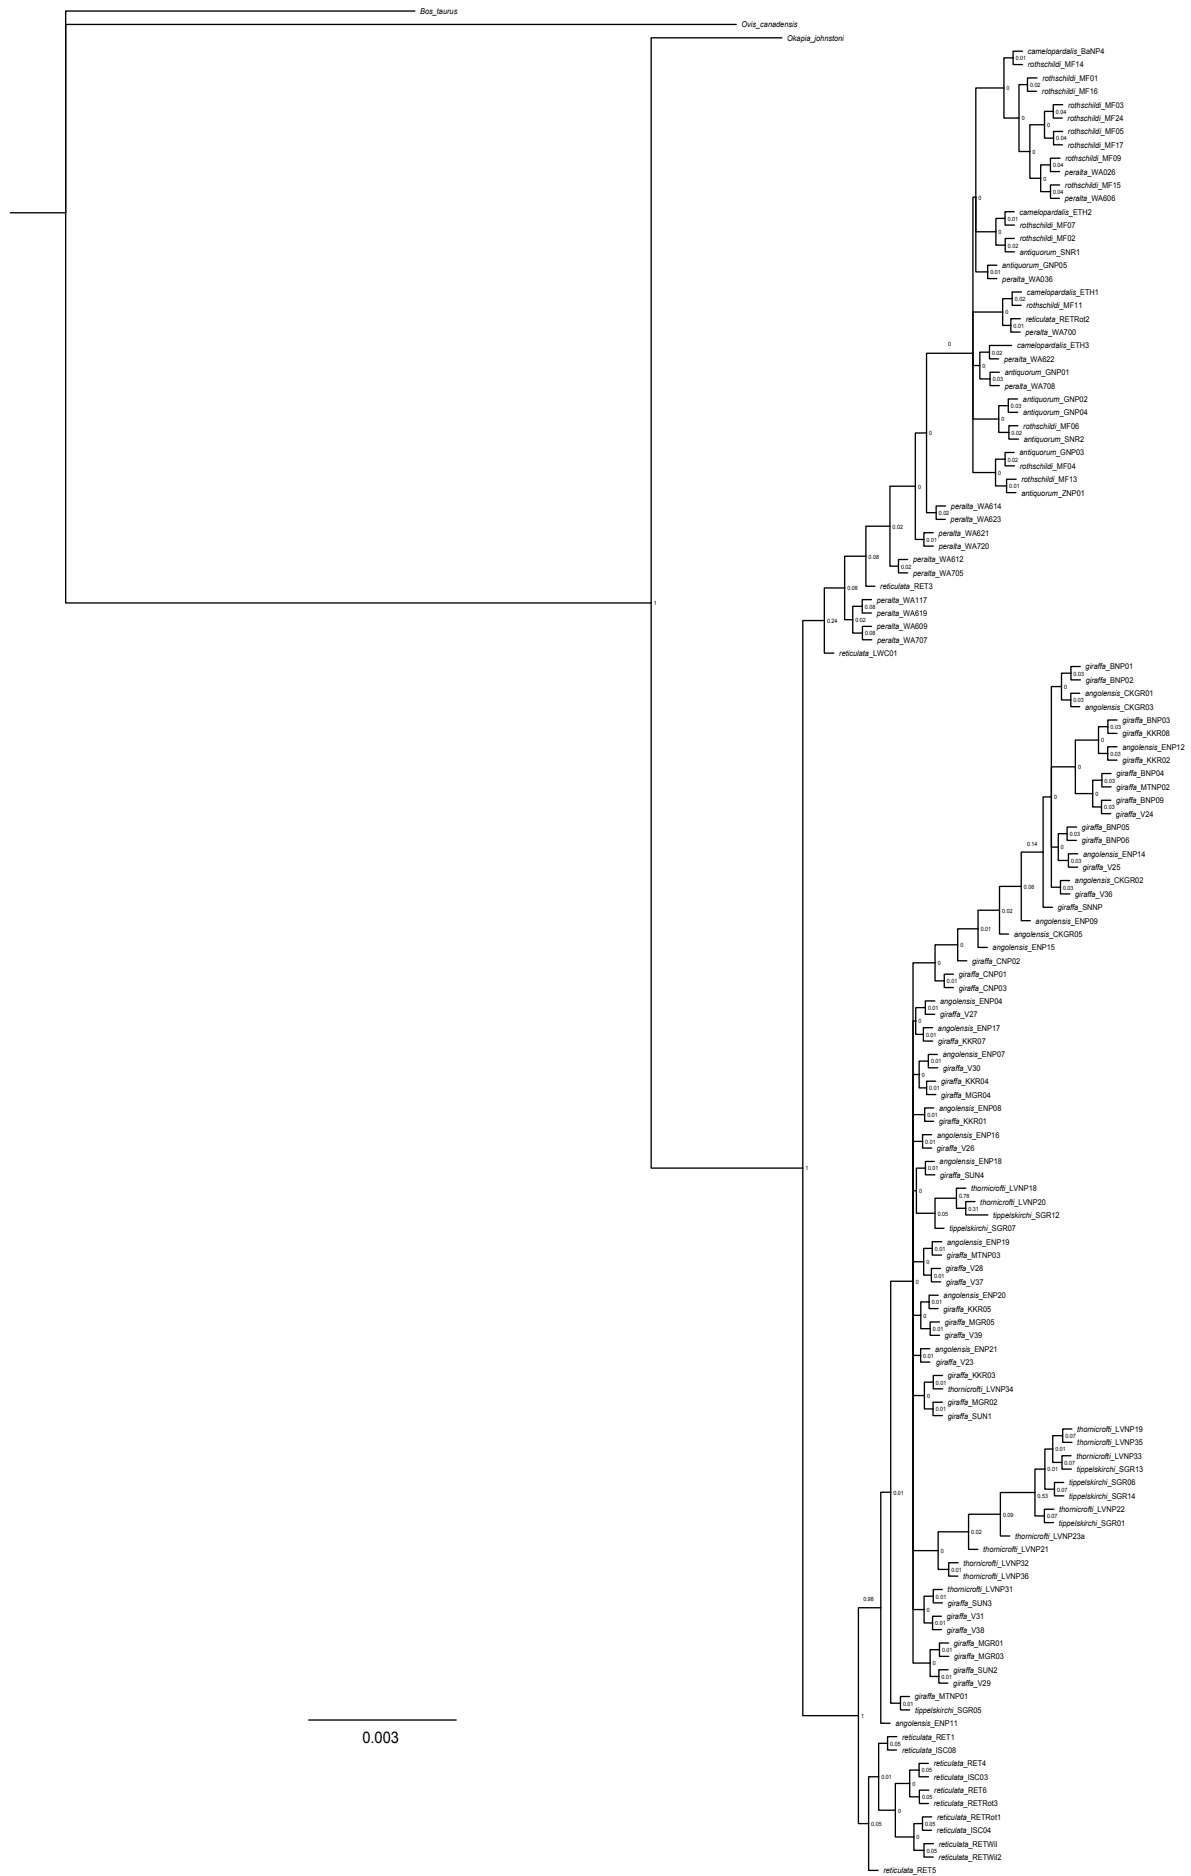

**Fig X.** Bayesian tree for the separate analysis of the 1332 nucleotides (nt) long intron *USP54* with the posterior probability values indicated for each node.

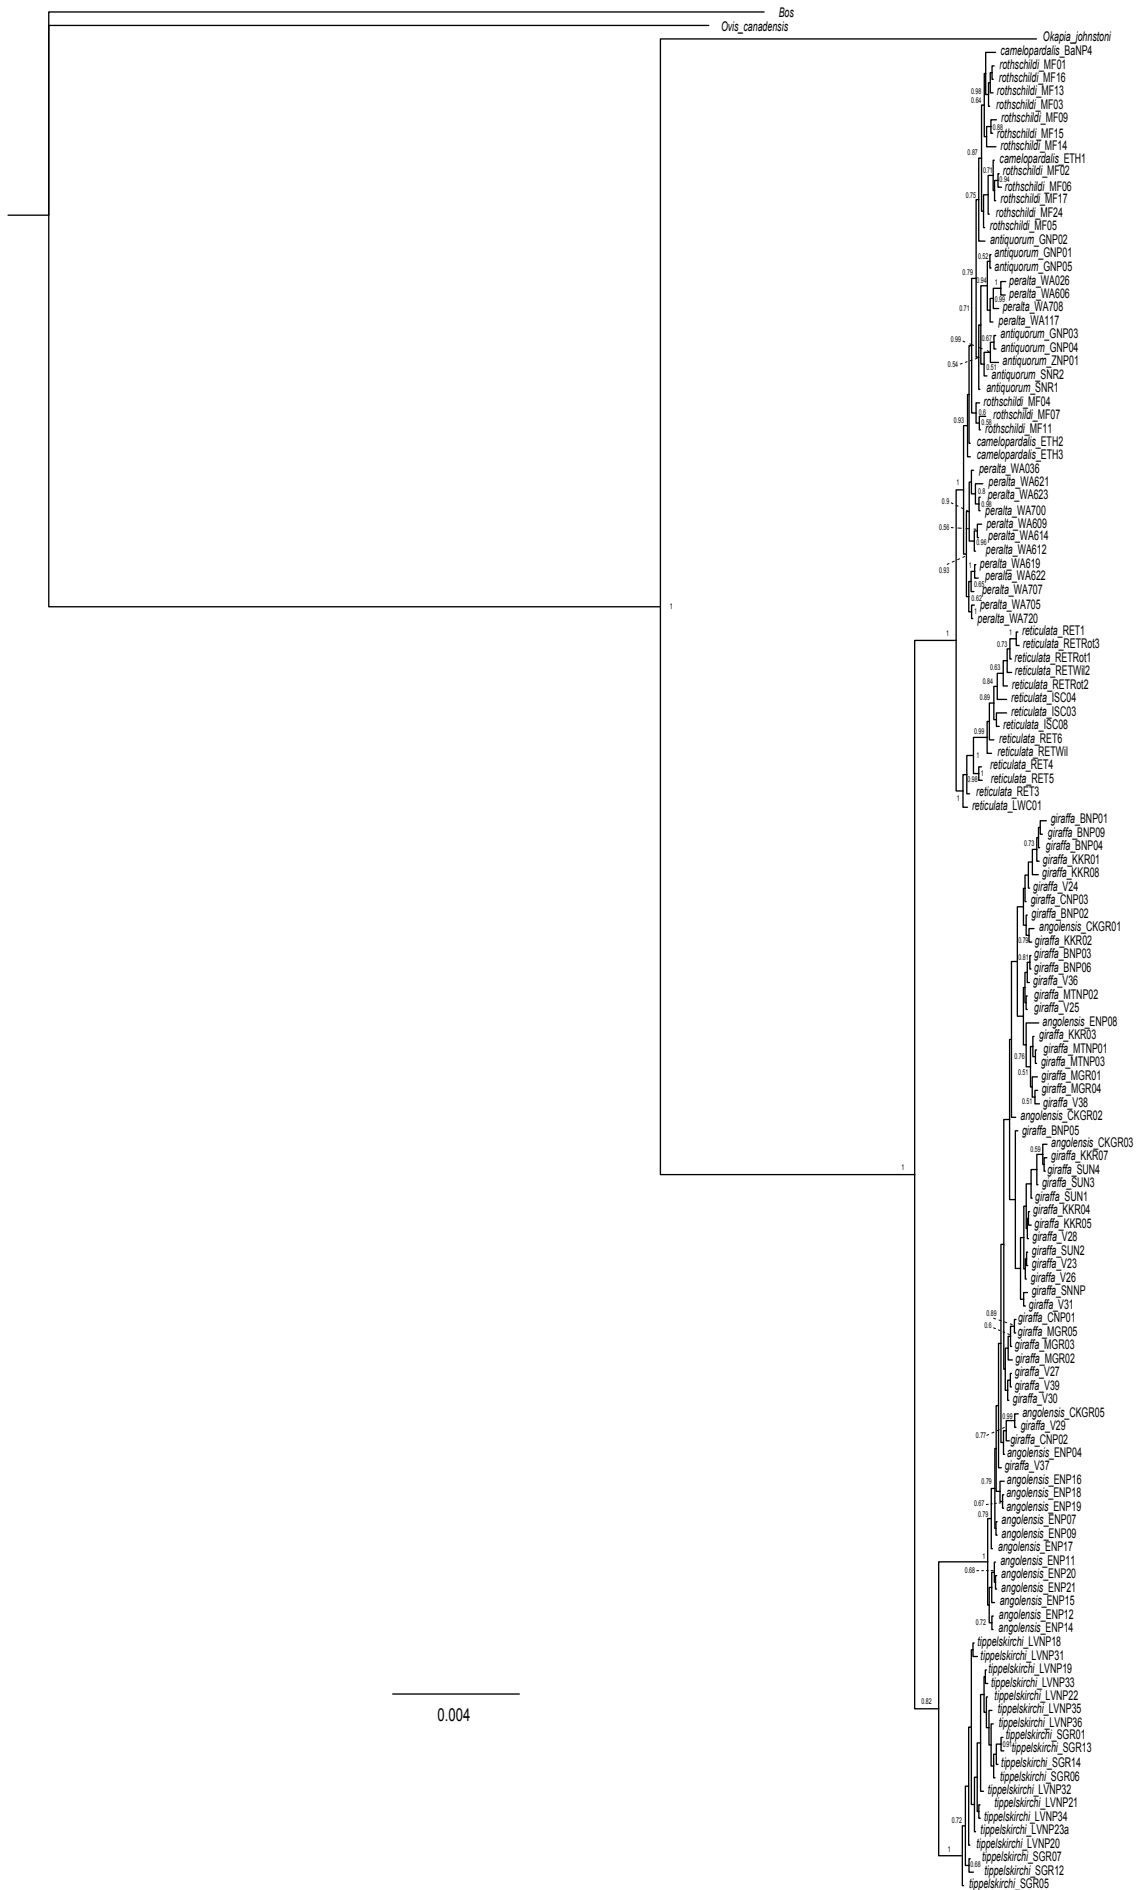

**Fig Y.** Bayesian tree (PP > 0.5) obtained from the analyses of nuDNA-137O3 dataset.

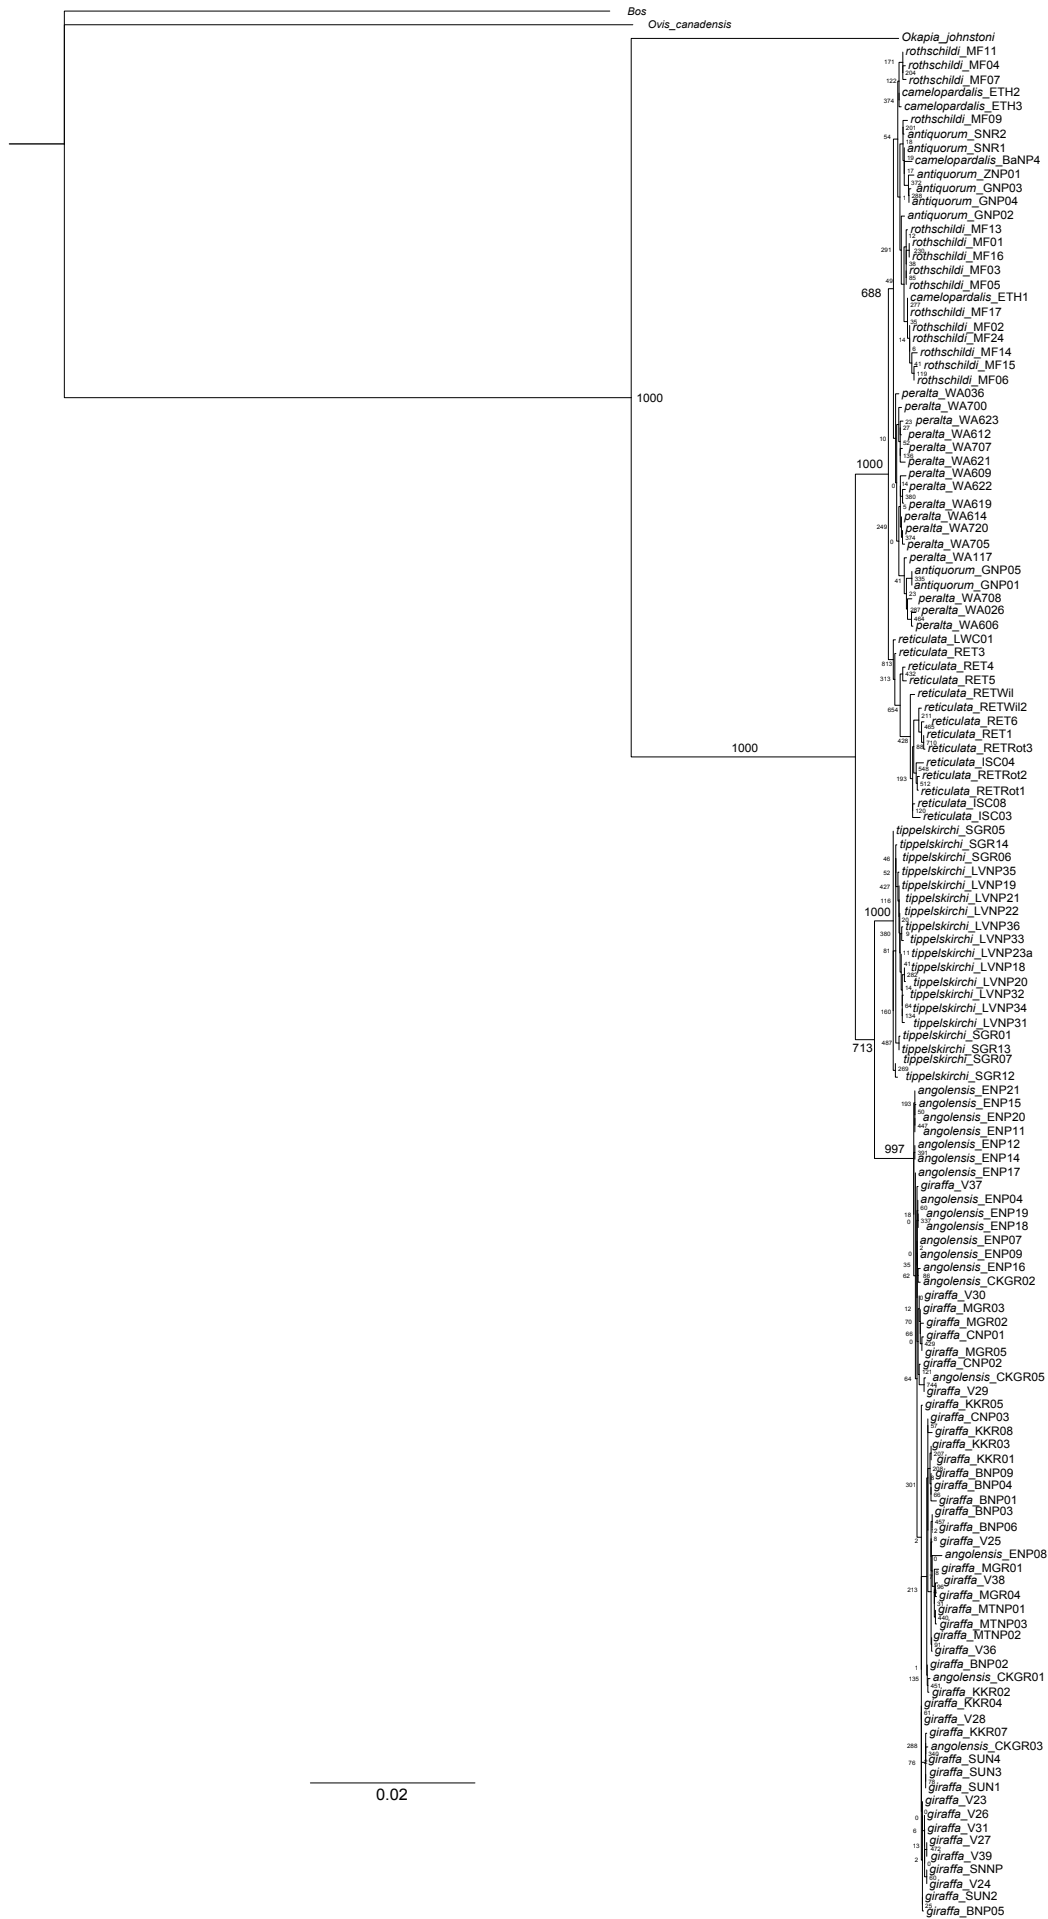

Fig Z. PhyML tree from the Maximum Likelihood analyses of the nuDNA-13703 dataset.

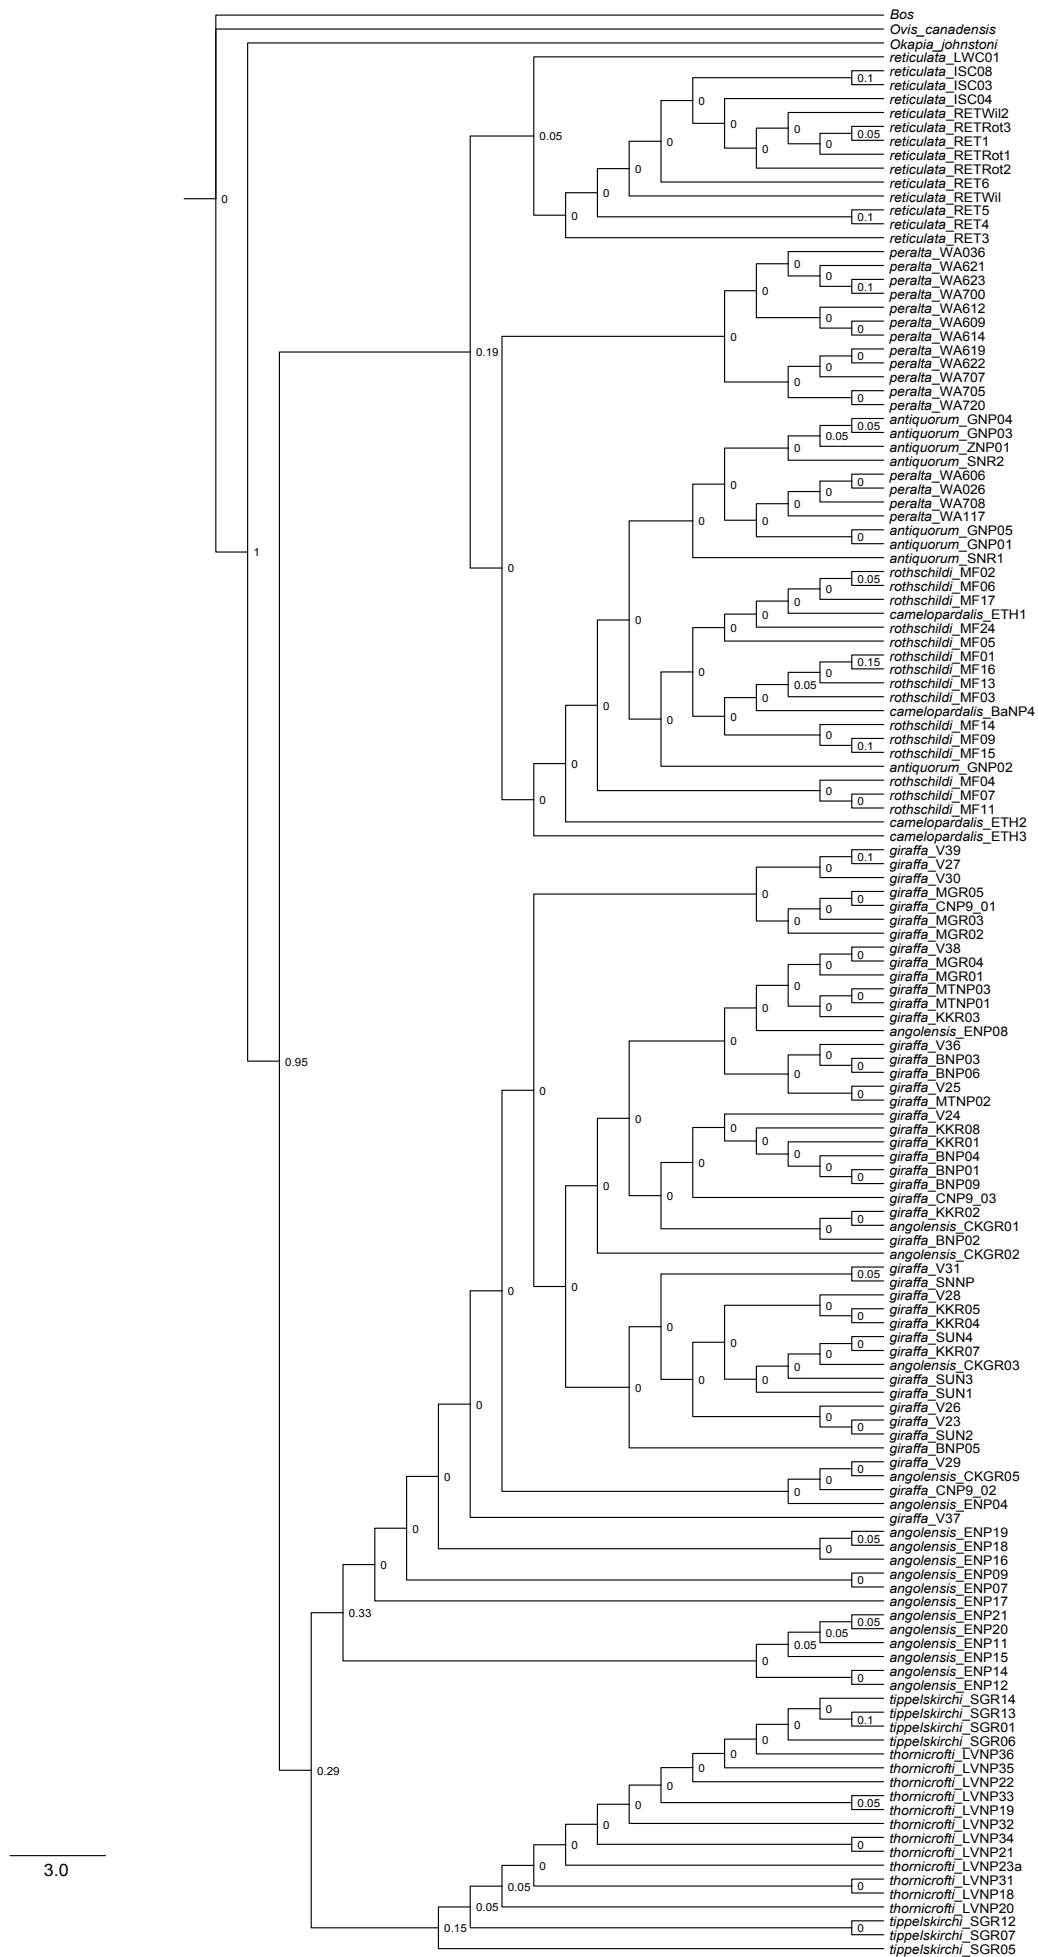

**Fig Aa.** Supertree showing the reproducibility indices (Rep) for the given topology, obtained from the analyses of the MRP matrix including 21 nuclear markers.

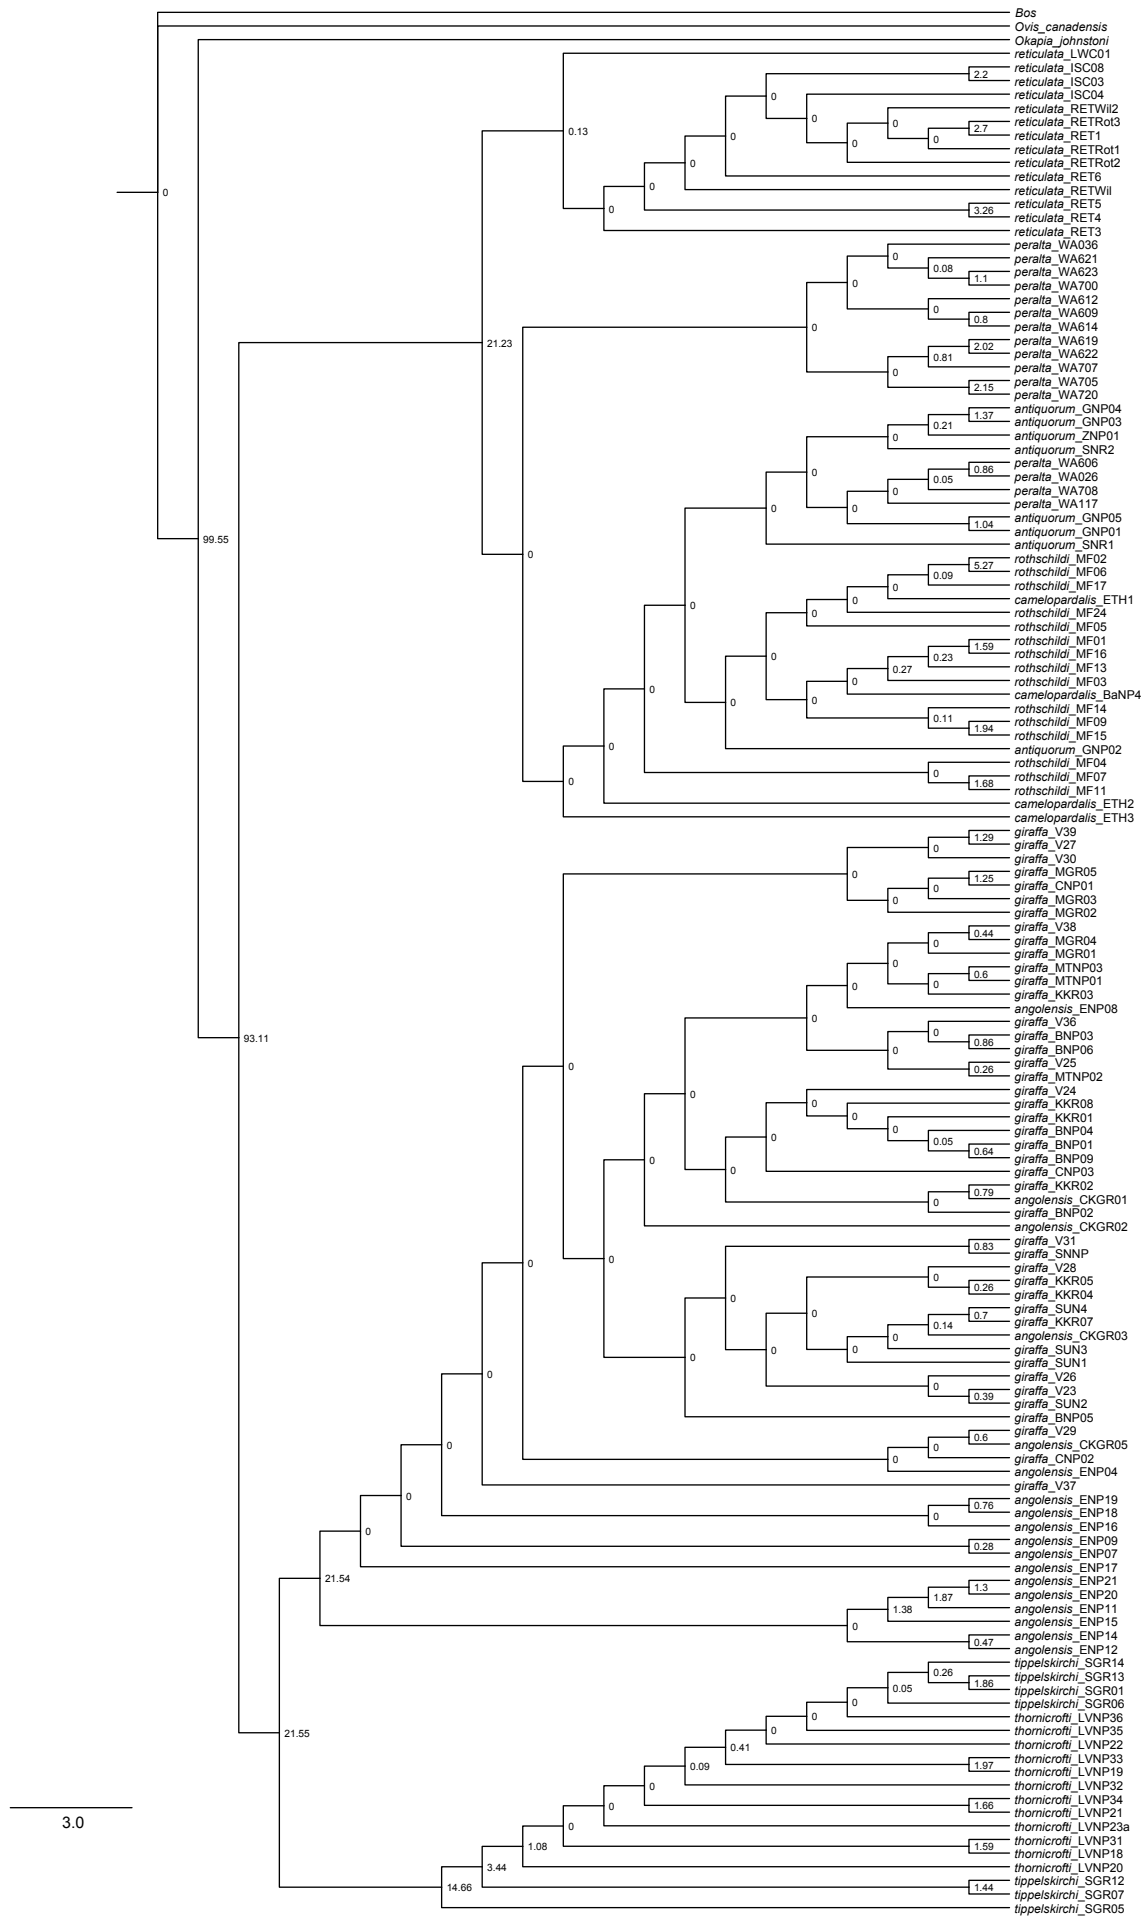

**Fig Ab.** Supertree showing the mean posterior probability values (MPP) for the given topology, obtained from the analyses of the MRP matrix including 21 nuclear markers.
