# Supplementary material for: A comparative approach for species delimitation based on multiple methods of multi-locus DNA sequence analysis: A case study of the genus Giraffa (Mammalia, Cetartiodactyla)
Source: PubMed Central journal article supplement (PMC7018015; doi:10.1371/journal.pone.0217956), 2020-02-13
Supplement: pone.0217956.s003.pdf [file pone.0217956.s003.pdf]

### S3 Appendix. Population Structure analyses

## A comparative approach for species delimitation based on multiple methods of multi-locus DNA sequence analysis: a case study of the genus *Giraffa* (Mammalia, Cetartiodactyla)

Alice Petzold<sup>1,2</sup>, Alexandre Hassanin<sup>1,2\*</sup>

1 Institut de Systématique, Évolution, Biodiversité (ISYEB), Sorbonne Université, MNHN, CNRS, EPHE, Paris, France

2 Muséum national d'Histoire naturelle, CP51, 55 rue Buffon - 75005 Paris, France

\*Correspondence: [alexandre.hassanin@mnhn.fr](mailto:alexandre.hassanin@mnhn.fr)

### STRUCTURE HARVESTER results for K = 1-10 populations.

The log probabilities of the data ( $\ln \Pr (X|K)$ ) and  $\Delta K$  were obtained from 24 STRUCTURE analyses based on 21 nuclear introns for 137 giraffe individuals (see Table 2) using different model parameters (see below for details, summarized in Table 3).

**Fig A.** Admixture model, LOCPRIOR, correlated allele frequency,  $\lambda = 1.0$

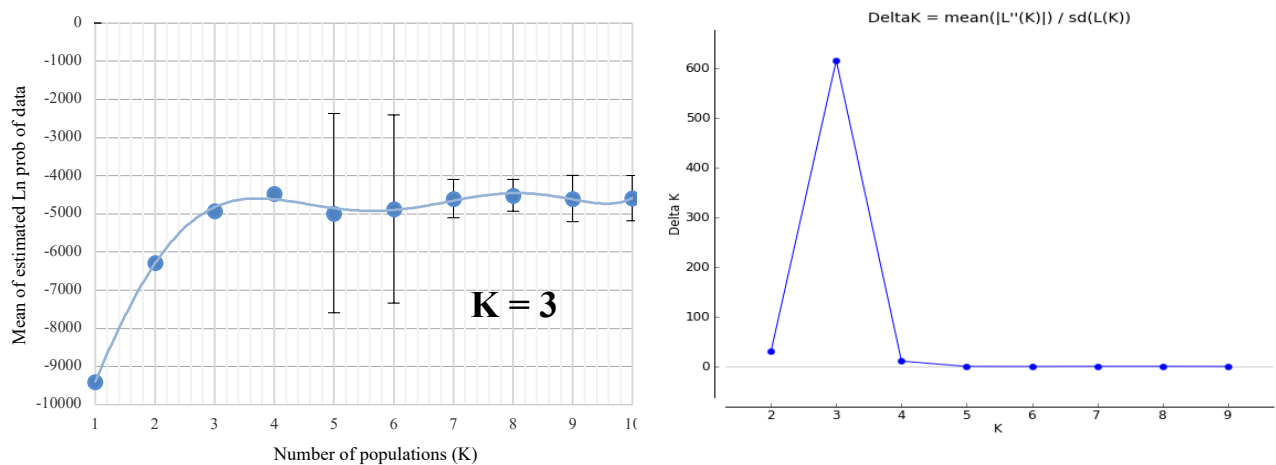

**Fig B.** Admixture model, LOCPRIOR, independent allele frequency,  $\lambda = 1.0$

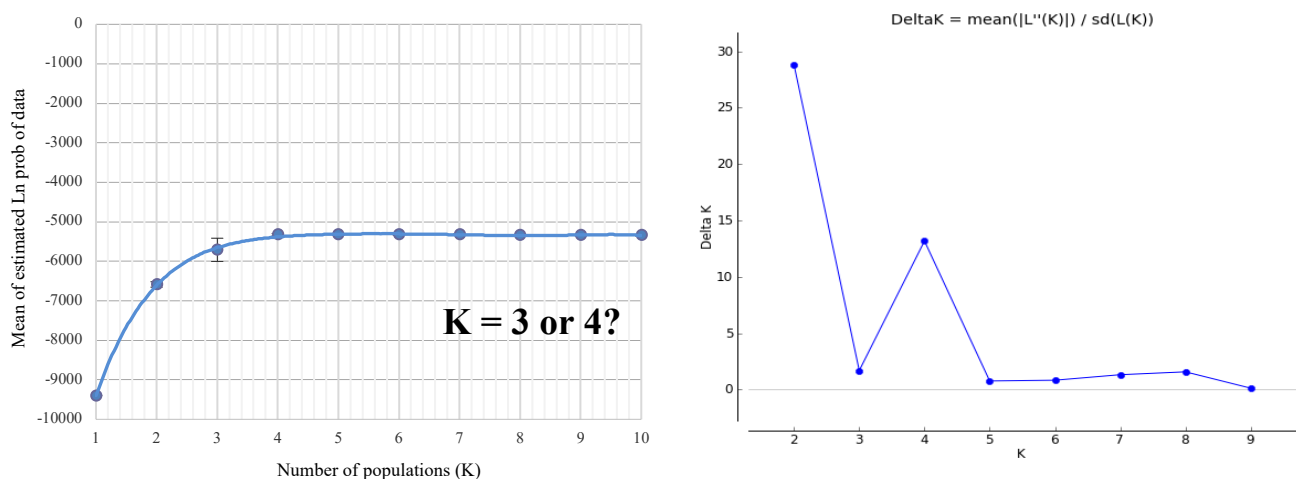

**Fig C.** Admixture model, POPID, correlated allele frequency,  $\lambda = 1.0$

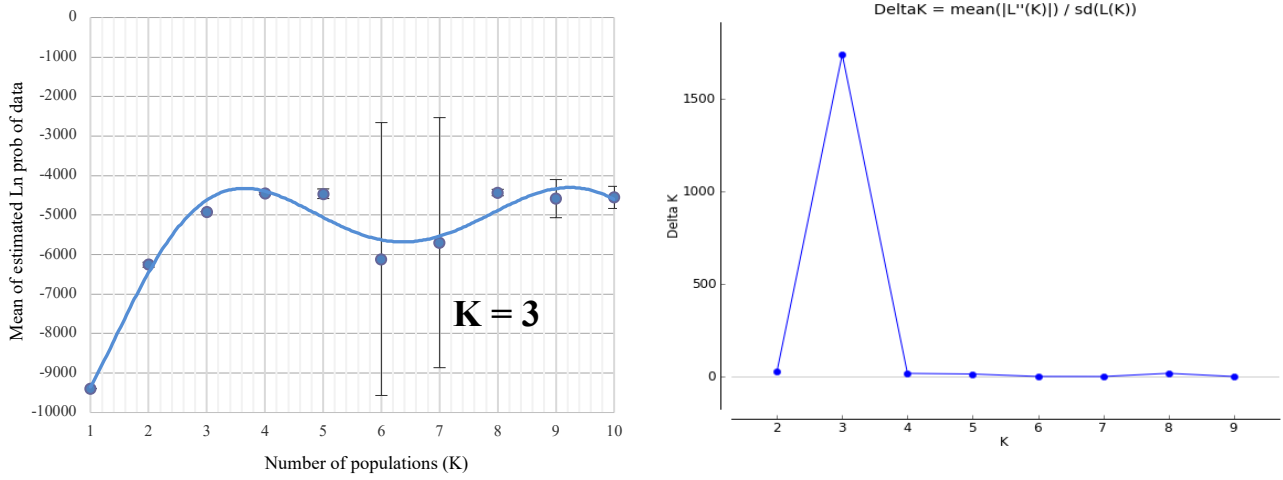

**Fig D.** Admixture model, POPID, independent allele frequency,  $\lambda = 1.0$

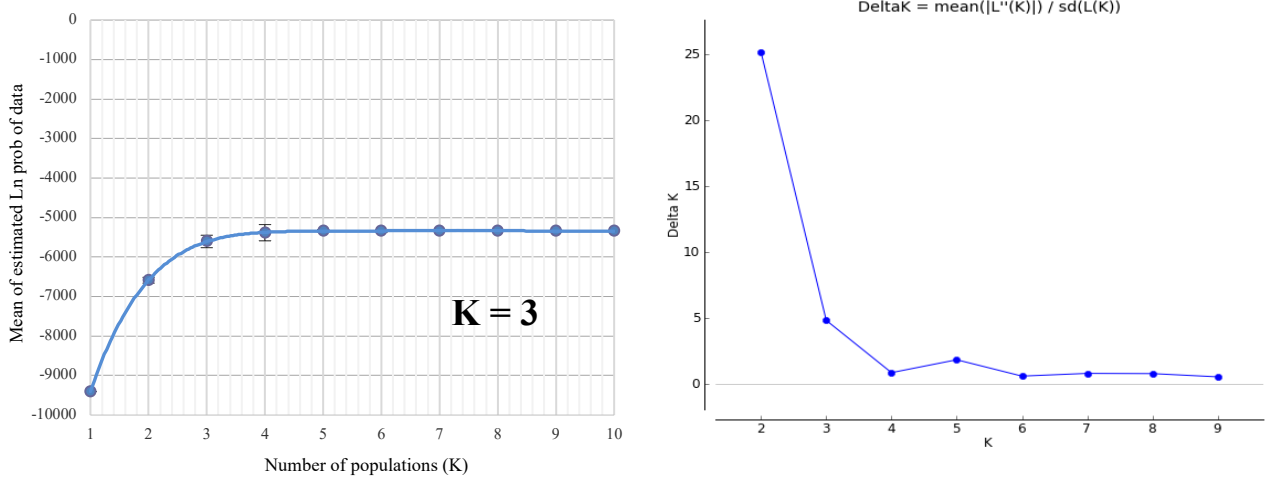

**Fig E.** Admixture model, no assignment, correlated allele frequency,  $\lambda = 1.0$

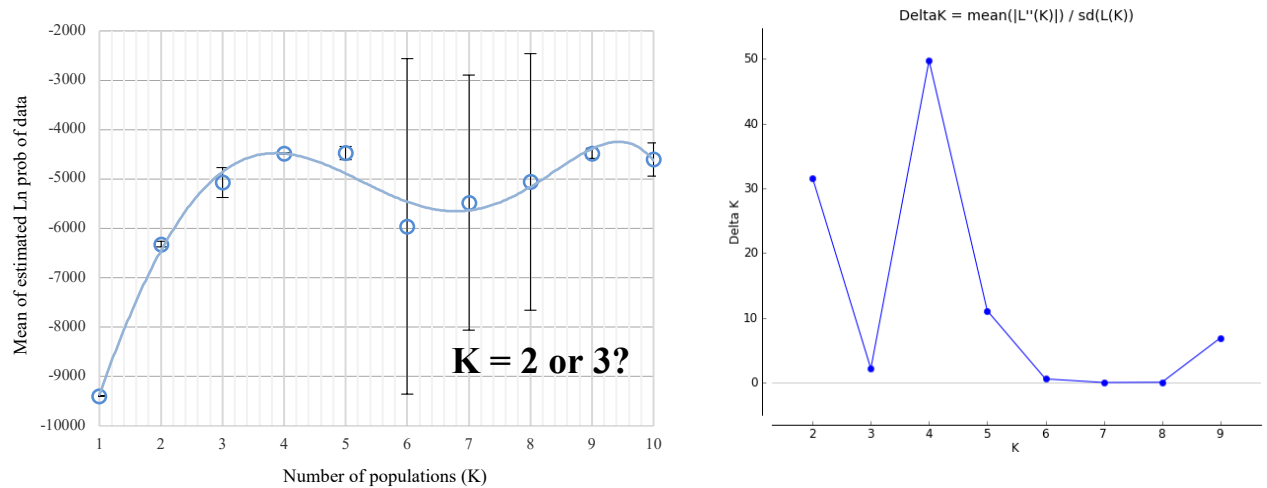

**Fig F.** Admixture model, no assignment, independent allele frequency,  $\lambda = 1.0$

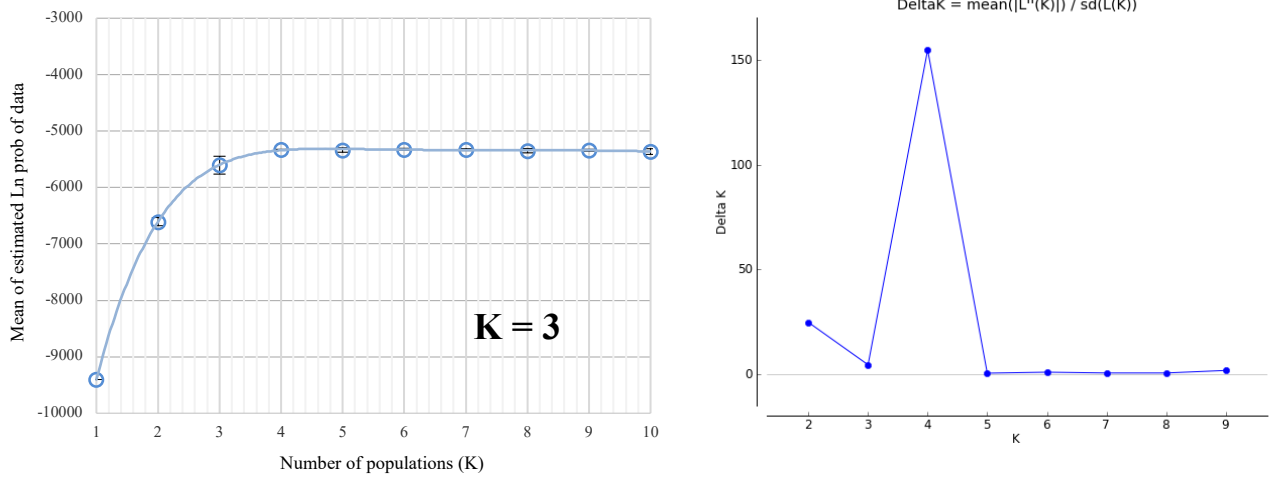

**Fig G.** No admixture model, LOCPRIOR, correlated allele frequency,  $\lambda = 1.0$

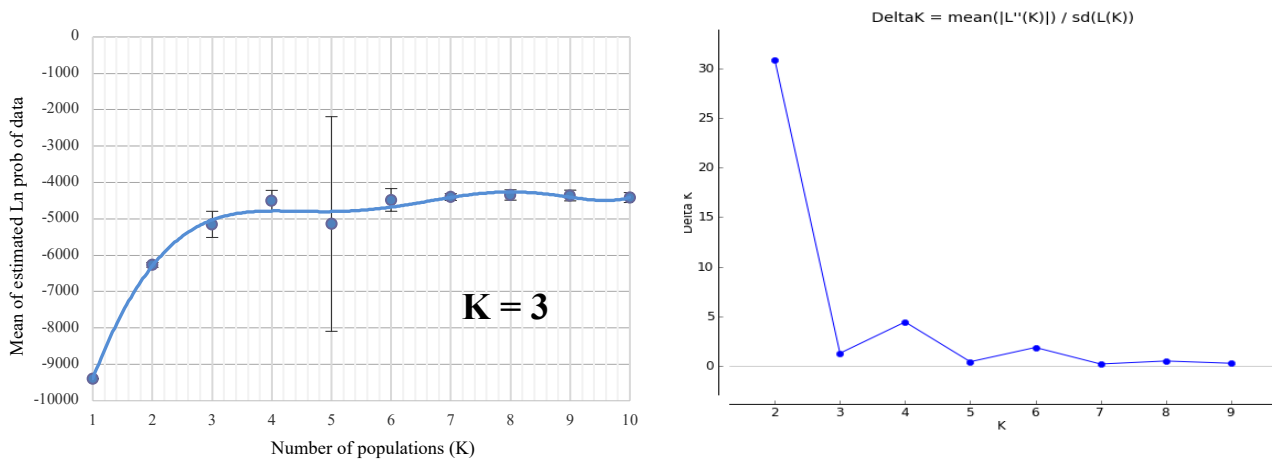

**Fig H.** No admixture model, LOCPRIOR, independent allele frequency,  $\lambda = 1.0$

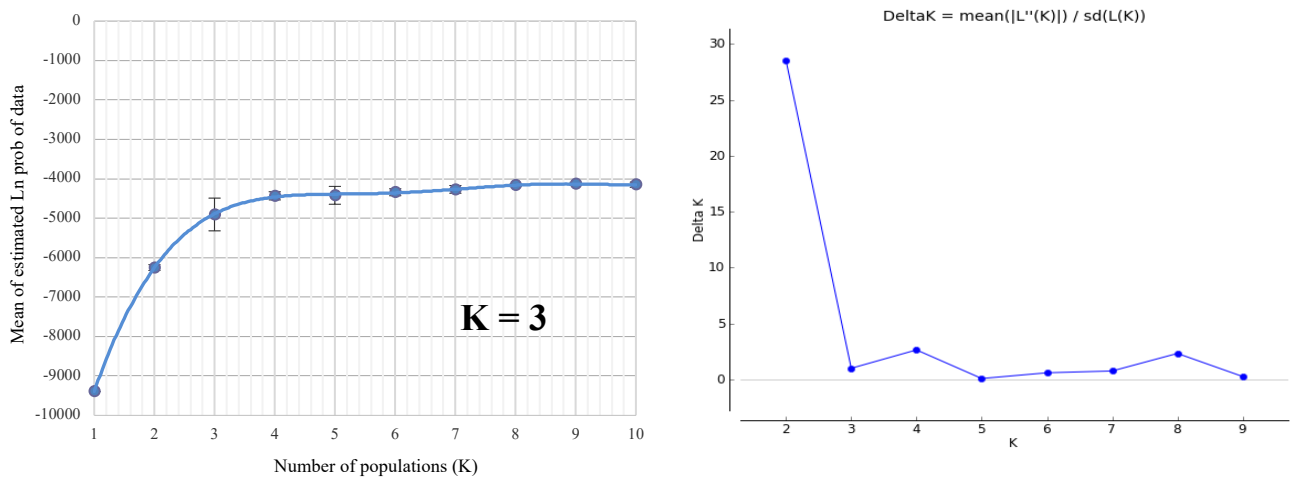

**Fig I.** No admixture model, POPID, correlated allele frequency,  $\lambda = 1.0$

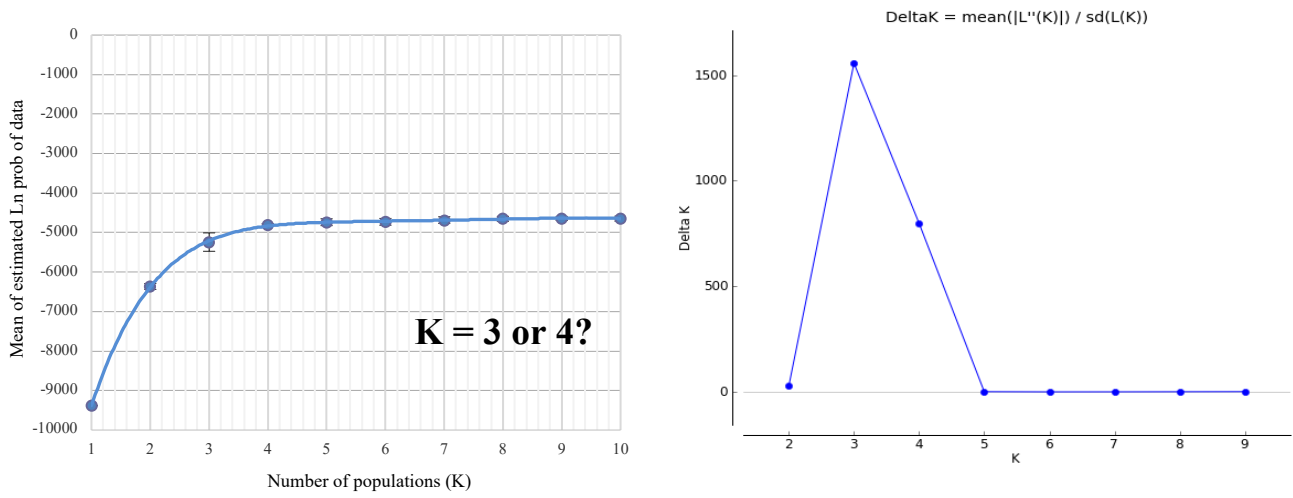

**Fig J.** No admixture model, POPID, independent allele frequency,  $\lambda = 1.0$

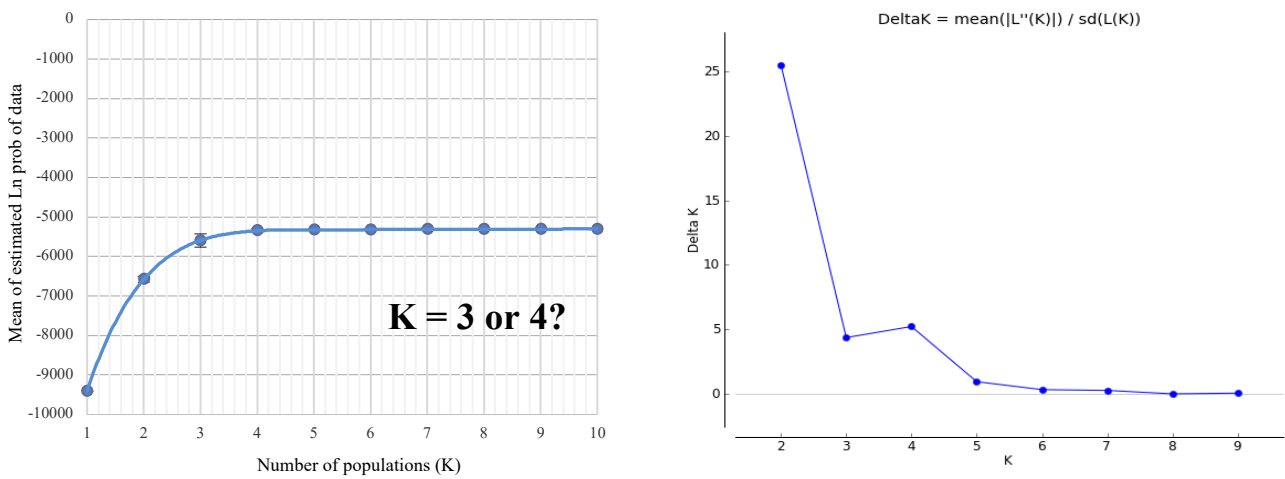

**Fig K.** No admixture model, no assignation, correlated allele frequency,  $\lambda = 1.0$

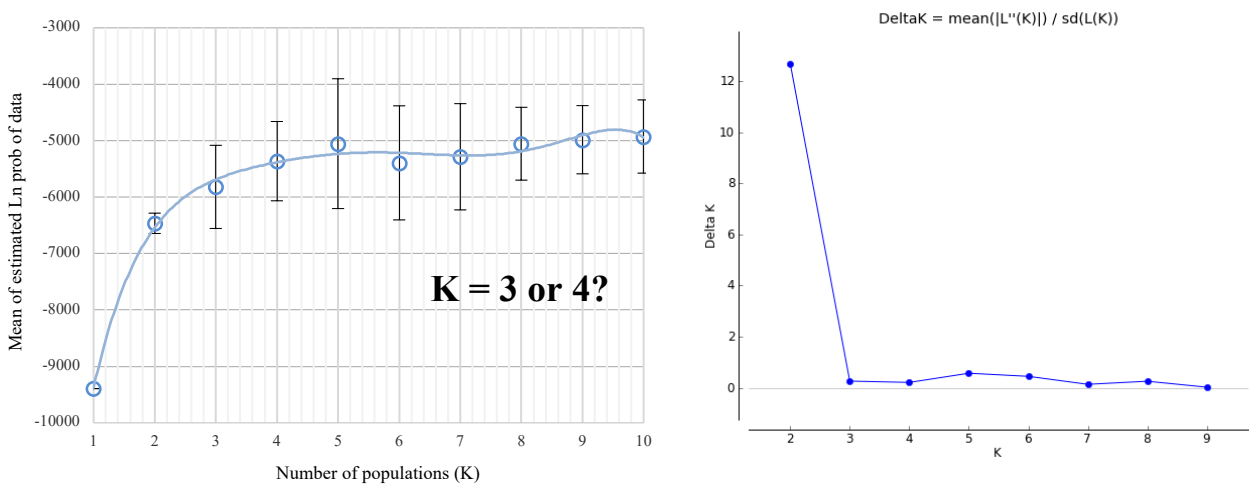

**Fig L.** No admixture model, no assignation, independent allele frequency,  $\lambda = 1.0$

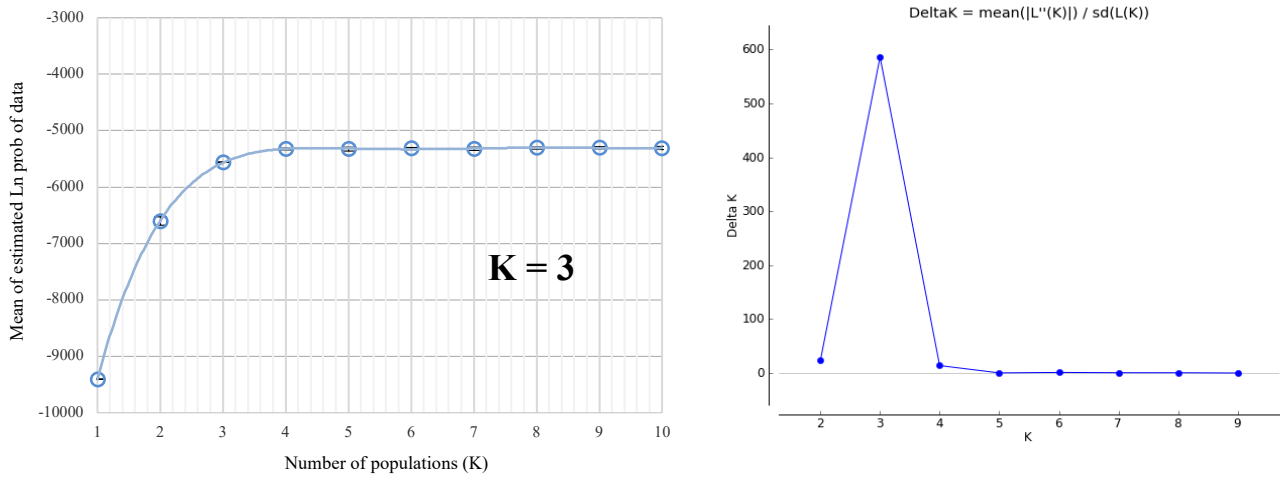

**Fig M.** Admixture model, LOCPRIOR, correlated allele frequency,  $\lambda = 0.45$

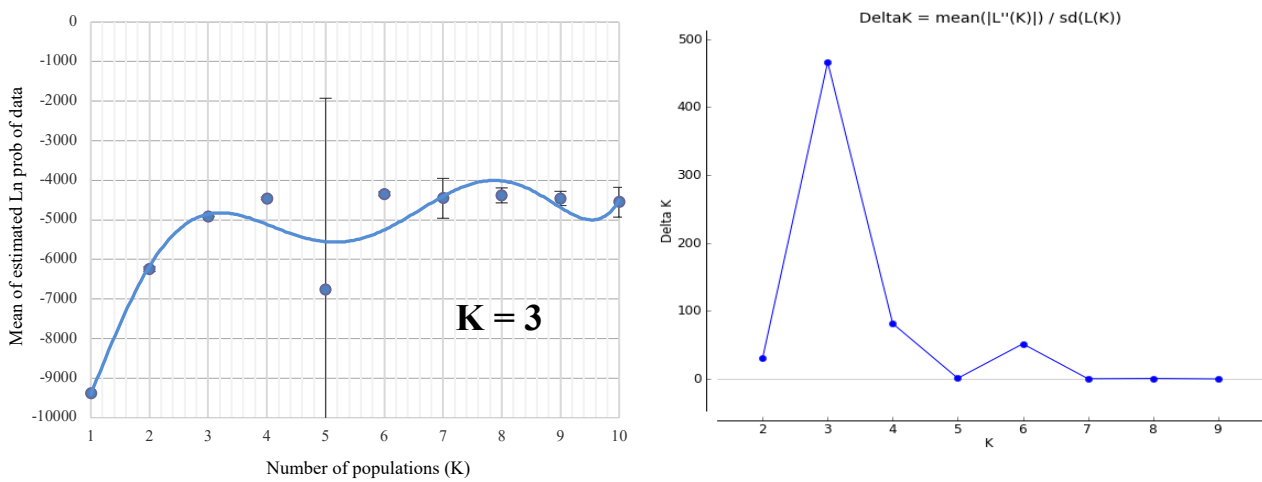

**Fig N.** Admixture model, LOCPRIOR, independent allele frequency,  $\lambda = 0.45$

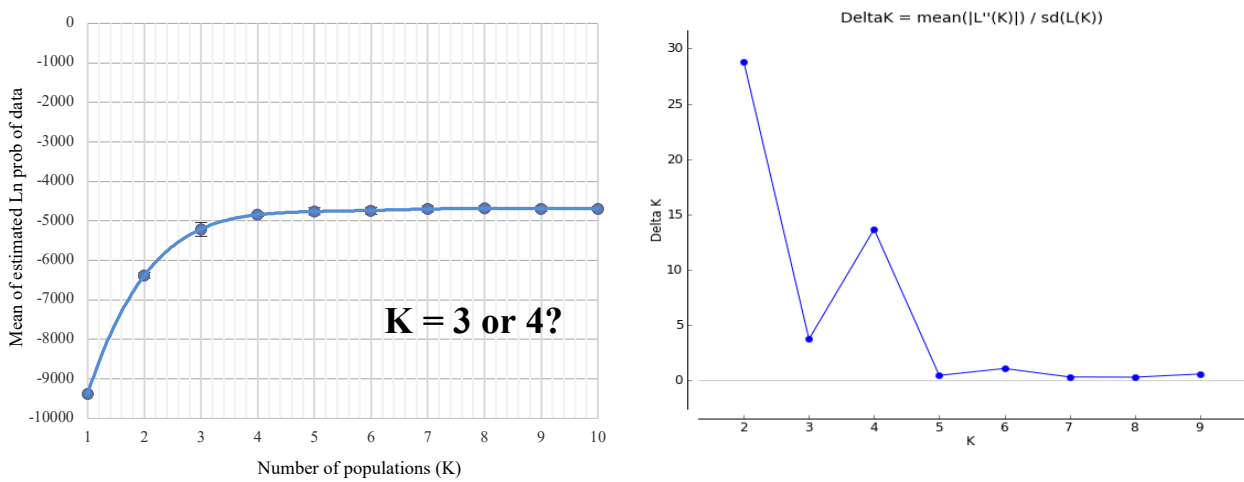

**Fig O.** Admixture model, POPID, correlated allele frequency,  $\lambda = 0.45$

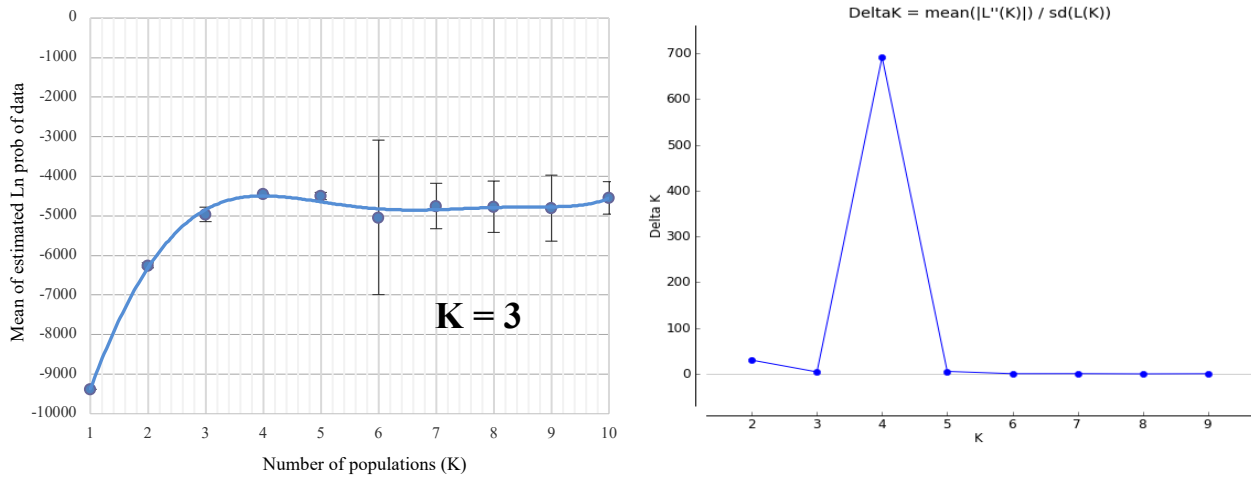

**Fig P.** Admixture model, POPID, independent allele frequency,  $\lambda = 0.45$

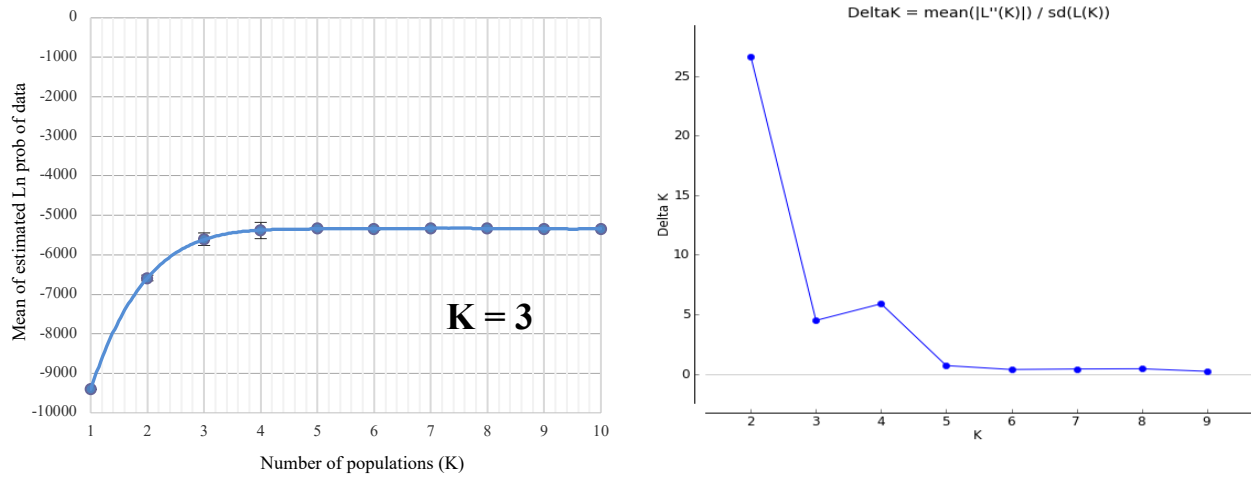

**Fig Q.** Admixture model, no assignment, correlated allele frequency,  $\lambda = 0.45$

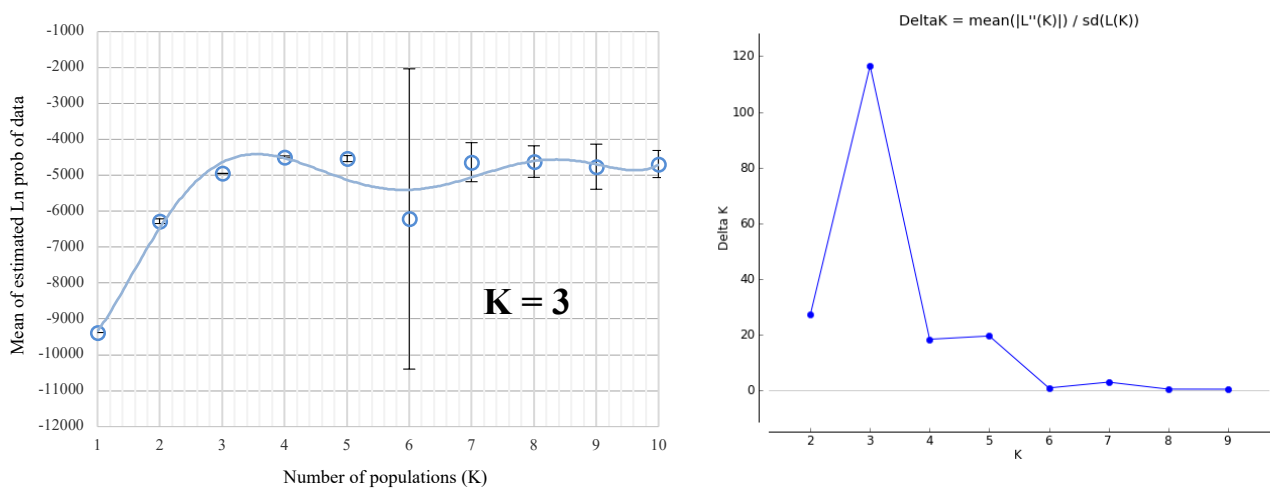

**Fig R.** Admixture model, no assignation, independent allele frequency,  $\lambda = 0.45$

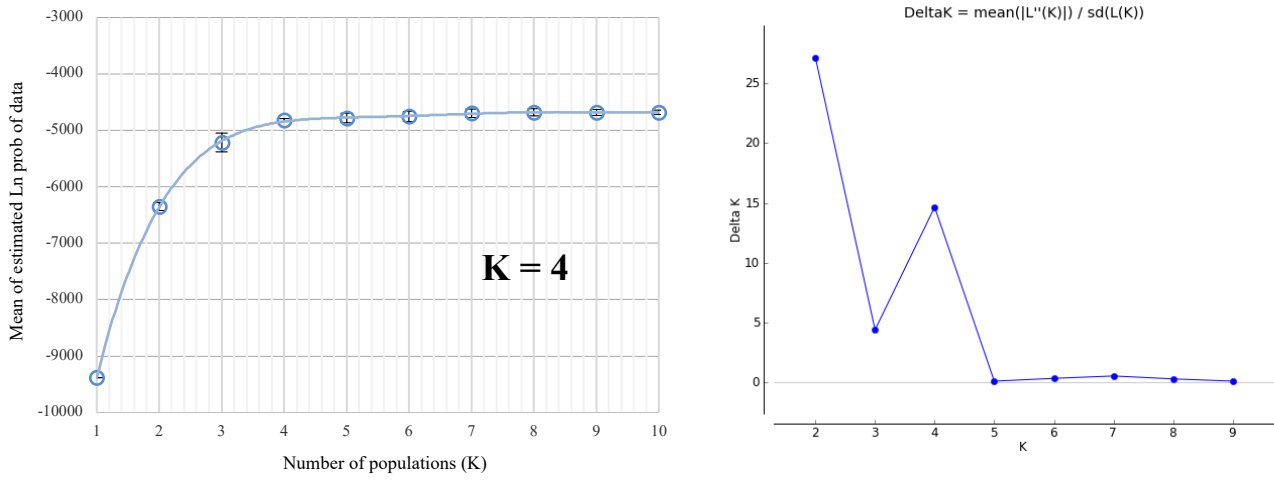

**Fig S.** No admixture model, LOCPRIOR, correlated allele frequency,  $\lambda = 0.45$

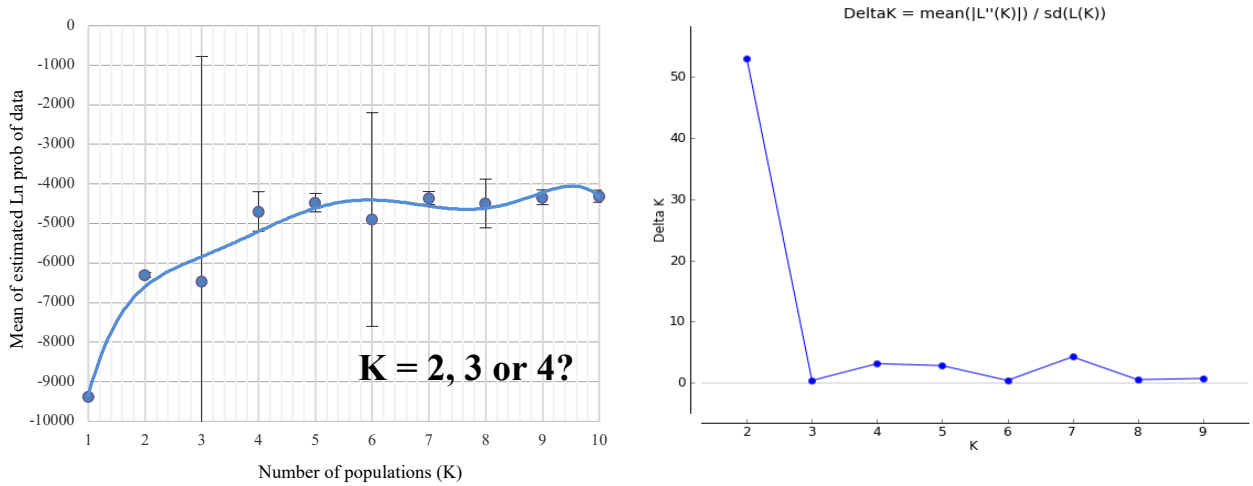

**Fig T.** No admixture model, LOCPRIOR, independent allele frequency,  $\lambda = 0.45$

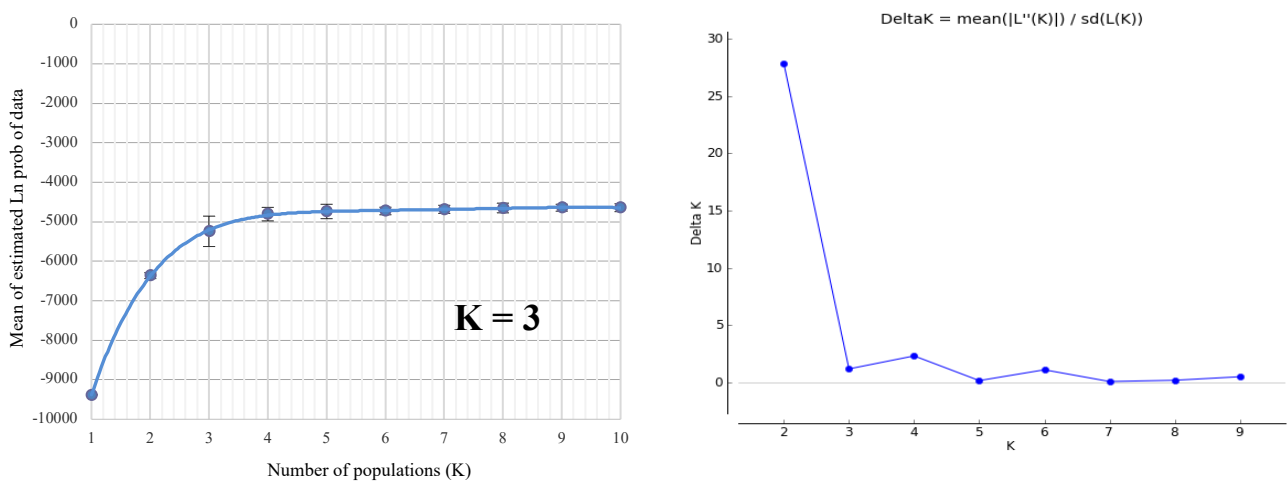

**Fig U.** No admixture model, POPID, correlated allele frequency,  $\lambda = 0.45$

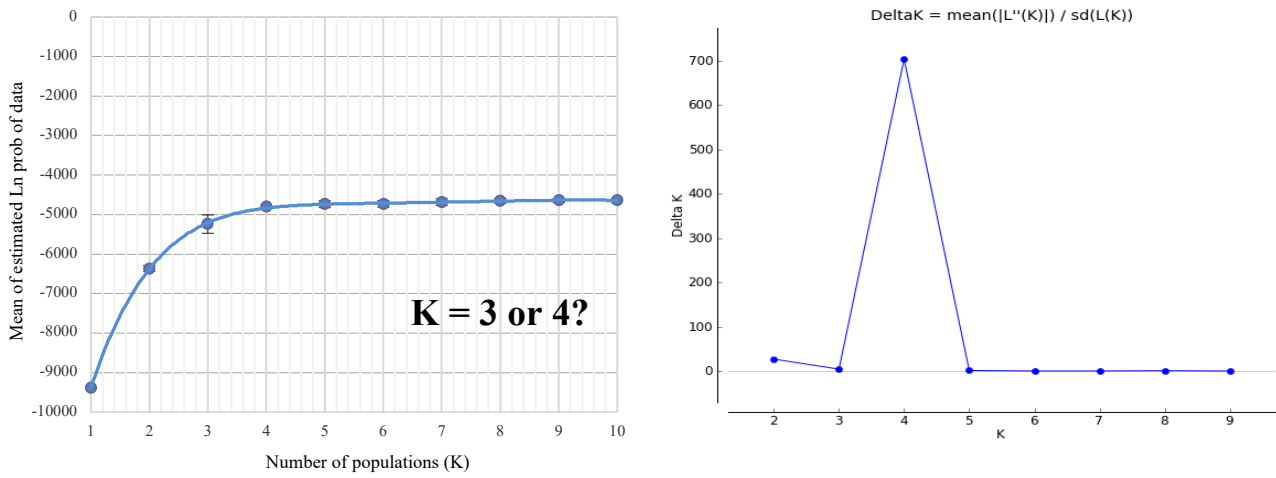

**Fig V.** No admixture model, POPID, independent allele frequency,  $\lambda = 0.45$

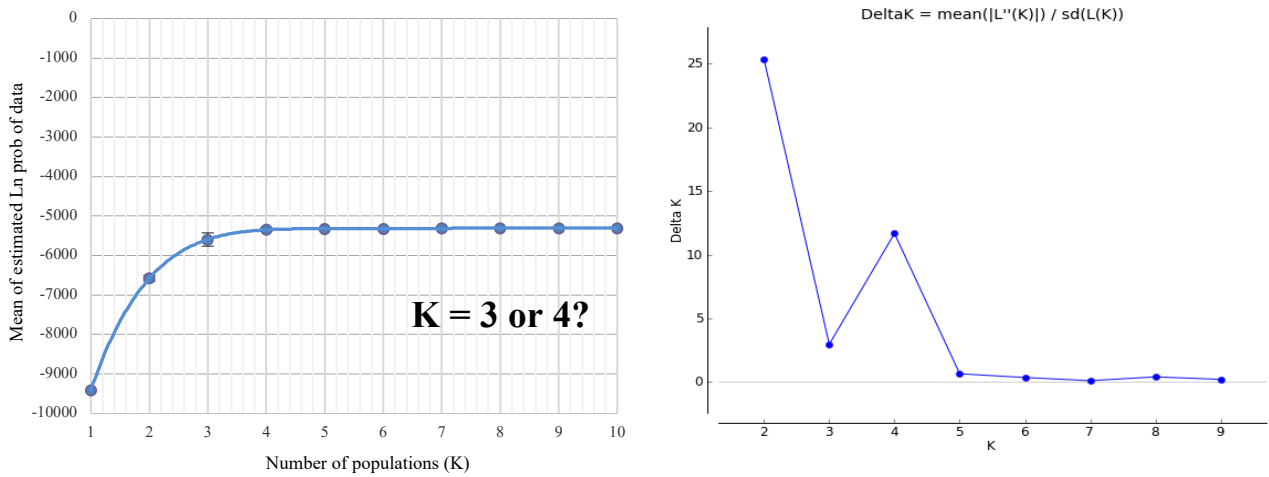

**Fig W.** No admixture model, no assignment, correlated allele frequency,  $\lambda = 0.45$

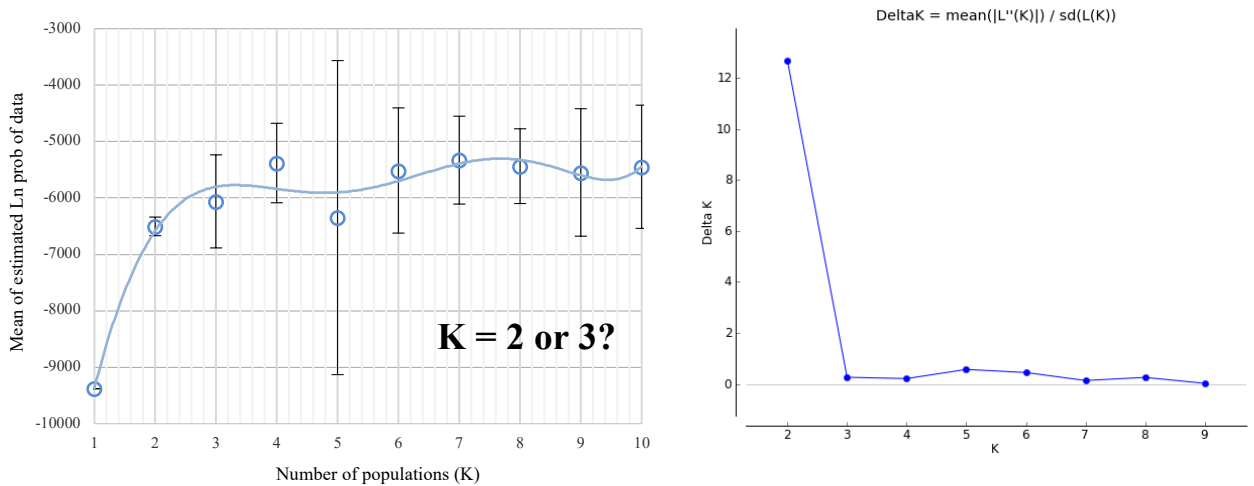



**Fig X.** No admixture model, no assignment, independent allele frequency,  $\lambda = 0.45$

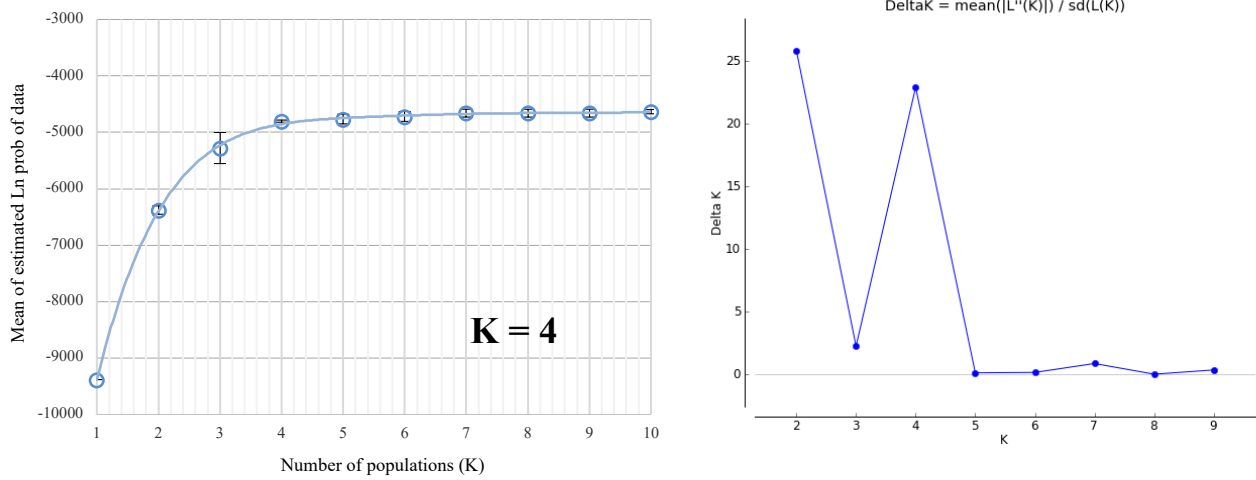

### References:

Earl C, von Holdt CM. STRUCTURE HARVESTER: a website and program for visualizing STRUCTURE output and implementing the Evanno method. *Conserv Genet Resour.* 2011; 4: 359–361.

Pritchard JK, Stephens M, Donnelly P. Inference of population structure using multilocus genotype data. *Genetics* 2000; 155: 945-959.
