# Supplementary material for: A comparative approach for species delimitation based on multiple methods of multi-locus DNA sequence analysis: A case study of the genus Giraffa (Mammalia, Cetartiodactyla)
Source: PubMed Central journal article supplement (PMC7018015; doi:10.1371/journal.pone.0217956), 2020-02-13
Supplement: pone.0217956.s004.pdf [file pone.0217956.s004.pdf]

## S4 Appendix. Genetic distances

### A comparative approach for species delimitation based on multiple methods of multi-locus DNA sequence analysis: a case study of the genus *Giraffa* (Mammalia, Cetartiodactyla)

Alice Petzold<sup>1,2</sup>, Alexandre Hassanin<sup>1,2\*</sup>

1 Institut de Systématique, Évolution, Biodiversité (ISYEB), Sorbonne Université, MNHN, CNRS, EPHE, Paris, France

2 Muséum national d'Histoire naturelle, CP51, 55 rue Buffon - 75005 Paris, France

\*Correspondence: [alexandre.hassanin@mnhn.fr](mailto:alexandre.hassanin@mnhn.fr)

**Table A.** Minimum and maximum pairwise distances (in %), as well as mean distance (between brackets), calculated using the mtDNA-GH82 dataset (1742 nucleotides, *Cytb* and partial control region) both within and between the ten main haplogroups (I-X).

| Taxa                                                | I.                  | II.                 | III.                | IV.                 | V.                  | VI.                 | VIIa.               | VIIb                | VIII.              | IX.                | X.          |
|-----------------------------------------------------|---------------------|---------------------|---------------------|---------------------|---------------------|---------------------|---------------------|---------------------|--------------------|--------------------|-------------|
| <b>I. Northern haplogroup (N)</b> <sup>a</sup>      | <b>2.19</b>         |                     |                     |                     |                     |                     |                     |                     |                    |                    |             |
| <b>II. <i>G. camelopardalis</i> sensu stricto B</b> | NA                  | <b>1.86</b>         |                     |                     |                     |                     |                     |                     |                    |                    |             |
| <b>III. <i>G. reticulata</i></b> <sup>a</sup>       | NA                  | 1.29-2.19<br>(1.67) | <b>1.16</b>         |                     |                     |                     |                     |                     |                    |                    |             |
| <b>IV. <i>G. camelopardalis</i> sensu stricto C</b> | NA                  | NA                  | 0.06-2.06<br>(1.59) | <b>1.73</b>         |                     |                     |                     |                     |                    |                    |             |
| <b>V. <i>G. peralta</i></b>                         | NA                  | NA                  | 1.41-2.19<br>(1.73) | 1.2-1.86<br>(1.4)   | <b>0.26</b>         |                     |                     |                     |                    |                    |             |
| <b>VI. Eastern haplogroup</b> <sup>b</sup>          | 3.34-4.56<br>(3.96) | 3.34-4.56<br>(3.94) | 3.58-4.37<br>(3.98) | 1.65-4.56<br>(3.79) | 3.69-4.43<br>(4.0)  | <b>1.47</b>         |                     |                     |                    |                    |             |
| <b>VIIa Masai I</b>                                 | 3.58-4.56<br>(4.05) | 3.58-4.56<br>(4.05) | 3.7-4.37<br>(4.05)  | 3.34-4.37<br>(3.85) | 3.69-4.12<br>(3.94) | NA                  | <b>0.47</b>         |                     |                    |                    |             |
| <b>VIIb Masai II</b>                                | 3.34-4.37<br>(3.89) | 3.34-4.37<br>(3.87) | 3.58-4.31<br>(3.93) | 3.58-4.56<br>(4.03) | 3.81-4.43<br>(4.11) | NA                  | 0.77-1.47<br>(1.09) | <b>0.1</b>          |                    |                    |             |
| <b>VIII. Southeastern haplogroup</b>                | 3.96-4.69<br>(4.39) | 3.96-4.69<br>(4.4)  | 4.0-4.57<br>(4.37)  | 4.11-4.69<br>(4.49) | 3.69-4.43<br>(4.0)  | 1.17-2.12<br>(1.52) | 1.18-2.12<br>(1.56) | 1.17-1.92<br>(1.49) | <b>0.58</b>        |                    |             |
| <b>IX. Haplogroup E (VI. + VIII.)</b>               | 3.34-4.69<br>(4.16) | 3.34-4.69<br>(4.16) | 3.58-4.57<br>(4.16) | 3.34-4.69<br>(4.16) | 3.69-4.69<br>(4.23) | NA                  | NA                  | NA                  | NA                 | <b>2.11</b>        |             |
| <b>X. Southwestern haplogroup (S)</b>               | 3.28-4.57<br>(3.87) | 3.28-4.57<br>(3.82) | 3.53-4.57<br>(3.97) | 3.28-4.57<br>(3.82) | 3.47-4.37<br>(3.83) | 2.51-3.66<br>(2.9)  | 2.58-3.66<br>(2.97) | 2.51-3.47<br>(2.86) | 2.82-3.8<br>(3.27) | 2.51-3.8<br>(3.07) | <b>0.96</b> |

Roman numerals: respective taxon; NA: not applicable; **boldface**: maximal intrapopulation variation; <sup>a</sup>: excluding the individuals RET8 and RET9; <sup>b</sup>: excluding the individual TIP15.

**Table B.** Minimum and maximum pairwise distances (in %), as well as mean distance (between brackets) calculated from the nuDNA-G137 dataset (16966 nucleotides) both within and between the nine main taxa (I-IX).

| Taxa                                                                  | I.                  | II.                 | III.                | IV.                 | V.                  | VI.                 | VII.                | VIII.       | IX.         |
|-----------------------------------------------------------------------|---------------------|---------------------|---------------------|---------------------|---------------------|---------------------|---------------------|-------------|-------------|
| <b>I. <i>G. camelopardalis</i> sensu stricto A</b>                    | <b>0.27</b>         |                     |                     |                     |                     |                     |                     |             |             |
| <b>II. <i>G. camelopardalis</i> sensu stricto B</b>                   | NA                  | <b>0.13</b>         |                     |                     |                     |                     |                     |             |             |
| <b>III. <i>G. reticulata</i></b>                                      | NA                  | 0.02-0.27<br>(0.14) | <b>0.12</b>         |                     |                     |                     |                     |             |             |
| <b>IV. <i>G. camelopardalis</i> sensu stricto C</b>                   | NA                  | NA                  | 0.02-0.2<br>(0.14)  | <b>0.1</b>          |                     |                     |                     |             |             |
| <b>V. <i>G. peralta</i></b>                                           | NA                  | NA                  | 0.04-0.27<br>(0.14) | 0.01-0.1<br>(0.07)  | <b>0.1</b>          |                     |                     |             |             |
| <b>VI. <i>G. tippelskirchi</i></b>                                    | 0.3-0.54<br>(0.43)  | 0.37-0.54<br>(0.44) | 0.3-0.5<br>(0.4)    | 0.37-0.54<br>(0.45) | 0.37-0.51<br>(0.44) | <b>0.07</b>         |                     |             |             |
| <b>VII. <i>G. camelopardalis</i> s.s. A + <i>G. tippelskirchi</i></b> | NA                  | NA                  | NA                  | NA                  | NA                  | NA                  | <b>0.54</b>         |             |             |
| <b>VIII. <i>G. giraffa</i></b>                                        | 0.35-0.62<br>(0.51) | 0.41-0.62<br>(0.52) | 0.35-0.55<br>(0.47) | 0.45-0.62<br>(0.53) | 0.41-0.58<br>(0.51) | 0.27-0.44<br>(0.35) | 0.27-0.62<br>(0.47) | <b>0.14</b> |             |
| <b>IX. Southern giraffes</b>                                          | 0.33-0.62<br>(0.5)  | 0.37-0.62<br>(0.5)  | 0.33-0.55<br>(0.46) | 0.37-0.62<br>(0.51) | 0.37-0.58<br>(0.5)  | NA                  | NA                  | NA          | <b>0.44</b> |

Roman numerals: respective taxon; NA: not applicable; **boldface**: maximal intraspecific variation
