# Supplementary material for: A comparative approach for species delimitation based on multiple methods of multi-locus DNA sequence analysis: A case study of the genus Giraffa (Mammalia, Cetartiodactyla)
Source: PubMed Central journal article supplement (PMC7018015; doi:10.1371/journal.pone.0217956), 2020-02-13
Supplement: pone.0217956.s005.pdf [file pone.0217956.s005.pdf]

## S5 Appendix. Multispecies coalescent approach

### A comparative approach for species delimitation based on multiple methods of multi-locus DNA sequence analysis: a case study of the genus *Giraffa* (Mammalia, Cetartiodactyla)

Alice Petzold<sup>1,2</sup>, Alexandre Hassanin<sup>1,2\*</sup>

1 Institut de Systématique, Évolution, Biodiversité (ISYEB), Sorbonne Université, MNHN, CNRS, EPHE, Paris, France

2 Muséum national d'Histoire naturelle, CP51, 55 rue Buffon - 75005 Paris, France

\*Correspondence: [alexandre.hassanin@mnhn.fr](mailto:alexandre.hassanin@mnhn.fr)

**Table A.** Summary of BPP results obtained in the analyses of the dataset including 21 introns for 66 giraffes.

| Putative species<br><br>speciesmodelprior                     | Bayesian Phylogenetics and Phylogeography (PP) |     |     |     |     |     |     |     |     |      |     |      |
|---------------------------------------------------------------|------------------------------------------------|-----|-----|-----|-----|-----|-----|-----|-----|------|-----|------|
|                                                               | 3S                                             |     |     | 4S  |     |     | 5S  |     |     | 6S   |     |      |
|                                                               | 1                                              | 2   | 3   | 1   | 2   | 3   | 1   | 2   | 3   | 1    | 2   | 3    |
| (C) <i>camelopardalis</i>                                     | -                                              | -   | -   | -   | -   | -   | -   | -   | -   | -    | -   | -    |
| (R1) <i>rothschildi</i>                                       | -                                              | -   | -   | -   | -   | -   | -   | -   | -   | -    | -   | -    |
| (A1) <i>antiquorum</i>                                        | -                                              | -   | -   | -   | -   | -   | -   | -   | -   | -    | -   | -    |
| (P1) <i>peralta</i>                                           | -                                              | -   | -   | -   | -   | -   | 1.0 | 1.0 | 1.0 | 1.0  | 1.0 | 1.0  |
| (A1 R1) <i>antiquorum &amp; rothschildi</i>                   | -                                              | -   | -   | -   | -   | -   | -   | -   | -   | -    | -   | -    |
| (C R1) <i>camelopardalis &amp; rothschildi</i>                | -                                              | -   | -   | -   | -   | -   | -   | -   | -   | -    | -   | -    |
| (C A1) <i>camelopardalis &amp; antiquorum</i>                 | -                                              | -   | -   | -   | -   | -   | -   | -   | -   | -    | -   | -    |
| (C R1 A1) <i>camelopardalis, rothschildi &amp; antiquorum</i> | -                                              | -   | -   | -   | -   | -   | 1.0 | 1.0 | 1.0 | 1.0  | 1.0 | 1.0  |
| (C R1 A1 P1) <i>Giraffa camelopardalis sensu stricto B</i>    | -                                              | -   | -   | 1.0 | 1.0 | 1.0 | -   | -   | -   | -    | -   | -    |
| (R2) <i>reticulata</i>                                        | -                                              | -   | -   | 1.0 | 1.0 | 1.0 | 1.0 | 1.0 | 1.0 | 1.0  | 1.0 | 1.0  |
| (C R1 A1 P1 R2) <i>Giraffa camelopardalis sensu stricto A</i> | 1.0                                            | 1.0 | 1.0 | -   | -   | -   | -   | -   | -   | -    | -   | -    |
| (T1) <i>tippelskirchi</i>                                     | -                                              | -   | -   | -   | -   | -   | -   | -   | -   | 0.26 | 0.4 | 0.34 |
| (T2) <i>thornicrofti</i>                                      | -                                              | -   | -   | -   | -   | -   | -   | -   | -   | 0.26 | 0.4 | 0.34 |
| (T1 T2) <i>Giraffa tippelskirchi</i>                          | 1.0                                            | 1.0 | 1.0 | 1.0 | 1.0 | 1.0 | 1.0 | 1.0 | 1.0 | 0.74 | 0.6 | 0.65 |
| (G) <i>giraffa</i>                                            | -                                              | -   | -   | -   | -   | -   | -   | -   | -   | -    | -   | -    |
| (A2) <i>angolensis</i>                                        | -                                              | -   | -   | -   | -   | -   | -   | -   | -   | -    | -   | -    |
| (G A2) <i>Giraffa giraffa</i>                                 | 1.0                                            | 1.0 | 1.0 | 1.0 | 1.0 | 1.0 | 1.0 | 1.0 | 1.0 | 1.0  | 1.0 | 1.0  |

PP: average posterior probability values; “-“: not found.

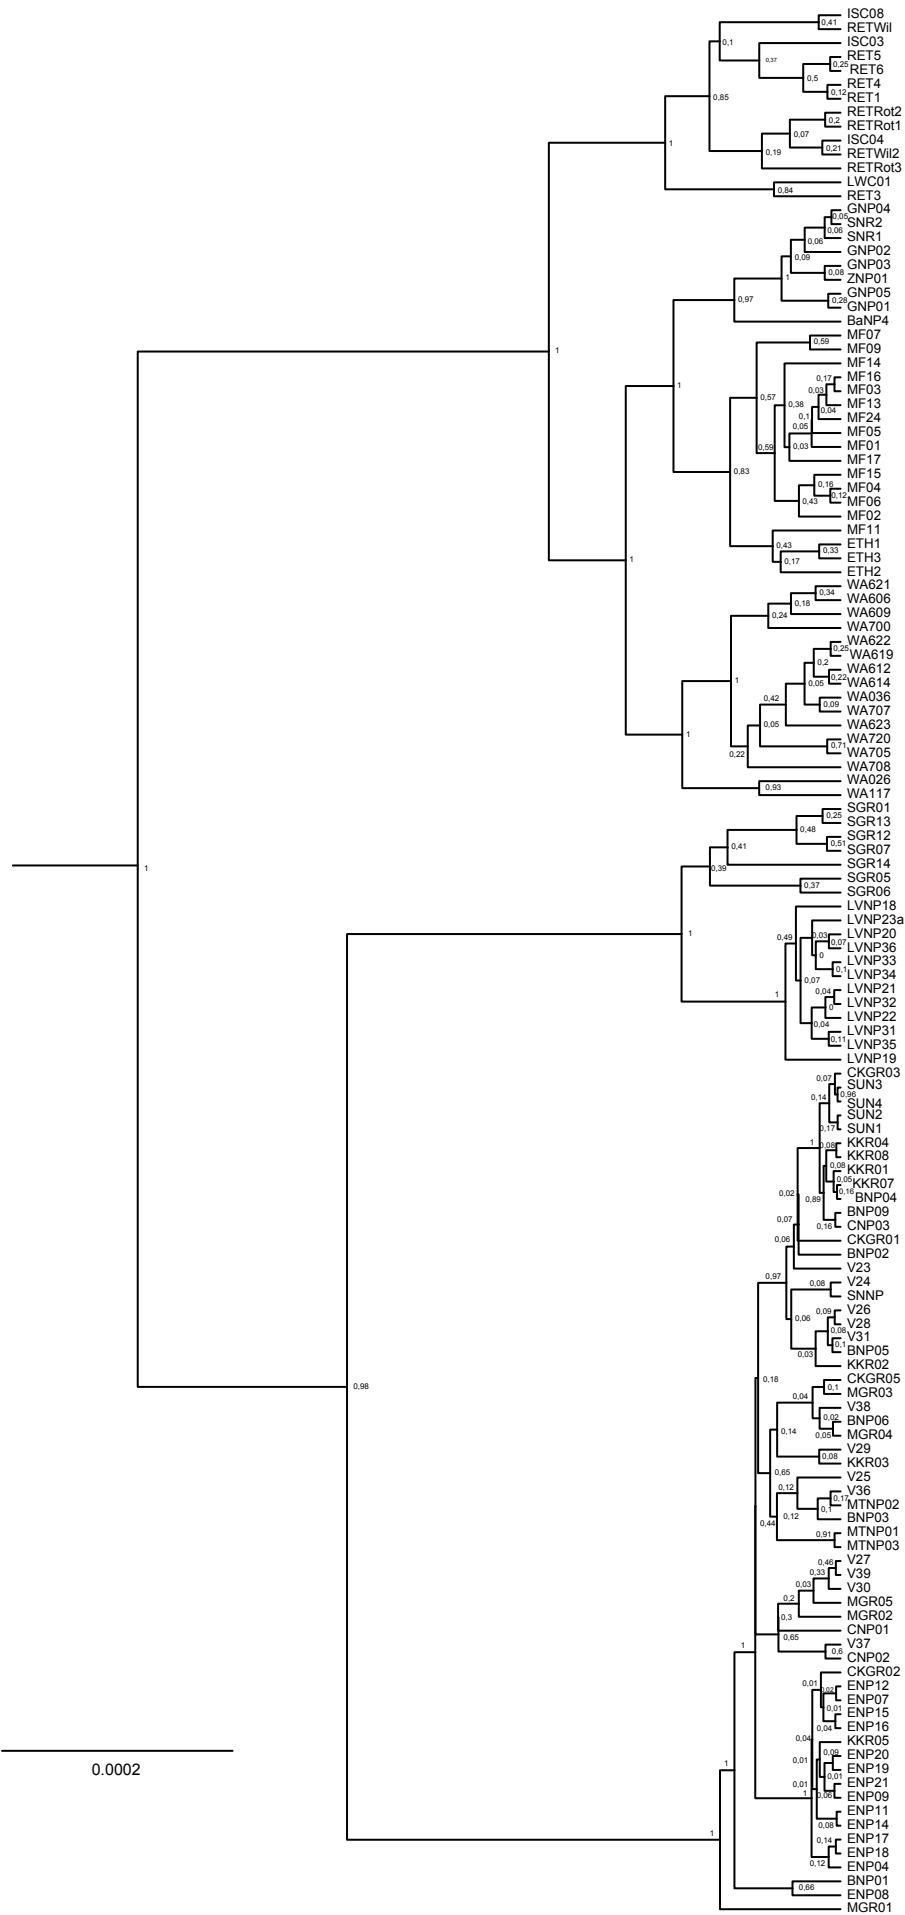

**Fig A.** MSC species-tree constructed from the nuDNA-G274O6 dataset using \*BEAST with the posterior probability values indicated for each node (outgroup taxa *Bos*, *Ovis*, *Okapia* not shown).
