# Supplementary material for: A comparative approach for species delimitation based on multiple methods of multi-locus DNA sequence analysis: A case study of the genus Giraffa (Mammalia, Cetartiodactyla)
Source: PubMed Central journal article supplement (PMC7018015; doi:10.1371/journal.pone.0217956), 2020-02-13
Supplement: pone.0217956.s006.pdf [file pone.0217956.s006.pdf]

## S6 Appendix. Analyses of nuclear haplotypes

### **A comparative approach for species delimitation based on multiple methods of multi-locus DNA sequence analysis: a case study of the genus *Giraffa* (Mammalia, Cetartiodactyla)**

Alice Petzold<sup>1,2</sup>, Alexandre Hassanin<sup>1,2\*</sup>

1 Institut de Systématique, Évolution, Biodiversité (ISYEB), Sorbonne Université, MNHN, CNRS, EPHE, Paris, France

2 Muséum national d'Histoire naturelle, CP51, 55 rue Buffon - 75005 Paris, France

\*Correspondence: [alexandre.hassanin@mnhn.fr](mailto:alexandre.hassanin@mnhn.fr)

#### **List of Locality Abbreviations**

|                 |                                                    |
|-----------------|----------------------------------------------------|
| <b>BaNP</b> =   | Badingilo National Park Sudan                      |
| <b>BNP</b> =    | Bwabwata National Park Namibia                     |
| <b>CNP</b> =    | Chobe National Park Botswana                       |
| <b>ETH</b> =    | Gambella National Park Ethiopia                    |
| <b>ENP</b> =    | Etosha National Park Namibia                       |
| <b>GNP</b> =    | Garamba National Park Democratic Republic of Congo |
| <b>ISC</b> =    | Ishqbini Conservancy, Kenya                        |
| <b>KKR</b> =    | Khamab Kalahari Reserve South Africa               |
| <b>LVNP</b> =   | Luangwa Valley National Park Zambia                |
| <b>LWC</b> =    | Lewa Wildlife Conservancy Kenya                    |
| <b>MGR</b> =    | Moremi Game Reserve Botswana                       |
| <b>MTNP</b> =   | Mosi-oa Tunya National Park Zambia                 |
| <b>MF</b> =     | Murchison Falls National Park Uganda               |
| <b>RET</b> =    | Nuernberg/ Stuttgart Zoo Germany                   |
| <b>RETRot</b> = | Rotterdam Zoo Netherlands                          |
| <b>RETWil</b> = | Wilhelma Zoo Stuttgart Germany                     |
| <b>SGR</b> =    | Selous Game Reserve Tanzania                       |
| <b>SNR</b> =    | Shambe National Park Sudan                         |
| <b>SNNP</b> =   | Sioma Ngwezi National Park Zambia                  |
| <b>SUN</b> =    | Sun Hotel Livingstone Zambia                       |
| <b>WA</b> =     | Koure Niger                                        |
| <b>V</b> =      | Vumbura Concession Botswana                        |
| <b>ZNP</b> =    | Zakouma National Park Chad                         |

**Tables A-U.** Lists of alleles comprised by the haplotypes shown in the median-joining network constructed for each of the 21 nuclear introns (Fig 3).

**Table A.** Overview of the respective alleles comprised by the haplotypes shown in the network of *ACP5*.

| n  | Representative individual      | $\Sigma$ | Included Alleles per Haplotypes                                                                                                                                                                                                                                                                                                                                                                                                                                                                                                                         |
|----|--------------------------------|----------|---------------------------------------------------------------------------------------------------------------------------------------------------------------------------------------------------------------------------------------------------------------------------------------------------------------------------------------------------------------------------------------------------------------------------------------------------------------------------------------------------------------------------------------------------------|
| 1  | <i>rothschildi</i> _MF03_1     | 2        | MF03_1; MF05_1                                                                                                                                                                                                                                                                                                                                                                                                                                                                                                                                          |
| 2  | <i>rothschildi</i> _MF11_1     | 1        | MF11_1                                                                                                                                                                                                                                                                                                                                                                                                                                                                                                                                                  |
| 3  | <i>thornicrofti</i> _LVNP36_1  | 3        | LVNP36_1; MF11_2; RETWil2_2                                                                                                                                                                                                                                                                                                                                                                                                                                                                                                                             |
| 4  | <i>thornicrofti</i> _LVNP22_1  | 9        | LVNP22_1; LVNP23a_1; LVNP23a_2; LVNP31_1; LVNP31_2; LVNP32_1; LVNP32_2; LVNP34_1; LVNP34_2                                                                                                                                                                                                                                                                                                                                                                                                                                                              |
| 5  | <i>thornicrofti</i> _LVNP33_1  | 2        | LVNP33_1; LVNP33_2                                                                                                                                                                                                                                                                                                                                                                                                                                                                                                                                      |
| 6  | <i>thornicrofti</i> _LVNP20_1  | 19       | LVNP20_1; LVNP20_2; LVNP22_2; LVNP35_1; LVNP35_2; LVNP36_2; SGR01_1; SGR01_2; SGR05_1; SGR05_2; SGR06_1; SGR06_2; SGR07_1; SGR12_1; SGR12_2; SGR13_1; SGR13_2; SGR14_1; SGR14_2                                                                                                                                                                                                                                                                                                                                                                         |
| 7  | <i>thornicrofti</i> _LVNP18_1  | 6        | LVNP18_1; LVNP18_2; LVNP19_1; LVNP19_2; LVNP21_1; LVNP21_2                                                                                                                                                                                                                                                                                                                                                                                                                                                                                              |
| 8  | <i>tippelskichi</i> _SGR07_2   | 1        | SGR07_2                                                                                                                                                                                                                                                                                                                                                                                                                                                                                                                                                 |
| 9  | <i>rothschildi</i> _MF14_1     | 2        | MF14_1; WA705_1                                                                                                                                                                                                                                                                                                                                                                                                                                                                                                                                         |
| 10 | <i>reticulata</i> _RETWil_1    | 2        | RETWil_1; RETWil_2                                                                                                                                                                                                                                                                                                                                                                                                                                                                                                                                      |
| 11 | <i>reticulata</i> _RET5_2      | 1        | RET5_2                                                                                                                                                                                                                                                                                                                                                                                                                                                                                                                                                  |
| 12 | <i>peralta</i> _WA708_1        | 1        | WA708_1                                                                                                                                                                                                                                                                                                                                                                                                                                                                                                                                                 |
| 13 | <i>antiquorum</i> _GNP03_2     |          | GNP03_2                                                                                                                                                                                                                                                                                                                                                                                                                                                                                                                                                 |
| 14 | <i>camelopardalis</i> _ETH1_1  | 63       | ETH1_1; ETH1_2; ETH2_1; ETH2_2; GNP01_1; GNP01_2; GNP02_1; GNP02_2; GNP03_1; GNP04_1; GNP05_1; GNP05_2; MF01_1; MF01_2; MF02_1; MF02_2; MF03_2; MF04_1; MF04_2; MF05_2; MF06_1; MF06_2; MF07_1; MF07_2; MF09_1; MF09_2; MF13_1; MF13_2; MF14_2; MF15_1; MF15_2; MF16_1; MF16_2; MF17_1; MF17_2; MF24_1; MF24_2; RETRot3_1; SNR1_1; SNR2_1; SNR2_2; WA026_1; WA036_1; WA036_2; WA117_1; WA606_1; WA606_2; WA614_1; WA619_1; WA621_1; WA621_2; WA622_1; WA623_1; WA623_2; WA700_1; WA700_2; WA705_2; WA707_1; WA707_2; WA708_2; WA720_1; WA720_2; ZNP01_1 |
| 15 | <i>reticulata</i> _RET1_1      | 20       | RET1_1; RET1_2; RET3_1; RET3_2; RET4_1; RET4_2; RET5_1; RET6_1; RET6_2; RETRot1_1; RETRot1_2; RETRot2_1; RETRot2_2; RETRot3_2; ISC03_1; ISC03_2; ISC04_1; ISC04_2; LWC01_1; LWC01_2                                                                                                                                                                                                                                                                                                                                                                     |
| 16 | <i>reticulata</i> _RETWil2_1   | 1        | RETWil2_1                                                                                                                                                                                                                                                                                                                                                                                                                                                                                                                                               |
| 17 | <i>reticulata</i> _ISC08_1     | 1        | ISC08_1                                                                                                                                                                                                                                                                                                                                                                                                                                                                                                                                                 |
| 18 | <i>reticulata</i> _ISC08_2     | 1        | ISC08_2                                                                                                                                                                                                                                                                                                                                                                                                                                                                                                                                                 |
| 19 | <i>camelopardalis</i> _BaNP4_1 | 16       | BaNP4_1; BaNP4_2; ETH3_1; ETH3_2; GNP04_2; SNR1_2; WA026_2; WA117_2; WA609_1; WA609_2; WA612_1; WA612_2; WA614_2; WA619_2; WA622_2; ZNP01_2                                                                                                                                                                                                                                                                                                                                                                                                             |
| 20 | <i>giraffa</i> _V24_2          | 1        | V24_2                                                                                                                                                                                                                                                                                                                                                                                                                                                                                                                                                   |
| 21 | <i>giraffa</i> _V25_2          | 1        | V25_2                                                                                                                                                                                                                                                                                                                                                                                                                                                                                                                                                   |
| 22 | <i>giraffa</i> _MGR05_2        | 5        | MGR05_2; MGR05_2; MTNP01_2; MTNP03_2; SNNP_2                                                                                                                                                                                                                                                                                                                                                                                                                                                                                                            |
| 23 | <i>giraffa</i> _CNP03_2        | 9        | CNP03_2; MGR01_1; MGR01_2; MGR02_2; V27_2; V37_1; V37_2; V38_2; V39_2                                                                                                                                                                                                                                                                                                                                                                                                                                                                                   |
| 24 | <i>angolensis</i> _ENP07_2     | 4        | ENP07_2; ENP11_2; ENP14_2; ENP17_2                                                                                                                                                                                                                                                                                                                                                                                                                                                                                                                      |

|    |                         |    |                                                                                                                                                                                                                                                                                                                                                                                                                                                                                                                                                                                                                                                                                                                                                                                                                                                                                   |
|----|-------------------------|----|-----------------------------------------------------------------------------------------------------------------------------------------------------------------------------------------------------------------------------------------------------------------------------------------------------------------------------------------------------------------------------------------------------------------------------------------------------------------------------------------------------------------------------------------------------------------------------------------------------------------------------------------------------------------------------------------------------------------------------------------------------------------------------------------------------------------------------------------------------------------------------------|
| 25 | <i>giraffa</i> _CNP01_1 | 4  | CNP01_1; CNP01_2; V23_2; V36_2                                                                                                                                                                                                                                                                                                                                                                                                                                                                                                                                                                                                                                                                                                                                                                                                                                                    |
| 26 | <i>giraffa</i> _BNP09_2 | 1  | BNP09_2                                                                                                                                                                                                                                                                                                                                                                                                                                                                                                                                                                                                                                                                                                                                                                                                                                                                           |
| 27 | <i>giraffa</i> _BNP01_1 | 98 | BNP01_1; BNP01_2; BNP02_1; BNP02_2; BNP03_1; BNP03_2; BNP04_1; BNP04_2; BNP05_1; BNP05_2; BNP06_1; BNP06_2; BNP09_1; CKGR01_1; CKGR01_2; CKGR02_1; CKGR02_2; CKGR03_1; CKGR03_2; CKGR05_1; CKGR05_2; CNP02_1; CNP02_2; CNP03_1; ENP04_1; ENP04_2; ENP07_1; ENP08_1; ENP08_2; ENP09_1; ENP09_2; ENP11_1; ENP12_1; ENP12_2; ENP14_1; ENP15_1; ENP15_2; ENP16_1; ENP16_2; ENP17_1; ENP18_1; ENP18_2; ENP19_1; ENP19_2; ENP20_1; ENP20_2; ENP21_1; ENP21_2; KKR01_1; KKR01_2; KKR02_1; KKR02_2; KKR03_1; KKR03_2; KKR04_1; KKR04_2; KKR05_1; KKR05_2; KKR07_1; KKR07_2; KKR08_1; KKR08_2; MGR02_1; MGR03_1; MGR03_2; MGR04_1; MGR04_2; MGR05_1; MTNP01_1; MTNP02_1; MTNP02_2; MTNP03_1; SNNP_1; SUN1_1; SUN1_2; SUN2_1; SUN2_2; SUN3_1; SUN3_2; SUN4_1; SUN4_2; V23_1; V24_1; V25_1; V26_1; V26_2; V27_1; V28_1; V28_2; V29_1; V29_2; V30_1; V30_2; V31_1; V31_2; V36_1; V38_1; V39_1 |

**Table B.** Overview of the respective alleles comprised by the haplotypes shown in the network of *Clorf74*.

| n  | Representative individual      | $\Sigma$ | Included Alleles per Haplotypes                                                                                                                                                                                                                                                                                                                                                                                                                                                                                                                                                                                                                                                                              |
|----|--------------------------------|----------|--------------------------------------------------------------------------------------------------------------------------------------------------------------------------------------------------------------------------------------------------------------------------------------------------------------------------------------------------------------------------------------------------------------------------------------------------------------------------------------------------------------------------------------------------------------------------------------------------------------------------------------------------------------------------------------------------------------|
| 1  | <i>reticulata</i> _RET1_2      | 5        | RET1_2; RET4_2; RET5_2; RET6_1; RET6_2                                                                                                                                                                                                                                                                                                                                                                                                                                                                                                                                                                                                                                                                       |
| 2  | <i>reticulata</i> _ISC03_2     | 1        | ISC03_2                                                                                                                                                                                                                                                                                                                                                                                                                                                                                                                                                                                                                                                                                                      |
| 3  | <i>rothschildi</i> _MF01_1     | 12       | MF01_1; MF01_2; MF02_2; MF03_1; MF03_2; MF05_2; MF13_1; MF13_2; MF16_1; MF16_2; MF17_2; RETWil2_2                                                                                                                                                                                                                                                                                                                                                                                                                                                                                                                                                                                                            |
| 4  | <i>rothschildi</i> _MF05_1     | 8        | MF05_1; MF06_1; MF06_2; MF15_1; MF15_2; RET3_2; RETRot3_2; LWC01_2                                                                                                                                                                                                                                                                                                                                                                                                                                                                                                                                                                                                                                           |
| 5  | <i>rothschildi</i> _MF17_1     | 1        | MF17_1                                                                                                                                                                                                                                                                                                                                                                                                                                                                                                                                                                                                                                                                                                       |
| 6  | <i>reticulata</i> _RETRot1_2   | 5        | RETRot1_2; RETWil_2; RETWil2_1; ISC04_2; ISC08_2                                                                                                                                                                                                                                                                                                                                                                                                                                                                                                                                                                                                                                                             |
| 7  | <i>thornicrofti</i> _LVNP18_1  | 36       | LVNP18_1; LVNP18_2; LVNP19_1; LVNP19_2; LVNP20_1; LVNP20_2; LVNP21_1; LVNP21_2; LVNP22_1; LVNP22_2; LVNP23a_1; LVNP23a_2; LVNP31_1; LVNP31_2; LVNP32_1; LVNP32_2; LVNP33_1; LVNP33_2; LVNP34_1; LVNP34_2; LVNP35_1; LVNP35_2; LVNP36_1; LVNP36_2; SGR01_1; SGR01_2; SGR05_1; SGR05_2; SGR06_1; SGR07_1; SGR07_2; SGR12_1; SGR12_2; SGR13_1; SGR13_2; SGR14_2                                                                                                                                                                                                                                                                                                                                                 |
| 8  | <i>camelopardalis</i> _BaNP4_1 | 4        | BaNP4_1; BaNP4_2; MF07_1; MF07_2                                                                                                                                                                                                                                                                                                                                                                                                                                                                                                                                                                                                                                                                             |
| 9  | <i>camelopardalis</i> _ETH1_1  | 78       | ETH1_1; ETH1_2; ETH2_1; ETH2_2; ETH3_1; ETH3_2; GNP01_1; GNP01_2; GNP02_1; GNP02_2; GNP03_1; GNP03_2; GNP04_1; GNP04_2; GNP05_1; GNP05_2; MF02_1; MF04_1; MF04_2; MF09_1; MF09_2; MF11_1; MF11_2; MF14_1; MF14_2; MF24_1; MF24_2; RET1_1; RET3_1; RET4_1; RET5_1; RETRot1_1; RETRot2_1; RETRot2_2; RETRot3_1; RETWil_1; ISC03_1; ISC04_1; ISC08_1; LWC01_1; SNR1_1; SNR1_2; SNR2_1; SNR2_2; WA026_1; WA026_2; WA036_1; WA036_2; WA117_1; WA117_2; WA606_1; WA606_2; WA609_1; WA609_2; WA612_1; WA612_2; WA614_1; WA614_2; WA619_1; WA619_2; WA621_1; WA621_2; WA622_1; WA622_2; WA623_1; WA623_2; WA700_1; WA700_2; WA705_1; WA705_2; WA707_1; WA707_2; WA708_1; WA708_2; WA720_1; WA720_2; ZNP01_1; ZNP01_2 |
| 10 | <i>tippelskichi</i> _SGR06_2   | 1        | SGR06_2                                                                                                                                                                                                                                                                                                                                                                                                                                                                                                                                                                                                                                                                                                      |

|    |                              |     |                                                                                                                                                                                                                                                                                                                                                                                                                                                                                                                                                                                                                                                                                                                                                                                                                                                                                                                                                                                                                                                                                          |
|----|------------------------------|-----|------------------------------------------------------------------------------------------------------------------------------------------------------------------------------------------------------------------------------------------------------------------------------------------------------------------------------------------------------------------------------------------------------------------------------------------------------------------------------------------------------------------------------------------------------------------------------------------------------------------------------------------------------------------------------------------------------------------------------------------------------------------------------------------------------------------------------------------------------------------------------------------------------------------------------------------------------------------------------------------------------------------------------------------------------------------------------------------|
| 11 | <i>tippelskichi</i> _SGR14_1 | 1   | SGR14_1                                                                                                                                                                                                                                                                                                                                                                                                                                                                                                                                                                                                                                                                                                                                                                                                                                                                                                                                                                                                                                                                                  |
| 12 | <i>giraffa</i> _BNP01_1      | 122 | BNP01_1; BNP01_2; BNP02_1; BNP02_2; BNP03_1; BNP03_2; BNP04_1; BNP04_2; BNP05_1; BNP05_2; BNP06_1; BNP06_2; BNP09_1; BNP09_2; CKGR01_1; CKGR01_2; CKGR02_1; CKGR02_2; CKGR03_1; CKGR03_2; CKGR05_1; CKGR05_2; CNP01_1; CNP01_2; CNP02_1; CNP02_2; CNP03_1; CNP03_2; ENP04_1; ENP04_2; ENP07_1; ENP07_2; ENP08_1; ENP08_2; ENP09_1; ENP09_2; ENP11_1; ENP11_2; ENP12_1; ENP12_2; ENP14_1; ENP14_2; ENP15_1; ENP15_2; ENP16_1; ENP16_2; ENP17_1; ENP17_2; ENP18_1; ENP18_2; ENP19_1; ENP19_2; ENP20_1; ENP20_2; ENP21_1; ENP21_2; KKR01_1; KKR01_2; KKR02_1; KKR02_2; KKR03_1; KKR03_2; KKR04_1; KKR04_2; KKR05_1; KKR05_2; KKR07_1; KKR07_2; KKR08_1; KKR08_2; MGR01_1; MGR01_2; MGR02_1; MGR02_2; MGR03_1; MGR03_2; MGR04_1; MGR04_2; MGR05_1; MGR05_2; MTNP01_1; MTNP01_2; MTNP02_1; MTNP02_2; MTNP03_1; MTNP03_2; SNNP_1; SNNP_2; SUN1_1; SUN1_2; SUN2_1; SUN2_2; SUN3_1; SUN3_2; SUN4_1; SUN4_2; V23_1; V23_2; V24_1; V24_2; V25_1; V25_2; V26_1; V26_2; V27_1; V27_2; V28_1; V28_2; V29_1; V29_2; V30_1; V30_2; V31_1; V31_2; V36_1; V36_2; V37_1; V37_2; V38_1; V38_2; V39_1; V39_2 |

**Table C.** Overview of the respective alleles comprised by the haplotypes shown in the network of *CCT2*.

| n | Representative individual      | $\Sigma$ | Included Alleles per Haplotypes                                                                                                                                                                                                                                                                                                                                                                                                                                                                                                                                                                                                                                                                                                                                                                                                                                                                                                                                                                                                                                                                                                                                                                                                                                                                                                                                                                                      |
|---|--------------------------------|----------|----------------------------------------------------------------------------------------------------------------------------------------------------------------------------------------------------------------------------------------------------------------------------------------------------------------------------------------------------------------------------------------------------------------------------------------------------------------------------------------------------------------------------------------------------------------------------------------------------------------------------------------------------------------------------------------------------------------------------------------------------------------------------------------------------------------------------------------------------------------------------------------------------------------------------------------------------------------------------------------------------------------------------------------------------------------------------------------------------------------------------------------------------------------------------------------------------------------------------------------------------------------------------------------------------------------------------------------------------------------------------------------------------------------------|
| 1 | <i>reticulata</i> _RETRot1_1   | 5        | RETRot1_1; RETRot1_2; RETRot2_1; RETRot2_2; RETWil2_2                                                                                                                                                                                                                                                                                                                                                                                                                                                                                                                                                                                                                                                                                                                                                                                                                                                                                                                                                                                                                                                                                                                                                                                                                                                                                                                                                                |
| 2 | <i>reticulata</i> _RET4_2      | 4        | RET4_2; RETRot3_2; RETWil2_1; ISC04_2                                                                                                                                                                                                                                                                                                                                                                                                                                                                                                                                                                                                                                                                                                                                                                                                                                                                                                                                                                                                                                                                                                                                                                                                                                                                                                                                                                                |
| 3 | <i>antiquorum</i> _SNR_2       | 1        | SNR_2                                                                                                                                                                                                                                                                                                                                                                                                                                                                                                                                                                                                                                                                                                                                                                                                                                                                                                                                                                                                                                                                                                                                                                                                                                                                                                                                                                                                                |
| 4 | <i>peralta</i> _WA026_2        | 1        | WA026_2                                                                                                                                                                                                                                                                                                                                                                                                                                                                                                                                                                                                                                                                                                                                                                                                                                                                                                                                                                                                                                                                                                                                                                                                                                                                                                                                                                                                              |
| 5 | <i>camelopardalis</i> _BaNP4_1 | 177      | BaNP4_1; BNP02_1; BNP02_2; BNP03_1; BNP03_2; BNP04_1; BNP04_2; BNP05_1; BNP05_2; BNP06_1; BNP06_2; BNP09_1; BNP09_2; CKGR01_1; CKGR01_2; CKGR02_1; CKGR02_2; CKGR03_1; CKGR03_2; CKGR05_1; CKGR05_2; CNP01_1; CNP01_2; CNP02_1; CNP02_2; CNP03_1; CNP03_2; ENP04_1; ENP04_2; ENP07_1; ENP07_2; ENP09_1; ENP09_2; ENP11_1; ENP11_2; ENP12_1; ENP12_2; ENP14_1; ENP14_2; ENP15_1; ENP15_2; ENP16_1; ENP16_2; ENP17_1; ENP17_2; ENP18_1; ENP18_2; ENP19_1; ENP19_2; ENP20_1; ENP20_2; ENP21_1; ENP21_2; GNP01_1; GNP05_1; GNP05_2; KKR01_1; KKR01_2; KKR02_1; KKR02_2; KKR03_1; KKR03_2; KKR04_1; KKR04_2; KKR05_1; KKR05_2; KKR07_1; KKR07_2; KKR08_1; KKR08_2; LVNP18_1; LVNP18_2; LVNP19_1; LVNP19_2; LVNP20_1; LVNP20_2; LVNP21_1; LVNP21_2; LVNP22_1; LVNP22_2; LVNP23a_1; LVNP23a_2; LVNP31_1; LVNP31_2; LVNP32_1; LVNP32_2; LVNP33_1; LVNP33_2; LVNP34_1; LVNP34_2; LVNP35_1; LVNP35_2; LVNP36_1; LVNP36_2; MF01_1; MF03_1; MF06_1; MGR01_1; MGR01_2; MGR02_1; MGR02_2; MGR03_1; MGR03_2; MGR04_1; MGR04_2; MGR05_1; MGR05_2; MTNP01_1; MTNP01_2; MTNP02_1; MTNP02_2; MTNP03_1; MTNP03_2; RET1_1; RET5_1; RET6_1; RETWil_1; SGR01_1; SGR01_2; SGR05_1; SGR05_2; SGR06_1; SGR06_2; SGR07_1; SGR07_2; SGR12_1; SGR12_2; SGR13_1; SGR13_2; SGR14_1; SGR14_2; SNNP_1; SNNP_2; SNR1_1; SUN1_1; SUN1_2; SUN2_1; SUN2_2; SUN3_1; SUN3_2; SUN4_1; SUN4_2; V23_1; V23_2; V24_1; V24_2; V25_1; V25_2; V26_1; V26_2; V27_1; |

|   |                                |    |                                                                                                                                                                                                                                                                                                                                                                                                                                                                                                                                                                                                                                                                                                                                                                |
|---|--------------------------------|----|----------------------------------------------------------------------------------------------------------------------------------------------------------------------------------------------------------------------------------------------------------------------------------------------------------------------------------------------------------------------------------------------------------------------------------------------------------------------------------------------------------------------------------------------------------------------------------------------------------------------------------------------------------------------------------------------------------------------------------------------------------------|
|   |                                |    | V27_2; V28_1; V28_2; V29_1; V29_2; V30_1; V30_2; V31_1; V31_2; V36_1; V36_2; V37_1; V37_2; V38_1; V38_2; V39_1; V39_2; WA026_1; WA036_1; WA117_1; WA117_2; WA606_1; WA707_1; WA708_1; WA708_2; ZNP01_1                                                                                                                                                                                                                                                                                                                                                                                                                                                                                                                                                         |
| 6 | <i>camelopardalis</i> _BaNP4_2 | 86 | BaNP4_2; BNP01_1; BNP01_2; ENP08_1; ENP08_2; ETH1_1; ETH1_2; ETH2_1; ETH2_2; ETH3_1; ETH3_2; GNP01_2; GNP02_1; GNP02_2; GNP03_1; GNP03_2; GNP04_1; GNP04_2; MF01_2; MF02_1; MF02_2; MF03_2; MF04_1; MF04_2; MF05_1; MF05_2; MF06_2; MF07_1; MF07_2; MF09_1; MF09_2; MF11_1; MF11_2; MF13_1; MF13_2; MF14_1; MF14_2; MF15_1; MF15_2; MF16_1; MF16_2; MF17_1; MF17_2; MF24_1; MF24_2; RET1_2; RET3_1; RET3_2; RET4_1; RET5_2; RET6_2; RETRot3_1; RETWil_2; ISC03_1; ISC03_2; ISC04_1; ISC08_1; ISC08_2; LWC01_1; LWC01_2; SNR1_2; SNR2_1; WA036_2; WA606_2; WA609_1; WA609_2; WA612_1; WA612_2; WA614_1; WA614_2; WA619_1; WA619_2; WA621_1; WA621_2; WA622_1; WA622_2; WA623_1; WA623_2; WA700_1; WA700_2; WA705_1; WA705_2; WA707_2; WA720_1; WA720_2; ZNP01_2 |

**Table D.** Overview of the respective alleles comprised by the haplotypes shown in the network of *COL5A2*.

| n  | Representative individual      | $\Sigma$ | Included Alleles per Haplotypes                                                                                                                                                                                                                                                                                                                                                                                                                            |
|----|--------------------------------|----------|------------------------------------------------------------------------------------------------------------------------------------------------------------------------------------------------------------------------------------------------------------------------------------------------------------------------------------------------------------------------------------------------------------------------------------------------------------|
| 1  | <i>reticulata</i> _RETRot3_2   | 2        | RETRot3_2; RETWil_1                                                                                                                                                                                                                                                                                                                                                                                                                                        |
| 2  | <i>reticulata</i> _RETRot3_1   | 1        | RETRot3_1                                                                                                                                                                                                                                                                                                                                                                                                                                                  |
| 3  | <i>reticulata</i> _ISC08_2     | 1        | ISC08_2                                                                                                                                                                                                                                                                                                                                                                                                                                                    |
| 4  | <i>reticulata</i> _RETWil_2    | 1        | RETWil_2                                                                                                                                                                                                                                                                                                                                                                                                                                                   |
| 5  | <i>reticulata</i> _RET1_2      | 3        | RET1_2; RET4_2; ISC03_2                                                                                                                                                                                                                                                                                                                                                                                                                                    |
| 6  | <i>reticulata</i> _RET3_1      | 8        | RET3_1; RET4_1; RET5_1; RET5_2; RET6_1; ISC03_1; ISC04_1; LWC01_1                                                                                                                                                                                                                                                                                                                                                                                          |
| 7  | <i>peralta</i> _WA707_1        | 2        | WA707_1; WA707_2                                                                                                                                                                                                                                                                                                                                                                                                                                           |
| 8  | <i>peralta</i> _WA117_1        | 1        | WA117_1                                                                                                                                                                                                                                                                                                                                                                                                                                                    |
| 9  | <i>peralta</i> _WA117_2        | 1        | WA117_2                                                                                                                                                                                                                                                                                                                                                                                                                                                    |
| 10 | <i>peralta</i> _WA623_2        | 1        | WA623_2                                                                                                                                                                                                                                                                                                                                                                                                                                                    |
| 11 | <i>peralta</i> _WA026_1        | 11       | WA026_1; WA026_2; WA036_1; WA036_2; WA612_2; WA619_2; WA622_1; WA622_2; WA623_1; WA700_2; WA720_2                                                                                                                                                                                                                                                                                                                                                          |
| 12 | <i>camelopardalis</i> _BaNP4_1 | 17       | BaNP4_1; BaNP4_2; MF01_1; MF03_1; MF04_1; MF04_2; MF06_1; MF09_1; MF13_1; MF14_1; MF14_2; MF15_1; MF15_2; MF16_1; MF16_2; MF17_1; MF24_1                                                                                                                                                                                                                                                                                                                   |
| 13 | <i>camelopardalis</i> _ETH1_1  | 51       | ETH1_1; ETH1_2; ETH2_1; ETH2_2; ETH3_1; ETH3_2; GNP01_1; GNP01_2; GNP02_1; GNP02_2; GNP03_1; GNP03_2; GNP04_1; GNP04_2; GNP05_1; GNP05_2; MF01_2; MF03_2; MF05_1; MF05_2; MF06_2; MF07_1; MF07_2; MF11_1; MF11_2; MF17_2; MF24_2; RETRot1_1; RETRot2_1; RETRot2_2; SNR1_1; SNR1_2; SNR2_1; SNR2_2; WA606_1; WA606_2; WA609_1; WA612_1; WA614_1; WA614_2; WA619_1; WA621_1; WA621_2; WA700_1; WA705_1; WA705_2; WA708_1; WA708_2; WA720_1; ZNP01_1; ZNP01_2 |
| 14 | <i>rothschildi</i> _MF02_1     | 2        | MF02_1; MF13_2                                                                                                                                                                                                                                                                                                                                                                                                                                             |
| 15 | <i>rothschildi</i> _MF02_2     | 7        | MF02_2; MF09_2; RET3_2; RETWil2_1; RETWil2_2; LWC01_2; WA609_2                                                                                                                                                                                                                                                                                                                                                                                             |

|    |                               |     |                                                                                                                                                                                                                                                                                                                                                                                                                                                                                                                                                                                                                                                                                                                                                                                                                                                                                                                                                                                                                                                                      |
|----|-------------------------------|-----|----------------------------------------------------------------------------------------------------------------------------------------------------------------------------------------------------------------------------------------------------------------------------------------------------------------------------------------------------------------------------------------------------------------------------------------------------------------------------------------------------------------------------------------------------------------------------------------------------------------------------------------------------------------------------------------------------------------------------------------------------------------------------------------------------------------------------------------------------------------------------------------------------------------------------------------------------------------------------------------------------------------------------------------------------------------------|
| 16 | <i>thornicrofti</i> _LVNP18_1 | 33  | LVNP18_1; LVNP18_2; LVNP19_1; LVNP19_2; LVNP20_1; LVNP20_2; LVNP21_1; LVNP21_2; LVNP22_1; LVNP22_2; LVNP23a_1; LVNP23a_2; LVNP31_1; LVNP32_1; LVNP32_2; LVNP33_1; LVNP34_1; LVNP35_1; LVNP35_2; LVNP36_1; LVNP36_2; SGR01_1; SGR01_2; SGR05_1; SGR05_2; SGR06_1; SGR06_2; SGR07_2; SGR12_1; SGR12_2; SGR13_1; SGR14_1; SGR14_2                                                                                                                                                                                                                                                                                                                                                                                                                                                                                                                                                                                                                                                                                                                                       |
| 17 | <i>thornicrofti</i> _LVNP33_2 | 2   | LVNP33_2; LVNP34_2                                                                                                                                                                                                                                                                                                                                                                                                                                                                                                                                                                                                                                                                                                                                                                                                                                                                                                                                                                                                                                                   |
| 18 | <i>thornicrofti</i> _LVNP31_2 | 1   | LVNP31_2                                                                                                                                                                                                                                                                                                                                                                                                                                                                                                                                                                                                                                                                                                                                                                                                                                                                                                                                                                                                                                                             |
| 19 | <i>tippelskirchi</i> _SGR07_1 | 1   | SGR07_1                                                                                                                                                                                                                                                                                                                                                                                                                                                                                                                                                                                                                                                                                                                                                                                                                                                                                                                                                                                                                                                              |
| 20 | <i>tippelskirchi</i> _SGR13_2 | 1   | SGR13_2                                                                                                                                                                                                                                                                                                                                                                                                                                                                                                                                                                                                                                                                                                                                                                                                                                                                                                                                                                                                                                                              |
| 21 | <i>giraffa</i> _V26_2         | 1   | V26_2                                                                                                                                                                                                                                                                                                                                                                                                                                                                                                                                                                                                                                                                                                                                                                                                                                                                                                                                                                                                                                                                |
| 22 | <i>giraffa</i> _SUN4_2        | 1   | SUN4_2                                                                                                                                                                                                                                                                                                                                                                                                                                                                                                                                                                                                                                                                                                                                                                                                                                                                                                                                                                                                                                                               |
| 23 | <i>giraffa</i> _BNP01_1       | 119 | BNP01_1; BNP01_2; BNP02_1; BNP02_2; BNP03_1; BNP03_2; BNP04_1; BNP04_2; BNP05_1; BNP05_2; BNP06_1; BNP09_1; BNP09_2; CKGR01_1; CKGR01_2; CKGR02_1; CKGR02_2; CKGR03_1; CKGR03_2; CKGR05_1; CKGR05_2; CNP01_1; CNP01_2; CNP02_1; CNP02_2; CNP03_1; CNP03_2; ENP04_1; ENP04_2; ENP07_1; ENP07_2; ENP08_1; ENP08_2; ENP09_1; ENP09_2; ENP11_1; ENP11_2; ENP12_1; ENP12_2; ENP14_1; ENP14_2; ENP15_1; ENP15_2; ENP16_1; ENP16_2; ENP17_1; ENP18_1; ENP18_2; ENP19_1; ENP19_2; ENP20_1; ENP20_2; ENP21_1; ENP21_2; KKR01_1; KKR01_2; KKR02_1; KKR02_2; KKR03_1; KKR03_2; KKR04_1; KKR04_2; KKR05_1; KKR05_2; KKR07_1; KKR07_2; KKR08_1; KKR08_2; MGR01_1; MGR02_1; MGR02_2; MGR03_1; MGR03_2; MGR04_1; MGR05_1; MGR05_2; MTNP01_1; MTNP01_2; MTNP02_1; MTNP02_2; MTNP03_1; MTNP03_2; RET1_1; RET6_2; RETrot1_2; ISC04_2; ISC08_1; SNNP_1; SNNP_2; SUN1_1; SUN1_2; SUN2_1; SUN2_2; SUN3_1; SUN3_2; SUN4_1; V23_1; V24_1; V24_2; V25_1; V25_2; V26_1; V26_2; V27_1; V27_2; V28_1; V28_2; V29_1; V30_1; V30_2; V31_1; V31_2; V36_1; V37_1; V37_2; V38_1; V38_2; V39_1; V39_2 |
| 24 | <i>giraffa</i> _BNP06_2       | 6   | BNP06_2; ENP17_2; MGR01_2; MGR04_2; V23_2; V29_2                                                                                                                                                                                                                                                                                                                                                                                                                                                                                                                                                                                                                                                                                                                                                                                                                                                                                                                                                                                                                     |

**Table E.** Overview of the respective alleles comprised by the haplotypes shown in the network of *CTAGE5*.

| n | Representative individual     | $\Sigma$ | Included Alleles per Haplotypes                                                                                                                                                                                                                                                                                                                                                                                                                                                                                                                                                              |
|---|-------------------------------|----------|----------------------------------------------------------------------------------------------------------------------------------------------------------------------------------------------------------------------------------------------------------------------------------------------------------------------------------------------------------------------------------------------------------------------------------------------------------------------------------------------------------------------------------------------------------------------------------------------|
| 1 | <i>camelopardalis</i> _ETH1_1 | 66       | ETH1_1; ETH1_2; ETH2_2; ETH3_2; GNP01_1; GNP01_2; GNP02_1; GNP02_2; GNP03_1; GNP03_2; GNP04_1; GNP05_1; GNP05_2; MF01_2; MF03_2; MF04_2; MF05_2; MF06_2; MF07_2; MF09_2; MF11_2; MF13_2; MF14_2; MF15_2; MF16_1; MF16_2; MF17_1; MF17_2; RET3_1; RET3_2; RETrot2_2; RETrot3_2; RETWil_2; ISC03_2; ISC08_2; LWC01_1; LWC01_2; SNR1_1; SNR1_2; SNR2_1; SNR2_2; WA026_1; WA036_2; WA117_1; WA117_2; WA606_1; WA606_2; WA609_1; WA609_2; WA612_1; WA612_2; WA614_1; WA614_2; WA621_1; WA621_2; WA622_1; WA622_2; WA700_1; WA700_2; WA705_2; WA707_1; WA707_2; WA708_2; WA720_1; ZNP01_1; ZNP01_2 |
| 2 | <i>peralta</i> _WA026_2       | 2        | WA026_2; WA720_2                                                                                                                                                                                                                                                                                                                                                                                                                                                                                                                                                                             |

|    |                               |    |                                                                                                                                                                                                                                                                                                                                                                                                                                                                                                                                                                                                                                                                                                                                                                                                  |
|----|-------------------------------|----|--------------------------------------------------------------------------------------------------------------------------------------------------------------------------------------------------------------------------------------------------------------------------------------------------------------------------------------------------------------------------------------------------------------------------------------------------------------------------------------------------------------------------------------------------------------------------------------------------------------------------------------------------------------------------------------------------------------------------------------------------------------------------------------------------|
| 3  | <i>peralta_WA619_2</i>        | 4  | WA619_2; WA623_2; WA705_1; WA708_1                                                                                                                                                                                                                                                                                                                                                                                                                                                                                                                                                                                                                                                                                                                                                               |
| 4  | <i>camelopardalis_BaNP4_1</i> | 36 | BaNP4_1; BaNP4_2; ETH3_1; MF01_1; MF02_1; MF02_2; MF03_1; MF04_1; MF05_1; MF06_1; MF07_1; MF09_1; MF11_1; MF13_1; MF14_1; MF15_1; MF24_1; MF24_2; RET1_1; RET1_2; RET4_1; RET4_2; RET5_1; RET5_2; RET6_1; RET6_2; RETRot1_1; RETRot1_2; RETRot2_1; RETRot3_1; RETWil_1; ISC03_1; ISC08_1; WA036_1; WA619_1; WA623_1                                                                                                                                                                                                                                                                                                                                                                                                                                                                              |
| 5  | <i>reticulata_RETWil2_2</i>   | 2  | RETWil2_2; ISC04_1                                                                                                                                                                                                                                                                                                                                                                                                                                                                                                                                                                                                                                                                                                                                                                               |
| 6  | <i>reticulata_RETWil2_1</i>   | 1  | RETWil2_1                                                                                                                                                                                                                                                                                                                                                                                                                                                                                                                                                                                                                                                                                                                                                                                        |
| 7  | <i>camelopardalis_ETH2_1</i>  | 1  | ETH2_1                                                                                                                                                                                                                                                                                                                                                                                                                                                                                                                                                                                                                                                                                                                                                                                           |
| 8  | <i>reticulata_ISC04_2</i>     | 1  | ISC04_2                                                                                                                                                                                                                                                                                                                                                                                                                                                                                                                                                                                                                                                                                                                                                                                          |
| 9  | <i>antiquorum_GNP04_2</i>     | 1  | GNP04_2                                                                                                                                                                                                                                                                                                                                                                                                                                                                                                                                                                                                                                                                                                                                                                                          |
| 10 | <i>giraffa_CNP02_1</i>        | 2  | CNP02_1; CNP02_2                                                                                                                                                                                                                                                                                                                                                                                                                                                                                                                                                                                                                                                                                                                                                                                 |
| 11 | <i>thornicrofti_LVNP18_1</i>  | 30 | LVNP18_1; LVNP18_2; LVNP19_1; LVNP19_2; LVNP20_1; LVNP20_2; LVNP21_1; LVNP21_2; LVNP22_1; LVNP22_2; LVNP23a_1; LVNP23a_2; LVNP31_1; LVNP31_2; LVNP32_1; LVNP32_2; LVNP33_1; LVNP33_2; LVNP34_1; LVNP34_2; LVNP35_1; LVNP35_2; LVNP36_1; LVNP36_2; SGR01_2; SGR06_1; SGR06_2; SGR12_2; SGR14_1; SGR14_2                                                                                                                                                                                                                                                                                                                                                                                                                                                                                           |
| 12 | <i>giraffa_BNP01_1</i>        | 90 | BNP01_1; BNP02_1; BNP02_2; BNP03_1; BNP03_2; BNP04_1; BNP05_1; BNP05_2; BNP06_1; BNP06_2; BNP09_1; CKGR01_1; CKGR01_2; CKGR02_1; CNP01_1; CNP01_2; CNP03_1; CNP03_2; ENP04_1; ENP07_1; ENP07_2; ENP08_1; ENP08_2; ENP09_1; ENP09_2; ENP11_1; ENP11_2; ENP12_1; ENP12_2; ENP14_1; ENP14_2; ENP15_1; ENP16_1; ENP16_2; ENP17_1; ENP18_1; ENP19_1; ENP19_2; ENP20_1; ENP20_2; ENP21_1; ENP21_2; KKR01_1; KKR02_1; KKR02_2; KKR03_1; KKR04_1; KKR04_2; KKR05_1; KKR05_2; MGR01_1; MGR01_2; MGR02_1; MGR02_2; MGR03_1; MGR03_2; MGR04_1; MGR04_2; MGR05_1; MGR05_2; MTNP01_1; MTNP02_1; MTNP02_2; MTNP03_1; SNNP_1; SNNP_2; SUN1_1; SUN2_1; SUN3_1; V23_1; V23_2; V24_1; V25_1; V25_2; V26_1; V26_2; V27_1; V27_2; V28_1; V28_2; V30_1; V30_2; V31_1; V31_2; V36_1; V36_2; V37_1; V37_2; V39_1; V39_2 |
| 13 | <i>giraffa_MTNP01_2</i>       | 3  | MTNP01_2; MTNP03_2; V38_1                                                                                                                                                                                                                                                                                                                                                                                                                                                                                                                                                                                                                                                                                                                                                                        |
| 14 | <i>giraffa_BNP04_2</i>        | 5  | BNP04_2; KKR07_1; KKR07_2; V29_2; V38_2                                                                                                                                                                                                                                                                                                                                                                                                                                                                                                                                                                                                                                                                                                                                                          |
| 15 | <i>giraffa_SUN1_2</i>         | 1  | SUN1_2                                                                                                                                                                                                                                                                                                                                                                                                                                                                                                                                                                                                                                                                                                                                                                                           |
| 16 | <i>tippelskirchi_SGR01_1</i>  | 1  | SGR01_1                                                                                                                                                                                                                                                                                                                                                                                                                                                                                                                                                                                                                                                                                                                                                                                          |
| 17 | <i>tippelskirchi_SGR12_1</i>  | 1  | SGR12_1                                                                                                                                                                                                                                                                                                                                                                                                                                                                                                                                                                                                                                                                                                                                                                                          |
| 18 | <i>giraffa_BNP01_2</i>        | 19 | BNP01_2; BNP09_2; CKGR03_1; CKGR03_2; CKGR05_1; CKGR05_2; ENP04_2; ENP17_2; ENP18_2; KKR01_2; KKR03_2; KKR08_1; KKR08_2; SUN2_2; SUN3_2; SUN4_1; SUN4_2; V24_2; V29_1                                                                                                                                                                                                                                                                                                                                                                                                                                                                                                                                                                                                                            |
| 19 | <i>angolensis_ENP15_2</i>     | 1  | ENP15_2                                                                                                                                                                                                                                                                                                                                                                                                                                                                                                                                                                                                                                                                                                                                                                                          |
| 20 | <i>angolensis_CKGR02_2</i>    | 1  | CKGR02_2                                                                                                                                                                                                                                                                                                                                                                                                                                                                                                                                                                                                                                                                                                                                                                                         |

**Table F.** Overview of the respective alleles comprised by the haplotypes shown in the network of *CWF19L1*.

| <b>n</b> | <b>Representative individual</b> | <b>Σ</b> | <b>Included Alleles per Haplotypes</b>                                                                                                                                                                                                                                                                                                                                                                                                                                                                                                                                                                                                                                                                                                                                                                                                                                                                                                                                                                                                                                                                                                                                                              |
|----------|----------------------------------|----------|-----------------------------------------------------------------------------------------------------------------------------------------------------------------------------------------------------------------------------------------------------------------------------------------------------------------------------------------------------------------------------------------------------------------------------------------------------------------------------------------------------------------------------------------------------------------------------------------------------------------------------------------------------------------------------------------------------------------------------------------------------------------------------------------------------------------------------------------------------------------------------------------------------------------------------------------------------------------------------------------------------------------------------------------------------------------------------------------------------------------------------------------------------------------------------------------------------|
| 1        | <i>camelopardalis</i> _BaNP4_1   | 79       | BaNP4_1; ETH1_1; ETH2_1; ETH2_2; ETH3_1; ETH3_2; GNP01_1; GNP03_1; GNP04_1; GNP04_2; GNP05_1; MF02_1; MF03_1; MF04_1; MF06_1; MF09_2; MF15_2; MF17_2; MF24_2; RET1_1; RET1_2; RET3_1; RET3_2; RET4_1; RET4_2; RET5_1; RET5_2; RET6_1; RET6_2; RETRot1_1; RETRot1_2; RETRot2_1; RETRot2_2; RETRot3_1; RETRot3_2; RETWil_1; RETWil2_1; RETWil2_2; ISC03_1; ISC04_1; ISC04_2; ISC08_1; ISC08_2; LWC01_1; LWC01_2; SNR1_1; SNR1_2; SNR2_1; WA026_1; WA026_2; WA036_1; WA036_2; WA117_1; WA117_2; WA606_1; WA606_2; WA609_1; WA609_2; WA612_1; WA612_2; WA614_1; WA614_2; WA619_1; WA619_2; WA621_1; WA621_2; WA622_1; WA622_2; WA623_1; WA623_2; WA700_1; WA700_2; WA705_1; WA705_2; WA707_1; WA707_2; WA720_1; WA720_2; ZNP01_1                                                                                                                                                                                                                                                                                                                                                                                                                                                                        |
| 2        | <i>camelopardalis</i> _BaNP4_2   | 28       | BaNP4_2; ETH1_2; GNP01_2; GNP02_1; GNP02_2; GNP03_2; GNP05_2; MF01_1; MF01_2; MF02_2; MF03_2; MF04_2; MF05_1; MF05_2; MF06_2; MF07_1; MF07_2; MF09_1; MF11_1; MF11_2; MF15_1; MF16_1; MF16_2; MF17_1; MF24_1; RETWil_2; ISC03_2; SNR2_2                                                                                                                                                                                                                                                                                                                                                                                                                                                                                                                                                                                                                                                                                                                                                                                                                                                                                                                                                             |
| 3        | <i>peralta</i> _WA708_1          | 2        | WA708_1; WA708_2                                                                                                                                                                                                                                                                                                                                                                                                                                                                                                                                                                                                                                                                                                                                                                                                                                                                                                                                                                                                                                                                                                                                                                                    |
| 4        | <i>rothschildi</i> _MF13_1       | 3        | MF13_1; MF14_1; MF14_2                                                                                                                                                                                                                                                                                                                                                                                                                                                                                                                                                                                                                                                                                                                                                                                                                                                                                                                                                                                                                                                                                                                                                                              |
| 5        | <i>rothschildi</i> _MF13_2       | 1        | MF13_2                                                                                                                                                                                                                                                                                                                                                                                                                                                                                                                                                                                                                                                                                                                                                                                                                                                                                                                                                                                                                                                                                                                                                                                              |
| 6        | <i>antiquorum</i> _ZNP01_2       | 1        | ZNP01_2                                                                                                                                                                                                                                                                                                                                                                                                                                                                                                                                                                                                                                                                                                                                                                                                                                                                                                                                                                                                                                                                                                                                                                                             |
| 7        | <i>giraffa</i> _BNP02_2          | 27       | BNP02_2; BNP03_1; BNP03_2; BNP06_1; BNP06_2; CKGR01_1; CKGR01_2; CNP02_2; ENP04_2; ENP08_2; ENP15_2; ENP16_2; ENP18_1; ENP18_2; ENP19_1; ENP19_2; ENP20_2; ENP21_2; KKR02_1; KKR02_2; KKR04_2; MGR02_2; SGR07_2; SGR12_2; V28_2; V36_2; V38_2                                                                                                                                                                                                                                                                                                                                                                                                                                                                                                                                                                                                                                                                                                                                                                                                                                                                                                                                                       |
| 8        | <i>giraffa</i> _BNP02_1          | 130      | BNP01_1; BNP01_2; BNP02_1; BNP04_1; BNP04_2; BNP05_1; BNP05_2; BNP09_1; BNP09_2; CKGR02_1; CKGR02_2; CKGR03_1; CKGR03_2; CKGR05_1; CKGR05_2; CNP01_1; CNP01_2; CNP02_1; CNP03_1; CNP03_2; ENP04_1; ENP07_1; ENP07_2; ENP08_1; ENP09_1; ENP09_2; ENP11_1; ENP11_2; ENP12_1; ENP12_2; ENP14_1; ENP14_2; ENP15_1; ENP16_1; ENP17_1; ENP17_2; ENP20_1; ENP21_1; KKR01_1; KKR01_2; KKR03_1; KKR03_2; KKR04_1; KKR05_1; KKR05_2; KKR07_1; KKR07_2; KKR08_1; KKR08_2; LVNP18_1; LVNP18_2; LVNP19_1; LVNP19_2; LVNP20_1; LVNP20_2; LVNP21_1; LVNP21_2; LVNP22_1; LVNP22_2; LVNP23a_1; LVNP23a_2; LVNP31_1; LVNP31_2; LVNP32_1; LVNP32_2; LVNP33_1; LVNP33_2; LVNP34_1; LVNP34_2; LVNP35_1; LVNP35_2; LVNP36_1; LVNP36_2; MGR01_1; MGR01_2; MGR02_1; MGR03_1; MGR03_2; MGR04_1; MGR04_2; MGR05_1; MGR05_2; MTNP01_1; MTNP01_2; MTNP02_1; MTNP02_2; MTNP03_1; MTNP03_2; SGR01_1; SGR01_2; SGR05_1; SGR05_2; SGR06_1; SGR06_2; SGR07_1; SGR12_1; SGR13_1; SGR13_2; SGR14_1; SGR14_2; SNNP_1; SNNP_2; SUN1_1; SUN1_2; SUN2_1; SUN3_1; SUN3_2; SUN4_1; SUN4_2; V23_1; V23_2; V24_1; V24_2; V25_1; V25_2; V26_1; V26_2; V27_1; V28_1; V29_1; V29_2; V30_1; V30_2; V31_1; V31_2; V36_1; V37_1; V37_2; V38_1; V39_1 |
| 9        | <i>giraffa</i> _V27_2            | 2        | V27_2; V39_2                                                                                                                                                                                                                                                                                                                                                                                                                                                                                                                                                                                                                                                                                                                                                                                                                                                                                                                                                                                                                                                                                                                                                                                        |
| 10       | <i>giraffa</i> _SUN2_2           | 1        | SUN2_2                                                                                                                                                                                                                                                                                                                                                                                                                                                                                                                                                                                                                                                                                                                                                                                                                                                                                                                                                                                                                                                                                                                                                                                              |



**Table G.** Overview of the respective alleles comprised by the haplotypes shown in the network of *DDX1*.

| <b>n</b> | <b>Representative individual</b> | <b>Σ</b> | <b>Included Alleles per Haplotypes</b>                                                                                                                                                                                                                                                                                                                                                                                                                                                                                                                                                                                                                                                                                                                                                                                                                                                                                                                                                                                                                                                                                                                                                                                                                                                                                                                                          |
|----------|----------------------------------|----------|---------------------------------------------------------------------------------------------------------------------------------------------------------------------------------------------------------------------------------------------------------------------------------------------------------------------------------------------------------------------------------------------------------------------------------------------------------------------------------------------------------------------------------------------------------------------------------------------------------------------------------------------------------------------------------------------------------------------------------------------------------------------------------------------------------------------------------------------------------------------------------------------------------------------------------------------------------------------------------------------------------------------------------------------------------------------------------------------------------------------------------------------------------------------------------------------------------------------------------------------------------------------------------------------------------------------------------------------------------------------------------|
| 1        | <i>camelopardalis</i> _BaNP4_1   | 1        | BaNP4_1                                                                                                                                                                                                                                                                                                                                                                                                                                                                                                                                                                                                                                                                                                                                                                                                                                                                                                                                                                                                                                                                                                                                                                                                                                                                                                                                                                         |
| 2        | <i>camelopardalis</i> _BaNP4_2   | 100      | BaNP4_2; ETH1_1; ETH1_2; ETH2_1; ETH2_2; ETH3_1; ETH3_2; GNP01_1; GNP01_2; GNP02_1; GNP02_2; GNP03_1; GNP03_2; GNP04_1; GNP04_2; GNP05_1; GNP05_2; MF01_1; MF01_2; MF02_1; MF02_2; MF03_1; MF03_2; MF04_1; MF04_2; MF05_1; MF05_2; MF06_1; MF06_2; MF07_1; MF07_2; MF09_1; MF09_2; MF11_1; MF11_2; MF13_1; MF13_2; MF14_1; MF14_2; MF15_1; MF15_2; MF16_1; MF16_2; MF17_1; MF17_2; MF24_1; MF24_2; RET1_2; RET3_1; RET3_2; RET6_2; RETRot2_1; RETRot2_2; RETWil_1; RETWil_2; RETWil2_1; ISC03_1; ISC03_2; ISC04_1; ISC08_1; ISC08_2; LWC01_1; SNR1_1; SNR1_2; SNR2_1; SNR2_2; WA026_1; WA026_2; WA036_1; WA036_2; WA117_1; WA117_2; WA606_1; WA606_2; WA609_1; WA609_2; WA612_1; WA612_2; WA614_1; WA614_2; WA619_1; WA619_2; WA621_1; WA621_2; WA622_1; WA622_2; WA623_1; WA623_2; WA700_1; WA700_2; WA705_1; WA705_2; WA707_1; WA707_2; WA708_1; WA708_2; WA720_1; WA720_2; ZNP01_1; ZNP01_2                                                                                                                                                                                                                                                                                                                                                                                                                                                                                  |
| 3        | <i>reticulata</i> _RET1_1        | 10       | RET1_1; RET4_1; RET4_2; RET5_1; RET5_2; RET6_1; RETRot1_1; RETRot1_2; RETRot3_1; RETRot3_2                                                                                                                                                                                                                                                                                                                                                                                                                                                                                                                                                                                                                                                                                                                                                                                                                                                                                                                                                                                                                                                                                                                                                                                                                                                                                      |
| 4        | <i>reticulata</i> _LWC01_2       | 1        | LWC01_2                                                                                                                                                                                                                                                                                                                                                                                                                                                                                                                                                                                                                                                                                                                                                                                                                                                                                                                                                                                                                                                                                                                                                                                                                                                                                                                                                                         |
| 5        | <i>giraffa</i> _MGR02_2          | 3        | MGR02_2; V27_2; V39_2                                                                                                                                                                                                                                                                                                                                                                                                                                                                                                                                                                                                                                                                                                                                                                                                                                                                                                                                                                                                                                                                                                                                                                                                                                                                                                                                                           |
| 6        | <i>thornicrofti</i> _LVNP32_2    | 6        | LVNP32_2; LVNP33_1; LVNP33_2; LVNP36_2; SGR01_2; SGR14_2                                                                                                                                                                                                                                                                                                                                                                                                                                                                                                                                                                                                                                                                                                                                                                                                                                                                                                                                                                                                                                                                                                                                                                                                                                                                                                                        |
| 7        | <i>thornicrofti</i> _LVNP36_1    | 3        | LVNP36_1; SGR01_1; SGR14_1                                                                                                                                                                                                                                                                                                                                                                                                                                                                                                                                                                                                                                                                                                                                                                                                                                                                                                                                                                                                                                                                                                                                                                                                                                                                                                                                                      |
| 8        | <i>giraffa</i> _BNP01_1          | 150      | BNP01_1; BNP01_2; BNP02_1; BNP02_2; BNP03_1; BNP03_2; BNP04_1; BNP04_2; BNP05_1; BNP05_2; BNP06_1; BNP06_2; BNP09_1; BNP09_2; CKGR01_1; CKGR01_2; CKGR02_1; CKGR02_2; CKGR03_1; CKGR03_2; CKGR05_1; CKGR05_2; CNP01_1; CNP01_2; CNP02_1; CNP02_2; CNP03_1; CNP03_2; ENP04_1; ENP04_2; ENP07_1; ENP07_2; ENP08_1; ENP08_2; ENP09_1; ENP09_2; ENP11_1; ENP11_2; ENP12_1; ENP12_2; ENP14_1; ENP14_2; ENP15_1; ENP15_2; ENP16_1; ENP16_2; ENP17_1; ENP17_2; ENP18_1; ENP18_2; ENP19_1; ENP19_2; ENP20_1; ENP20_2; ENP21_1; ENP21_2; KKR01_1; KKR01_2; KKR02_1; KKR02_2; KKR03_1; KKR03_2; KKR04_1; KKR04_2; KKR05_1; KKR05_2; KKR07_1; KKR07_2; KKR08_1; KKR08_2; LVNP18_1; LVNP18_2; LVNP19_1; LVNP19_2; LVNP20_1; LVNP20_2; LVNP21_1; LVNP21_2; LVNP22_1; LVNP22_2; LVNP23a_1; LVNP23a_2; LVNP31_1; LVNP31_2; LVNP32_1; LVNP34_1; LVNP34_2; LVNP35_1; LVNP35_2; MGR01_1; MGR01_2; MGR02_1; MGR03_1; MGR03_2; MGR04_1; MGR04_2; MGR05_1; MGR05_2; MTNP01_1; MTNP01_2; MTNP02_1; MTNP02_2; MTNP03_1; MTNP03_2; RETWil2_2; ISC04_2; SGR05_1; SGR05_2; SGR06_1; SGR06_2; SGR07_1; SGR07_2; SGR12_1; SGR12_2; SGR13_1; SGR13_2; SNNP_1; SNNP_2; SUN1_1; SUN1_2; SUN2_1; SUN2_2; SUN3_1; SUN3_2; SUN4_1; SUN4_2; V23_1; V23_2; V24_1; V24_2; V25_1; V25_2; V26_1; V26_2; V27_1; V28_1; V28_2; V29_1; V29_2; V30_1; V30_2; V31_1; V31_2; V36_1; V36_2; V37_1; V37_2; V38_1; V38_2; V39_1 |

**Table H.** Overview of the respective alleles comprised by the haplotypes shown in the network of *DHX36*.

| <b>n</b> | <b>Representative individual</b> | <b>Σ</b> | <b>Included Alleles per Haplotypes</b>                                                                                                                                                                                                                                                                                                                                                                                                                                                                                                                                                                                                                                                                                                                                                                                                                                                                                                                                                                                                                                                   |
|----------|----------------------------------|----------|------------------------------------------------------------------------------------------------------------------------------------------------------------------------------------------------------------------------------------------------------------------------------------------------------------------------------------------------------------------------------------------------------------------------------------------------------------------------------------------------------------------------------------------------------------------------------------------------------------------------------------------------------------------------------------------------------------------------------------------------------------------------------------------------------------------------------------------------------------------------------------------------------------------------------------------------------------------------------------------------------------------------------------------------------------------------------------------|
| 1        | <i>camelopardalis_ETH1_1</i>     | 39       | ETH1_1; ETH1_2; ETH2_2; ETH3_2; GNP02_2; GNP04_2; MF01_1; MF01_2; MF02_1; MF02_2; MF03_2; MF04_1; MF04_2; MF05_1; MF05_2; MF06_1; MF06_2; MF07_1; MF07_2; MF09_1; MF09_2; MF11_1; MF11_2; MF13_2; MF14_1; MF14_2; MF15_1; MF15_2; MF16_1; MF16_2; MF17_1; MF17_2; MF24_2; LWC01_1; SNR2_1; SNR2_2; WA117_1; WA117_2; WA720_2                                                                                                                                                                                                                                                                                                                                                                                                                                                                                                                                                                                                                                                                                                                                                             |
| 2        | <i>camelopardalis_ETH2_1</i>     | 22       | ETH2_1; GNP01_1; GNP01_2; GNP02_1; GNP04_1; GNP05_1; GNP05_2; MF03_1; MF13_1; MF24_1; RET3_1; RET3_2; RET4_1; RETRot1_1; RETWil_2; WA612_2; WA619_1; WA619_2; WA622_2; WA720_1; ZNP01_1; ZNP01_2                                                                                                                                                                                                                                                                                                                                                                                                                                                                                                                                                                                                                                                                                                                                                                                                                                                                                         |
| 3        | <i>camelopardalis_BaNP4_1</i>    | 70       | BaNP4_1; BaNP4_2; ETH3_1; GNP03_1; LVNP18_1; LVNP18_2; LVNP19_1; LVNP19_2; LVNP20_1; LVNP20_2; LVNP21_1; LVNP21_2; LVNP22_1; LVNP22_2; LVNP23a_1; LVNP23a_2; LVNP31_1; LVNP31_2; LVNP32_1; LVNP32_2; LVNP33_1; LVNP33_2; LVNP34_1; LVNP34_2; LVNP35_1; LVNP35_2; LVNP36_1; LVNP36_2; RET1_1; RET1_2; RET5_1; RET6_1; RETRot3_1; RETRot3_2; RETWil_1; RETWil2_1; RETWil2_2; ISC04_1; SGR01_1; SGR01_2; SGR05_1; SGR05_2; SGR06_1; SGR07_1; SGR07_2; SGR12_1; SGR12_2; SGR13_1; SGR13_2; SGR14_1; SGR14_2; SNR1_1; WA026_1; WA026_2; WA036_1; WA606_1; WA606_2; WA609_1; WA612_1; WA614_1; WA622_1; WA623_1; WA623_2; WA700_1; WA700_2; WA705_1; WA705_2; WA707_1; WA708_1; WA708_2                                                                                                                                                                                                                                                                                                                                                                                                        |
| 4        | <i>reticulata_RET4_2</i>         | 7        | RET4_2; RET5_2; RET6_2; RETRot1_2; RETRot2_1; ISC03_1; ISC03_2                                                                                                                                                                                                                                                                                                                                                                                                                                                                                                                                                                                                                                                                                                                                                                                                                                                                                                                                                                                                                           |
| 5        | <i>reticulata_ISC08_1</i>        | 1        | ISC08_1                                                                                                                                                                                                                                                                                                                                                                                                                                                                                                                                                                                                                                                                                                                                                                                                                                                                                                                                                                                                                                                                                  |
| 6        | <i>reticulata_ISC08_2</i>        | 1        | ISC08_2                                                                                                                                                                                                                                                                                                                                                                                                                                                                                                                                                                                                                                                                                                                                                                                                                                                                                                                                                                                                                                                                                  |
| 7        | <i>reticulata_ISC04_2</i>        | 1        | ISC04_2                                                                                                                                                                                                                                                                                                                                                                                                                                                                                                                                                                                                                                                                                                                                                                                                                                                                                                                                                                                                                                                                                  |
| 8        | <i>antiquorum_GNP03_2</i>        | 2        | GNP03_2; SNR1_2                                                                                                                                                                                                                                                                                                                                                                                                                                                                                                                                                                                                                                                                                                                                                                                                                                                                                                                                                                                                                                                                          |
| 9        | <i>reticulata_RETRot2_2</i>      | 2        | RETRot2_2; LWC01_2                                                                                                                                                                                                                                                                                                                                                                                                                                                                                                                                                                                                                                                                                                                                                                                                                                                                                                                                                                                                                                                                       |
| 10       | <i>peralta_WA036_2</i>           | 5        | WA036_2; WA614_2; WA621_1; WA621_2; WA707_2                                                                                                                                                                                                                                                                                                                                                                                                                                                                                                                                                                                                                                                                                                                                                                                                                                                                                                                                                                                                                                              |
| 11       | <i>peralta_WA609_2</i>           | 1        | WA609_2                                                                                                                                                                                                                                                                                                                                                                                                                                                                                                                                                                                                                                                                                                                                                                                                                                                                                                                                                                                                                                                                                  |
| 12       | <i>tippelskirchi_SGR06_2</i>     | 1        | SGR06_2                                                                                                                                                                                                                                                                                                                                                                                                                                                                                                                                                                                                                                                                                                                                                                                                                                                                                                                                                                                                                                                                                  |
| 13       | <i>giraffa_BNP01_1</i>           | 122      | BNP01_1; BNP01_2; BNP02_1; BNP02_2; BNP03_1; BNP03_2; BNP04_1; BNP04_2; BNP05_1; BNP05_2; BNP06_1; BNP06_2; BNP09_1; BNP09_2; CKGR01_1; CKGR01_2; CKGR02_1; CKGR02_2; CKGR03_1; CKGR03_2; CKGR05_1; CKGR05_2; CNP01_1; CNP01_2; CNP02_1; CNP02_2; CNP03_1; CNP03_2; ENP04_1; ENP04_2; ENP07_1; ENP07_2; ENP08_1; ENP08_2; ENP09_1; ENP09_2; ENP11_1; ENP11_2; ENP12_1; ENP12_2; ENP14_1; ENP14_2; ENP15_1; ENP15_2; ENP16_1; ENP16_2; ENP17_1; ENP17_2; ENP18_1; ENP18_2; ENP19_1; ENP19_2; ENP20_1; ENP20_2; ENP21_1; ENP21_2; KKR01_1; KKR01_2; KKR02_1; KKR02_2; KKR03_1; KKR03_2; KKR04_1; KKR04_2; KKR05_1; KKR05_2; KKR07_1; KKR07_2; KKR08_1; KKR08_2; MGR01_1; MGR01_2; MGR02_1; MGR02_2; MGR03_1; MGR03_2; MGR04_1; MGR04_2; MGR05_1; MGR05_2; MTNP01_1; MTNP01_2; MTNP02_1; MTNP02_2; MTNP03_1; MTNP03_2; SNNP_1; SNNP_2; SUN1_1; SUN1_2; SUN2_1; SUN2_2; SUN3_1; SUN3_2; SUN4_1; SUN4_2; V23_1; V23_2; V24_1; V24_2; V25_1; V25_2; V26_1; V26_2; V27_1; V27_2; V28_1; V28_2; V29_1; V29_2; V30_1; V30_2; V31_1; V31_2; V36_1; V36_2; V37_1; V37_2; V38_1; V38_2; V39_1; V39_2 |

**Table I.** Overview of the respective alleles comprised by the haplotypes shown in the network of *IGF2BI*.

| <b>n</b> | <b>Representative individual</b> | <b>Σ</b> | <b>Included Alleles per Haplotypes</b>                                                                                                                                                                                                                                                                                                                                                                                                                                                                                                                                                                                                                                                                                                                                                                                                                                                                                   |
|----------|----------------------------------|----------|--------------------------------------------------------------------------------------------------------------------------------------------------------------------------------------------------------------------------------------------------------------------------------------------------------------------------------------------------------------------------------------------------------------------------------------------------------------------------------------------------------------------------------------------------------------------------------------------------------------------------------------------------------------------------------------------------------------------------------------------------------------------------------------------------------------------------------------------------------------------------------------------------------------------------|
| 1        | <i>camelopardalis_BaNP4_1</i>    | 102      | BaNP4_1; BaNP4_2; ETH1_1; ETH1_2; ETH2_1; ETH2_2; ETH3_1; ETH3_2; GNP01_1; GNP02_1; GNP02_2; GNP04_1; MF01_1; MF01_2; MF02_1; MF03_1; MF03_2; MF04_1; MF04_2; MF05_1; MF05_2; MF06_1; MF06_2; MF07_1; MF07_2; MF09_1; MF09_2; MF11_1; MF11_2; MF13_1; MF13_2; MF16_1; MF16_2; MF17_1; MF17_2; MF24_1; MF24_2; RET1_1; RET1_2; RET3_1; RET3_2; RET4_1; RET4_2; RET5_1; RET5_2; RET6_1; RET6_2; RETRot1_1; RETRot1_2; RETRot2_1; RETRot3_1; RETRot3_2; RETWil_1; RETWil_2; RETWil2_1; RETWil2_2; ISC03_1; ISC03_2; ISC04_1; ISC08_1; ISC08_2; LWC01_1; LWC01_2; SGR01_1; SGR01_2; SGR05_1; SGR05_2; SGR06_1; SGR06_2; SGR07_1; SGR07_2; SGR12_1; SGR12_2; SGR13_1; SGR13_2; SGR14_1; SGR14_2; SNR1_1; SNR1_2; SNR2_1; WA036_1; WA036_2; WA117_1; WA117_2; WA606_1; WA606_2; WA609_1; WA612_1; WA612_2; WA614_1; WA619_1; WA621_1; WA621_2; WA622_1; WA623_1; WA700_1; WA700_2; WA705_1; WA705_2; WA708_1; WA708_2; WA720_1 |
| 2        | <i>antiquorum_GNP03_1</i>        | 5        | GNP03_1; GNP03_2; GNP04_2; ZNP01_1; ZNP01_2                                                                                                                                                                                                                                                                                                                                                                                                                                                                                                                                                                                                                                                                                                                                                                                                                                                                              |
| 3        | <i>rothschildi_MF14_1</i>        | 2        | MF14_1; MF14_2                                                                                                                                                                                                                                                                                                                                                                                                                                                                                                                                                                                                                                                                                                                                                                                                                                                                                                           |
| 4        | <i>peralta_WA609_2</i>           | 6        | WA609_2; WA614_2; WA619_2; WA622_2; WA623_2; WA707_1                                                                                                                                                                                                                                                                                                                                                                                                                                                                                                                                                                                                                                                                                                                                                                                                                                                                     |
| 5        | <i>antiquorum_GNP01_2</i>        | 3        | GNP01_2; GNP05_2; SNR2_2                                                                                                                                                                                                                                                                                                                                                                                                                                                                                                                                                                                                                                                                                                                                                                                                                                                                                                 |
| 6        | <i>rothschildi_MF15_1</i>        | 2        | MF15_1; MF15_2                                                                                                                                                                                                                                                                                                                                                                                                                                                                                                                                                                                                                                                                                                                                                                                                                                                                                                           |
| 7        | <i>rothschildi_MF02_2</i>        | 1        | MF02_2                                                                                                                                                                                                                                                                                                                                                                                                                                                                                                                                                                                                                                                                                                                                                                                                                                                                                                                   |
| 8        | <i>antiquorum_GNP05_1</i>        | 1        | GNP05_1                                                                                                                                                                                                                                                                                                                                                                                                                                                                                                                                                                                                                                                                                                                                                                                                                                                                                                                  |
| 9        | <i>reticulata_RETRot2_2</i>      | 1        | RETRot2_2                                                                                                                                                                                                                                                                                                                                                                                                                                                                                                                                                                                                                                                                                                                                                                                                                                                                                                                |
| 10       | <i>reticulata_ISC04_2</i>        | 1        | ISC04_2                                                                                                                                                                                                                                                                                                                                                                                                                                                                                                                                                                                                                                                                                                                                                                                                                                                                                                                  |
| 11       | <i>peralta_WA026_1</i>           | 1        | WA026_1                                                                                                                                                                                                                                                                                                                                                                                                                                                                                                                                                                                                                                                                                                                                                                                                                                                                                                                  |
| 12       | <i>peralta_WA026_2</i>           | 1        | WA026_2                                                                                                                                                                                                                                                                                                                                                                                                                                                                                                                                                                                                                                                                                                                                                                                                                                                                                                                  |
| 13       | <i>peralta_WA720_2</i>           | 1        | WA720_2                                                                                                                                                                                                                                                                                                                                                                                                                                                                                                                                                                                                                                                                                                                                                                                                                                                                                                                  |
| 14       | <i>peralta_WA707_2</i>           | 1        | WA707_2                                                                                                                                                                                                                                                                                                                                                                                                                                                                                                                                                                                                                                                                                                                                                                                                                                                                                                                  |
| 15       | <i>tippelskirchi_LVNP32_1</i>    | 1        | LVNP32_1                                                                                                                                                                                                                                                                                                                                                                                                                                                                                                                                                                                                                                                                                                                                                                                                                                                                                                                 |
| 16       | <i>tippelskirchi_LVNP18_1</i>    | 1        | LVNP18_1                                                                                                                                                                                                                                                                                                                                                                                                                                                                                                                                                                                                                                                                                                                                                                                                                                                                                                                 |
| 17       | <i>tippelskirchi_LVNP18_2</i>    | 22       | LVNP18_2; LVNP19_1; LVNP19_2; LVNP20_1; LVNP20_2; LVNP21_1; LVNP21_2; LVNP22_1; LVNP22_2; LVNP23a_1; LVNP23a_2; LVNP31_1; LVNP31_2; LVNP32_2; LVNP33_1; LVNP33_2; LVNP34_1; LVNP34_2; LVNP35_1; LVNP35_2; LVNP36_1; LVNP36_2                                                                                                                                                                                                                                                                                                                                                                                                                                                                                                                                                                                                                                                                                             |
| 18       | <i>giraffa_V38_1</i>             | 1        | V38_1                                                                                                                                                                                                                                                                                                                                                                                                                                                                                                                                                                                                                                                                                                                                                                                                                                                                                                                    |
| 19       | <i>giraffa_V38_2</i>             | 1        | V38_2                                                                                                                                                                                                                                                                                                                                                                                                                                                                                                                                                                                                                                                                                                                                                                                                                                                                                                                    |
| 20       | <i>angolensis_ENP09_2</i>        | 4        | ENP09_2; ENP17_2; ENP20_2; ENP21_2                                                                                                                                                                                                                                                                                                                                                                                                                                                                                                                                                                                                                                                                                                                                                                                                                                                                                       |
| 21       | <i>giraffa_MGR02_1</i>           | 4        | MGR02_1; V25_1; V25_2; V29_1                                                                                                                                                                                                                                                                                                                                                                                                                                                                                                                                                                                                                                                                                                                                                                                                                                                                                             |

|    |                         |     |                                                                                                                                                                                                                                                                                                                                                                                                                                                                                                                                                                                                                                                                                                                                                                                                                                                                                                                                                                                                          |
|----|-------------------------|-----|----------------------------------------------------------------------------------------------------------------------------------------------------------------------------------------------------------------------------------------------------------------------------------------------------------------------------------------------------------------------------------------------------------------------------------------------------------------------------------------------------------------------------------------------------------------------------------------------------------------------------------------------------------------------------------------------------------------------------------------------------------------------------------------------------------------------------------------------------------------------------------------------------------------------------------------------------------------------------------------------------------|
| 22 | <i>giraffa</i> _BNP01_1 | 112 | BNP01_1; BNP01_2; BNP02_1; BNP02_2; BNP03_1; BNP03_2; BNP04_1; BNP04_2; BNP05_1; BNP05_2; BNP06_1; BNP06_2; BNP09_1; BNP09_2; CKGR01_1; CKGR01_2; CKGR02_1; CKGR02_2; CKGR03_1; CKGR03_2; CKGR05_1; CKGR05_2; CNP01_1; CNP01_2; CNP02_1; CNP02_2; CNP03_1; CNP03_2; ENP04_1; ENP04_2; ENP07_1; ENP07_2; ENP08_1; ENP08_2; ENP09_1; ENP11_1; ENP11_2; ENP12_1; ENP12_2; ENP14_1; ENP14_2; ENP15_1; ENP15_2; ENP16_1; ENP16_2; ENP17_1; ENP18_1; ENP18_2; ENP19_1; ENP19_2; ENP20_1; ENP21_1; KKR01_1; KKR01_2; KKR02_1; KKR02_2; KKR03_1; KKR03_2; KKR04_1; KKR04_2; KKR05_1; KKR05_2; KKR07_1; KKR07_2; KKR08_1; KKR08_2; MGR01_1; MGR01_2; MGR02_2; MGR03_1; MGR03_2; MGR04_1; MGR04_2; MGR05_1; MGR05_2; MTNP01_1; MTNP01_2; MTNP02_1; MTNP02_2; MTNP03_1; MTNP03_2; SNNP_1; SNNP_2; SUN1_1; SUN1_2; SUN2_1; SUN2_2; SUN3_1; SUN3_2; SUN4_1; SUN4_2; V23_1; V23_2; V24_1; V24_2; V26_1; V26_2; V27_1; V27_2; V28_1; V28_2; V29_2; V30_1; V30_2; V31_1; V31_2; V36_1; V36_2; V37_1; V37_2; V39_1; V39_2 |
|----|-------------------------|-----|----------------------------------------------------------------------------------------------------------------------------------------------------------------------------------------------------------------------------------------------------------------------------------------------------------------------------------------------------------------------------------------------------------------------------------------------------------------------------------------------------------------------------------------------------------------------------------------------------------------------------------------------------------------------------------------------------------------------------------------------------------------------------------------------------------------------------------------------------------------------------------------------------------------------------------------------------------------------------------------------------------|

**Table J.** Overview of the respective alleles comprised by the haplotypes shown in the network of *MACF1*.

| n | Representative individual      | $\Sigma$ | Included Alleles per Haplotypes                                                                                                                                                                                                                                                                                                                                                                                                                                                                                                                                                                                                                                                                                                                                                                                                                                                                                                                                                                                      |
|---|--------------------------------|----------|----------------------------------------------------------------------------------------------------------------------------------------------------------------------------------------------------------------------------------------------------------------------------------------------------------------------------------------------------------------------------------------------------------------------------------------------------------------------------------------------------------------------------------------------------------------------------------------------------------------------------------------------------------------------------------------------------------------------------------------------------------------------------------------------------------------------------------------------------------------------------------------------------------------------------------------------------------------------------------------------------------------------|
| 1 | <i>camelopardalis</i> _BaNP4_1 | 108      | BaNP4_1; BaNP4_2; BNP03_1; BNP06_1; CNP01_1; ETH1_1; ETH2_1; ETH3_1; GNP05_1; LVNP18_1; LVNP18_2; LVNP19_1; LVNP19_2; LVNP20_1; LVNP20_2; LVNP21_1; LVNP21_2; LVNP22_1; LVNP22_2; LVNP23a_1; LVNP23a_2; LVNP31_1; LVNP31_2; LVNP32_1; LVNP32_2; LVNP33_1; LVNP33_2; LVNP34_1; LVNP34_2; LVNP35_1; LVNP35_2; LVNP36_1; LVNP36_2; MF01_1; MF02_1; MF03_1; MF05_1; MF06_1; MF07_1; MF09_1; MF11_1; MF13_1; MF13_2; MF14_1; MF16_1; MF17_1; MF24_1; MF24_2; MGR01_1; MGR01_2; MGR02_1; MGR02_2; MGR03_1; MGR03_2; MGR04_1; MGR04_2; MGR05_1; MGR05_2; RET1_1; RET1_2; RET4_1; RET4_2; RET5_1; RET6_1; RET6_2; RETRot1_1; RETRot2_1; RETRot2_2; RETRot3_1; RETRot3_2; RETWil_1; RETWil2_1; RETWil2_2; ISC04_1; ISC04_2; ISC08_1; LWC01_1; LWC01_2; SGR05_1; SGR05_2; SGR06_1; SGR06_2; SGR07_1; SGR07_2; SGR12_1; SGR12_2; SGR14_1; SGR14_2; SNR1_1; SNR1_2; SNR2_1; SNR2_2; V36_1; WA026_1; WA026_2; WA117_1; WA117_2; WA606_1; WA614_1; WA623_1; WA700_1; WA705_1; WA705_2; WA707_1; WA707_2; WA720_1; WA720_2; ZNP01_1 |
| 2 | <i>giraffa</i> _CNP02_1        | 2        | CNP02_1; V37_1                                                                                                                                                                                                                                                                                                                                                                                                                                                                                                                                                                                                                                                                                                                                                                                                                                                                                                                                                                                                       |
| 3 | <i>camelopardalis</i> _ETH1_2  | 6        | ETH1_2; GNP01_2; WA606_2; WA612_1; WA614_2; WA621_1;                                                                                                                                                                                                                                                                                                                                                                                                                                                                                                                                                                                                                                                                                                                                                                                                                                                                                                                                                                 |
| 4 | <i>peralta</i> _WA036_1        | 8        | WA036_1; WA036_2; WA609_1; WA609_2; WA621_2; WA623_2; WA700_2; WA708_2                                                                                                                                                                                                                                                                                                                                                                                                                                                                                                                                                                                                                                                                                                                                                                                                                                                                                                                                               |
| 5 | <i>angolensis</i> _ENP04_1     | 22       | ENP04_1; ENP08_1; ENP17_1; ENP19_1; ENP20_1; KKR03_1; KKR05_1; MTNP01_1; MTNP01_2; MTNP02_1; MTNP03_1; MTNP03_2; SGR01_1; SGR01_2; SGR13_1; SGR13_2; V25_1; V25_2; V27_1; V30_1; V30_2; V39_1                                                                                                                                                                                                                                                                                                                                                                                                                                                                                                                                                                                                                                                                                                                                                                                                                        |
| 6 | <i>camelopardalis</i> _ETH2_2  | 13       | ETH2_2; ETH3_2; MF01_2; MF02_2; MF04_1; MF04_2; MF06_2; MF07_2; MF11_2; MF14_2; MF17_2; ISC03_1; ISC03_2                                                                                                                                                                                                                                                                                                                                                                                                                                                                                                                                                                                                                                                                                                                                                                                                                                                                                                             |
| 7 | <i>antiquorum</i> _GNP01_1     | 24       | GNP01_1; GNP02_1; GNP02_2; GNP03_1; GNP03_2; GNP04_1; GNP04_2; MF03_2; MF05_2; MF09_2; MF15_1; MF15_2; MF16_2; RET3_1; RET3_2; RET5_2; RETRot1_2; RETWil_2; ISC08_2; WA619_1; WA622_1; WA622_2;                                                                                                                                                                                                                                                                                                                                                                                                                                                                                                                                                                                                                                                                                                                                                                                                                      |

|    |                           |    |                                                                                                                                                                                                                                                                                                                                                                                               |
|----|---------------------------|----|-----------------------------------------------------------------------------------------------------------------------------------------------------------------------------------------------------------------------------------------------------------------------------------------------------------------------------------------------------------------------------------------------|
|    |                           |    | WA708_1; ZNP01_2                                                                                                                                                                                                                                                                                                                                                                              |
| 8  | <i>peralta_WA612_2</i>    | 2  | WA612_2; WA619_2                                                                                                                                                                                                                                                                                                                                                                              |
| 9  | <i>antiquorum_GNP05_2</i> | 1  | GNP05_2                                                                                                                                                                                                                                                                                                                                                                                       |
| 10 | <i>giraffa_V28_1</i>      | 1  | V28_1                                                                                                                                                                                                                                                                                                                                                                                         |
| 12 | <i>giraffa_BNP03_2</i>    | 35 | BNP03_2; BNP06_2; CKGR02_2; CKGR05_1; CKGR05_2; CNP01_2; CNP02_2; ENP04_2; ENP07_1; ENP07_2; ENP08_2; ENP09_1; ENP09_2; ENP11_1; ENP11_2; ENP12_1; ENP12_2; ENP14_1; ENP14_2; ENP15_1; ENP15_2; ENP16_1; ENP16_2; ENP17_2; ENP18_1; ENP18_2; ENP19_2; ENP20_2; ENP21_2; MTNP02_2; V29_1; V29_2; V37_2; V38_1; V38_2                                                                           |
| 13 | <i>giraffa_V39_2</i>      | 1  | V39_2                                                                                                                                                                                                                                                                                                                                                                                         |
| 13 | <i>giraffa_V36_2</i>      | 1  | V36_2                                                                                                                                                                                                                                                                                                                                                                                         |
| 14 | <i>giraffa_V27_2</i>      | 1  | V27_2                                                                                                                                                                                                                                                                                                                                                                                         |
| 15 | <i>giraffa_BNP02_2</i>    | 1  | BNP02_2                                                                                                                                                                                                                                                                                                                                                                                       |
| 16 | <i>giraffa_SNNP_1</i>     | 1  | SNNP_1                                                                                                                                                                                                                                                                                                                                                                                        |
| 17 | <i>giraffa_KKR02_1</i>    | 1  | KKR02_1                                                                                                                                                                                                                                                                                                                                                                                       |
| 18 | <i>giraffa_KKR02_2</i>    | 1  | KKR02_2                                                                                                                                                                                                                                                                                                                                                                                       |
| 19 | <i>giraffa_BNP01_1</i>    | 45 | BNP01_1; BNP01_2; BNP02_1; BNP04_1; BNP04_2; BNP05_1; BNP05_2; BNP09_1; BNP09_2; CKGR01_1; CKGR01_2; CKGR02_1; CKGR03_1; CKGR03_2; CNP03_1; CNP03_2; ENP21_1; KKR01_1; KKR01_2; KKR03_2; KKR04_1; KKR04_2; KKR05_2; KKR07_1; KKR07_2; KKR08_1; KKR08_2; SNNP_2; SUN1_1; SUN1_2; SUN2_1; SUN2_2; SUN3_1; SUN3_2; SUN4_1; SUN4_2; V23_1; V23_2; V24_1; V24_2; V26_1; V26_2; V28_2; V31_1; V31_2 |

**Table K.** Overview of the respective alleles comprised by the haplotypes shown in the network of *NOTCH2*.

| n | Representative individual     | $\Sigma$ | Included Alleles per Haplotypes                                                                                                                                                                                                                                                                                                                                                                                                                                                                                                                                                                                                                                                                                                                                                                                                                                                                                                                                                |
|---|-------------------------------|----------|--------------------------------------------------------------------------------------------------------------------------------------------------------------------------------------------------------------------------------------------------------------------------------------------------------------------------------------------------------------------------------------------------------------------------------------------------------------------------------------------------------------------------------------------------------------------------------------------------------------------------------------------------------------------------------------------------------------------------------------------------------------------------------------------------------------------------------------------------------------------------------------------------------------------------------------------------------------------------------|
| 1 | <i>camelopardalis_BaNP4_1</i> | 105      | BaNP4_1; BaNP4_2; ETH1_1; ETH1_2; ETH2_1; ETH2_2; ETH3_1; ETH3_2; GNP01_1; GNP01_2; GNP02_1; GNP02_2; GNP03_1; GNP03_2; GNP04_1; GNP04_2; GNP05_1; GNP05_2; LVNP18_1; LVNP18_2; LVNP19_1; LVNP19_2; LVNP20_1; LVNP20_2; LVNP21_1; LVNP21_2; LVNP22_1; LVNP22_2; LVNP23a_1; LVNP23a_2; LVNP31_1; LVNP31_2; LVNP32_1; LVNP32_2; LVNP33_1; LVNP33_2; LVNP34_1; LVNP34_2; LVNP35_1; LVNP35_2; LVNP36_1; LVNP36_2; MF01_1; MF01_2; MF02_1; MF02_2; MF03_1; MF03_2; MF04_1; MF05_1; MF05_2; MF09_1; MF13_1; MF13_2; MF15_1; MF16_1; MF16_2; MF17_1; MF24_1; MF24_2; RET3_1; RET4_1; RET5_1; RET5_2; RET6_1; RETRot1_1; RETRot2_1; RETWil_1; ISC03_1; ISC04_1; ISC04_2; ISC08_1; ISC08_2; LWC01_1; SGR05_1; SGR05_2; SGR06_1; SGR06_2; SGR07_1; SGR07_2; SGR12_1; SGR12_2; SGR13_1; SGR13_2; SGR14_1; SGR14_2; SNR1_1; SNR2_1; SNR2_2; WA036_1; WA036_2; WA117_1; WA609_1; WA612_1; WA614_1; WA614_2; WA619_1; WA619_2; WA622_1; WA705_1; WA705_2; WA707_1; WA708_1; WA708_2; WA720_1 |

|    |                               |     |                                                                                                                                                                                                                                                                                                                                                                                                                                                                                                                                                                                                                                                                                                                                                                                                                                                                                                                                                                                                                                                                                                   |
|----|-------------------------------|-----|---------------------------------------------------------------------------------------------------------------------------------------------------------------------------------------------------------------------------------------------------------------------------------------------------------------------------------------------------------------------------------------------------------------------------------------------------------------------------------------------------------------------------------------------------------------------------------------------------------------------------------------------------------------------------------------------------------------------------------------------------------------------------------------------------------------------------------------------------------------------------------------------------------------------------------------------------------------------------------------------------------------------------------------------------------------------------------------------------|
| 2  | <i>rothschildi</i> _MF04_2    | 15  | MF04_2; MF06_1; MF06_2; MF07_1; MF07_2; MF09_2; MF11_1; MF11_2; MF14_1; MF14_2; MF15_2; MF17_2; SNR1_2; ZNP01_1; ZNP01_2                                                                                                                                                                                                                                                                                                                                                                                                                                                                                                                                                                                                                                                                                                                                                                                                                                                                                                                                                                          |
| 3  | <i>peralta</i> _WA026_2       | 4   | WA026_2; WA612_2; WA623_2; WA700_2                                                                                                                                                                                                                                                                                                                                                                                                                                                                                                                                                                                                                                                                                                                                                                                                                                                                                                                                                                                                                                                                |
| 4  | <i>peralta</i> _WA117_2       | 1   | WA117_2                                                                                                                                                                                                                                                                                                                                                                                                                                                                                                                                                                                                                                                                                                                                                                                                                                                                                                                                                                                                                                                                                           |
| 5  | <i>peralta</i> _WA606_1       | 1   | WA606_1                                                                                                                                                                                                                                                                                                                                                                                                                                                                                                                                                                                                                                                                                                                                                                                                                                                                                                                                                                                                                                                                                           |
| 6  | <i>reticulata</i> _RET1_1     | 12  | RET1_1; RETRot3_1; RETWil2_1; ISC03_2; WA026_1; WA606_2; WA609_2; WA621_1; WA621_2; WA622_2; WA707_2; WA720_2                                                                                                                                                                                                                                                                                                                                                                                                                                                                                                                                                                                                                                                                                                                                                                                                                                                                                                                                                                                     |
| 7  | <i>reticulata</i> _RET1_2     | 8   | RET1_2; RET4_2; RET6_2; RETRot1_2; RETRot2_2; RETRot3_2; RETWil_2; RETWil2_2                                                                                                                                                                                                                                                                                                                                                                                                                                                                                                                                                                                                                                                                                                                                                                                                                                                                                                                                                                                                                      |
| 8  | <i>reticulata</i> _RET3_2     | 4   | RET3_2; LWC01_2; WA623_1; WA700_1                                                                                                                                                                                                                                                                                                                                                                                                                                                                                                                                                                                                                                                                                                                                                                                                                                                                                                                                                                                                                                                                 |
| 9  | <i>tippelskirchi</i> _SGR01_1 | 1   | SGR01_1                                                                                                                                                                                                                                                                                                                                                                                                                                                                                                                                                                                                                                                                                                                                                                                                                                                                                                                                                                                                                                                                                           |
| 10 | <i>giraffa</i> _BNP01_1       | 123 | BNP01_1; BNP01_2; BNP02_1; BNP02_2; BNP03_1; BNP03_2; BNP04_1; BNP04_2; BNP05_1; BNP05_2; BNP06_1; BNP06_2; BNP09_1; BNP09_2; CKGR01_1; CKGR01_2; CKGR02_1; CKGR02_2; CKGR03_1; CKGR03_2; CKGR05_1; CKGR05_2; CNP01_1; CNP01_2; CNP02_1; CNP02_2; CNP03_1; CNP03_2; ENP04_1; ENP04_2; ENP07_1; ENP07_2; ENP08_1; ENP08_2; ENP09_1; ENP09_2; ENP11_1; ENP11_2; ENP12_1; ENP12_2; ENP14_1; ENP14_2; ENP15_1; ENP15_2; ENP16_1; ENP16_2; ENP17_1; ENP17_2; ENP18_1; ENP18_2; ENP19_1; ENP19_2; ENP20_1; ENP20_2; ENP21_1; ENP21_2; KKR01_1; KKR01_2; KKR02_1; KKR02_2; KKR03_1; KKR03_2; KKR04_1; KKR04_2; KKR05_1; KKR05_2; KKR07_1; KKR07_2; KKR08_1; KKR08_2; MGR01_1; MGR01_2; MGR02_1; MGR02_2; MGR03_1; MGR03_2; MGR04_1; MGR04_2; MGR05_1; MGR05_2; MTNP01_1; MTNP01_2; MTNP02_1; MTNP02_2; MTNP03_1; MTNP03_2; SGR01_2; SNNP_1; SNNP_2; SUN1_1; SUN1_2; SUN2_1; SUN2_2; SUN3_1; SUN3_2; SUN4_1; SUN4_2; V23_1; V23_2; V24_1; V24_2; V25_1; V25_2; V26_1; V26_2; V27_1; V27_2; V28_1; V28_2; V29_1; V29_2; V30_1; V30_2; V31_1; V31_2; V36_1; V36_2; V37_1; V37_2; V38_1; V38_2; V39_1; V39_2 |

**Table L.** Overview of the respective alleles comprised by the haplotypes shown in the network of *NUP155*.

| n | Representative individual      | $\Sigma$ | Included Alleles per Haplotypes                                                                                                                                                                                                                                                                                                                                                                                                                                                                                                                                                                                                                                                                            |
|---|--------------------------------|----------|------------------------------------------------------------------------------------------------------------------------------------------------------------------------------------------------------------------------------------------------------------------------------------------------------------------------------------------------------------------------------------------------------------------------------------------------------------------------------------------------------------------------------------------------------------------------------------------------------------------------------------------------------------------------------------------------------------|
| 1 | <i>camelopardalis</i> _BaNP4_1 | 2        | BaNP4_1; SNR1_1                                                                                                                                                                                                                                                                                                                                                                                                                                                                                                                                                                                                                                                                                            |
| 2 | <i>camelopardalis</i> _BaNP4_2 | 171      | BaNP4_2; BNP01_1; BNP01_2; BNP02_1; BNP02_2; BNP03_1; BNP03_2; BNP04_1; BNP04_2; BNP05_1; BNP05_2; BNP06_1; BNP06_2; BNP09_1; BNP09_2; CKGR01_1; CKGR01_2; CKGR02_1; CKGR02_2; CKGR03_1; CKGR03_2; CKGR05_1; CKGR05_2; CNP01_1; CNP01_2; CNP02_1; CNP02_2; CNP03_1; CNP03_2; ENP04_1; ENP04_2; ENP07_1; ENP07_2; ENP08_1; ENP08_2; ENP09_1; ENP09_2; ENP11_1; ENP11_2; ENP12_1; ENP12_2; ENP14_1; ENP14_2; ENP15_1; ENP15_2; ENP16_1; ENP16_2; ENP17_1; ENP17_2; ENP18_1; ENP18_2; ENP19_1; ENP19_2; ENP20_1; ENP20_2; ENP21_1; ENP21_2; ETH2_1; GNP02_1; GNP02_2; KKR01_1; KKR01_2; KKR02_1; KKR02_2; KKR03_1; KKR03_2; KKR04_1; KKR04_2; KKR05_1; KKR05_2; KKR07_1; KKR07_2; KKR08_1; KKR08_2; LVNP18_1; |

|    |                              |    |                                                                                                                                                                                                                                                                                                                                                                                                                                                                                                                                                                                                                                                                                                                                                                                                                                                            |
|----|------------------------------|----|------------------------------------------------------------------------------------------------------------------------------------------------------------------------------------------------------------------------------------------------------------------------------------------------------------------------------------------------------------------------------------------------------------------------------------------------------------------------------------------------------------------------------------------------------------------------------------------------------------------------------------------------------------------------------------------------------------------------------------------------------------------------------------------------------------------------------------------------------------|
|    |                              |    | LVNP18_2; LVNP19_1; LVNP19_2; LVNP20_1; LVNP20_2; LVNP21_1; LVNP21_2; LVNP22_1; LVNP22_2; LVNP23a_1; LVNP23a_2; LVNP32_1; LVNP32_2; LVNP33_1; LVNP33_2; LVNP34_1; LVNP34_2; LVNP35_1; LVNP35_2; LVNP36_1; LVNP36_2; MGR01_1; MGR01_2; MGR02_1; MGR02_2; MGR03_1; MGR03_2; MGR04_1; MGR04_2; MGR05_1; MGR05_2; MTNP01_1; MTNP01_2; MTNP02_1; MTNP02_2; MTNP03_1; MTNP03_2; RET1_1; RET1_2; RET5_1; RET6_1; RETWil_1; ISC03_1; ISC03_2; ISC08_1; ISC08_2; LWC01_1; SGR01_1; SGR01_2; SGR05_1; SGR06_1; SGR06_2; SGR07_1; SGR07_2; SGR12_1; SGR12_2; SGR13_1; SGR13_2; SGR14_1; SGR14_2; SNNP_1; SNNP_2; SNR1_2; SUN1_1; SUN1_2; SUN2_1; SUN3_1; SUN3_2; SUN4_1; SUN4_2; V23_1; V23_2; V24_1; V24_2; V25_1; V25_2; V26_1; V26_2; V27_1; V27_2; V28_1; V28_2; V29_1; V29_2; V30_1; V30_2; V31_1; V31_2; V36_1; V36_2; V37_1; V37_2; V38_1; V38_2; V39_1; V39_2 |
| 3  | <i>camelopardalis_ETH1_1</i> | 2  | ETH1_1; ETH3_1                                                                                                                                                                                                                                                                                                                                                                                                                                                                                                                                                                                                                                                                                                                                                                                                                                             |
| 4  | <i>camelopardalis_ETH1_2</i> | 2  | ETH1_2; ETH3_2                                                                                                                                                                                                                                                                                                                                                                                                                                                                                                                                                                                                                                                                                                                                                                                                                                             |
| 5  | <i>camelopardalis_ETH2_2</i> | 1  | ETH2_2                                                                                                                                                                                                                                                                                                                                                                                                                                                                                                                                                                                                                                                                                                                                                                                                                                                     |
| 6  | <i>peralta_WA036_1</i>       | 25 | WA036_1; WA117_2; WA606_1; WA606_2; WA609_1; WA609_2; WA612_1; WA612_2; WA614_1; WA614_2; WA619_1; WA621_1; WA621_2; WA622_1; WA622_2; WA623_1; WA623_2; WA700_1; WA700_2; WA705_1; WA705_2; WA707_2; WA708_1; WA720_1; WA720_2                                                                                                                                                                                                                                                                                                                                                                                                                                                                                                                                                                                                                            |
| 7  | <i>peralta_WA036_2</i>       | 3  | WA036_2; WA619_2; WA708_2                                                                                                                                                                                                                                                                                                                                                                                                                                                                                                                                                                                                                                                                                                                                                                                                                                  |
| 8  | <i>antiquorum_GNP01_1</i>    | 16 | GNP01_1; GNP03_1; GNP05_1; RET3_1; RETRot1_1; RETRot1_2; RETRot2_1; RETRot2_2; RETRot3_2; RETWil_2; ISC04_1; ISC04_2; LWC01_2; SNR2_1; ZNP01_1; ZNP01_2                                                                                                                                                                                                                                                                                                                                                                                                                                                                                                                                                                                                                                                                                                    |
| 9  | <i>antiquorum_GNP01_2</i>    | 13 | GNP01_2; GNP03_2; GNP04_1; GNP04_2; GNP05_2; MF01_1; MF03_1; MF09_1; MF09_2; MF17_1; MF24_1; RETWil2_1; SNR2_2                                                                                                                                                                                                                                                                                                                                                                                                                                                                                                                                                                                                                                                                                                                                             |
| 10 | <i>rothschildi_MF01_2</i>    | 28 | MF01_2; MF02_1; MF02_2; MF03_2; MF04_1; MF04_2; MF05_1; MF05_2; MF06_1; MF06_2; MF07_1; MF07_2; MF11_1; MF11_2; MF13_1; MF13_2; MF14_1; MF14_2; MF15_1; MF15_2; MF17_2; MF24_2; RET3_2; RETWil2_2; WA026_1; WA026_2; WA117_1; WA707_1                                                                                                                                                                                                                                                                                                                                                                                                                                                                                                                                                                                                                      |
| 11 | <i>reticulata_RET4_1</i>     | 1  | RET4_1                                                                                                                                                                                                                                                                                                                                                                                                                                                                                                                                                                                                                                                                                                                                                                                                                                                     |
| 12 | <i>reticulata_RET4_2</i>     | 1  | RET4_2                                                                                                                                                                                                                                                                                                                                                                                                                                                                                                                                                                                                                                                                                                                                                                                                                                                     |
| 13 | <i>reticulata_RET5_2</i>     | 1  | RET5_2                                                                                                                                                                                                                                                                                                                                                                                                                                                                                                                                                                                                                                                                                                                                                                                                                                                     |
| 14 | <i>reticulata_RET6_2</i>     | 2  | RET6_2; RETRot3_1                                                                                                                                                                                                                                                                                                                                                                                                                                                                                                                                                                                                                                                                                                                                                                                                                                          |
| 15 | <i>thornicrofti_LVNP31_1</i> | 2  | LVNP31_1; LVNP31_2                                                                                                                                                                                                                                                                                                                                                                                                                                                                                                                                                                                                                                                                                                                                                                                                                                         |
| 16 | <i>tippelskirchi_SGR05_2</i> | 1  | SGR05_2                                                                                                                                                                                                                                                                                                                                                                                                                                                                                                                                                                                                                                                                                                                                                                                                                                                    |
| 17 | <i>giraffa_SUN_2</i>         | 1  | SUN_2                                                                                                                                                                                                                                                                                                                                                                                                                                                                                                                                                                                                                                                                                                                                                                                                                                                      |

**Table M.** Overview of the respective alleles comprised by the haplotypes shown in the network of *OTOF*.

| <b>n</b> | <b>Representative individual</b> | <b><math>\Sigma</math></b> | <b>Included Alleles per Haplotypes</b>                                                                                                                                                                                                                                                                                                                                                                                                                                                                                                                                                                                                                                                                                                                                                                                                            |
|----------|----------------------------------|----------------------------|---------------------------------------------------------------------------------------------------------------------------------------------------------------------------------------------------------------------------------------------------------------------------------------------------------------------------------------------------------------------------------------------------------------------------------------------------------------------------------------------------------------------------------------------------------------------------------------------------------------------------------------------------------------------------------------------------------------------------------------------------------------------------------------------------------------------------------------------------|
| 1        | <i>camelopardalis_BaNP4_1</i>    | 37                         | BaNP4_1; ETH1_1; ETH1_2; GNP01_1; GNP02_1; GNP02_2; GNP03_1; GNP04_1; GNP04_2; GNP05_1; GNP05_2; MF01_1; MF01_2; MF02_1; MF03_1; MF05_1; MF06_1; MF09_1; MF11_1; MF13_1; MF13_2; MF14_1; MF14_2; MF15_1; MF16_1; MF16_2; MF17_2; MF24_1; MF24_2; RETWil2_1; SNR1_1; SNR1_2; SNR2_1; SNR2_2; WA036_1; WA606_1; WA708_1                                                                                                                                                                                                                                                                                                                                                                                                                                                                                                                             |
| 2        | <i>camelopardalis_BaNP4_2</i>    | 4                          | BaNP4_2; WA026_2; WA705_1; WA720_1                                                                                                                                                                                                                                                                                                                                                                                                                                                                                                                                                                                                                                                                                                                                                                                                                |
| 3        | <i>camelopardalis_ETH2_1</i>     | 26                         | ETH2_1; ETH2_2; ETH3_1; ETH3_2; GNP01_2; GNP03_2; MF02_2; MF03_2; MF04_1; MF04_2; MF06_2; MF07_1; MF07_2; MF09_2; MF11_2; MF15_2; RET1_1; RET1_2; RET3_2; RET4_2; RET6_2; RETRot1_2; RETRot2_2; RETRot3_1; RETRot3_2; ISC04_1; ISC04_2                                                                                                                                                                                                                                                                                                                                                                                                                                                                                                                                                                                                            |
| 4        | <i>antiquorum_ZNP01_1</i>        | 2                          | ZNP01_1; ZNP01_2                                                                                                                                                                                                                                                                                                                                                                                                                                                                                                                                                                                                                                                                                                                                                                                                                                  |
| 5        | <i>peralta_WA026_1</i>           | 10                         | WA026_1; WA036_2; WA117_2; WA612_2; WA621_1; WA621_2; WA623_1; WA623_2; WA707_1; WA707_2                                                                                                                                                                                                                                                                                                                                                                                                                                                                                                                                                                                                                                                                                                                                                          |
| 6        | <i>peralta_WA117_1</i>           | 4                          | WA117_1; WA614_1; WA622_1; WA700_1                                                                                                                                                                                                                                                                                                                                                                                                                                                                                                                                                                                                                                                                                                                                                                                                                |
| 7        | <i>peralta_WA606_2</i>           | 6                          | WA606_2; WA609_1; WA612_1; WA614_2; WA619_2; WA708_2                                                                                                                                                                                                                                                                                                                                                                                                                                                                                                                                                                                                                                                                                                                                                                                              |
| 8        | <i>peralta_WA609_2</i>           | 1                          | WA609_2                                                                                                                                                                                                                                                                                                                                                                                                                                                                                                                                                                                                                                                                                                                                                                                                                                           |
| 9        | <i>peralta_WA622_2</i>           | 1                          | WA622_2                                                                                                                                                                                                                                                                                                                                                                                                                                                                                                                                                                                                                                                                                                                                                                                                                                           |
| 10       | <i>peralta_WA626_1</i>           | 1                          | WA626_1                                                                                                                                                                                                                                                                                                                                                                                                                                                                                                                                                                                                                                                                                                                                                                                                                                           |
| 11       | <i>peralta_WA705_2</i>           | 2                          | WA705_2; WA720_2                                                                                                                                                                                                                                                                                                                                                                                                                                                                                                                                                                                                                                                                                                                                                                                                                                  |
| 12       | <i>reticulata_LWC01_2</i>        | 1                          | LWC01_2                                                                                                                                                                                                                                                                                                                                                                                                                                                                                                                                                                                                                                                                                                                                                                                                                                           |
| 13       | <i>rothschildi_MF05_2</i>        | 1                          | MF05_2                                                                                                                                                                                                                                                                                                                                                                                                                                                                                                                                                                                                                                                                                                                                                                                                                                            |
| 14       | <i>rothschildi_MF17_1</i>        | 1                          | MF17_1                                                                                                                                                                                                                                                                                                                                                                                                                                                                                                                                                                                                                                                                                                                                                                                                                                            |
| 15       | <i>reticulata_RET3_1</i>         | 9                          | RET3_1; RET5_2; RET6_1; RETRot1_1; RETWil2_2; RETWil2_2; ISC03_1; ISC03_2; ISC08_2                                                                                                                                                                                                                                                                                                                                                                                                                                                                                                                                                                                                                                                                                                                                                                |
| 16       | <i>thornicrofti_LVNP31_1</i>     | 8                          | LVNP31_1; LVNP31_2; SGR01_2; SGR07_2; SGR12_1; SGR12_2; SGR13_1; SGR13_2                                                                                                                                                                                                                                                                                                                                                                                                                                                                                                                                                                                                                                                                                                                                                                          |
| 17       | <i>thornicrofti_LVNP35_1</i>     | 2                          | LVNP35_1; LVNP35_2                                                                                                                                                                                                                                                                                                                                                                                                                                                                                                                                                                                                                                                                                                                                                                                                                                |
| 18       | <i>giraffa_BNP01_1</i>           | 95                         | BNP01_1; BNP01_2; BNP02_1; BNP03_1; BNP03_2; BNP04_1; BNP05_1; BNP05_2; BNP06_1; BNP06_2; BNP09_1; BNP09_2; CKGR03_1; CKGR03_2; CKGR05_1; CNP01_1; CNP01_2; CNP02_1; CNP03_1; CNP03_2; ENP04_1; ENP07_1; ENP08_1; ENP09_1; ENP11_1; ENP11_2; ENP12_1; ENP12_2; ENP14_1; ENP14_2; ENP15_1; ENP15_2; ENP16_1; ENP16_2; ENP17_1; ENP17_2; ENP18_1; ENP18_2; ENP19_1; ENP19_2; ENP20_1; ENP21_1; ENP21_2; KKR01_1; KKR01_2; KKR02_1; KKR02_2; KKR03_1; KKR04_1; KKR04_2; KKR05_1; KKR05_2; KKR07_1; KKR08_1; KKR08_2; MGR01_1; MGR01_2; MGR02_1; MGR02_2; MGR03_1; MGR03_2; MGR04_1; MGR05_1; MGR05_2; MTNP02_1; MTNP02_2; SNNP_1; SNNP_2; SUN1_1; SUN1_2; SUN2_1; SUN2_2; SUN3_1; SUN3_2; SUN4_1; SUN4_2; V23_1; V23_2; V24_1; V25_1; V26_1; V27_1; V27_2; V28_1; V28_2; V29_1; V30_1; V31_1; V36_1; V36_2; V37_1; V37_2; V38_1; V38_2; V39_1; V39_2 |
| 19       | <i>giraffa_BNP02_2</i>           | 59                         | BNP02_2; BNP04_2; CKGR01_1; CKGR01_2; CKGR02_1; CKGR02_2; CKGR05_2; CNP02_2; ENP04_2; ENP07_2; ENP08_2; ENP09_2; ENP20_2; KKR07_2; LVNP18_1; LVNP18_2; LVNP19_1; LVNP19_2; LVNP20_1; LVNP20_2; LVNP21_1; LVNP21_2; LVNP22_1; LVNP22_2; LVNP23a_1; LVNP23a_2; LVNP32_1; LVNP32_2; LVNP34_1; LVNP34_2; LVNP36_1; LVNP36_2; MGR04_2; MTNP01_1; MTNP01_2; MTNP03_1; MTNP03_2; RET4_1; RET5_1; RETRot2_1; RETWil_1; ISC08_1; LWC01_1; SGR01_1;                                                                                                                                                                                                                                                                                                                                                                                                         |



SGR05\_1; SGR05\_2; SGR06\_1; SGR06\_2; SGR07\_1; SGR14\_1; SGR14\_2;  
V24\_2; V25\_2; V26\_2; V29\_2; V30\_2; V31\_2; WA619\_1; WA700\_2

**Table N.** Overview of the respective alleles comprised by the haplotypes shown in the network of *PLCE1*.

| <b>n</b> | <b>Representative individual</b>     | <b>Σ</b>   | <b>Included Alleles per Haplotypes</b>                                                                                                                                                                                                                                                                                                                                                                                                                                                                                                                                                                                                                                                                                                                                                                                                                                                                                                                                              |
|----------|--------------------------------------|------------|-------------------------------------------------------------------------------------------------------------------------------------------------------------------------------------------------------------------------------------------------------------------------------------------------------------------------------------------------------------------------------------------------------------------------------------------------------------------------------------------------------------------------------------------------------------------------------------------------------------------------------------------------------------------------------------------------------------------------------------------------------------------------------------------------------------------------------------------------------------------------------------------------------------------------------------------------------------------------------------|
| <b>1</b> | <b><i>camelopardalis_BaNP4_1</i></b> | <b>110</b> | BaNP4_1; BaNP4_2; CKGR01_1; CKGR01_2; ETH1_1; ETH1_2; ETH2_1; ETH2_2; ETH3_1; ETH3_2; GNP01_1; GNP01_2; GNP02_1; GNP02_2; GNP03_1; GNP03_2; GNP04_1; GNP04_2; GNP05_1; GNP05_2; MF01_1; MF01_2; MF02_1; MF03_1; MF03_2; MF04_1; MF05_1; MF05_2; MF07_1; MF11_1; MF11_2; MF13_1; MF13_2; MF14_1; MF14_2; MF15_1; MF16_1; MF16_2; MF17_1; MF24_1; MF24_2; RET1_1; RET1_2; RET3_1; RET3_2; RET4_1; RET4_2; RET5_1; RET5_2; RET6_1; RET6_2; RETRot1_1; RETRot1_2; RETRot2_1; RETRot2_2; RETRot3_1; RETRot3_2; RETWil_1; RETWil_2; RETWil2_1; RETWil2_2; ISC03_1; ISC03_2; ISC04_1; ISC04_2; ISC08_1; ISC08_2; LWC01_1; LWC01_2; SNR1_1; SNR1_2; SNR2_1; SNR2_2; V30_1; WA026_1; WA026_2; WA036_1; WA036_2; WA117_1; WA117_2; WA606_1; WA606_2; WA609_1; WA609_2; WA612_1; WA612_2; WA614_1; WA614_2; WA619_1; WA619_2; WA621_1; WA621_2; WA622_1; WA622_2; WA623_1; WA623_2; WA700_1; WA700_2; WA705_1; WA705_2; WA707_1; WA707_2; WA708_1; WA708_2; WA720_1; WA720_2; ZNP01_1; ZNP01_2 |
| <b>2</b> | <b><i>giraffa_MGR02_1</i></b>        | <b>1</b>   | MGR02_1                                                                                                                                                                                                                                                                                                                                                                                                                                                                                                                                                                                                                                                                                                                                                                                                                                                                                                                                                                             |
| <b>3</b> | <b><i>giraffa_MGR02_2</i></b>        | <b>13</b>  | MGR02_2; SNNP_1; SNNP_2; V24_1; V26_2; V27_1; V27_2; V28_2; V30_2; V31_1; V31_2; V39_1; V39_2                                                                                                                                                                                                                                                                                                                                                                                                                                                                                                                                                                                                                                                                                                                                                                                                                                                                                       |
| <b>4</b> | <b><i>giraffa_MGR05_1</i></b>        | <b>1</b>   | MGR05_1                                                                                                                                                                                                                                                                                                                                                                                                                                                                                                                                                                                                                                                                                                                                                                                                                                                                                                                                                                             |
| <b>5</b> | <b><i>giraffa_V36_1</i></b>          | <b>1</b>   | V36_1                                                                                                                                                                                                                                                                                                                                                                                                                                                                                                                                                                                                                                                                                                                                                                                                                                                                                                                                                                               |
| <b>6</b> | <b><i>giraffa_KKR05_2</i></b>        | <b>1</b>   | KKR05_2                                                                                                                                                                                                                                                                                                                                                                                                                                                                                                                                                                                                                                                                                                                                                                                                                                                                                                                                                                             |
| <b>7</b> | <b><i>giraffa_BNP01_1</i></b>        | <b>13</b>  | BNP01_1; BNP02_1; BNP04_1; BNP09_1; CNP01_1; CNP01_2; ENP15_2; ENP16_1; ENP16_2; ENP18_2; ENP19_2; MGR05_2; V37_2                                                                                                                                                                                                                                                                                                                                                                                                                                                                                                                                                                                                                                                                                                                                                                                                                                                                   |
| <b>8</b> | <b><i>giraffa_BNP01_2</i></b>        | <b>50</b>  | BNP01_2; BNP02_2; BNP03_1; BNP03_2; BNP04_2; BNP05_2; BNP06_1; BNP06_2; BNP09_2; CNP03_1; CNP03_2; ENP04_2; ENP07_2; ENP08_1; ENP08_2; ENP09_2; ENP21_2; KKR01_1; KKR01_2; KKR02_2; KKR03_1; KKR03_2; KKR04_2; KKR07_2; KKR08_1; KKR08_2; MF02_2; MF04_2; MF06_1; MF06_2; MF07_2; MF09_1; MF09_2; MF15_2; MF17_2; MGR01_1; MGR01_2; MGR03_2; MGR04_1; MGR04_2; MTNP01_2; MTNP02_2; MTNP03_2; V23_2; V24_2; V25_1; V25_2; V36_2; V38_1; V38_2                                                                                                                                                                                                                                                                                                                                                                                                                                                                                                                                        |
| <b>9</b> | <b><i>giraffa_BNP05_1</i></b>        | <b>84</b>  | BNP05_1; CKGR02_1; CKGR02_2; CKGR03_1; CKGR03_2; CKGR05_1; CKGR05_2; ENP04_1; ENP07_1; ENP09_1; ENP11_1; ENP11_2; ENP12_1; ENP12_2; ENP14_1; ENP14_2; ENP15_1; ENP17_1; ENP17_2; ENP18_1; ENP19_1; ENP20_1; ENP20_2; ENP21_1; KKR02_1; KKR04_1; KKR05_1; KKR07_1; LVNP18_1; LVNP18_2; LVNP19_1; LVNP19_2; LVNP20_1; LVNP20_2; LVNP21_1; LVNP21_2; LVNP22_1; LVNP22_2; LVNP23a_1; LVNP23a_2; LVNP31_1; LVNP31_2; LVNP32_1; LVNP32_2; LVNP33_1; LVNP33_2; LVNP34_1; LVNP34_2; LVNP35_1; LVNP35_2; LVNP36_1; LVNP36_2; MGR03_1; MTNP01_1; MTNP02_1; MTNP03_1; SGR01_1; SGR01_2; SGR05_1; SGR05_2; SGR06_1; SGR06_2; SGR07_1; SGR07_2; SGR12_1; SGR12_2; SGR13_1; SGR13_2; SGR14_1; SGR14_2; SUN1_1; SUN1_2; SUN2_1; SUN2_2; SUN3_1; SUN3_2; SUN4_1; SUN4_2; V23_1; V26_1; V28_1; V29_1; V29_2; V37_1                                                                                                                                                                                   |

**Table O.** Overview of the respective alleles comprised by the haplotypes shown in the network of *RASSF4*.

| n  | Representative individual     | $\Sigma$ | Included Alleles per Haplotypes                                                                                                                                                                                                                                                                                                                                                               |
|----|-------------------------------|----------|-----------------------------------------------------------------------------------------------------------------------------------------------------------------------------------------------------------------------------------------------------------------------------------------------------------------------------------------------------------------------------------------------|
| 1  | <i>antiquorum</i> _GNP01_1    | 8        | GNP01_1; GNP01_2; GNP03_1; GNP03_2; GNP04_1; GNP04_2; SNR2_1; SNR2_2                                                                                                                                                                                                                                                                                                                          |
| 2  | <i>angolensis</i> _CKGR02_2   | 24       | CKGR02_2; CNP01_2; GNP02_2; GNP05_1; GNP05_2; SNR1_1; SNR1_2; WA026_1; WA026_2; WA036_1; WA036_2; WA606_1; WA606_2; WA609_1; WA609_2; WA623_1; WA623_2; WA700_1; WA700_2; WA707_1; WA708_1; WA708_2; ZNP01_1; ZNP01_2                                                                                                                                                                         |
| 3  | <i>camelopardalis</i> _ETH1_1 | 40       | ETH1_1; ETH1_2; LVNP18_1; LVNP18_2; LVNP19_1; LVNP19_2; LVNP20_1; LVNP20_2; LVNP21_1; LVNP21_2; LVNP22_1; LVNP22_2; LVNP23a_1; LVNP23a_2; LVNP31_1; LVNP31_2; LVNP33_1; LVNP33_2; LVNP34_1; LVNP34_2; LVNP35_1; LVNP35_2; LVNP36_1; LVNP36_2; RET6_2; RETRot1_1; SGR01_1; SGR01_2; SGR05_1; SGR05_2; SGR06_1; SGR06_2; SGR07_1; SGR07_2; SGR12_1; SGR12_2; SGR13_1; SGR13_2; SGR14_1; SGR14_2 |
| 4  | <i>camelopardalis</i> _ETH2_1 | 22       | ETH2_1; ETH2_2; ETH3_1; MF01_1; MF03_1; MF03_2; MF04_1; MF05_1; MF07_1; MF09_1; MF09_2; MF13_1; MF13_2; MF14_1; MF15_1; MF16_1; MF16_2; MF24_1; WA619_1; WA619_2; WA621_1; WA622_1                                                                                                                                                                                                            |
| 5  | <i>camelopardalis</i> _ETH3_2 | 5        | ETH3_2; MF02_1; MF02_2; MF06_1; MF06_2                                                                                                                                                                                                                                                                                                                                                        |
| 6  | <i>rothschildi</i> _MF01_2    | 1        | MF01_2                                                                                                                                                                                                                                                                                                                                                                                        |
| 7  | <i>rothschildi</i> _MF04_2    | 3        | MF04_2; MF05_2; MF07_2                                                                                                                                                                                                                                                                                                                                                                        |
| 8  | <i>rothschildi</i> _MF11_1    | 1        | MF11_1                                                                                                                                                                                                                                                                                                                                                                                        |
| 9  | <i>rothschildi</i> _MF11_2    | 2        | MF11_2; MF17_1                                                                                                                                                                                                                                                                                                                                                                                |
| 10 | <i>rothschildi</i> _MF14_2    | 1        | MF14_2                                                                                                                                                                                                                                                                                                                                                                                        |
| 11 | <i>rothschildi</i> _MF15_2    | 2        | MF15_2; MF24_2                                                                                                                                                                                                                                                                                                                                                                                |
| 12 | <i>rothschildi</i> _MF17_2    | 1        | MF17_2                                                                                                                                                                                                                                                                                                                                                                                        |
| 13 | <i>peralta</i> _WA614_1       | 4        | WA614_1; WA614_2; WA622_2; WA705_1                                                                                                                                                                                                                                                                                                                                                            |
| 14 | <i>peralta</i> _WA621_2       | 1        | WA621_2                                                                                                                                                                                                                                                                                                                                                                                       |
| 15 | <i>peralta</i> _WA705_2       | 1        | WA705_2                                                                                                                                                                                                                                                                                                                                                                                       |
| 16 | <i>peralta</i> _WA707_2       | 1        | WA707_2                                                                                                                                                                                                                                                                                                                                                                                       |
| 17 | <i>peralta</i> _WA720_1       | 2        | WA720_1; WA720_2                                                                                                                                                                                                                                                                                                                                                                              |
| 18 | <i>reticulata</i> _RET1_2     | 1        | RET1_2                                                                                                                                                                                                                                                                                                                                                                                        |
| 19 | <i>reticulata</i> _RET3_2     | 1        | RET3_2                                                                                                                                                                                                                                                                                                                                                                                        |
| 20 | <i>reticulata</i> _RET4_1     | 2        | RET4_1; RETRot2_1                                                                                                                                                                                                                                                                                                                                                                             |
| 21 | <i>reticulata</i> _RET4_2     | 1        | RET4_2                                                                                                                                                                                                                                                                                                                                                                                        |
| 22 | <i>reticulata</i> _RET5_1     | 1        | RET5_1                                                                                                                                                                                                                                                                                                                                                                                        |
| 23 | <i>reticulata</i> _RET5_2     | 1        | RET5_2                                                                                                                                                                                                                                                                                                                                                                                        |
| 24 | <i>reticulata</i> _RET6_1     | 8        | RET6_1; RETRot1_2; RETRot3_1; RETWil2_1; ISC03_1; ISC03_2; ISC04_1; ISC08_1                                                                                                                                                                                                                                                                                                                   |

|    |                              |     |                                                                                                                                                                                                                                                                                                                                                                                                                                                                                                                                                                                                                                                                                                                                                                                                                                                                                                                                                                                                                                                    |
|----|------------------------------|-----|----------------------------------------------------------------------------------------------------------------------------------------------------------------------------------------------------------------------------------------------------------------------------------------------------------------------------------------------------------------------------------------------------------------------------------------------------------------------------------------------------------------------------------------------------------------------------------------------------------------------------------------------------------------------------------------------------------------------------------------------------------------------------------------------------------------------------------------------------------------------------------------------------------------------------------------------------------------------------------------------------------------------------------------------------|
| 25 | <i>reticulata</i> _RETRot2_2 | 3   | RETRot2_2; RETRot3_2; RETWil2_2                                                                                                                                                                                                                                                                                                                                                                                                                                                                                                                                                                                                                                                                                                                                                                                                                                                                                                                                                                                                                    |
| 26 | <i>reticulata</i> _RETWil_1  | 1   | RETWil_1                                                                                                                                                                                                                                                                                                                                                                                                                                                                                                                                                                                                                                                                                                                                                                                                                                                                                                                                                                                                                                           |
| 27 | <i>reticulata</i> _RETWil_2  | 1   | RETWil_2                                                                                                                                                                                                                                                                                                                                                                                                                                                                                                                                                                                                                                                                                                                                                                                                                                                                                                                                                                                                                                           |
| 28 | <i>reticulata</i> _ISC04_2   | 2   | ISC04_2; ISC08_2                                                                                                                                                                                                                                                                                                                                                                                                                                                                                                                                                                                                                                                                                                                                                                                                                                                                                                                                                                                                                                   |
| 29 | <i>reticulata</i> _LWC01_1   | 2   | LWC01_1; LWC01_2                                                                                                                                                                                                                                                                                                                                                                                                                                                                                                                                                                                                                                                                                                                                                                                                                                                                                                                                                                                                                                   |
| 30 | <i>giraffa</i> _MGR01_1      | 3   | MGR01_1; MGR02_1; RET3_1                                                                                                                                                                                                                                                                                                                                                                                                                                                                                                                                                                                                                                                                                                                                                                                                                                                                                                                                                                                                                           |
| 31 | <i>giraffa</i> _MGR01_2      | 2   | MGR01_2; MGR02_2                                                                                                                                                                                                                                                                                                                                                                                                                                                                                                                                                                                                                                                                                                                                                                                                                                                                                                                                                                                                                                   |
| 32 | <i>giraffa</i> _BNP01_1      | 118 | BNP01_1; BNP01_2; BNP02_1; BNP02_2; BNP03_1; BNP03_2; BNP04_1; BNP04_2; BNP05_1; BNP05_2; BNP06_1; BNP06_2; BNP09_1; BNP09_2; CKGR01_1; CKGR01_2; CKGR02_1; CKGR03_1; CKGR03_2; CKGR05_1; CKGR05_2; CNP01_1; CNP02_1; CNP02_2; CNP03_1; CNP03_2; ENP04_1; ENP04_2; ENP07_1; ENP07_2; ENP08_1; ENP08_2; ENP09_1; ENP09_2; ENP11_1; ENP11_2; ENP12_1; ENP12_2; ENP14_1; ENP14_2; ENP15_1; ENP15_2; ENP16_1; ENP16_2; ENP17_1; ENP17_2; ENP18_1; ENP18_2; ENP19_1; ENP19_2; ENP20_1; ENP20_2; ENP21_1; ENP21_2; GNP02_1; KKR01_1; KKR01_2; KKR02_1; KKR02_2; KKR03_1; KKR03_2; KKR04_1; KKR04_2; KKR05_1; KKR05_2; KKR07_1; KKR07_2; KKR08_1; KKR08_2; MGR03_1; MGR03_2; MGR04_1; MGR04_2; MGR05_1; MGR05_2; MTNP01_1; MTNP01_2; MTNP02_1; MTNP02_2; MTNP03_1; MTNP03_2; RET1_1; SNNP_1; SNNP_2; SUN1_1; SUN1_2; SUN2_1; SUN2_2; SUN3_1; SUN3_2; SUN4_1; SUN4_2; V23_1; V23_2; V24_1; V24_2; V25_1; V25_2; V26_1; V26_2; V27_1; V27_2; V28_1; V28_2; V29_1; V29_2; V30_1; V30_2; V31_1; V31_2; V36_1; V36_2; V37_1; V37_2; V38_1; V38_2; V39_1; V39_2 |

**Table P.** Overview of the respective alleles comprised by the haplotypes shown in the network of *RFC5*.

| n | Representative individual      | $\Sigma$ | Included Alleles per Haplotypes                                                                                                                                                                                                                                                                                                                                                                                                                                                                                                                                                                                                                                    |
|---|--------------------------------|----------|--------------------------------------------------------------------------------------------------------------------------------------------------------------------------------------------------------------------------------------------------------------------------------------------------------------------------------------------------------------------------------------------------------------------------------------------------------------------------------------------------------------------------------------------------------------------------------------------------------------------------------------------------------------------|
| 1 | <i>camelopardalis</i> _BaNP4_1 | 76       | BaNP4_1; ETH1_1; ETH1_2; ETH2_1; ETH3_1; ETH3_2; GNP01_1; GNP01_2; GNP03_1; GNP03_2; GNP04_1; GNP04_2; GNP05_1; MF01_1; MF01_2; MF02_1; MF02_2; MF03_1; MF03_2; MF04_1; MF04_2; MF05_1; MF05_2; MF06_1; MF06_2; MF07_1; MF07_2; MF09_1; MF09_2; MF11_1; MF11_2; MF13_1; MF13_2; MF14_1; MF14_2; MF15_1; MF15_2; MF16_1; MF16_2; MF17_1; MF17_2; MF24_1; MF24_2; RET1_1; RET4_1; RET6_1; RETWil2_1; ISC04_1; LWC01_1; LWC01_2; SNR1_1; SNR1_2; SNR2_1; SNR2_2; WA026_1; WA026_2; WA036_1; WA117_1; WA606_1; WA606_2; WA609_1; WA612_1; WA614_1; WA614_2; WA619_1; WA619_2; WA621_1; WA622_1; WA623_1; WA623_2; WA700_1; WA705_1; WA707_1; WA720_1; WA720_2; ZNP01_1 |
| 2 | <i>camelopardalis</i> _BaNP4_2 | 2        | BaNP4_2; ETH2_2                                                                                                                                                                                                                                                                                                                                                                                                                                                                                                                                                                                                                                                    |
| 3 | <i>antiquorum</i> _GNP02_1     | 4        | GNP02_1; GNP02_2; GNP05_2; ZNP01_2                                                                                                                                                                                                                                                                                                                                                                                                                                                                                                                                                                                                                                 |
| 4 | <i>peralta</i> _WA036_2        | 11       | WA036_2; WA117_2; WA609_2; WA612_2; WA621_2; WA622_2; WA700_2; WA705_2; WA707_2; WA708_1; WA708_2                                                                                                                                                                                                                                                                                                                                                                                                                                                                                                                                                                  |
| 5 | <i>reticulata</i> _RET1_2      | 14       | RET1_2; RET3_2; RET4_2; RET5_1; RET5_2; RET6_2; RETRot1_1; RETRot1_2; RETWil_2; RETWil2_2; ISC03_1; ISC03_2; ISC04_2; ISC08_2                                                                                                                                                                                                                                                                                                                                                                                                                                                                                                                                      |

|    |                               |     |                                                                                                                                                                                                                                                                                                                                                                                                                                                                                                                                                                                                                                                                                                                                                                                                                                                                                                               |
|----|-------------------------------|-----|---------------------------------------------------------------------------------------------------------------------------------------------------------------------------------------------------------------------------------------------------------------------------------------------------------------------------------------------------------------------------------------------------------------------------------------------------------------------------------------------------------------------------------------------------------------------------------------------------------------------------------------------------------------------------------------------------------------------------------------------------------------------------------------------------------------------------------------------------------------------------------------------------------------|
| 6  | <i>reticulata</i> _RET3_1     | 3   | RET3_1; RETWil_1; ISC08_1                                                                                                                                                                                                                                                                                                                                                                                                                                                                                                                                                                                                                                                                                                                                                                                                                                                                                     |
| 7  | <i>reticulata</i> _RETRot2_1  | 1   | RETRot2_1                                                                                                                                                                                                                                                                                                                                                                                                                                                                                                                                                                                                                                                                                                                                                                                                                                                                                                     |
| 8  | <i>reticulata</i> _RETRot2_2  | 1   | RETRot2_2                                                                                                                                                                                                                                                                                                                                                                                                                                                                                                                                                                                                                                                                                                                                                                                                                                                                                                     |
| 9  | <i>reticulata</i> _RETRot3_1  | 1   | RETRot3_1                                                                                                                                                                                                                                                                                                                                                                                                                                                                                                                                                                                                                                                                                                                                                                                                                                                                                                     |
| 10 | <i>reticulata</i> _RETRot3_2  | 1   | RETRot3_2                                                                                                                                                                                                                                                                                                                                                                                                                                                                                                                                                                                                                                                                                                                                                                                                                                                                                                     |
| 11 | <i>thornicrofti</i> _LVNP18_1 | 38  | LVNP18_1; LVNP18_2; LVNP19_1; LVNP19_2; LVNP20_1; LVNP20_2; LVNP21_1; LVNP21_2; LVNP22_1; LVNP22_2; LVNP23a_1; LVNP23a_2; LVNP31_1; LVNP31_2; LVNP32_1; LVNP32_2; LVNP33_1; LVNP33_2; LVNP34_1; LVNP34_2; LVNP35_1; LVNP35_2; LVNP36_1; LVNP36_2; SGR01_1; SGR01_2; SGR05_1; SGR05_2; SGR06_1; SGR06_2; SGR07_1; SGR07_2; SGR12_1; SGR12_2; SGR13_1; SGR13_2; SGR14_1; SGR14_2                                                                                                                                                                                                                                                                                                                                                                                                                                                                                                                                |
| 12 | <i>angolensis</i> _ENP04_1    | 1   | ENP04_1                                                                                                                                                                                                                                                                                                                                                                                                                                                                                                                                                                                                                                                                                                                                                                                                                                                                                                       |
| 13 | <i>angolensis</i> _ENP08_1    | 2   | ENP08_1; ENP12_1                                                                                                                                                                                                                                                                                                                                                                                                                                                                                                                                                                                                                                                                                                                                                                                                                                                                                              |
| 14 | <i>angolensis</i> _ENP08_2    | 9   | ENP08_2; ENP11_1; ENP11_2; ENP14_1; ENP15_1; ENP20_1; ENP20_2; ENP21_1; ENP21_2                                                                                                                                                                                                                                                                                                                                                                                                                                                                                                                                                                                                                                                                                                                                                                                                                               |
| 15 | <i>angolensis</i> _ENP12_2    | 2   | ENP12_2; ENP15_2                                                                                                                                                                                                                                                                                                                                                                                                                                                                                                                                                                                                                                                                                                                                                                                                                                                                                              |
| 16 | <i>angolensis</i> _ENP17_1    | 2   | ENP17_1; ENP18_1                                                                                                                                                                                                                                                                                                                                                                                                                                                                                                                                                                                                                                                                                                                                                                                                                                                                                              |
| 17 | <i>angolensis</i> _ENP17_2    | 1   | ENP17_2                                                                                                                                                                                                                                                                                                                                                                                                                                                                                                                                                                                                                                                                                                                                                                                                                                                                                                       |
| 18 | <i>giraffa</i> _KKR05_1       | 2   | KKR05_1; KKR05_2                                                                                                                                                                                                                                                                                                                                                                                                                                                                                                                                                                                                                                                                                                                                                                                                                                                                                              |
| 19 | <i>giraffa</i> _BNP01_1       | 103 | BNP01_1; BNP01_2; BNP02_1; BNP02_2; BNP03_1; BNP03_2; BNP04_1; BNP04_2; BNP05_1; BNP05_2; BNP06_1; BNP06_2; BNP09_1; BNP09_2; CKGR01_1; CKGR01_2; CKGR02_1; CKGR02_2; CKGR03_1; CKGR03_2; CKGR05_1; CKGR05_2; CNP01_1; CNP01_2; CNP02_1; CNP02_2; CNP03_1; CNP03_2; ENP04_2; ENP07_1; ENP07_2; ENP09_1; ENP09_2; ENP14_2; ENP16_1; ENP16_2; ENP18_2; ENP19_1; ENP19_2; KKR01_1; KKR01_2; KKR02_1; KKR02_2; KKR03_1; KKR03_2; KKR04_1; KKR04_2; KKR07_1; KKR07_2; KKR08_1; KKR08_2; MGR01_1; MGR01_2; MGR02_1; MGR02_2; MGR03_1; MGR03_2; MGR04_1; MGR04_2; MGR05_1; MGR05_2; MTNP01_1; MTNP01_2; MTNP02_1; MTNP02_2; MTNP03_1; MTNP03_2; SNNP_1; SNNP_2; SUN1_1; SUN1_2; SUN2_1; SUN2_2; SUN3_1; SUN3_2; SUN4_1; SUN4_2; V23_1; V23_2; V24_1; V24_2; V25_1; V25_2; V26_1; V26_2; V27_1; V27_2; V28_1; V28_2; V29_1; V29_2; V30_1; V30_2; V31_1; V31_2; V36_1; V36_2; V37_1; V37_2; V38_1; V38_2; V39_1; V39_2 |

**Table Q.** Overview of the respective alleles comprised by the haplotypes shown in the network of *SAP130*.

| n | Representative individual | $\Sigma$ | Included Alleles per Haplotypes |
|---|---------------------------|----------|---------------------------------|
| 1 | <i>antiquorum</i> _SNR2_1 | 2        | SNR2_1; SNR2_2                  |
| 2 | <i>peralta</i> _WA036_2   | 3        | WA036_2; WA612_2; WA622_2       |

|    |                               |     |                                                                                                                                                                                                                                                                                                                                                                                                                                                                                                                                                                                                                                                                                                                                                                                                                                                                                                                                                                                                                                                                                                                                                                |
|----|-------------------------------|-----|----------------------------------------------------------------------------------------------------------------------------------------------------------------------------------------------------------------------------------------------------------------------------------------------------------------------------------------------------------------------------------------------------------------------------------------------------------------------------------------------------------------------------------------------------------------------------------------------------------------------------------------------------------------------------------------------------------------------------------------------------------------------------------------------------------------------------------------------------------------------------------------------------------------------------------------------------------------------------------------------------------------------------------------------------------------------------------------------------------------------------------------------------------------|
| 3  | <i>camelopardalis_BaNP4_1</i> | 86  | BaNP4_1; BaNP4_2; ETH1_1; ETH1_2; ETH2_1; ETH2_2; ETH3_1; ETH3_2; GNP01_1; GNP01_2; GNP02_1; GNP02_2; GNP03_1; GNP03_2; GNP04_1; GNP04_2; GNP05_1; GNP05_2; MF01_1; MF01_2; MF02_1; MF02_2; MF03_1; MF03_2; MF04_1; MF04_2; MF05_1; MF05_2; MF06_1; MF06_2; MF07_1; MF07_2; MF09_1; MF09_2; MF11_1; MF11_2; MF13_1; MF13_2; MF14_1; MF14_2; MF15_1; MF15_2; MF16_1; MF16_2; MF17_1; MF17_2; MF24_1; MF24_2; RET1_1; RET3_1; RET3_2; RET4_1; RET4_2; RETWil2_1; ISC03_1; LWC01_1; SNR1_1; SNR1_2; WA026_1; WA026_2; WA036_1; WA117_1; WA117_2; WA606_1; WA609_1; WA609_2; WA612_1; WA614_1; WA614_2; WA619_1; WA619_2; WA622_1; WA623_1; WA623_2; WA700_1; WA700_2; WA705_1; WA705_2; WA707_1; WA707_2; WA708_1; WA708_2; WA720_1; WA720_2; ZNP01_1; ZNP01_2                                                                                                                                                                                                                                                                                                                                                                                                    |
| 4  | <i>peralta_WA606_2</i>        | 3   | WA606_2; WA621_1; WA621_2                                                                                                                                                                                                                                                                                                                                                                                                                                                                                                                                                                                                                                                                                                                                                                                                                                                                                                                                                                                                                                                                                                                                      |
| 5  | <i>reticulata_RET1_2</i>      | 12  | RET1_2; RET6_2; RETRot1_2; RETRot2_1; RETRot2_2; RETRot3_2; RETWil_1; RETWil_2; ISC04_1; ISC04_2; ISC08_1; ISC08_2                                                                                                                                                                                                                                                                                                                                                                                                                                                                                                                                                                                                                                                                                                                                                                                                                                                                                                                                                                                                                                             |
| 6  | <i>reticulata_RET5_1</i>      | 1   | RET5_1                                                                                                                                                                                                                                                                                                                                                                                                                                                                                                                                                                                                                                                                                                                                                                                                                                                                                                                                                                                                                                                                                                                                                         |
| 7  | <i>reticulata_RET5_2</i>      | 5   | RET5_2; RET6_1; RETRot1_1; RETRot3_1; LWC01_2                                                                                                                                                                                                                                                                                                                                                                                                                                                                                                                                                                                                                                                                                                                                                                                                                                                                                                                                                                                                                                                                                                                  |
| 8  | <i>reticulata_RETWil2_2</i>   | 1   | RETWil2_2                                                                                                                                                                                                                                                                                                                                                                                                                                                                                                                                                                                                                                                                                                                                                                                                                                                                                                                                                                                                                                                                                                                                                      |
| 9  | <i>reticulata_ISC03_2</i>     | 1   | ISC03_2                                                                                                                                                                                                                                                                                                                                                                                                                                                                                                                                                                                                                                                                                                                                                                                                                                                                                                                                                                                                                                                                                                                                                        |
| 10 | <i>thornicrofti_LVNP18_1</i>  | 27  | LVNP18_1; LVNP18_2; LVNP19_1; LVNP19_2; LVNP20_1; LVNP20_2; LVNP21_1; LVNP21_2; LVNP22_1; LVNP22_2; LVNP23a_1; LVNP23a_2; LVNP31_1; LVNP31_2; LVNP32_1; LVNP32_2; LVNP33_1; LVNP33_2; LVNP34_1; LVNP34_2; LVNP35_1; LVNP35_2; LVNP36_1; LVNP36_2; SGR05_1; SGR06_1; SGR14_1                                                                                                                                                                                                                                                                                                                                                                                                                                                                                                                                                                                                                                                                                                                                                                                                                                                                                    |
| 11 | <i>angolensis_CKGR03_1</i>    | 2   | CKGR03_1; CKGR03_2                                                                                                                                                                                                                                                                                                                                                                                                                                                                                                                                                                                                                                                                                                                                                                                                                                                                                                                                                                                                                                                                                                                                             |
| 12 | <i>angolensis_ENP04_2</i>     | 1   | ENP04_2                                                                                                                                                                                                                                                                                                                                                                                                                                                                                                                                                                                                                                                                                                                                                                                                                                                                                                                                                                                                                                                                                                                                                        |
| 13 | <i>giraffa_BNP01_1</i>        | 130 | BNP01_1; BNP01_2; BNP02_1; BNP02_2; BNP03_1; BNP03_2; BNP04_1; BNP04_2; BNP05_1; BNP05_2; BNP06_1; BNP06_2; BNP09_1; BNP09_2; CKGR01_1; CKGR01_2; CKGR02_1; CKGR02_2; CKGR05_1; CKGR05_2; CNP01_1; CNP01_2; CNP02_1; CNP02_2; CNP03_1; CNP03_2; ENP04_1; ENP07_1; ENP07_2; ENP08_1; ENP08_2; ENP09_1; ENP09_2; ENP11_1; ENP11_2; ENP12_1; ENP12_2; ENP14_1; ENP14_2; ENP15_1; ENP15_2; ENP16_1; ENP16_2; ENP17_1; ENP17_2; ENP18_1; ENP18_2; ENP19_1; ENP19_2; ENP20_1; ENP20_2; ENP21_1; ENP21_2; KKR01_1; KKR01_2; KKR02_1; KKR02_2; KKR03_1; KKR03_2; KKR04_1; KKR04_2; KKR05_1; KKR05_2; KKR07_1; KKR07_2; KKR08_1; KKR08_2; MGR01_1; MGR01_2; MGR02_1; MGR02_2; MGR03_1; MGR03_2; MGR04_1; MGR04_2; MGR05_1; MGR05_2; MTNP01_1; MTNP01_2; MTNP02_1; MTNP02_2; MTNP03_1; MTNP03_2; SGR01_1; SGR01_2; SGR05_2; SGR06_2; SGR07_1; SGR07_2; SGR12_1; SGR12_2; SGR13_1; SGR13_2; SGR14_2; SNNP_1; SNNP_2; SUN1_1; SUN1_2; SUN2_1; SUN2_2; SUN3_1; SUN3_2; SUN4_1; SUN4_2; V23_1; V23_2; V24_1; V24_2; V25_1; V25_2; V26_1; V26_2; V27_1; V27_2; V28_1; V28_2; V29_1; V29_2; V30_1; V30_2; V31_1; V31_2; V36_1; V36_2; V37_1; V37_2; V38_1; V38_2; V39_1; V39_2 |

**Table R.** Overview of the respective alleles comprised by the haplotypes shown in the network of *SOS1*.

| <b>n</b> | <b>Representative individual</b>     | <b>Σ</b>  | <b>Included Alleles per Haplotypes</b>                                                                                                                                                                                                                                                                                                                                                                                                                                                                                                                                                                                                                                                                                                                                                                                                                        |
|----------|--------------------------------------|-----------|---------------------------------------------------------------------------------------------------------------------------------------------------------------------------------------------------------------------------------------------------------------------------------------------------------------------------------------------------------------------------------------------------------------------------------------------------------------------------------------------------------------------------------------------------------------------------------------------------------------------------------------------------------------------------------------------------------------------------------------------------------------------------------------------------------------------------------------------------------------|
| <b>1</b> | <b><i>camelopardalis</i>_BaNP4_1</b> | <b>96</b> | BaNP4_1; BaNP4_2; ETH1_1; ETH1_2; ETH2_1; ETH2_2; ETH3_1; ETH3_2; GNP01_1; GNP01_2; GNP02_1; GNP02_2; GNP03_1; GNP03_2; GNP04_1; GNP04_2; GNP05_1; GNP05_2; MF01_1; MF01_2; MF02_1; MF02_2; MF03_1; MF03_2; MF04_1; MF04_2; MF05_1; MF05_2; MF06_1; MF06_2; MF07_1; MF07_2; MF09_1; MF09_2; MF11_1; MF11_2; MF13_1; MF13_2; MF14_1; MF14_2; MF15_1; MF15_2; MF16_1; MF16_2; MF17_1; MF17_2; MF24_1; MF24_2; RET1_1; RET1_2; RET3_1; RET3_2; RET4_1; RET4_2; RET5_1; RET6_1; RETRot1_1; RETRot2_1; RETRot2_2; RETRot3_1; RETRot3_2; RETWil_1; RETWil2_1; RETWil2_2; ISC04_1; ISC04_2; ISC08_1; ISC08_2; LWC01_1; LWC01_2; SNR1_1; SNR1_2; SNR2_1; SNR2_2; WA026_1; WA026_2; WA036_1; WA036_2; WA621_1; WA621_2; WA622_1; WA622_2; WA623_1; WA623_2; WA700_1; WA700_2; WA705_1; WA705_2; WA707_1; WA707_2; WA708_1; WA708_2; WA720_1; WA720_2; ZNP01_1; ZNP01_2 |
| <b>2</b> | <b><i>reticulata</i>_RET5_2</b>      | <b>4</b>  | RET5_2; RET6_2; RETRot1_2; RETWil_2                                                                                                                                                                                                                                                                                                                                                                                                                                                                                                                                                                                                                                                                                                                                                                                                                           |
| <b>3</b> | <b><i>reticulata</i>_ISC03_1</b>     | <b>2</b>  | ISC03_1; ISC03_2                                                                                                                                                                                                                                                                                                                                                                                                                                                                                                                                                                                                                                                                                                                                                                                                                                              |
| <b>4</b> | <b><i>thornicrofti</i>_LVNP32_1</b>  | <b>2</b>  | LVNP32_1; LVNP32_2                                                                                                                                                                                                                                                                                                                                                                                                                                                                                                                                                                                                                                                                                                                                                                                                                                            |
| <b>5</b> | <b><i>giraffa</i>_KKR03_2</b>        | <b>38</b> | KKR03_2; LVNP18_1; LVNP18_2; LVNP19_1; LVNP19_2; LVNP20_1; LVNP20_2; LVNP21_1; LVNP21_2; LVNP22_1; LVNP22_2; LVNP23a_1; LVNP23a_2; LVNP31_1; LVNP31_2; LVNP33_1; LVNP33_2; LVNP34_1; LVNP34_2; LVNP35_1; LVNP35_2; LVNP36_1; LVNP36_2; MGR03_1; SGR01_1; SGR01_2; SGR05_1; SGR05_2; SGR06_1; SGR06_2; SGR07_1; SGR07_2; SGR12_1; SGR12_2; SGR13_1; SGR13_2; SGR14_1; SGR14_2                                                                                                                                                                                                                                                                                                                                                                                                                                                                                  |
| <b>6</b> | <b><i>giraffa</i>_MGR04_2</b>        | <b>1</b>  | MGR04_2                                                                                                                                                                                                                                                                                                                                                                                                                                                                                                                                                                                                                                                                                                                                                                                                                                                       |
| <b>7</b> | <b><i>giraffa</i>_BNP01_1</b>        | <b>28</b> | BNP01_1; BNP01_2; BNP03_1; BNP04_1; BNP04_2; BNP05_1; BNP06_1; BNP09_1; BNP09_2; CKGR05_1; CKGR05_2; KKR01_1; KKR01_2; KKR03_1; MGR01_1; MGR01_2; MGR02_1; MGR04_1; MTNP01_1; MTNP01_2; MTNP02_1; MTNP03_1; MTNP03_2; V29_1; V31_1; V36_1; V37_1; V38_1                                                                                                                                                                                                                                                                                                                                                                                                                                                                                                                                                                                                       |
| <b>8</b> | <b><i>giraffa</i>_BNP02_1</b>        | <b>91</b> | BNP02_1; BNP02_2; BNP03_2; BNP05_2; BNP06_2; CKGR01_1; CKGR01_2; CKGR02_1; CKGR02_2; CKGR03_1; CKGR03_2; CNP01_1; CNP01_2; CNP02_1; CNP02_2; CNP03_1; CNP03_2; ENP04_1; ENP04_2; ENP07_1; ENP07_2; ENP08_1; ENP08_2; ENP09_1; ENP09_2; ENP11_1; ENP11_2; ENP12_1; ENP12_2; ENP14_1; ENP14_2; ENP15_1; ENP15_2; ENP16_1; ENP16_2; ENP17_1; ENP17_2; ENP18_1; ENP18_2; ENP19_1; ENP19_2; ENP20_1; ENP20_2; ENP21_1; ENP21_2; KKR02_1; KKR02_2; KKR04_1; KKR04_2; KKR05_1; KKR05_2; KKR07_1; KKR07_2; KKR08_1; KKR08_2; MGR02_2; MGR03_2; MGR05_1; MGR05_2; MTNP02_2; SNNP_1; SNNP_2; SUN1_1; SUN1_2; SUN2_1; SUN2_2; SUN3_1; SUN3_2; SUN4_1; SUN4_2; V23_1; V23_2; V24_1; V24_2; V25_1; V25_2; V26_1; V26_2; V27_1; V27_2; V28_1; V28_2; V29_2; V30_1; V30_2; V31_2; V36_2; V37_2; V38_2; V39_1; V39_2                                                          |

**Table S.** Overview of the respective alleles comprised by the haplotypes shown in the network of *UBN2*.

| <b>n</b> | <b>Representative individual</b> | <b>Σ</b>   | <b>Included Alleles per Haplotypes</b>                                                                                                                                                                                                                                                                                                                                                                                                                                                                                                                                                                                                                                                                                                                                                                                                                                                                                                                                                                                                                                                                                                                                                         |
|----------|----------------------------------|------------|------------------------------------------------------------------------------------------------------------------------------------------------------------------------------------------------------------------------------------------------------------------------------------------------------------------------------------------------------------------------------------------------------------------------------------------------------------------------------------------------------------------------------------------------------------------------------------------------------------------------------------------------------------------------------------------------------------------------------------------------------------------------------------------------------------------------------------------------------------------------------------------------------------------------------------------------------------------------------------------------------------------------------------------------------------------------------------------------------------------------------------------------------------------------------------------------|
| <b>1</b> | <i>camelopardalis_BaNP4_1</i>    | <b>42</b>  | BaNP4_1; BaNP4_2; ETH1_2; ETH2_1; ETH3_1; GNP01_1; GNP01_2; GNP02_2; GNP04_1; GNP04_2; GNP05_2; MF01_1; MF03_2; MF05_1; MF07_1; MF11_1; MF11_2; MF15_1; MF16_1; MF16_2; MTNP03_1; MTNP03_2; RET1_1; RET1_2; RET3_2; RET5_1; RET5_2; RET6_1; RET6_2; RETRot3_1; SNNP_2; SNR1_1; SNR1_2; SNR2_1; SNR2_2; WA036_1; WA036_2; WA612_2; WA614_2; WA708_1; ZNP01_1; ZNP01_2                                                                                                                                                                                                                                                                                                                                                                                                                                                                                                                                                                                                                                                                                                                                                                                                                           |
| <b>2</b> | <i>reticulata_RET4_1</i>         | <b>14</b>  | RET4_1; RET4_2; RETRot1_1; RETRot1_2; RETRot2_1; RETRot2_2; RETWil2_1; ISC03_1; ISC03_2; ISC04_1; ISC04_2; ISC08_1; LWC01_1; LWC01_2                                                                                                                                                                                                                                                                                                                                                                                                                                                                                                                                                                                                                                                                                                                                                                                                                                                                                                                                                                                                                                                           |
| <b>3</b> | <i>reticulata_RETWil2_2</i>      | <b>1</b>   | RETWil2_2                                                                                                                                                                                                                                                                                                                                                                                                                                                                                                                                                                                                                                                                                                                                                                                                                                                                                                                                                                                                                                                                                                                                                                                      |
| <b>4</b> | <i>reticulata_ISC08_2</i>        | <b>1</b>   | ISC08_2                                                                                                                                                                                                                                                                                                                                                                                                                                                                                                                                                                                                                                                                                                                                                                                                                                                                                                                                                                                                                                                                                                                                                                                        |
| <b>5</b> | <i>thornicrofti_LVNP18_1</i>     | <b>38</b>  | LVNP18_1; LVNP18_2; LVNP19_1; LVNP19_2; LVNP20_1; LVNP20_2; LVNP21_1; LVNP21_2; LVNP22_1; LVNP22_2; LVNP23a_1; LVNP23a_2; LVNP31_1; LVNP31_2; LVNP32_1; LVNP32_2; LVNP33_1; LVNP33_2; LVNP34_1; LVNP34_2; LVNP35_1; LVNP35_2; LVNP36_1; LVNP36_2; SGR01_1; SGR01_2; SGR05_1; SGR05_2; SGR06_1; SGR06_2; SGR07_1; SGR07_2; SGR12_1; SGR12_2; SGR13_1; SGR13_2; SGR14_1; SGR14_2                                                                                                                                                                                                                                                                                                                                                                                                                                                                                                                                                                                                                                                                                                                                                                                                                 |
| <b>6</b> | <i>giraffa_V25_2</i>             | <b>1</b>   | V25_2                                                                                                                                                                                                                                                                                                                                                                                                                                                                                                                                                                                                                                                                                                                                                                                                                                                                                                                                                                                                                                                                                                                                                                                          |
| <b>7</b> | <i>giraffa_BNP01_1</i>           | <b>131</b> | BNP01_1; BNP01_2; BNP03_1; BNP04_1; BNP04_2; BNP06_1; BNP09_1; BNP09_2; CKGR01_1; CKGR01_2; CKGR02_1; CKGR02_2; CKGR03_1; CKGR05_1; CKGR05_2; CNP03_1; CNP03_2; ENP04_1; ENP07_1; ENP07_2; ENP08_1; ENP09_1; ENP09_2; ENP11_1; ENP12_1; ENP12_2; ENP14_1; ENP15_1; ENP15_2; ENP16_1; ENP16_2; ENP17_1; ENP17_2; ENP18_1; ENP18_2; ENP19_1; ENP19_2; ENP20_1; ENP21_1; ENP21_2; ETH1_1; ETH2_2; ETH3_2; GNP02_1; GNP03_1; GNP03_2; GNP05_1; KKR01_1; KKR01_2; KKR02_1; KKR02_2; KKR03_1; KKR03_2; KKR04_1; KKR04_2; KKR05_1; KKR05_2; KKR07_1; KKR07_2; KKR08_1; KKR08_2; MF01_2; MF02_1; MF02_2; MF03_1; MF04_1; MF04_2; MF05_2; MF06_1; MF06_2; MF07_2; MF09_1; MF09_2; MF13_1; MF13_2; MF14_1; MF14_2; MF15_2; MF17_1; MF17_2; MF24_1; MF24_2; MGR01_1; MGR01_2; MGR03_1; MTNP01_1; MTNP01_2; MTNP02_1; MTNP02_2; RET3_1; RETRot3_2; RETWil_1; RETWil_2; SNNP_1; SUN1_1; SUN3_1; SUN3_2; SUN4_1; V24_1; V25_1; V28_1; V28_2; V36_1; V37_1; WA026_1; WA026_2; WA117_1; WA117_2; WA606_1; WA606_2; WA609_1; WA609_2; WA612_1; WA614_1; WA619_1; WA619_2; WA621_1; WA621_2; WA622_1; WA622_2; WA623_1; WA623_2; WA700_1; WA700_2; WA705_1; WA705_2; WA707_1; WA707_2; WA708_2; WA720_1; WA720_2 |
| <b>8</b> | <i>giraffa_BNP02_1</i>           | <b>1</b>   | BNP02_1                                                                                                                                                                                                                                                                                                                                                                                                                                                                                                                                                                                                                                                                                                                                                                                                                                                                                                                                                                                                                                                                                                                                                                                        |
| <b>9</b> | <i>giraffa_BNP02_2</i>           | <b>45</b>  | BNP02_2; BNP03_2; BNP05_1; BNP05_2; BNP06_2; CKGR03_2; CNP01_1; CNP01_2; CNP02_1; CNP02_2; ENP04_2; ENP08_2; ENP11_2; ENP14_2; ENP20_2; MGR02_1; MGR02_2; MGR03_2; MGR04_1; MGR04_2; MGR05_1; MGR05_2; SUN1_2; SUN2_1; SUN2_2; SUN4_2; V23_1; V23_2; V24_2; V26_1; V26_2; V27_1; V27_2; V29_1; V29_2; V30_1; V30_2; V31_1; V31_2; V36_2; V37_2; V38_1; V38_2; V39_1; V39_2                                                                                                                                                                                                                                                                                                                                                                                                                                                                                                                                                                                                                                                                                                                                                                                                                     |

**Table T.** Overview of the respective alleles comprised by the haplotypes shown in the network of *USP33*.

| <b>n</b> | <b>Representative individual</b> | <b><math>\Sigma</math></b> | <b>Included Alleles per Haplotypes</b>                                                                                                                                                                                                                                                                                                                                                                                                                                                                                                                                                                                                                                                                                                                                                                                                                                                                     |
|----------|----------------------------------|----------------------------|------------------------------------------------------------------------------------------------------------------------------------------------------------------------------------------------------------------------------------------------------------------------------------------------------------------------------------------------------------------------------------------------------------------------------------------------------------------------------------------------------------------------------------------------------------------------------------------------------------------------------------------------------------------------------------------------------------------------------------------------------------------------------------------------------------------------------------------------------------------------------------------------------------|
| 1        | <i>camelopardalis</i> _BaNP4_1   | 2                          | BaNP4_1; BaNP4_2                                                                                                                                                                                                                                                                                                                                                                                                                                                                                                                                                                                                                                                                                                                                                                                                                                                                                           |
| 2        | <i>camelopardalis</i> _ETH1_1    | 37                         | ETH1_1; ETH2_1; ETH3_1; GNP02_1; GNP04_1; MF02_1; MF02_2; MF03_1; MF04_1; MF04_2; MF05_1; MF06_1; MF11_1; MF13_1; MF14_1; MF16_1; MF17_1; MF24_1; MF24_2; RET4_1; RET5_1; RET5_2; RET6_1; RETWil2_1; ISC04_1; LWC01_1; SNR1_1; SNR1_2; SNR2_1; SNR2_2; WA036_1; WA606_1; WA606_2; WA612_1; WA621_1; ZNP01_1; ZNP01_2                                                                                                                                                                                                                                                                                                                                                                                                                                                                                                                                                                                       |
| 3        | <i>camelopardalis</i> _ETH1_2    | 38                         | ETH1_2; ETH2_2; ETH3_2; GNP01_1; GNP01_2; GNP02_2; GNP03_1; GNP03_2; GNP04_2; GNP05_1; GNP05_2; MF01_1; MF06_2; MF11_2; MF13_2; MF16_2; RET3_1; RET3_2; RETRot1_1; RETRot1_2; RETRot2_1; RETWil_1; RETWil2_2; ISC03_1; ISC08_1; ISC08_2; WA026_2; WA036_2; WA117_2; WA612_2; WA614_1; WA622_1; WA622_2; WA623_1; WA623_2; WA705_2; WA707_1; WA707_2                                                                                                                                                                                                                                                                                                                                                                                                                                                                                                                                                        |
| 4        | <i>rothschildi</i> _MF01_2       | 11                         | MF01_2; MF03_2; MF05_2; MF07_1; MF07_2; MF09_1; MF09_2; MF14_2; MF15_1; MF15_2; MF17_2                                                                                                                                                                                                                                                                                                                                                                                                                                                                                                                                                                                                                                                                                                                                                                                                                     |
| 5        | <i>peralta</i> _WA026_1          | 1                          | WA026_1                                                                                                                                                                                                                                                                                                                                                                                                                                                                                                                                                                                                                                                                                                                                                                                                                                                                                                    |
| 6        | <i>peralta</i> _WA609_1          | 5                          | WA609_1; WA609_2; WA619_2; WA621_2; WA700_2                                                                                                                                                                                                                                                                                                                                                                                                                                                                                                                                                                                                                                                                                                                                                                                                                                                                |
| 7        | <i>peralta</i> _WA614_2          | 3                          | WA614_2; WA708_2; WA720_2                                                                                                                                                                                                                                                                                                                                                                                                                                                                                                                                                                                                                                                                                                                                                                                                                                                                                  |
| 8        | <i>peralta</i> _WA117_1          | 6                          | WA117_1; WA619_1; WA700_1; WA705_1; WA708_1; WA720_1                                                                                                                                                                                                                                                                                                                                                                                                                                                                                                                                                                                                                                                                                                                                                                                                                                                       |
| 9        | <i>reticulata</i> _RET1_1        | 6                          | RET1_1; RET1_2; RETRot2_2; RETRot3_2; ISC04_2; LWC01_2                                                                                                                                                                                                                                                                                                                                                                                                                                                                                                                                                                                                                                                                                                                                                                                                                                                     |
| 10       | <i>reticulata</i> _RET4_2        | 4                          | RET4_2; RET6_2; RETWil_2; ISC03_2                                                                                                                                                                                                                                                                                                                                                                                                                                                                                                                                                                                                                                                                                                                                                                                                                                                                          |
| 11       | <i>reticulata</i> _RETRot3_1     | 1                          | RETRot3_1                                                                                                                                                                                                                                                                                                                                                                                                                                                                                                                                                                                                                                                                                                                                                                                                                                                                                                  |
| 12       | <i>thornicrofti</i> _LVNP18_1    | 36                         | LVNP18_1; LVNP18_2; LVNP19_1; LVNP19_2; LVNP20_1; LVNP20_2; LVNP21_1; LVNP21_2; LVNP22_1; LVNP22_2; LVNP23a_1; LVNP23a_2; LVNP31_1; LVNP31_2; LVNP32_1; LVNP32_2; LVNP33_1; LVNP33_2; LVNP34_1; LVNP34_2; LVNP35_1; LVNP35_2; LVNP36_1; LVNP36_2; SGR01_1; SGR01_2; SGR05_1; SGR05_2; SGR06_1; SGR07_1; SGR07_2; SGR12_1; SGR12_2; SGR13_1; SGR13_2; SGR14_1                                                                                                                                                                                                                                                                                                                                                                                                                                                                                                                                               |
| 13       | <i>tippelskirchi</i> _SGR06_2    | 1                          | SGR06_2                                                                                                                                                                                                                                                                                                                                                                                                                                                                                                                                                                                                                                                                                                                                                                                                                                                                                                    |
| 14       | <i>tippelskirchi</i> _SGR14_2    | 1                          | SGR14_2                                                                                                                                                                                                                                                                                                                                                                                                                                                                                                                                                                                                                                                                                                                                                                                                                                                                                                    |
| 15       | <i>giraffa</i> _MGR01_2          | 1                          | MGR01_2                                                                                                                                                                                                                                                                                                                                                                                                                                                                                                                                                                                                                                                                                                                                                                                                                                                                                                    |
| 16       | <i>angolensis</i> _CKGR01_1      | 18                         | CKGR01_1; CKGR01_2; CKGR02_1; CKGR02_2; CKGR05_2; CNP03_2; ENP07_2; ENP08_1; ENP08_2; ENP09_2; ENP14_2; ENP15_1; ENP15_2; ENP16_1; ENP16_2; ENP17_2; ENP19_2; V29_2                                                                                                                                                                                                                                                                                                                                                                                                                                                                                                                                                                                                                                                                                                                                        |
| 17       | <i>giraffa</i> _BNP01_1          | 103                        | BNP01_1; BNP01_2; BNP02_1; BNP02_2; BNP03_1; BNP03_2; BNP04_1; BNP04_2; BNP05_1; BNP05_2; BNP06_1; BNP06_2; BNP09_1; BNP09_2; CKGR03_1; CKGR03_2; CKGR05_1; CNP01_1; CNP01_2; CNP02_1; CNP02_2; CNP03_1; ENP04_1; ENP04_2; ENP07_1; ENP09_1; ENP11_1; ENP11_2; ENP12_1; ENP12_2; ENP14_1; ENP17_1; ENP18_1; ENP18_2; ENP19_1; ENP20_1; ENP20_2; ENP21_1; ENP21_2; KKR01_1; KKR01_2; KKR02_1; KKR02_2; KKR03_1; KKR03_2; KKR04_1; KKR04_2; KKR05_1; KKR05_2; KKR07_1; KKR07_2; KKR08_1; KKR08_2; MGR01_1; MGR02_1; MGR02_2; MGR03_1; MGR03_2; MGR04_1; MGR04_2; MGR05_1; MGR05_2; MTNP01_1; MTNP01_2; MTNP02_1; MTNP02_2; MTNP03_1; MTNP03_2; SNNP_1; SNNP_2; SUN1_1; SUN1_2; SUN2_1; SUN2_2; SUN3_1; SUN3_2; SUN4_1; SUN4_2; V23_1; V23_2; V24_1; V24_2; V25_1; V25_2; V26_1; V26_2; V27_1; V27_2; V28_1; V28_2; V29_1; V30_1; V30_2; V31_1; V31_2; V36_1; V36_2; V37_1; V37_2; V38_1; V38_2; V39_1; V39_2 |



**Table U.** Overview of the respective alleles comprised by the haplotypes shown in the network of *USP54*.

| <b>n</b> | <b>Representative individual</b> | <b>Σ</b> | <b>Included Alleles per Haplotypes</b>                                                                                                                                                                                                                                                                                                                                                                                                                                                                                                                                                         |
|----------|----------------------------------|----------|------------------------------------------------------------------------------------------------------------------------------------------------------------------------------------------------------------------------------------------------------------------------------------------------------------------------------------------------------------------------------------------------------------------------------------------------------------------------------------------------------------------------------------------------------------------------------------------------|
| 1        | <i>camelopardalis</i> _BaNP4_1   | 35       | BaNP4_1; ETH1_1; ETH2_1; GNP05_1; MF01_1; MF02_1; MF03_1; MF03_2; MF05_1; MF05_2; MF06_1; MF07_1; MF09_1; MF09_2; MF11_1; MF13_1; MF14_1; MF15_1; MF15_2; MF16_1; MF16_2; MF17_1; MF17_2; MF24_1; MF24_2; RETRot2_1; SNR1_1; SNR2_1; WA026_1; WA026_2; WA036_1; WA606_1; WA606_2; WA700_1; WA720_1                                                                                                                                                                                                                                                                                             |
| 2        | <i>camelopardalis</i> _BaNP4_2   | 32       | BaNP4_2; ETH1_2; ETH2_2; GNP01_1; GNP01_2; GNP02_1; GNP02_2; GNP03_1; GNP03_2; GNP04_1; GNP04_2; GNP05_2; MF01_2; MF04_1; MF04_2; MF06_2; MF07_2; MF11_2; MF13_2; MF14_2; RET3_1; SNR1_2; SNR2_2; WA612_1; WA614_1; WA621_1; WA622_1; WA623_1; WA705_1; WA708_1; WA708_2; ZNP01_2                                                                                                                                                                                                                                                                                                              |
| 3        | <i>camelopardalis</i> _ETH3_1    | 1        | ETH3_1                                                                                                                                                                                                                                                                                                                                                                                                                                                                                                                                                                                         |
| 4        | <i>camelopardalis</i> _ETH3_2    | 1        | ETH3_2                                                                                                                                                                                                                                                                                                                                                                                                                                                                                                                                                                                         |
| 5        | <i>antiquorum</i> _ZNP01_1       | 1        | ZNP01_1                                                                                                                                                                                                                                                                                                                                                                                                                                                                                                                                                                                        |
| 6        | <i>rothschildi</i> _MF02_2       | 1        | MF02_2                                                                                                                                                                                                                                                                                                                                                                                                                                                                                                                                                                                         |
| 7        | <i>reticulata</i> _RET1_1        | 20       | RET1_1; RET1_2; RET4_1; RET4_2; RET5_1; RET6_1; RET6_2; RETRot1_1; RETRot1_2; RETRot3_1; RETRot3_2; RETWil_1; RETWil_2; RETWil2_1; RETWil2_2; ISC03_1; ISC04_1; ISC04_2; ISC08_1; ISC08_2                                                                                                                                                                                                                                                                                                                                                                                                      |
| 8        | <i>reticulata</i> _RET3_2        | 2        | RET3_2; RETRot2_2                                                                                                                                                                                                                                                                                                                                                                                                                                                                                                                                                                              |
| 9        | <i>reticulata</i> _RET5_2        | 2        | RET5_2; ISC03_2                                                                                                                                                                                                                                                                                                                                                                                                                                                                                                                                                                                |
| 10       | <i>reticulata</i> _LWC01_1       | 18       | LWC01_1; WA036_2; WA117_1; WA117_2; WA609_1; WA609_2; WA612_2; WA614_2; WA619_1; WA619_2; WA621_2; WA622_2; WA623_2; WA700_2; WA705_2; WA707_1; WA707_2; WA720_2                                                                                                                                                                                                                                                                                                                                                                                                                               |
| 11       | <i>reticulata</i> _LWC01_2       | 1        | LWC01_2                                                                                                                                                                                                                                                                                                                                                                                                                                                                                                                                                                                        |
| 12       | <i>thornicrofti</i> _LVNP18_1    | 9        | LVNP18_1; LVNP18_2; LVNP20_1; LVNP20_2; LVNP21_2; LVNP23a_2; LVNP31_2; LVNP32_2; LVNP36_2                                                                                                                                                                                                                                                                                                                                                                                                                                                                                                      |
| 13       | <i>thornicrofti</i> _LVNP19_1    | 21       | LVNP19_1; LVNP19_2; LVNP21_1; LVNP22_1; LVNP22_2; LVNP23a_1; LVNP32_1; LVNP33_1; LVNP33_2; LVNP35_1; LVNP35_2; LVNP36_1; SGR01_1; SGR01_2; SGR06_1; SGR06_2; SGR07_1; SGR13_1; SGR13_2; SGR14_1; SGR14_2                                                                                                                                                                                                                                                                                                                                                                                       |
| 14       | <i>thornicrofti</i> _LVNP34_2    | 2        | LVNP34_2; SGR05_1                                                                                                                                                                                                                                                                                                                                                                                                                                                                                                                                                                              |
| 15       | <i>giraffa</i> _MTNP02_2         | 1        | MTNP02_2                                                                                                                                                                                                                                                                                                                                                                                                                                                                                                                                                                                       |
| 16       | <i>tippelskirchi</i> _SGR05_2    | 1        | SGR05_2                                                                                                                                                                                                                                                                                                                                                                                                                                                                                                                                                                                        |
| 17       | <i>tippelskirchi</i> _SGR07_2    | 3        | SGR07_2; SGR12_1; SGR12_2;                                                                                                                                                                                                                                                                                                                                                                                                                                                                                                                                                                     |
| 18       | <i>angolensis</i> _CKGR05_1      | 67       | CKGR05_1; CNP01_1; CNP02_1; CNP03_1; ENP04_1; ENP04_2; ENP07_1; ENP07_2; ENP08_1; ENP08_2; ENP09_1; ENP11_1; ENP11_2; ENP15_1; ENP16_1; ENP16_2; ENP17_1; ENP17_2; ENP18_1; ENP18_2; ENP19_1; ENP19_2; ENP20_1; ENP21_1; KKR01_1; KKR01_2; KKR03_1; KKR04_1; KKR04_2; KKR05_1; KKR07_1; LVNP31_1; LVNP34_1; MGR01_1; MGR01_2; MGR02_1; MGR02_2; MGR03_1; MGR03_2; MGR04_1; MGR05_1; MGR05_2; MTNP01_1; MTNP01_2; MTNP03_1; MTNP03_2; SUN1_1; SUN1_2; SUN2_1; SUN2_2; SUN3_1; SUN3_2; SUN4_1; SUN4_2; V23_1; V26_1; V27_1; V28_1; V29_1; V29_2; V30_1; V30_2; V31_1; V37_1; V38_1; V38_2; V39_1 |
| 19       | <i>giraffa</i> _BNP01_1          | 56       | BNP01_1; BNP01_2; BNP02_1; BNP02_2; BNP03_1; BNP03_2; BNP04_1; BNP04_2; BNP05_1; BNP05_2; BNP06_1; BNP06_2; BNP09_1; BNP09_2; CKGR01_1; CKGR01_2; CKGR02_1; CKGR02_2; CKGR03_1; CKGR03_2; CKGR05_2; CNP01_2; CNP02_2; CNP03_2; ENP09_2; ENP12_1; ENP12_2; ENP14_1; ENP14_2; ENP15_2; ENP20_2; ENP21_2; KKR02_1; KKR02_2; KKR03_2; KKR05_2; KKR07_2; KKR08_1; KKR08_2; MGR04_2; MTNP02_1; SNNP_1; SNNP_2; V23_2; V24_1; V24_2; V25_1; V25_2; V26_2; V27_2; V28_2; V31_2; V36_1; V36_2; V37_2; V39_2                                                                                             |

**Tables V-Ap.** List of alleles comprised by the haplotypes shown in the haplowebs constructed for each of the 21 nuclear introns (Fig 4).

**Table V.** Overview of the alleles comprised by the haplotypes shown in the haploweb of *ACP5*. Groups of individuals sharing an exclusive allele pool [field for recombination: FFR] are highlighted by a grey box.

| n  | Representative allele          | $\Sigma$ | Allele sharing information                                                                                                                                                                                                                                                                                                                                                                                                                                                                                         |
|----|--------------------------------|----------|--------------------------------------------------------------------------------------------------------------------------------------------------------------------------------------------------------------------------------------------------------------------------------------------------------------------------------------------------------------------------------------------------------------------------------------------------------------------------------------------------------------------|
| 1  | <i>giraffa</i> _BNP01_1        | 58       | BNP01_1; BNP02_1; BNP03_1; BNP04_1; BNP05_1; BNP06_1; BNP09_1; CKGR01_1; CKGR02_1; CKGR03_1; CKGR05_1; CNP02_1; CNP03_1; ENP04_1; ENP07_1; ENP08_1; ENP09_1; ENP11_1; ENP12_1; ENP14_1; ENP15_1; ENP16_1; ENP17_1; ENP18_1; ENP19_1; ENP20_1; ENP21_1; KKR01_1; KKR02_1; KKR03_1; KKR04_1; KKR05_1; KKR07_1; KKR08_1; MGR02_1; MGR03_1; MGR04_1; MGR05_1; MTNP01_1; MTNP02_1; MTNP03_1; SNNP_1; SUN1_1; SUN2_1; SUN3_1; SUN4_1; V23_1; V24_1; V25_1; V26_1; V27_1; V28_1; V29_1; V30_1; V31_1; V36_1; V38_1; V39_1 |
| 2  | <i>giraffa</i> _CNP03_2        | 7        | CNP03_2; MGR02_2; V27_2; V38_2; V39_2; MGR01_1; V37_1                                                                                                                                                                                                                                                                                                                                                                                                                                                              |
| 3  | <i>angolensis</i> _ENP07_2     | 4        | ENP07_2; ENP11_2; ENP14_2; ENP17_2                                                                                                                                                                                                                                                                                                                                                                                                                                                                                 |
| 4  | <i>giraffa</i> _MGR05_2        | 4        | MGR05_2; MTNP01_2; MTNP03_2; SNNP_2                                                                                                                                                                                                                                                                                                                                                                                                                                                                                |
| 5  | <i>giraffa</i> _V23_2          | 3        | V23_2; V36_2; CNP01_1                                                                                                                                                                                                                                                                                                                                                                                                                                                                                              |
| 6  | <i>thornicrofti</i> _LVNP18_1  | 3        | LVNP18_1; LVNP19_1; LVNP21_1                                                                                                                                                                                                                                                                                                                                                                                                                                                                                       |
| 7  | <i>thornicrofti</i> _LVNP33_1  | 1        | LVNP33_1                                                                                                                                                                                                                                                                                                                                                                                                                                                                                                           |
| 8  | <i>thornicrofti</i> _LVNP22_1  | 5        | LVNP22_1; LVNP23a_1; LVNP31_1; LVNP32_1; LVNP34_1                                                                                                                                                                                                                                                                                                                                                                                                                                                                  |
| 9  | <i>thornicrofti</i> _LVNP20_1  | 11       | LVNP20_1; LVNP22_2; LVNP35_1; LVNP36_2; SGR01_1; SGR05_1; SGR06_1; SGR07_1; SGR12_1; SGR13_1; SGR14_1                                                                                                                                                                                                                                                                                                                                                                                                              |
| 10 | <i>thornicrofti</i> _LVNP36_1  | 3        | LVNP36_1; MF11_2; RETWil2_2                                                                                                                                                                                                                                                                                                                                                                                                                                                                                        |
| 11 | <i>peralta</i> _WA700_1        | 1        | WA700_1                                                                                                                                                                                                                                                                                                                                                                                                                                                                                                            |
| 12 | <i>antiquorum</i> _GNP04_1     | 38       | GNP04_1; SNR1_1; WA026_1; WA117_1; WA614_1; WA619_1; WA622_1; ZNP01_1; ETH1_1; ETH2_1; GNP01_1; GNP02_1; GNP03_1; GNP05_1; MF01_1; MF02_1; MF03_2; MF04_1; MF05_2; MF06_1; MF07_1; MF09_1; MF13_1; MF14_2; MF15_1; MF16_1; MF17_1; MF24_1; RETRot3_1; SNR2_1; WA036_1; WA606_1; WA621_1; WA623_1; WA705_2; WA707_1; WA708_2; WA720_1                                                                                                                                                                               |
| 13 | <i>rothschildi</i> _MF14_1     | 2        | MF14_1; WA705_1                                                                                                                                                                                                                                                                                                                                                                                                                                                                                                    |
| 14 | <i>camelopardalis</i> _BaNP4_1 | 12       | BaNP4_1; ETH3_1; GNP04_2; SNR1_2; WA026_2; WA117_2; WA609_1; WA612_1; WA614_2; WA619_2; WA622_2; ZNP01_2                                                                                                                                                                                                                                                                                                                                                                                                           |
| 15 | <i>rothschildi</i> _MF03_1     | 2        | MF03_1; MF05_1                                                                                                                                                                                                                                                                                                                                                                                                                                                                                                     |
| 16 | <i>reticulata</i> _RETRot3_2   | 11       | RETRot3_2; RET1_1; RET3_1; RET4_1; RET5_1; RET6_1; RETRot1_1; RETRot2_1; ISC03_1; ISC04_1; LWC01_1                                                                                                                                                                                                                                                                                                                                                                                                                 |
| 17 | <i>reticulata</i> _RETWil_1    | 1        | RETWil_1                                                                                                                                                                                                                                                                                                                                                                                                                                                                                                           |

**Table W.** Overview of the alleles comprised by the haplotypes shown in the haploweb of *Clorf74*. Groups of individuals sharing an exclusive allele pool [field for recombination: FFR] are highlighted by a grey box.

| n | Representative allele          | Σ  | Allele sharing information                                                                                                                                                                                                                                                                                                                                                                                                                                                                                                                  |
|---|--------------------------------|----|---------------------------------------------------------------------------------------------------------------------------------------------------------------------------------------------------------------------------------------------------------------------------------------------------------------------------------------------------------------------------------------------------------------------------------------------------------------------------------------------------------------------------------------------|
| 1 | <i>giraffa</i> _BNP01_1        | 61 | BNP01_1; BNP02_1; BNP03_1; BNP04_1; BNP05_1; BNP06_1; BNP09_1; CKGR01_1; CKGR02_1; CKGR03_1; CKGR05_1; CNP01_1; CNP02_1; CNP03_1; ENP04_1; ENP07_1; ENP08_1; ENP09_1; ENP11_1; ENP12_1; ENP14_1; ENP15_1; ENP16_1; ENP17_1; ENP18_1; ENP19_1; ENP20_1; ENP21_1; KKR01_1; KKR02_1; KKR03_1; KKR04_1; KKR05_1; KKR07_1; KKR08_1; MGR01_1; MGR02_1; MGR03_1; MGR04_1; MGR05_1; MTNP01_1; MTNP02_1; MTNP03_1; SNNP_1; SUN1_1; SUN2_1; SUN3_1; SUN4_1; V23_1; V24_1; V25_1; V26_1; V27_1; V28_1; V29_1; V30_1; V31_1; V36_1; V37_1; V38_1; V39_1 |
| 2 | <i>thornicrofti</i> _LVNP18_1  | 19 | LVNP18_1; LVNP19_1; LVNP20_1; LVNP21_1; LVNP22_1; LVNP23a_1; LVNP31_1; LVNP32_1; LVNP33_1; LVNP34_1; LVNP35_1; LVNP36_1; SGR01_1; SGR05_1; SGR06_1; SGR07_1; SGR12_1; SGR13_1; SGR14_2                                                                                                                                                                                                                                                                                                                                                      |
| 3 | <i>camelopardalis</i> _BaNP4_1 | 2  | BaNP4_1; MF07_1                                                                                                                                                                                                                                                                                                                                                                                                                                                                                                                             |
| 4 | <i>camelopardalis</i> _ETH1_1  | 45 | ETH1_1; ETH2_1; ETH3_1; GNP01_1; GNP02_1; GNP03_1; GNP04_1; GNP05_1; MF02_1; MF04_1; MF09_1; MF11_1; MF14_1; MF24_1; RET1_1; RET3_1; RET4_1; RET5_1; RETRot1_1; RETRot2_1; RETRot3_1; RETWil_1; ISC03_1; ISC04_1; ISC08_1; LWC01_1; SNR1_1; SNR2_1; WA026_1; WA036_1; WA117_1; WA606_1; WA609_1; WA612_1; WA614_1; WA619_1; WA621_1; WA622_1; WA623_1; WA700_1; WA705_1; WA707_1; WA708_1; WA720_1; ZNP01_1                                                                                                                                 |
| 5 | <i>reticulata</i> _RETRot1_2   | 5  | RETRot1_2; RETWil_2; ISC04_2; ISC08_2; RETWil2_1                                                                                                                                                                                                                                                                                                                                                                                                                                                                                            |
| 6 | <i>reticulata</i> _RET1_1      | 1  | RET1_2; RET4_2; RET5_2; RET6_1                                                                                                                                                                                                                                                                                                                                                                                                                                                                                                              |
| 7 | <i>reticulata</i> _RET3_2      | 6  | RET3_2; RETRot3_2; LWC01_2; MF05_1; MF06_1; MF15_1                                                                                                                                                                                                                                                                                                                                                                                                                                                                                          |
| 8 | <i>rothschildi</i> _MF02_2     | 8  | MF02_2; MF01_1; MF03_1; MF05_2; MF13_1; MF16_1; MF17_2; RETWil2_2                                                                                                                                                                                                                                                                                                                                                                                                                                                                           |

**Table X.** Overview of the alleles comprised by the haplotypes shown in the haploweb of *CCT2*. Groups of individuals sharing an exclusive allele pool [field for recombination: FFR] are highlighted by a grey box.

| n | Representative allele          | Σ  | Allele sharing information                                                                                                                                                                                                                                                                                                                                                                                                                                                                                                                                                                                                                                                                                                                                                                                                                                                    |
|---|--------------------------------|----|-------------------------------------------------------------------------------------------------------------------------------------------------------------------------------------------------------------------------------------------------------------------------------------------------------------------------------------------------------------------------------------------------------------------------------------------------------------------------------------------------------------------------------------------------------------------------------------------------------------------------------------------------------------------------------------------------------------------------------------------------------------------------------------------------------------------------------------------------------------------------------|
| 1 | <i>camelopardalis</i> _BaNP4_1 | 96 | BaNP4_1; BNP02_1; BNP03_1; BNP04_1; BNP05_1; BNP06_1; BNP09_1; CKGR01_1; CKGR02_1; CKGR03_1; CKGR05_1; CNP01_1; CNP02_1; CNP03_1; ENP04_1; ENP07_1; ENP09_1; ENP11_1; ENP12_1; ENP14_1; ENP15_1; ENP16_1; ENP17_1; ENP18_1; ENP19_1; ENP20_1; ENP21_1; GNP01_1; GNP05_1; KKR01_1; KKR02_1; KKR03_1; KKR04_1; KKR05_1; KKR07_1; KKR08_1; LVNP18_1; LVNP19_1; LVNP20_1; LVNP21_1; LVNP22_1; LVNP23a_1; LVNP31_1; LVNP32_1; LVNP33_1; LVNP34_1; LVNP35_1; LVNP36_1; MF01_1; MF03_1; MF06_1; MGR01_1; MGR02_1; MGR03_1; MGR04_1; MGR05_1; MTNP01_1; MTNP02_1; MTNP03_1; RET1_1; RET5_1; RET6_1; RETWil_1; SGR01_1; SGR05_1; SGR06_1; SGR07_1; SGR12_1; SGR13_1; SGR14_1; SNNP_1; SNR1_1; SUN1_1; SUN2_1; SUN3_1; SUN4_1; V23_1; V24_1; V25_1; V26_1; V27_1; V28_1; V29_1; V30_1; V31_1; V36_1; V37_1; V38_1; V39_1; WA026_1; WA036_1; WA117_1; WA606_1; WA707_1; WA708_1; ZNP01_1 |

|   |                                |    |                                                                                                                                                                                                                                                                                                                                                                                                                                              |
|---|--------------------------------|----|----------------------------------------------------------------------------------------------------------------------------------------------------------------------------------------------------------------------------------------------------------------------------------------------------------------------------------------------------------------------------------------------------------------------------------------------|
| 2 | <i>camelopardalis</i> _BaNP4_2 | 50 | BaNP4_2; GNP01_2; MF01_2; MF03_2; MF06_2; RET1_2; RET5_2; RET6_2; RETWil_2; WA036_2; WA606_2; WA707_2; ZNP01_2; BNP01_1; ENP08_1; ETH1_1; ETH2_1; GNP02_1; GNP03_1; GNP04_1; MF02_1; MF04_1; MF05_1; MF07_1; MF09_1; MF11_1; MF13_1; MF14_1; MF15_1; MF16_1; MF17_1; MF24_1; RET3_1; RET4_1; RETRot3_1; ISC03_1; ISC04_1; ISC08_1; LWC01_1; SNR2_1; WA609_1; WA612_1; WA614_1; WA619_1; WA621_1; WA622_1; WA623_1; WA700_1; WA705_1; WA720_1 |
| 3 | <i>antiquorum</i> _SNR1_2      | 2  | SNR1_2; ETH3_1                                                                                                                                                                                                                                                                                                                                                                                                                               |
| 4 | <i>reticulata</i> _RETWil2_2   | 3  | RETWil2_2; RETRot1_1; RETRot2_1                                                                                                                                                                                                                                                                                                                                                                                                              |
| 5 | <i>reticulata</i> _RET4_2      | 4  | RET4_2; RETRot3_2; ISC04_2; RETWil2_1                                                                                                                                                                                                                                                                                                                                                                                                        |

**Table Y.** Overview of the alleles comprised by the haplotypes shown in the haploweb of *COL5A2*. Groups of individuals sharing an exclusive allele pool [field for recombination: FFR] are highlighted by a grey box.

| n  | Representative allele          | $\Sigma$ | Allele sharing information                                                                                                                                                                                                                                                                                                                                                                                                                                                                                                                                                               |
|----|--------------------------------|----------|------------------------------------------------------------------------------------------------------------------------------------------------------------------------------------------------------------------------------------------------------------------------------------------------------------------------------------------------------------------------------------------------------------------------------------------------------------------------------------------------------------------------------------------------------------------------------------------|
| 1  | <i>camelopardalis</i> _BaNP4_1 | 12       | BaNP4_1; MF01_1; MF03_1; MF04_1; MF06_1; MF09_1; MF13_1; MF14_1; MF15_1; MF16_1; MF17_1; MF24_1                                                                                                                                                                                                                                                                                                                                                                                                                                                                                          |
| 2  | <i>rothschildi</i> _MF01_2     | 31       | MF01_2; MF03_2; MF06_2; MF17_2; MF24_2; RETRot1_1; ETH1_1; ETH2_1; ETH3_1; GNP01_1; GNP02_1; GNP03_1; GNP04_1; GNP05_1; MF05_1; MF07_1; MF11_1; RETRot2_1; SNR1_1; SNR2_1; WA606_1; WA609_1; WA612_1; WA614_1; WA619_1; WA621_1; WA700_1; WA705_1; WA708_1; WA720_1; ZNP01_1                                                                                                                                                                                                                                                                                                             |
| 3  | <i>rothschildi</i> _MF09_2     | 6        | MF09_2; WA609_2; MF02_2; RET3_2; RETWil2_1; LWC01_2                                                                                                                                                                                                                                                                                                                                                                                                                                                                                                                                      |
| 4  | <i>rothschildi</i> _MF13_2     | 2        | MF13_2; MF02_1                                                                                                                                                                                                                                                                                                                                                                                                                                                                                                                                                                           |
| 5  | <i>peralta</i> _WA612_2        | 8        | WA612_2; WA619_2; WA700_2; WA720_2; WA026_1; WA036_1; WA622_1; WA623_1                                                                                                                                                                                                                                                                                                                                                                                                                                                                                                                   |
| 6  | <i>reticulata</i> _RET6_1      | 7        | RET6_1; ISC04_1; RET3_1; LWC01_1; RET4_1; ISC03_1; RET5_1                                                                                                                                                                                                                                                                                                                                                                                                                                                                                                                                |
| 7  | <i>reticulata</i> _RET1_2      | 3        | RET1_2; RET4_2; ISC03_2                                                                                                                                                                                                                                                                                                                                                                                                                                                                                                                                                                  |
| 8  | <i>reticulata</i> _RETRot3_2   | 2        | RETRot3_2; RETWil_1                                                                                                                                                                                                                                                                                                                                                                                                                                                                                                                                                                      |
| 9  | <i>giraffa</i> _BNP06_2        | 6        | BNP06_2; ENP17_2; MGR01_2; MGR04_2; V23_2; V29_2                                                                                                                                                                                                                                                                                                                                                                                                                                                                                                                                         |
| 10 | <i>giraffa</i> _BNP01_1        | 66       | BNP01_1; BNP02_1; BNP03_1; BNP04_1; BNP05_1; BNP06_1; BNP09_1; CKGR01_1; CKGR02_1; CKGR03_1; CKGR05_1; CNP01_1; CNP02_1; CNP03_1; ENP04_1; ENP07_1; ENP08_1; ENP09_1; ENP11_1; ENP12_1; ENP14_1; ENP15_1; ENP16_1; ENP17_1; ENP18_1; ENP19_1; ENP20_1; ENP21_1; KKR01_1; KKR02_1; KKR03_1; KKR04_1; KKR05_1; KKR07_1; KKR08_1; MGR01_1; MGR02_1; MGR03_1; MGR04_1; MGR05_1; MTNP01_1; MTNP02_1; MTNP03_1; RET1_1; RET6_2; RETRot1_2; ISC04_2; ISC08_1; SNNP_1; SUN1_1; SUN2_1; SUN3_1; SUN4_1; V23_1; V24_1; V25_1; V26_1; V27_1; V28_1; V29_1; V30_1; V31_1; V36_1; V37_1; V38_1; V39_1 |
| 11 | <i>peralta</i> _WA707_1        | 1        | WA707_1                                                                                                                                                                                                                                                                                                                                                                                                                                                                                                                                                                                  |
| 12 | <i>thornicrofti</i> _LVNP18_1  | 19       | LVNP18_1; LVNP19_1; LVNP20_1; LVNP21_1; LVNP22_1; LVNP23a_1; LVNP31_1; LVNP32_1; LVNP33_1; LVNP34_1; LVNP35_1; LVNP36_1; SGR01_1; SGR05_1; SGR06_1; SGR07_2; SGR12_1; SGR13_1; SGR14_1                                                                                                                                                                                                                                                                                                                                                                                                   |
| 13 | <i>thornicrofti</i> _LVNP33_2  | 2        | LVNP33_2; LVNP34_2                                                                                                                                                                                                                                                                                                                                                                                                                                                                                                                                                                       |

**Table Z.** Overview of the alleles comprised by the haplotypes shown in the haploweb of *CTAGE5*. Groups of individuals sharing an exclusive allele pool [field for recombination: FFR] are highlighted by a grey box.

| n  | Representative allele          | $\Sigma$ | Allele sharing information                                                                                                                                                                                                                                                                                                                                                                                                                                             |
|----|--------------------------------|----------|------------------------------------------------------------------------------------------------------------------------------------------------------------------------------------------------------------------------------------------------------------------------------------------------------------------------------------------------------------------------------------------------------------------------------------------------------------------------|
| 1  | <i>camelopardalis</i> _BaNP4_1 | 28       | BaNP4_1; ETH3_1; MF01_1; MF02_1; MF03_1; MF04_1; MF05_1; MF06_1; MF07_1; MF09_1; MF11_1; MF13_1; MF14_1; MF15_1; MF24_1; RET1_1; RET4_1; RET5_1; RET6_1; RETRot1_1; RETRot2_1; RETRot3_1; RETWil_1; ISC03_1; ISC08_1; WA036_1; WA619_1; WA623_1                                                                                                                                                                                                                        |
| 2  | <i>camelopardalis</i> _ETH3_2  | 44       | ETH3_2; MF01_2; MF03_2; MF04_2; MF05_2; MF06_2; MF07_2; MF09_2; MF11_2; MF13_2; MF14_2; MF15_2; RETRot2_2; RETRot3_2; RETWil_2; ISC03_2; ISC08_2; WA036_2; ETH1_1; ETH2_2; GNP01_1; GNP02_1; GNP03_1; GNP04_1; GNP05_1; MF16_1; MF17_1; RET3_1; SNR1_1; SNR2_1; WA026_1; WA117_1; WA606_1; WA609_1; WA612_1; WA614_1; WA621_1; WA622_1; WA700_1; WA705_2; WA707_1; WA708_2; WA720_1; ZNP01_1                                                                           |
| 3  | <i>peralta</i> _WA619_2        | 4        | WA619_2; WA623_2; WA705_1; WA708_1                                                                                                                                                                                                                                                                                                                                                                                                                                     |
| 4  | <i>peralta</i> _WA026_2        | 2        | WA026_2; WA720_2                                                                                                                                                                                                                                                                                                                                                                                                                                                       |
| 5  | <i>reticulata</i> _LWC01_1     | 1        | LWC01_1                                                                                                                                                                                                                                                                                                                                                                                                                                                                |
| 6  | <i>reticulata</i> _RETWil2_2   | 2        | RETWil2_2; ISC04_1                                                                                                                                                                                                                                                                                                                                                                                                                                                     |
| 7  | <i>thornicrofti</i> _LVNP18_1  | 16       | LVNP18_1; LVNP19_1; LVNP20_1; LVNP21_1; LVNP22_1; LVNP23a_1; LVNP31_1; LVNP32_1; LVNP33_1; LVNP34_1; LVNP35_1; LVNP36_1; SGR01_2; SGR06_1; SGR12_2; SGR14_1                                                                                                                                                                                                                                                                                                            |
| 8  | <i>giraffa</i> _BNP01_1        | 53       | BNP01_1; BNP02_1; BNP03_1; BNP04_1; BNP05_1; BNP06_1; BNP09_1; CKGR01_1; CKGR02_1; CNP01_1; CNP03_1; ENP04_1; ENP07_1; ENP08_1; ENP09_1; ENP11_1; ENP12_1; ENP14_1; ENP15_1; ENP16_1; ENP17_1; ENP18_1; ENP19_1; ENP20_1; ENP21_1; KKR01_1; KKR02_1; KKR03_1; KKR04_1; KKR05_1; MGR01_1; MGR02_1; MGR03_1; MGR04_1; MGR05_1; MTNP01_1; MTNP02_1; MTNP03_1; SNNP_1; SUN1_1; SUN2_1; SUN3_1; V23_1; V24_1; V25_1; V26_1; V27_1; V28_1; V30_1; V31_1; V36_1; V37_1; V39_1 |
| 9  | <i>giraffa</i> _BNP01_2        | 15       | BNP01_2; BNP09_2; ENP04_2; ENP17_2; ENP18_2; KKR01_2; KKR03_2; SUN2_2; SUN3_2; V24_2; CKGR03_1; CKGR05_1; KKR08_1; SUN4_1; V29_1                                                                                                                                                                                                                                                                                                                                       |
| 10 | <i>giraffa</i> _BNP04_2        | 4        | BNP04_2; V29_2; KKR07_1; V38_2                                                                                                                                                                                                                                                                                                                                                                                                                                         |
| 11 | <i>giraffa</i> _MTNP01_2       | 3        | MTNP01_2; MTNP03_2; V38_1                                                                                                                                                                                                                                                                                                                                                                                                                                              |
| 12 | <i>giraffa</i> _CNP02_1        | 1        | CNP02_1                                                                                                                                                                                                                                                                                                                                                                                                                                                                |

**Table Aa.** Overview of the alleles comprised by the haplotypes shown in the haploweb of *CWF19L1*. Groups of individuals sharing an exclusive allele pool [field for recombination: FFR] are highlighted by a grey box.

| n | Representative allele         | Σ  | Allele sharing information                                                                                                                                                                                                                                                                                                                                                                                                                                                                                                                                                                                                                                                   |
|---|-------------------------------|----|------------------------------------------------------------------------------------------------------------------------------------------------------------------------------------------------------------------------------------------------------------------------------------------------------------------------------------------------------------------------------------------------------------------------------------------------------------------------------------------------------------------------------------------------------------------------------------------------------------------------------------------------------------------------------|
| 1 | <i>camelopardalis_BaNP4_1</i> | 48 | BaNP4_1; ETH1_1; ETH2_1; ETH3_1; GNP01_1; GNP03_1; GNP04_1; GNP05_1; MF02_1; MF03_1; MF04_1; MF06_1; MF09_2; MF15_2; MF17_2; MF24_2; RET1_1; RET3_1; RET4_1; RET5_1; RET6_1; RETRot1_1; RETRot2_1; RETRot3_1; RETWil_1; RETWil2_1; ISC03_1; ISC04_1; ISC08_1; LWC01_1; SNR1_1; SNR2_1; WA026_1; WA036_1; WA117_1; WA606_1; WA609_1; WA612_1; WA614_1; WA619_1; WA621_1; WA622_1; WA623_1; WA700_1; WA705_1; WA707_1; WA720_1; ZNP01_1                                                                                                                                                                                                                                        |
| 2 | <i>camelopardalis_BaNP4_2</i> | 22 | BaNP4_2; ETH1_2; GNP01_2; GNP03_2; GNP05_2; MF02_2; MF03_2; MF04_2; MF06_2; MF09_1; MF15_1; MF17_1; MF24_1; RETWil_2; ISC03_2; SNR2_2; GNP02_1; MF01_1; MF05_1; MF07_1; MF11_1; MF16_1                                                                                                                                                                                                                                                                                                                                                                                                                                                                                       |
| 3 | <i>rothschildi_MF13_1</i>     | 2  | MF13_1; MF14_1                                                                                                                                                                                                                                                                                                                                                                                                                                                                                                                                                                                                                                                               |
| 4 | <i>peralta_WA708_1</i>        | 1  | WA708_1                                                                                                                                                                                                                                                                                                                                                                                                                                                                                                                                                                                                                                                                      |
| 5 | <i>giraffa_BNP01_1</i>        | 74 | BNP01_1; BNP02_1; BNP04_1; BNP05_1; BNP09_1; CKGR02_1; CKGR03_1; CKGR05_1; CNP01_1; CNP02_1; CNP03_1; ENP04_1; ENP07_1; ENP08_1; ENP09_1; ENP11_1; ENP12_1; ENP14_1; ENP15_1; ENP16_1; ENP17_1; ENP20_1; ENP21_1; KKR01_1; KKR03_1; KKR04_1; KKR05_1; KKR07_1; KKR08_1; LVNP18_1; LVNP19_1; LVNP20_1; LVNP21_1; LVNP22_1; LVNP23a_1; LVNP31_1; LVNP32_1; LVNP33_1; LVNP34_1; LVNP35_1; LVNP36_1; MGR01_1; MGR02_1; MGR03_1; MGR04_1; MGR05_1; MTNP01_1; MTNP02_1; MTNP03_1; SGR01_1; SGR05_1; SGR06_1; SGR07_1; SGR12_1; SGR13_1; SGR14_1; SNNP_1; SUN1_1; SUN2_1; SUN3_1; SUN4_1; V23_1; V24_1; V25_1; V26_1; V27_1; V28_1; V29_1; V30_1; V31_1; V36_1; V37_1; V38_1; V39_1 |
| 6 | <i>giraffa_BNP02_2</i>        | 21 | BNP02_2; CNP02_2; ENP04_2; ENP08_2; ENP15_2; ENP16_2; ENP20_2; ENP21_2; KKR04_2; MGR02_2; SGR07_2; SGR12_2; V28_2; V36_2; V38_2; BNP03_1; BNP06_1; CKGR01_1; ENP18_1; ENP19_1; KKR02_1                                                                                                                                                                                                                                                                                                                                                                                                                                                                                       |
| 7 | <i>giraffa_V27_1</i>          | 2  | V27_2; V39_2                                                                                                                                                                                                                                                                                                                                                                                                                                                                                                                                                                                                                                                                 |

**Table Ab.** Overview of the alleles comprised by the haplotypes shown in the haploweb of *DDXI*. Groups of individuals sharing an exclusive allele pool [field for recombination: FFR] are highlighted by a grey box.

| n | Representative allele         | Σ  | Allele sharing information                                                                                                                                                                                                                                                                                                                                                                                                                                                |
|---|-------------------------------|----|---------------------------------------------------------------------------------------------------------------------------------------------------------------------------------------------------------------------------------------------------------------------------------------------------------------------------------------------------------------------------------------------------------------------------------------------------------------------------|
| 1 | <i>camelopardalis_BaNP4_2</i> | 53 | BaNP4_2; ETH1_1; ETH2_1; ETH3_1; GNP01_1; GNP02_1; GNP03_1; GNP04_1; GNP05_1; MF01_1; MF02_1; MF03_1; MF04_1; MF05_1; MF06_1; MF07_1; MF09_1; MF11_1; MF13_1; MF14_1; MF15_1; MF16_1; MF17_1; MF24_1; RET1_2; RET3_1; RET6_2; RETRot2_1; RETWil_1; RETWil2_1; ISC03_1; ISC04_1; ISC08_1; LWC01_1; SNR1_1; SNR2_1; WA026_1; WA036_1; WA117_1; WA606_1; WA609_1; WA612_1; WA614_1; WA619_1; WA621_1; WA622_1; WA623_1; WA700_1; WA705_1; WA707_1; WA708_1; WA720_1; ZNP01_1 |
| 2 | <i>reticulata_RETWil2_2</i>   | 2  | RETWil2_2; ISC04_2                                                                                                                                                                                                                                                                                                                                                                                                                                                        |
| 3 | <i>reticulata_RET1_1</i>      | 6  | RET1_1; RET6_1; RET4_1; RET5_1; RETRot1_1; RETRot3_1                                                                                                                                                                                                                                                                                                                                                                                                                      |
| 4 | <i>giraffa_BNP01_1</i>        | 50 | BNP01_1; BNP02_1; BNP03_1; BNP04_1; BNP05_1; BNP06_1; BNP09_1; CKGR01_1; CKGR02_1; CKGR03_1; CKGR05_1; CNP01_1; CNP02_1;                                                                                                                                                                                                                                                                                                                                                  |

|   |                              |    |                                                                                                                                                                                                                                                                                                                                              |
|---|------------------------------|----|----------------------------------------------------------------------------------------------------------------------------------------------------------------------------------------------------------------------------------------------------------------------------------------------------------------------------------------------|
| 5 | <i>giraffa_MGR02_2</i>       | 3  | CNP03_1; ENP04_1; ENP07_1; ENP08_1; ENP09_1; ENP11_1; ENP12_1; ENP14_1; ENP15_1; ENP16_1; ENP17_1; ENP18_1; ENP19_1; ENP20_1; ENP21_1; MGR01_1; MGR02_1; MGR03_1; MGR04_1; MGR05_1; MTNP01_1; MTNP02_1; MTNP03_1; SNNP_1; V23_1; V24_1; V25_1; V26_1; V27_1; V28_1; V29_1; V30_1; V31_1; V36_1; V37_1; V38_1; V39_1<br>MGR02_2; V27_2; V39_2 |
| 6 | <i>giraffa_KKR01_1</i>       | 26 | KKR01_1; KKR02_1; KKR03_1; KKR04_1; KKR05_1; KKR07_1; KKR08_1; LVNP18_1; LVNP19_1; LVNP20_1; LVNP21_1; LVNP22_1; LVNP23a_1; LVNP31_1; LVNP32_1; LVNP34_1; LVNP35_1; SGR05_1; SGR06_1; SGR07_1; SGR12_1; SGR13_1; SUN1_1; SUN2_1; SUN3_1; SUN4_1                                                                                              |
| 7 | <i>thornicrofti_LVNP32_2</i> | 5  | LVNP32_2; LVNP33_1; LVNP36_2; SGR01_2; SGR14_2                                                                                                                                                                                                                                                                                               |
| 8 | <i>thornicrofti_LVNP36_1</i> | 3  | LVNP36_1; SGR01_1; SGR14_1                                                                                                                                                                                                                                                                                                                   |

**Table Ac.** Overview of the alleles comprised by the haplotypes shown in the haploweb of *DHX36*. Groups of individuals sharing an exclusive allele pool [field for recombination: FFR] are highlighted by a grey box.

| n | Representative allele         | ∑  | Allele sharing information                                                                                                                                                                                                                                                                                                                                                                                                                                                                                                                  |
|---|-------------------------------|----|---------------------------------------------------------------------------------------------------------------------------------------------------------------------------------------------------------------------------------------------------------------------------------------------------------------------------------------------------------------------------------------------------------------------------------------------------------------------------------------------------------------------------------------------|
| 1 | <i>camelopardalis_BaNP4_1</i> | 42 | BaNP4_1; ETH3_1; GNP03_1; LVNP18_1; LVNP19_1; LVNP20_1; LVNP21_1; LVNP22_1; LVNP23a_1; LVNP31_1; LVNP32_1; LVNP33_1; LVNP34_1; LVNP35_1; LVNP36_1; RET1_1; RET5_1; RET6_1; RETRot3_1; RETWil_1; RETWil2_1; ISC04_1; SGR01_1; SGR05_1; SGR06_1; SGR07_1; SGR12_1; SGR13_1; SGR14_1; SNR1_1; WA026_1; WA036_1; WA606_1; WA609_1; WA612_1; WA614_1; WA622_1; WA623_1; WA700_1; WA705_1; WA707_1; WA708_1                                                                                                                                       |
| 2 | <i>camelopardalis_ETH3_2</i>  | 24 | ETH3_2; ETH1_1; ETH2_2; GNP02_2; GNP04_2; MF01_1; MF02_1; MF03_2; MF04_1; MF05_1; MF06_1; MF07_1; MF09_1; MF11_1; MF13_2; MF14_1; MF15_1; MF16_1; MF17_1; MF24_2; LWC01_1; SNR2_1; WA117_1; WA720_2                                                                                                                                                                                                                                                                                                                                         |
| 3 | <i>reticulata_LWC01_2</i>     | 2  | LWC01_2; RETRot2_2                                                                                                                                                                                                                                                                                                                                                                                                                                                                                                                          |
| 4 | <i>reticulata_RETWil_2</i>    | 17 | RETWil_2; WA612_2; WA622_2; ETH2_1; GNP02_1; GNP04_1; MF03_1; MF13_1; MF24_1; WA720_1; GNP01_1; GNP05_1; RET3_1; RET4_1; RETRot1_1; WA619_1; ZNP01_1                                                                                                                                                                                                                                                                                                                                                                                        |
| 5 | <i>peralta_WA036_2</i>        | 4  | WA036_2; WA614_2; WA707_2; WA621_1                                                                                                                                                                                                                                                                                                                                                                                                                                                                                                          |
| 6 | <i>reticulata_RET5_2</i>      | 6  | RET5_2; RET6_2; RET4_2; RETRot1_2; RETRot2_1; ISC03_1                                                                                                                                                                                                                                                                                                                                                                                                                                                                                       |
| 7 | <i>antiquorum_GNP03_2</i>     | 2  | GNP03_2; SNR1_2                                                                                                                                                                                                                                                                                                                                                                                                                                                                                                                             |
| 8 | <i>giraffa_BNP01_1</i>        | 61 | BNP01_1; BNP02_1; BNP03_1; BNP04_1; BNP05_1; BNP06_1; BNP09_1; CKGR01_1; CKGR02_1; CKGR03_1; CKGR05_1; CNP01_1; CNP02_1; CNP03_1; ENP04_1; ENP07_1; ENP08_1; ENP09_1; ENP11_1; ENP12_1; ENP14_1; ENP15_1; ENP16_1; ENP17_1; ENP18_1; ENP19_1; ENP20_1; ENP21_1; KKR01_1; KKR02_1; KKR03_1; KKR04_1; KKR05_1; KKR07_1; KKR08_1; MGR01_1; MGR02_1; MGR03_1; MGR04_1; MGR05_1; MTNP01_1; MTNP02_1; MTNP03_1; SNNP_1; SUN1_1; SUN2_1; SUN3_1; SUN4_1; V23_1; V24_1; V25_1; V26_1; V27_1; V28_1; V29_1; V30_1; V31_1; V36_1; V37_1; V38_1; V39_1 |

**Table Ad.** Overview of the alleles comprised by the haplotypes shown in the haploweb of *IGF2B1*. Groups of individuals sharing an exclusive allele pool [field for recombination: FFR] are highlighted by a grey box.

| n  | Representative allele          | $\Sigma$ | Allele sharing information                                                                                                                                                                                                                                                                                                                                                                                                                                                                                                    |
|----|--------------------------------|----------|-------------------------------------------------------------------------------------------------------------------------------------------------------------------------------------------------------------------------------------------------------------------------------------------------------------------------------------------------------------------------------------------------------------------------------------------------------------------------------------------------------------------------------|
| 1  | <i>camelopardalis</i> _BaNP4_1 | 50       | BaNP4_1; ETH1_1; ETH2_1; ETH3_1; GNP01_1; GNP02_1; GNP04_1; MF01_1; MF02_1; MF03_1; MF04_1; MF05_1; MF06_1; MF07_1; MF09_1; MF11_1; MF13_1; MF16_1; MF17_1; MF24_1; RET1_1; RET3_1; RET4_1; RET5_1; RET6_1; RETRot1_1; RETRot2_1; RETRot3_1; RETWil_1; RETWil2_1; ISC03_1; ISC04_1; ISC08_1; LWC01_1; SGR01_1; SGR05_1; SGR06_1; SGR07_1; SGR12_1; SGR13_1; SGR14_1; SNR1_1; SNR2_1; WA117_1; WA612_1; WA614_1; WA621_1; WA623_1; WA700_1; WA708_1                                                                            |
| 2  | <i>antiquorum</i> _GNP01_2     | 2        | GNP01_2; SNR2_2                                                                                                                                                                                                                                                                                                                                                                                                                                                                                                               |
| 3  | <i>antiquorum</i> _GNP04_2     | 3        | GNP04_2; GNP03_1; ZNP01_1                                                                                                                                                                                                                                                                                                                                                                                                                                                                                                     |
| 4  | <i>peralta</i> _WA606_1        | 3        | WA606_1; WA619_1; WA622_1                                                                                                                                                                                                                                                                                                                                                                                                                                                                                                     |
| 5  | <i>peralta</i> _WA614_2        | 5        | WA614_2; WA623_2; WA619_2; WA622_2; WA707_1                                                                                                                                                                                                                                                                                                                                                                                                                                                                                   |
| 6  | <i>peralta</i> _WA036_2        | 4        | WA036_1; WA609_1; WA705_1; WA720_1                                                                                                                                                                                                                                                                                                                                                                                                                                                                                            |
| 7  | <i>rothschildi</i> _MF14_1     | 1        | MF14_1                                                                                                                                                                                                                                                                                                                                                                                                                                                                                                                        |
| 8  | <i>rothschildi</i> _MF15_1     | 1        | MF15_1                                                                                                                                                                                                                                                                                                                                                                                                                                                                                                                        |
| 9  | <i>thornicrofti</i> _LVNP18_2  | 12       | LVNP18_2; LVNP19_1; LVNP20_1; LVNP21_1; LVNP22_1; LVNP23a_1; LVNP31_1; LVNP32_2; LVNP33_1; LVNP34_1; LVNP35_1; LVNP36_1                                                                                                                                                                                                                                                                                                                                                                                                       |
| 10 | <i>giraffa</i> _BNP01_1        | 59       | BNP01_1; BNP02_1; BNP03_1; BNP04_1; BNP05_1; BNP06_1; BNP09_1; CKGR01_1; CKGR02_1; CKGR03_1; CKGR05_1; CNP01_1; CNP02_1; CNP03_1; ENP04_1; ENP07_1; ENP08_1; ENP09_1; ENP11_1; ENP12_1; ENP14_1; ENP15_1; ENP16_1; ENP17_1; ENP18_1; ENP19_1; ENP20_1; ENP21_1; KKR01_1; KKR02_1; KKR03_1; KKR04_1; KKR05_1; KKR07_1; KKR08_1; MGR01_1; MGR02_2; MGR03_1; MGR04_1; MGR05_1; MTNP01_1; MTNP02_1; MTNP03_1; SNNP_1; SUN1_1; SUN2_1; SUN3_1; SUN4_1; V23_1; V24_1; V26_1; V27_1; V28_1; V29_2; V30_1; V31_1; V36_1; V37_1; V39_1 |
| 11 | <i>giraffa</i> _ENP09_2        | 4        | ENP09_2; ENP17_2; ENP20_2; ENP21_2                                                                                                                                                                                                                                                                                                                                                                                                                                                                                            |
| 12 | <i>giraffa</i> _MGR02_1        | 3        | MGR02_1; V29_1; V25_1                                                                                                                                                                                                                                                                                                                                                                                                                                                                                                         |

**Table Ae.** Overview of the alleles comprised by the haplotypes shown in the haploweb of *MACF1*. Groups of individuals sharing an exclusive allele pool [field for recombination: FFR] are highlighted by a grey box.

| n | Representative allele          | $\Sigma$ | Allele sharing information                                                                                                                                                                                                                                                                                                                                                                                                                                                                                                                                                                                                       |
|---|--------------------------------|----------|----------------------------------------------------------------------------------------------------------------------------------------------------------------------------------------------------------------------------------------------------------------------------------------------------------------------------------------------------------------------------------------------------------------------------------------------------------------------------------------------------------------------------------------------------------------------------------------------------------------------------------|
| 1 | <i>camelopardalis</i> _BaNP4_1 | 68       | BaNP4_1; BNP03_1; BNP06_1; CNP01_1; ETH1_1; ETH2_1; ETH3_1; GNP05_1; LVNP18_1; LVNP19_1; LVNP20_1; LVNP21_1; LVNP22_1; LVNP23a_1; LVNP31_1; LVNP32_1; LVNP33_1; LVNP34_1; LVNP35_1; LVNP36_1; MF01_1; MF02_1; MF03_1; MF05_1; MF06_1; MF07_1; MF09_1; MF11_1; MF13_1; MF14_1; MF16_1; MF17_1; MF24_1; MGR01_1; MGR02_1; MGR03_1; MGR04_1; MGR05_1; RET1_1; RET4_1; RET5_1; RET6_1; RETRot1_1; RETRot2_1; RETRot3_1; RETWil_1; RETWil2_1; ISC04_1; ISC08_1; LWC01_1; SGR05_1; SGR06_1; SGR07_1; SGR12_1; SGR14_1; SNR1_1; SNR2_1; V36_1; WA026_1; WA117_1; WA606_1; WA614_1; WA623_1; WA700_1; WA705_1; WA707_1; WA720_1; ZNP01_1 |



|    |                              |    |                                                                                                                                                                                                                              |
|----|------------------------------|----|------------------------------------------------------------------------------------------------------------------------------------------------------------------------------------------------------------------------------|
| 2  | <i>camelopardalis_ETH1_2</i> | 6  | ETH1_2; WA606_2; WA614_2; GNP01_2; WA612_1; WA621_1                                                                                                                                                                          |
| 3  | <i>camelopardalis_ETH2_2</i> | 11 | ETH2_2; ETH3_2; MF01_2; MF02_2; MF06_2; MF07_2; MF11_2; MF14_2; MF17_2; MF04_1; ISC03_1                                                                                                                                      |
| 4  | <i>rothschildi_MF03_2</i>    | 18 | MF03_2; MF05_2; MF09_2; MF16_2; RET5_2; RETRot1_2; RETWil_2; ISC08_2; ZNP01_2; GNP01_1; GNP02_1; GNP03_1; GNP04_1; MF15_1; RET3_1; WA619_1; WA622_1; WA708_1                                                                 |
| 5  | <i>peralta_WA623_2</i>       | 6  | WA623_2; WA700_2; WA621_2; WA708_2; WA036_1; WA609_1                                                                                                                                                                         |
| 6  | <i>peralta_WA612_2</i>       | 2  | WA612_2; WA619_2                                                                                                                                                                                                             |
| 7  | <i>giraffa_CNP02_1</i>       | 2  | CNP02_1; V37_1                                                                                                                                                                                                               |
| 8  | <i>giraffa_KKR03_1</i>       | 16 | KKR03_1; KKR05_1; ENP04_1; ENP08_1; ENP17_1; ENP19_1; ENP20_1; MTNP02_1; MTNP01_1; MTNP03_1; SGR01_1; SGR13_1; V25_1; V27_1; V30_1; V39_1                                                                                    |
| 9  | <i>giraffa_BNP01_1</i>       | 26 | BNP01_1; BNP02_1; BNP04_1; BNP05_1; BNP09_1; CKGR01_1; CKGR02_1; CKGR03_1; CNP03_1; ENP21_1; KKR01_1; KKR03_2; KKR04_1; KKR05_2; KKR07_1; KKR08_1; SNNP_2; SUN1_1; SUN2_1; SUN3_1; SUN4_1; V23_1; V24_1; V26_1; V28_2; V31_1 |
| 10 | <i>giraffa_BNP03_2</i>       | 24 | BNP03_2; BNP06_2; CNP01_2; CKGR02_2; ENP21_2; CKGR05_1; CNP02_2; ENP04_2; ENP07_1; ENP08_2; ENP09_1; ENP11_1; ENP12_1; ENP14_1; ENP15_1; ENP16_1; ENP17_2; ENP18_1; ENP19_2; ENP20_2; MTNP02_2; V29_1; V37_2; V38_1          |

**Table Af.** Overview of the alleles comprised by the haplotypes shown in the haploweb of *NOTCH2*. Groups of individuals sharing an exclusive allele pool [field for recombination: FFR] are highlighted by a grey box.

| n | Representative allele         | ∑  | Allele sharing information                                                                                                                                                                                                                                                                                                                                                                                                                                                                                                                                                 |
|---|-------------------------------|----|----------------------------------------------------------------------------------------------------------------------------------------------------------------------------------------------------------------------------------------------------------------------------------------------------------------------------------------------------------------------------------------------------------------------------------------------------------------------------------------------------------------------------------------------------------------------------|
| 1 | <i>camelopardalis_BaNP4_1</i> | 62 | BaNP4_1; ETH1_1; ETH2_1; ETH3_1; GNP01_1; GNP02_1; GNP03_1; GNP04_1; GNP05_1; LVNP18_1; LVNP19_1; LVNP20_1; LVNP21_1; LVNP22_1; LVNP23a_1; LVNP31_1; LVNP32_1; LVNP33_1; LVNP34_1; LVNP35_1; LVNP36_1; MF01_1; MF02_1; MF03_1; MF04_1; MF05_1; MF09_1; MF13_1; MF15_1; MF16_1; MF17_1; MF24_1; RET3_1; RET4_1; RET5_1; RET6_1; RETRot1_1; RETRot2_1; RETWil_1; ISC03_1; ISC04_1; ISC08_1; LWC01_1; SGR05_1; SGR06_1; SGR07_1; SGR12_1; SGR13_1; SGR14_1; SNR1_1; SNR2_1; WA036_1; WA117_1; WA609_1; WA612_1; WA614_1; WA619_1; WA622_1; WA705_1; WA707_1; WA708_1; WA720_1 |
| 2 | <i>rothschildi_MF04_2</i>     | 10 | MF04_2; MF09_2; MF15_2; MF17_2; SNR1_2; MF06_1; MF07_1; MF11_1; MF14_1; ZNP01_1                                                                                                                                                                                                                                                                                                                                                                                                                                                                                            |
| 3 | <i>peralta_WA612_2</i>        | 4  | WA612_2; WA026_2; WA623_2; WA700_2                                                                                                                                                                                                                                                                                                                                                                                                                                                                                                                                         |
| 4 | <i>reticulata_RET3_2</i>      | 4  | RET3_2; LWC01_2; WA623_1; WA700_1                                                                                                                                                                                                                                                                                                                                                                                                                                                                                                                                          |
| 5 | <i>reticulata_RET4_2</i>      | 8  | RET4_2; RET6_2; RETRot1_2; RETRot2_2; RETWil_2; RET1_2; RETRot3_2; RETWil2_2                                                                                                                                                                                                                                                                                                                                                                                                                                                                                               |
| 6 | <i>reticulata_ISC03_2</i>     | 11 | ISC03_2; WA609_2; WA622_2; WA707_2; WA720_2; RET1_1; RETRot3_1; RETWil2_1; WA026_1; WA606_2; WA621_1                                                                                                                                                                                                                                                                                                                                                                                                                                                                       |
| 7 | <i>giraffa_BNP01_1</i>        | 62 | BNP01_1; BNP02_1; BNP03_1; BNP04_1; BNP05_1; BNP06_1; BNP09_1; CKGR01_1; CKGR02_1; CKGR03_1; CKGR05_1; CNP01_1; CNP02_1; CNP03_1; ENP04_1; ENP07_1; ENP08_1; ENP09_1; ENP11_1; ENP12_1; ENP14_1; ENP15_1; ENP16_1; ENP17_1; ENP18_1; ENP19_1; ENP20_1; ENP21_1; KKR01_1; KKR02_1; KKR03_1; KKR04_1; KKR05_1; KKR07_1; KKR08_1; MGR01_1; MGR02_1; MGR03_1; MGR04_1; MGR05_1; MTNP01_1; MTNP02_1; MTNP03_1; SGR01_2; SNNP_1; SUN1_1; SUN2_1; SUN3_1; SUN4_1; V23_1; V24_1; V25_1; V26_1; V27_1; V28_1; V29_1; V30_1; V31_1; V36_1; V37_1; V38_1; V39_1                       |

**Table Ag.** Overview of the alleles comprised by the haplotypes shown in the haploweb of *NUP155*. Groups of individuals sharing an exclusive allele pool [field for recombination: FFR] are highlighted by a grey box.

| <b>n</b> | <b>Representative allele</b>   | $\Sigma$ | <b>Allele sharing information</b>                                                                                                                                                                                                                                                                                                                                                                                                                                                                                                                                                                                                                                                                                                                                              |
|----------|--------------------------------|----------|--------------------------------------------------------------------------------------------------------------------------------------------------------------------------------------------------------------------------------------------------------------------------------------------------------------------------------------------------------------------------------------------------------------------------------------------------------------------------------------------------------------------------------------------------------------------------------------------------------------------------------------------------------------------------------------------------------------------------------------------------------------------------------|
| 1        | <i>camelopardalis</i> _BaNP4_1 | 2        | BaNP4_1; SNR1_1                                                                                                                                                                                                                                                                                                                                                                                                                                                                                                                                                                                                                                                                                                                                                                |
| 2        | <i>camelopardalis</i> _BaNP4_2 | 2        | BaNP4_2; SNR1_2                                                                                                                                                                                                                                                                                                                                                                                                                                                                                                                                                                                                                                                                                                                                                                |
| 3        | <i>camelopardalis</i> _ETH1_1  | 2        | ETH1_1; ETH3_1                                                                                                                                                                                                                                                                                                                                                                                                                                                                                                                                                                                                                                                                                                                                                                 |
| 4        | <i>camelopardalis</i> _ETH1_2  | 2        | ETH1_2; ETH3_2                                                                                                                                                                                                                                                                                                                                                                                                                                                                                                                                                                                                                                                                                                                                                                 |
| 5        | <i>peralta</i> _WA036_2        | 3        | WA036_2; WA619_2; WA708_2                                                                                                                                                                                                                                                                                                                                                                                                                                                                                                                                                                                                                                                                                                                                                      |
| 6        | <i>peralta</i> _WA117_2        | 15       | WA117_2; WA707_2; WA036_1; WA606_1; WA609_1; WA612_1; WA614_1; WA619_1; WA621_1; WA622_1; WA623_1; WA700_1; WA705_1; WA708_1; WA720_1                                                                                                                                                                                                                                                                                                                                                                                                                                                                                                                                                                                                                                          |
| 7        | <i>reticulata</i> _RET3_2      | 18       | RET3_2; MF01_2; MF03_2; MF17_2; MF24_2; RETWil2_2; MF02_1; MF04_1; MF05_1; MF06_1; MF07_1; MF11_1; MF13_1; MF14_1; MF15_1; WA026_1; WA117_1; WA707_1                                                                                                                                                                                                                                                                                                                                                                                                                                                                                                                                                                                                                           |
| 8        | <i>reticulata</i> _RETWil_2    | 12       | RETWil_2; LWC01_2; GNP01_1; GNP03_1; GNP05_1; RET3_1; RETRot1_1; RETRot2_1; RETRot3_2; ISC04_1; SNR2_1; ZNP01_1                                                                                                                                                                                                                                                                                                                                                                                                                                                                                                                                                                                                                                                                |
| 9        | <i>reticulata</i> _RETRot3_1   | 2        | RETRot3_1; RET6_2                                                                                                                                                                                                                                                                                                                                                                                                                                                                                                                                                                                                                                                                                                                                                              |
| 10       | <i>antiquorum</i> _GNP01_1     | 11       | GNP01_2; GNP03_2; GNP05_2; SNR2_2; GNP04_1; MF01_1; MF03_1; MF09_1; MF17_1; MF24_1; RETWil2_1                                                                                                                                                                                                                                                                                                                                                                                                                                                                                                                                                                                                                                                                                  |
| 11       | <i>thornicrofti</i> _LVNP31_1  | 1        | LVNP31_1                                                                                                                                                                                                                                                                                                                                                                                                                                                                                                                                                                                                                                                                                                                                                                       |
| 12       | <i>giraffa</i> _BNP01_1        | 85       | BNP01_1; BNP02_1; BNP03_1; BNP04_1; BNP05_1; BNP06_1; BNP09_1; CKGR01_1; CKGR02_1; CKGR03_1; CKGR05_1; CNP02_1; CNP03_1; ENP04_1; ENP07_1; ENP08_1; ENP09_1; ENP11_1; ENP12_1; ENP14_1; ENP15_1; ENP16_1; ENP17_1; ENP18_1; ENP19_1; ENP20_1; ENP21_1; ETH2_1; GNP02_1; KKR01_1; KKR02_1; KKR03_1; KKR04_1; KKR05_1; KKR07_1; KKR08_1; LVNP18_1; LVNP19_1; LVNP20_1; LVNP21_1; LVNP22_1; LVNP23a_1; LVNP32_1; LVNP33_1; LVNP34_1; LVNP35_1; LVNP36_1; MGR01_1; MGR02_1; MGR03_1; MGR04_1; MGR05_1; MTNP01_1; MTNP02_1; MTNP03_1; RET1_1; RETWil_1; ISC03_1; ISC08_1; LWC01_1; SGR01_1; SGR05_1; SGR06_1; SGR07_1; SGR12_1; SGR13_1; SGR14_1; SNNP_1; SUN1_1; SUN2_1; SUN3_1; SUN4_1; V23_1; V24_1; V25_1; V26_1; V27_1; V28_1; V29_1; V30_1; V31_1; V36_1; V37_1; V38_1; V39_1 |
| 13       | <i>giraffa</i> _CNP01_1        | 1        | CNP01_1                                                                                                                                                                                                                                                                                                                                                                                                                                                                                                                                                                                                                                                                                                                                                                        |

**Table Ah.** Overview of the alleles comprised by the haplotypes shown in the haploweb of *OTOF*. Groups of individuals sharing an exclusive allele pool [field for recombination: FFR] are highlighted by a grey box.

| n  | Representative allele          | $\Sigma$ | Allele sharing information                                                                                                                                                                                                                                                                                                                                                                                                                                                                          |
|----|--------------------------------|----------|-----------------------------------------------------------------------------------------------------------------------------------------------------------------------------------------------------------------------------------------------------------------------------------------------------------------------------------------------------------------------------------------------------------------------------------------------------------------------------------------------------|
| 1  | <i>camelopardalis</i> _BaNP4_1 | 26       | BaNP4_1; ETH1_1; GNP01_1; GNP02_1; GNP03_1; GNP04_1; GNP05_1; MF01_1; MF02_1; MF03_1; MF05_1; MF06_1; MF09_1; MF11_1; MF13_1; MF14_1; MF15_1; MF16_1; MF17_2; MF24_1; RETWil2_1; SNR1_1; SNR2_1; WA036_1; WA606_1; WA708_1                                                                                                                                                                                                                                                                          |
| 2  | <i>camelopardalis</i> _BaNP4_2 | 4        | BaNP4_2; WA026_2; WA705_1; WA720_1                                                                                                                                                                                                                                                                                                                                                                                                                                                                  |
| 3  | <i>antiquorum</i> _GNP01_2     | 20       | GNP01_2; GNP03_2; MF02_2; MF03_2; MF06_2; MF09_2; MF11_2; MF15_2; RET4_2; RETRot2_2; ETH2_1; ETH3_1; MF04_1; MF07_1; RET1_1; RET3_2; RET6_2; RETRot1_2; RETRot3_1; ISC04_1                                                                                                                                                                                                                                                                                                                          |
| 4  | <i>peralta</i> _WA700_1        | 4        | WA700_1; WA117_1; WA614_1; WA622_1                                                                                                                                                                                                                                                                                                                                                                                                                                                                  |
| 5  | <i>peralta</i> _WA606_2        | 6        | WA606_2; WA708_2; WA619_2; WA612_1; WA614_2; WA609_1                                                                                                                                                                                                                                                                                                                                                                                                                                                |
| 6  | <i>peralta</i> _WA705_2        | 2        | WA705_2; WA720_2                                                                                                                                                                                                                                                                                                                                                                                                                                                                                    |
| 7  | <i>peralta</i> _WA036_2        | 7        | WA036_2; WA026_1; WA117_2; WA612_2; WA621_1; WA623_1; WA707_1                                                                                                                                                                                                                                                                                                                                                                                                                                       |
| 8  | <i>reticulata</i> _RETWil2_2   | 8        | RETWil2_2; RET5_2; RETWil_2; ISC08_2; RET3_1; RET6_1; RETRot1_1; ISC03_1                                                                                                                                                                                                                                                                                                                                                                                                                            |
| 9  | <i>tippelskirchi</i> _SGR01_2  | 5        | SGR01_2; SGR07_2; LVNP31_1; SGR12_1; SGR13_1                                                                                                                                                                                                                                                                                                                                                                                                                                                        |
| 10 | <i>giraffa</i> _BNP01_1        | 57       | BNP01_1; BNP02_1; BNP03_1; BNP04_1; BNP05_1; BNP06_1; BNP09_1; CKGR03_1; CKGR05_1; CNP01_1; CNP02_1; CNP03_1; ENP04_1; ENP07_1; ENP08_1; ENP09_1; ENP11_1; ENP12_1; ENP14_1; ENP15_1; ENP16_1; ENP17_1; ENP18_1; ENP19_1; ENP20_1; ENP21_1; KKR01_1; KKR02_1; KKR03_1; KKR04_1; KKR05_1; KKR07_1; KKR08_1; MGR01_1; MGR02_1; MGR03_1; MGR04_1; MGR05_1; MTNP02_1; SNNP_1; SUN1_1; SUN2_1; SUN3_1; SUN4_1; V23_1; V24_1; V25_1; V26_1; V27_1; V28_1; V29_1; V30_1; V31_1; V36_1; V37_1; V38_1; V39_1 |
| 11 | <i>giraffa</i> _BNP02_2        | 43       | BNP02_2; BNP04_2; CKGR05_2; CNP02_2; ENP04_2; ENP07_2; ENP08_2; ENP09_2; ENP20_2; KKR07_2; MGR04_2; V24_2; V25_2; V26_2; V29_2; V30_2; V31_2; CKGR01_1; CKGR02_1; LVNP18_1; LVNP19_1; LVNP20_1; LVNP21_1; LVNP22_1; LVNP23a_1; LVNP32_1; LVNP34_1; LVNP36_1; MTNP01_1; MTNP03_1; RET4_1; RET5_1; RETRot2_1; RETWil_1; ISC08_1; LWC01_1; SGR01_1; SGR05_1; SGR06_1; SGR07_1; SGR14_1; WA619_1; WA700_2                                                                                               |
| 12 | <i>thornicrofti</i> _LVNP35_1  | 1        | LVNP35_1                                                                                                                                                                                                                                                                                                                                                                                                                                                                                            |
| 13 | <i>antiquorum</i> _ZNP01_1     | 1        | ZNP01_1                                                                                                                                                                                                                                                                                                                                                                                                                                                                                             |

**Table Ai.** Overview of the alleles comprised by the haplotypes shown in the haploweb of *PLCE1*. Groups of individuals sharing an exclusive allele pool [field for recombination: FFR] are highlighted by a grey box.

| n | Representative allele          | $\Sigma$ | Allele sharing information                                                                                                                                                                                                                                                                                                                                                                                                                                                                              |
|---|--------------------------------|----------|---------------------------------------------------------------------------------------------------------------------------------------------------------------------------------------------------------------------------------------------------------------------------------------------------------------------------------------------------------------------------------------------------------------------------------------------------------------------------------------------------------|
| 1 | <i>camelopardalis</i> _BaNP4_1 | 56       | BaNP4_1; CKGR01_1; ETH1_1; ETH2_1; ETH3_1; GNP01_1; GNP02_1; GNP03_1; GNP04_1; GNP05_1; MF01_1; MF02_1; MF03_1; MF04_1; MF05_1; MF07_1; MF11_1; MF13_1; MF14_1; MF15_1; MF16_1; MF17_1; MF24_1; RET1_1; RET3_1; RET4_1; RET5_1; RET6_1; RETRot1_1; RETRot2_1; RETRot3_1; RETWil_1; RETWil2_1; ISC03_1; ISC04_1; ISC08_1; SNR1_1; SNR2_1; V30_1; WA026_1; WA036_1; WA117_1; WA606_1; WA609_1; WA612_1; WA614_1; WA619_1; WA621_1; WA622_1; WA623_1; WA700_1; WA705_1; WA707_1; WA708_1; WA720_1; ZNP01_1 |
| 2 | <i>rothschildi</i> _MF02_2     | 37       | MF02_2; MF04_2; MF07_2; MF15_2; MF17_2; BNP01_2; BNP02_2; BNP04_2; BNP09_2; BNP03_1; BNP05_2; BNP06_1; CNP03_1; ENP04_2; ENP07_2; ENP08_1; ENP09_2; ENP21_2; KKR01_1; KKR02_2; KKR03_1; KKR04_2; KKR07_2; KKR08_1; MF06_1; MF09_1; MGR01_1; MGR03_2; MGR04_1; MTNP01_2; MTNP02_2; MTNP03_2; V23_2; V24_2; V25_1; V36_2; V38_1                                                                                                                                                                           |
| 3 | <i>reticulata</i> _RET5_2      | 7        | RET5_2; RET6_2; RETRot1_2; RETRot2_2; RETWil_2; RETWil2_2; LWC01_1                                                                                                                                                                                                                                                                                                                                                                                                                                      |
| 4 | <i>angolensis</i> _ENP15_1     | 52       | ENP15_1; ENP18_1; ENP19_1; V37_1; BNP05_1; ENP04_1; ENP07_1; ENP09_1; ENP21_1; KKR02_1; KKR04_1; KKR07_1; MGR03_1; MTNP01_1; MTNP02_1; MTNP03_1; V23_1; CKGR02_1; CKGR03_1; CKGR05_1; ENP11_1; ENP12_1; ENP14_1; ENP17_1; ENP20_1; KKR05_1; LVNP18_1; LVNP19_1; LVNP20_1; LVNP21_1; LVNP22_1; LVNP23a_1; LVNP31_1; LVNP32_1; LVNP33_1; LVNP34_1; LVNP35_1; LVNP36_1; SGR01_1; SGR05_1; SGR06_1; SGR07_1; SGR12_1; SGR13_1; SGR14_1; SUN1_1; SUN2_1; SUN3_1; SUN4_1; V26_1; V28_1; V29_1                 |
| 5 | <i>giraffa</i> _BNP01_1        | 11       | BNP01_1; BNP02_1; BNP04_1; BNP09_1; CNP01_1; ENP15_2; ENP16_1; ENP18_2; ENP19_2; MGR05_2; V37_2                                                                                                                                                                                                                                                                                                                                                                                                         |
| 6 | <i>giraffa</i> _V30_2          | 9        | V30_2; V24_1; V26_2; V28_2; MGR02_2; SNNP_1; V27_1; V31_1; V39_1                                                                                                                                                                                                                                                                                                                                                                                                                                        |

**Table Aj.** Overview of the alleles comprised by the haplotypes shown in the haploweb of *RASSF4*. Groups of individuals sharing an exclusive allele pool [field for recombination: FFR] are highlighted by a grey box.

| n | Representative allele          | $\Sigma$ | Allele sharing information                                                                                                         |
|---|--------------------------------|----------|------------------------------------------------------------------------------------------------------------------------------------|
| 1 | <i>camelopardalis</i> _ETH1_1  | 14       | ETH1_1; LVNP18_1; LVNP19_1; LVNP20_1; LVNP21_1; LVNP22_1; LVNP23a_1; SGR01_2; SGR05_2; SGR06_2; SGR07_1; SGR12_2; SGR13_1; SGR14_1 |
| 2 | <i>reticulata</i> _RETRot1_2   | 6        | RETRot1_2; RETRot3_1; RETWil2_1; ISC03_1; ISC04_1; ISC08_1                                                                         |
| 3 | <i>reticulata</i> _RETRot2_2   | 3        | RETRot2_2; RETRot3_2; RETWil2_2                                                                                                    |
| 4 | <i>reticulata</i> _ISC04_2     | 2        | ISC04_2; ISC08_2                                                                                                                   |
| 5 | <i>reticulata</i> _RET4_1      | 2        | RET4_1; RETRot2_1                                                                                                                  |
| 6 | <i>thornicrofti</i> _LVNP23a_2 | 3        | LVNP23a_2; LVNP33_1; RET6_2                                                                                                        |

|    |                              |    |                                                                                                                                                                                                                                                                                                                                                                                                                                                                                                                                            |
|----|------------------------------|----|--------------------------------------------------------------------------------------------------------------------------------------------------------------------------------------------------------------------------------------------------------------------------------------------------------------------------------------------------------------------------------------------------------------------------------------------------------------------------------------------------------------------------------------------|
| 7  | <i>tippelskirchi_SGR01_1</i> | 2  | SGR01_1; SGR12_1                                                                                                                                                                                                                                                                                                                                                                                                                                                                                                                           |
| 8  | <i>camelopardalis_ETH3_2</i> | 3  | ETH3_2; MF02_1; MF06_1                                                                                                                                                                                                                                                                                                                                                                                                                                                                                                                     |
| 9  | <i>rothschildi_MF11_2</i>    | 2  | MF11_2; MF17_1                                                                                                                                                                                                                                                                                                                                                                                                                                                                                                                             |
| 10 | <i>thornicrofti_LVNP35_1</i> | 1  | LVNP35_1                                                                                                                                                                                                                                                                                                                                                                                                                                                                                                                                   |
| 11 | <i>thornicrofti_LVNP36_1</i> | 1  | LVNP36_1                                                                                                                                                                                                                                                                                                                                                                                                                                                                                                                                   |
| 12 | <i>rothschildi_MF04_2</i>    | 3  | MF04_2; MF05_2; MF07_2                                                                                                                                                                                                                                                                                                                                                                                                                                                                                                                     |
| 13 | <i>rothschildi_MF15_2</i>    | 2  | MF15_2; MF24_2                                                                                                                                                                                                                                                                                                                                                                                                                                                                                                                             |
| 14 | <i>camelopardalis_ETH2_1</i> | 15 | ETH2_1; MF01_1; MF03_1; MF04_1; MF05_1; MF07_1; MF09_1; MF13_1; MF14_1; MF15_1; MF16_1; MF24_1; WA619_1; WA621_1; WA622_1                                                                                                                                                                                                                                                                                                                                                                                                                  |
| 15 | <i>peralta_WA622_2</i>       | 2  | WA622_2; WA614_1                                                                                                                                                                                                                                                                                                                                                                                                                                                                                                                           |
| 16 | <i>peralta_WA700_1</i>       | 1  | WA700_1                                                                                                                                                                                                                                                                                                                                                                                                                                                                                                                                    |
| 17 | <i>peralta_WA720_1</i>       | 1  | WA720_1                                                                                                                                                                                                                                                                                                                                                                                                                                                                                                                                    |
| 18 | <i>antiquorum_GNP01_1</i>    | 4  | GNP01_1; GNP03_1; GNP04_1; SNR2_1                                                                                                                                                                                                                                                                                                                                                                                                                                                                                                          |
| 19 | <i>giraffa_BNP01_1</i>       | 61 | BNP01_1; BNP02_1; BNP03_1; BNP04_1; BNP05_1; BNP06_1; BNP09_1; CKGR01_1; CKGR02_1; CKGR03_1; CKGR05_1; CNP01_1; CNP02_1; CNP03_1; ENP04_1; ENP07_1; ENP08_1; ENP09_1; ENP11_1; ENP12_1; ENP14_1; ENP15_1; ENP16_1; ENP17_1; ENP18_1; ENP19_1; ENP20_1; ENP21_1; GNP02_1; KKR01_1; KKR02_1; KKR03_1; KKR04_1; KKR05_1; KKR07_1; KKR08_1; MGR03_1; MGR04_1; MGR05_1; MTNP01_1; MTNP02_1; MTNP03_1; RET1_1; SNNP_1; SUN1_1; SUN2_1; SUN3_1; SUN4_1; V23_1; V24_1; V25_1; V26_1; V27_1; V28_1; V29_1; V30_1; V31_1; V36_1; V37_1; V38_1; V39_1 |
| 20 | <i>angolensis_CKGR02_2</i>   | 13 | CKGR02_2; CNP01_2; GNP02_2; GNP05_1; SNR1_1; WA026_1; WA036_1; WA606_1; WA609_1; WA623_1; WA707_1; WA708_1; ZNP01_1                                                                                                                                                                                                                                                                                                                                                                                                                        |
| 21 | <i>thornicrofti_LVNP31_1</i> | 1  | LVNP31_1                                                                                                                                                                                                                                                                                                                                                                                                                                                                                                                                   |
| 22 | <i>thornicrofti_LVNP34_1</i> | 1  | LVNP34_1                                                                                                                                                                                                                                                                                                                                                                                                                                                                                                                                   |
| 23 | <i>tippelskirchi_SGR06_1</i> | 2  | SGR06_1; RETRot1_1                                                                                                                                                                                                                                                                                                                                                                                                                                                                                                                         |
| 24 | <i>reticulata_LWC01_1</i>    | 1  | LWC01_1                                                                                                                                                                                                                                                                                                                                                                                                                                                                                                                                    |
| 25 | <i>giraffa_MGR01_1</i>       | 2  | MGR01_1; MGR02_1                                                                                                                                                                                                                                                                                                                                                                                                                                                                                                                           |
| 26 | <i>giraffa_MGR01_2</i>       | 2  | MGR01_2; MGR02_2                                                                                                                                                                                                                                                                                                                                                                                                                                                                                                                           |

**Table Ak.** Overview of the alleles comprised by the haplotypes shown in the haploweb of *RFC5*. Groups of individuals sharing an exclusive allele pool [field for recombination: FFR] are highlighted by a grey box.

| n | Representative allele         | ∑  | Allele sharing information                                                                                                                                                                                                                                                                                                                                                                                       |
|---|-------------------------------|----|------------------------------------------------------------------------------------------------------------------------------------------------------------------------------------------------------------------------------------------------------------------------------------------------------------------------------------------------------------------------------------------------------------------|
| 1 | <i>camelopardalis_BaNP4_1</i> | 47 | BaNP4_1; ETH1_1; ETH2_1; ETH3_1; GNP01_1; GNP03_1; GNP04_1; GNP05_1; MF01_1; MF02_1; MF03_1; MF04_1; MF05_1; MF06_1; MF07_1; MF09_1; MF11_1; MF13_1; MF14_1; MF15_1; MF16_1; MF17_1; MF24_1; RET1_1; RET4_1; RET6_1; RETWil2_1; ISC04_1; LWC01_1; SNR1_1; SNR2_1; WA026_1; WA036_1; WA117_1; WA606_1; WA609_1; WA612_1; WA614_1; WA619_1; WA621_1; WA622_1; WA623_1; WA700_1; WA705_1; WA707_1; WA720_1; ZNP01_1 |
| 2 | <i>camelopardalis_BaNP4_2</i> | 2  | BaNP4_2; ETH2_2                                                                                                                                                                                                                                                                                                                                                                                                  |
| 3 | <i>antiquorum_GNP05_2</i>     | 3  | GNP05_2; ZNP01_2; GNP02_1                                                                                                                                                                                                                                                                                                                                                                                        |
| 4 | <i>peralta_WA036_2</i>        | 10 | WA036_2; WA117_2; WA609_2; WA612_2; WA621_2; WA622_2; WA700_2;                                                                                                                                                                                                                                                                                                                                                   |

|    |                               |    |                                                                                                                                                                                                                                                                                                                                                                                                                                                                     |
|----|-------------------------------|----|---------------------------------------------------------------------------------------------------------------------------------------------------------------------------------------------------------------------------------------------------------------------------------------------------------------------------------------------------------------------------------------------------------------------------------------------------------------------|
|    |                               |    | WA705_2; WA707_2; WA708_1                                                                                                                                                                                                                                                                                                                                                                                                                                           |
| 5  | <i>reticulata</i> _RET1_2     | 11 | RET1_2; RET4_2; RET6_2; RETWil2_2; ISC04_2; RET3_2; RET5_1; RETRot1_1; RETWil_2; ISC03_1; ISC08_2                                                                                                                                                                                                                                                                                                                                                                   |
| 6  | <i>reticulata</i> _RET3_1     | 3  | RET3_1; RETWil_1; ISC08_1                                                                                                                                                                                                                                                                                                                                                                                                                                           |
| 7  | <i>giraffa</i> _KKR05_1       | 1  | KKR05_1                                                                                                                                                                                                                                                                                                                                                                                                                                                             |
| 8  | <i>giraffa</i> _BNP01_1       | 53 | BNP01_1; BNP02_1; BNP03_1; BNP04_1; BNP05_1; BNP06_1; BNP09_1; CKGR01_1; CKGR02_1; CKGR03_1; CKGR05_1; CNP01_1; CNP02_1; CNP03_1; ENP04_2; ENP07_1; ENP09_1; ENP14_2; ENP16_1; ENP18_2; ENP19_1; KKR01_1; KKR02_1; KKR03_1; KKR04_1; KKR07_1; KKR08_1; MGR01_1; MGR02_1; MGR03_1; MGR04_1; MGR05_1; MTNP01_1; MTNP02_1; MTNP03_1; SNNP_1; SUN1_1; SUN2_1; SUN3_1; SUN4_1; V23_1; V24_1; V25_1; V26_1; V27_1; V28_1; V29_1; V30_1; V31_1; V36_1; V37_1; V38_1; V39_1 |
| 9  | <i>angolensis</i> _ENP08_1    | 2  | ENP08_1; ENP12_1                                                                                                                                                                                                                                                                                                                                                                                                                                                    |
| 10 | <i>angolensis</i> _ENP12_2    | 2  | ENP12_2; ENP15_2                                                                                                                                                                                                                                                                                                                                                                                                                                                    |
| 11 | <i>angolensis</i> _ENP14_1    | 6  | ENP14_1; ENP08_2; ENP11_1; ENP15_1; ENP20_1; ENP21_1                                                                                                                                                                                                                                                                                                                                                                                                                |
| 12 | <i>angolensis</i> _ENP18_1    | 2  | ENP18_1; ENP17_1                                                                                                                                                                                                                                                                                                                                                                                                                                                    |
| 13 | <i>thornicrofti</i> _LVNP18_1 | 19 | LVNP18_1; LVNP19_1; LVNP20_2; LVNP21_1; LVNP22_1; LVNP23a_1; LVNP31_1; LVNP32_1; LVNP33_2; LVNP34_1; LVNP35_1; LVNP36_1; SGR01_1; SGR05_1; SGR06_1; SGR07_1; SGR12_1; SGR13_1; SGR14_1                                                                                                                                                                                                                                                                              |
| 14 | <i>thornicrofti</i> _LVNP20_1 | 2  | LVNP20_1; LVNP33_1                                                                                                                                                                                                                                                                                                                                                                                                                                                  |

**Table A1.** Overview of the alleles comprised by the haplotypes shown in the haploweb of *SAP130*. Groups of individuals sharing an exclusive allele pool [field for recombination: FFR] are highlighted by a grey box.

| n | Representative allele          | ∑  | Allele sharing information                                                                                                                                                                                                                                                                                                                                                                                        |
|---|--------------------------------|----|-------------------------------------------------------------------------------------------------------------------------------------------------------------------------------------------------------------------------------------------------------------------------------------------------------------------------------------------------------------------------------------------------------------------|
| 1 | <i>camelopardalis</i> _BaNP4_1 | 47 | BaNP4_1; ETH1_1; ETH2_1; ETH3_1; GNP01_1; GNP02_1; GNP03_1; GNP04_1; GNP05_1; MF01_1; MF02_1; MF03_1; MF04_1; MF05_1; MF06_1; MF07_1; MF09_1; MF11_1; MF13_1; MF14_1; MF15_1; MF16_1; MF17_1; MF24_1; RET1_1; RET3_1; RET4_1; RETWil2_1; ISC03_1; LWC01_1; SNR1_1; WA026_1; WA036_1; WA117_1; WA606_1; WA609_1; WA612_1; WA614_1; WA619_1; WA622_1; WA623_1; WA700_1; WA705_1; WA707_1; WA708_1; WA720_1; ZNP01_1 |
| 2 | <i>peralta</i> _WA036_2        | 3  | WA036_2; WA612_2; WA622_2                                                                                                                                                                                                                                                                                                                                                                                         |
| 3 | <i>peralta</i> _WA606_2        | 2  | WA606_2; WA621_1                                                                                                                                                                                                                                                                                                                                                                                                  |
| 4 | <i>reticulata</i> _RET1_2      | 8  | RET1_2; RET6_2; RETRot1_2; RETRot2_1; RETRot3_2; RETWil_1; ISC04_1; ISC08_1                                                                                                                                                                                                                                                                                                                                       |
| 5 | <i>reticulata</i> _LWC01_2     | 5  | LWC01_2; RET6_1; RETRot1_1; RETRot3_1; RET5_2                                                                                                                                                                                                                                                                                                                                                                     |
| 6 | <i>antiquorum</i> _SNR2_1      | 1  | SNR2_1                                                                                                                                                                                                                                                                                                                                                                                                            |
| 7 | <i>tippelskirchi</i> _SGR05_1  | 15 | SGR05_1; SGR06_1; SGR14_1; LVNP18_1; LVNP19_1; LVNP20_1; LVNP21_1; LVNP22_1; LVNP23a_1; LVNP31_1; LVNP32_1; LVNP33_1; LVNP34_1; LVNP35_1; LVNP36_1                                                                                                                                                                                                                                                                |
| 8 | <i>giraffa</i> _BNP01_1        | 67 | BNP01_1; BNP02_1; BNP03_1; BNP04_1; BNP05_1; BNP06_1; BNP09_1; CKGR01_1; CKGR02_1; CKGR05_1; CNP01_1; CNP02_1; CNP03_1; ENP04_1; ENP07_1; ENP08_1; ENP09_1; ENP11_1; ENP12_1; ENP14_1; ENP15_1; ENP16_1; ENP17_1; ENP18_1; ENP19_1; ENP20_1; ENP21_1; KKR01_1; KKR02_1; KKR03_1; KKR04_1; KKR05_1; KKR07_1; KKR08_1; MGR01_1;                                                                                     |

|   |                             |   |                                                                                                                                                                                                                                                                    |
|---|-----------------------------|---|--------------------------------------------------------------------------------------------------------------------------------------------------------------------------------------------------------------------------------------------------------------------|
|   |                             |   | MGR02_1; MGR03_1; MGR04_1; MGR05_1; MTNP01_1; MTNP02_1; MTNP03_1; SGR01_1; SGR05_2; SGR06_2; SGR07_1; SGR12_1; SGR13_1; SGR14_2; SNNP_1; SUN1_1; SUN2_1; SUN3_1; SUN4_1; V23_1; V24_1; V25_1; V26_1; V27_1; V28_1; V29_1; V30_1; V31_1; V36_1; V37_1; V38_1; V39_1 |
| 9 | <i>angolensis</i> _CKGR03_1 | 1 | CKGR03_1                                                                                                                                                                                                                                                           |

**Table Am.** Overview of the alleles comprised by the haplotypes shown in the haploweb of *SOS1*. Groups of individuals sharing an exclusive allele pool [field for recombination: FFR] are highlighted by a grey box.

| n  | Representative allele          | $\Sigma$ | Allele sharing information                                                                                                                                                                                                                                                                                                                                                                                                                     |
|----|--------------------------------|----------|------------------------------------------------------------------------------------------------------------------------------------------------------------------------------------------------------------------------------------------------------------------------------------------------------------------------------------------------------------------------------------------------------------------------------------------------|
| 1  | <i>camelopardalis</i> _BaNP4_1 | 49       | BaNP4_1; ETH1_1; ETH2_1; ETH3_1; GNP01_1; GNP02_1; GNP03_1; GNP04_1; GNP05_1; MF01_1; MF02_1; MF03_1; MF04_1; MF05_1; MF06_1; MF07_1; MF09_1; MF11_1; MF13_1; MF15_1; MF16_1; MF17_1; MF24_1; RET1_1; RET3_1; RET4_1; RET5_1; RET6_1; RETRot1_1; RETRot2_1; RETRot3_1; RETWil_1; RETWil2_1; ISC04_1; ISC08_1; LWC01_1; SNR1_1; SNR2_1; WA026_1; WA036_1; WA621_1; WA622_1; WA623_1; WA700_1; WA705_1; WA707_1; WA708_1; WA720_1; ZNP01_1       |
| 2  | <i>rothschildi</i> _MF05_2     | 5        | MF05_2; MF07_2; ISC04_2; ISC08_2; LWC01_2                                                                                                                                                                                                                                                                                                                                                                                                      |
| 3  | <i>reticulata</i> _RET5_2      | 4        | RET5_2; RET6_2; RETRot1_2; RETWil_2                                                                                                                                                                                                                                                                                                                                                                                                            |
| 4  | <i>rothschildi</i> _MF14_1     | 1        | MF14_1                                                                                                                                                                                                                                                                                                                                                                                                                                         |
| 5  | <i>reticulata</i> _ISC03_1     | 1        | ISC03_1                                                                                                                                                                                                                                                                                                                                                                                                                                        |
| 6  | <i>thornicrofti</i> _LVNP32_1  | 1        | LVNP32_1                                                                                                                                                                                                                                                                                                                                                                                                                                       |
| 7  | <i>giraffa</i> _BNP01_1        | 20       | BNP01_1; BNP03_1; BNP04_1; BNP05_1; BNP06_1; BNP09_1; CKGR05_1; KKR01_1; KKR03_1; MGR01_1; MGR02_1; MGR04_1; MTNP01_1; MTNP02_1; MTNP03_1; V29_1; V31_1; V36_1; V37_1; V38_1                                                                                                                                                                                                                                                                   |
| 8  | <i>giraffa</i> _BNP03_2        | 51       | BNP03_2; BNP05_2; BNP06_2; MGR02_2; MTNP02_2; V29_2; V31_2; V36_2; V37_2; V38_2; BNP02_1; CKGR01_1; CKGR02_1; CKGR03_1; CNP01_1; CNP02_1; CNP03_1; ENP04_1; ENP07_1; ENP08_1; ENP09_1; ENP11_1; ENP12_1; ENP14_1; ENP15_1; ENP16_1; ENP17_1; ENP18_1; ENP19_1; ENP20_1; ENP21_1; KKR02_1; KKR04_1; KKR05_1; KKR07_1; KKR08_1; MGR03_2; MGR05_1; SNNP_1; SUN1_1; SUN2_1; SUN3_1; SUN4_1; V23_1; V24_1; V25_1; V26_1; V27_1; V28_1; V30_1; V39_2 |
| 9  | <i>giraffa</i> _KKR03_2        | 20       | KKR03_2; MGR03_1; LVNP18_1; LVNP19_1; LVNP20_1; LVNP21_1; LVNP22_1; LVNP23a_1; LVNP31_1; LVNP33_1; LVNP34_1; LVNP35_1; LVNP36_1; SGR01_1; SGR05_1; SGR06_1; SGR07_1; SGR12_1; SGR13_1; SGR14_1                                                                                                                                                                                                                                                 |
| 10 | <i>angolensis</i> _CKGR01_2    | 5        | CKGR01_2; CNP03_2; ENP16_2; V26_2; V39_1                                                                                                                                                                                                                                                                                                                                                                                                       |

**Table An.** Overview of the alleles comprised by the haplotypes shown in the haploweb of *UBN2*. Groups of individuals sharing an exclusive allele pool [field for recombination: FFR] are highlighted by a grey box.

| n | Representative allele          | $\Sigma$ | Allele sharing information                                                                                                                                                                                                                                                                                                                                                                 |
|---|--------------------------------|----------|--------------------------------------------------------------------------------------------------------------------------------------------------------------------------------------------------------------------------------------------------------------------------------------------------------------------------------------------------------------------------------------------|
| 1 | <i>camelopardalis</i> _BaNP4_1 | 25       | BaNP4_1; ETH1_2; ETH2_1; ETH3_1; GNP01_1; GNP02_2; GNP04_1; GNP05_2; MF03_2; MF11_1; MF15_1; MF16_1; MTNP03_1; RET1_1; RET3_2; RET5_1; RET6_1; RETRot3_1; SNNP_2; SNR1_1; SNR2_1; WA036_1; WA612_2; WA614_2; ZNP01_1                                                                                                                                                                       |
| 2 | <i>camelopardalis</i> _ETH1_1  | 35       | ETH1_1; ETH2_2; ETH3_2; GNP02_1; GNP05_1; MF03_1; MF15_2; RET3_1; RETRot3_2; SNNP_1; WA612_1; WA614_1; GNP03_1; MF01_2; MF02_1; MF04_1; MF05_2; MF06_1; MF07_2; MF09_1; MF13_1; MF14_1; MF17_1; MF24_1; RETWil_1; WA026_1; WA117_1; WA606_1; WA609_1; WA619_1; WA621_1; WA622_1; WA623_1; WA700_1; WA705_1                                                                                 |
| 3 | <i>rothschildi</i> _MF01_1     | 3        | MF01_1; MF05_1; MF07_1                                                                                                                                                                                                                                                                                                                                                                     |
| 4 | <i>reticulata</i> _RET4_1      | 8        | RET4_1; RETRot1_1; RETRot2_1; RETWil2_1; ISC03_1; ISC04_1; ISC08_1; LWC01_1                                                                                                                                                                                                                                                                                                                |
| 5 | <i>peralta</i> _WA707_1        | 1        | WA707_1                                                                                                                                                                                                                                                                                                                                                                                    |
| 6 | <i>peralta</i> _WA720_1        | 1        | WA720_1                                                                                                                                                                                                                                                                                                                                                                                    |
| 7 | <i>giraffa</i> _BNP01_1        | 43       | BNP01_1; BNP03_1; BNP04_1; BNP06_1; BNP09_1; CKGR01_1; CKGR02_1; CKGR03_1; CKGR05_1; CNP03_1; ENP04_1; ENP07_1; ENP08_1; ENP09_1; ENP11_1; ENP12_1; ENP14_1; ENP15_1; ENP16_1; ENP17_1; ENP18_1; ENP19_1; ENP20_1; ENP21_1; KKR01_1; KKR02_1; KKR03_1; KKR04_1; KKR05_1; KKR07_1; KKR08_1; MGR01_1; MGR03_1; MTNP01_1; MTNP02_1; SUN1_1; SUN3_1; SUN4_1; V24_1; V25_1; V28_1; V36_1; V37_1 |
| 8 | <i>giraffa</i> _BNP03_2        | 30       | BNP03_2; BNP06_2; CKGR03_2; ENP04_2; ENP08_2; ENP11_2; ENP14_2; ENP20_2; MGR03_2; SUN1_2; SUN4_2; V24_2; V36_2; V37_2; BNP02_2; BNP05_1; CNP01_1; CNP02_1; MGR02_1; MGR04_1; MGR05_1; SUN2_1; V23_1; V26_1; V27_1; V29_1; V30_1; V31_1; V38_1; V39_1                                                                                                                                       |
| 9 | <i>thornicrofti</i> _LVNP18_1  | 19       | LVNP18_1; LVNP19_1; LVNP20_1; LVNP21_1; LVNP22_1; LVNP23a_1; LVNP31_1; LVNP32_1; LVNP33_1; LVNP34_1; LVNP35_1; LVNP36_1; SGR01_1; SGR05_1; SGR06_1; SGR07_1; SGR12_1; SGR13_1; SGR14_2                                                                                                                                                                                                     |

**Table Ao.** Overview of the alleles comprised by the haplotypes shown in the haploweb of *USP33*. Groups of individuals sharing an exclusive allele pool [field for recombination: FFR] are highlighted by a grey box.

| n | Representative allele         | $\Sigma$ | Allele sharing information                                                                                                                                                                                                                         |
|---|-------------------------------|----------|----------------------------------------------------------------------------------------------------------------------------------------------------------------------------------------------------------------------------------------------------|
| 1 | <i>camelopardalis</i> _ETH1_1 | 29       | ETH1_1; ETH2_1; ETH3_1; GNP02_1; GNP04_1; MF02_1; MF03_1; MF04_1; MF05_1; MF06_1; MF11_1; MF13_1; MF14_1; MF16_1; MF17_1; MF24_1; RET4_1; RET5_1; RET6_1; RETWil2_1; ISC04_1; LWC01_1; SNR1_1; SNR2_1; WA036_1; WA606_1; WA612_1; WA621_1; ZNP01_1 |
| 2 | <i>camelopardalis</i> _ETH1_2 | 20       | ETH1_2; ETH2_2; GNP02_2; GNP04_2; MF06_2; MF11_2; MF13_2; MF16_2; WA612_2; GNP01_1; GNP03_1; GNP05_1; RET3_2; RETRot1_2; WA026_2; WA117_2; WA622_2; WA623_2; WA705_2; WA707_1                                                                      |



|    |                              |    |                                                                                                                                                                                                                                                                                                                                                                                                                                                                                              |
|----|------------------------------|----|----------------------------------------------------------------------------------------------------------------------------------------------------------------------------------------------------------------------------------------------------------------------------------------------------------------------------------------------------------------------------------------------------------------------------------------------------------------------------------------------|
| 3  | <i>camelopardalis_ETH3_2</i> | 13 | ETH3_2; RETWil2_2; WA036_2; RET3_1; RETRot1_1; WA622_1; WA623_1; MF01_1; RETRot2_1; RETWil_1; ISC03_1; ISC08_1; WA614_1                                                                                                                                                                                                                                                                                                                                                                      |
| 4  | <i>rothschildi_MF03_2</i>    | 8  | MF03_2; MF05_2; MF14_2; MF17_2; MF01_2; MF07_1; MF09_1; MF15_1                                                                                                                                                                                                                                                                                                                                                                                                                               |
| 5  | <i>reticulata_RET4_2</i>     | 4  | RET4_2; RET6_2; RETWil_2; ISC03_2                                                                                                                                                                                                                                                                                                                                                                                                                                                            |
| 6  | <i>reticulata_ISC04_2</i>    | 5  | ISC04_2; LWC01_2; RETRot2_2; RET1_1; RETRot3_2                                                                                                                                                                                                                                                                                                                                                                                                                                               |
| 7  | <i>peralta_WA117_1</i>       | 6  | WA117_1; WA705_1; WA619_1; WA700_1; WA708_1; WA720_1                                                                                                                                                                                                                                                                                                                                                                                                                                         |
| 8  | <i>peralta_WA614_2</i>       | 3  | WA614_2; WA708_2; WA720_2                                                                                                                                                                                                                                                                                                                                                                                                                                                                    |
| 9  | <i>peralta_WA621_2</i>       | 4  | WA621_2; WA619_2; WA700_2; WA609_1                                                                                                                                                                                                                                                                                                                                                                                                                                                           |
| 10 | <i>thornicrofti_LVNP18_1</i> | 19 | LVNP18_1; LVNP19_1; LVNP20_1; LVNP21_1; LVNP22_1; LVNP23a_1; LVNP31_1; LVNP32_1; LVNP33_1; LVNP34_1; LVNP35_1; LVNP36_1; SGR01_1; SGR05_1; SGR06_1; SGR07_1; SGR12_1; SGR13_1; SGR14_1                                                                                                                                                                                                                                                                                                       |
| 11 | <i>giraffa_BNP01_1</i>       | 56 | BNP01_1; BNP02_1; BNP03_1; BNP04_1; BNP05_1; BNP06_1; BNP09_1; CKGR03_1; CKGR05_1; CNP01_1; CNP02_1; CNP03_1; ENP04_1; ENP07_1; ENP09_1; ENP11_1; ENP12_1; ENP14_1; ENP17_1; ENP18_1; ENP19_1; ENP20_1; ENP21_1; KKR01_1; KKR02_1; KKR03_1; KKR04_1; KKR05_1; KKR07_1; KKR08_1; MGR01_1; MGR02_1; MGR03_1; MGR04_1; MGR05_1; MTNP01_1; MTNP02_1; MTNP03_1; SNNP_1; SUN1_1; SUN2_1; SUN3_1; SUN4_1; V23_1; V24_1; V25_1; V26_1; V27_1; V28_1; V29_1; V30_1; V31_1; V36_1; V37_1; V38_1; V39_1 |
| 12 | <i>angolensis_CKGR05_2</i>   | 13 | CKGR05_2; CNP03_2; ENP07_2; ENP09_2; ENP14_2; ENP17_2; ENP19_2; V29_2; CKGR01_1; CKGR02_1; ENP08_1; ENP15_1; ENP16_1                                                                                                                                                                                                                                                                                                                                                                         |

**Table Ap.** Overview of the alleles comprised by the haplotypes shown in the haploweb of *USP54*. Groups of individuals sharing an exclusive allele pool [field for recombination: FFR] are highlighted by a grey box.

| n | Representative allele         | $\Sigma$ | Allele sharing information                                                                                                                                                                                                                                                                                                           |
|---|-------------------------------|----------|--------------------------------------------------------------------------------------------------------------------------------------------------------------------------------------------------------------------------------------------------------------------------------------------------------------------------------------|
| 1 | <i>camelopardalis_BaNP4_1</i> | 26       | BaNP4_1; ETH1_1; ETH2_1; GNP05_1; MF01_1; MF02_1; MF03_1; MF05_1; MF06_1; MF07_1; MF09_1; MF11_1; MF13_1; MF14_1; MF15_1; MF16_1; MF17_1; MF24_1; RETRot2_1; SNR1_1; SNR2_1; WA026_1; WA036_1; WA606_1; WA700_1; WA720_1                                                                                                             |
| 2 | <i>camelopardalis_BaNP4_2</i> | 25       | BaNP4_2; ETH1_2; ETH2_2; GNP05_2; MF01_2; MF06_2; MF07_2; MF11_2; MF13_2; MF14_2; SNR1_2; SNR2_2; GNP01_1; GNP02_1; GNP03_1; GNP04_1; MF04_1; WA612_1; WA614_1; WA621_1; WA622_1; WA623_1; WA705_1; WA708_1; ZNP01_2                                                                                                                 |
| 3 | <i>peralta_WA036_2</i>        | 14       | WA036_2; WA700_2; WA720_2; WA612_2; WA614_2; WA621_2; WA622_2; WA623_2; WA705_2; LWC01_1; WA117_1; WA609_1; WA619_1; WA707_1                                                                                                                                                                                                         |
| 4 | <i>reticulata_RET1_1</i>      | 8        | RET1_1; RET4_1; RET5_1; RET6_1; RETRot1_1; RETRot3_1; RETWil_1; RETWil2_1                                                                                                                                                                                                                                                            |
| 5 | <i>reticulata_ISC03_1</i>     | 3        | ISC03_1; ISC04_1; ISC08_1                                                                                                                                                                                                                                                                                                            |
| 6 | <i>giraffa_BNP01_1</i>        | 38       | BNP01_1; BNP02_1; BNP03_1; BNP04_1; BNP05_1; BNP06_1; BNP09_1; CKGR01_1; CKGR02_1; CKGR03_1; CKGR05_2; CNP01_2; CNP02_2; CNP03_2; ENP09_2; ENP12_1; ENP14_1; ENP15_2; ENP20_2; ENP21_2; KKR02_1; KKR03_2; KKR05_2; KKR07_2; KKR08_1; MGR04_2; MTNP02_1; SNNP_1; V23_2; V24_1; V25_1; V26_2; V27_2; V28_2; V31_2; V36_1; V37_2; V39_2 |

|    |                               |    |                                                                                                                                                                                                                                                                                                                                                                                         |
|----|-------------------------------|----|-----------------------------------------------------------------------------------------------------------------------------------------------------------------------------------------------------------------------------------------------------------------------------------------------------------------------------------------------------------------------------------------|
| 7  | <i>angolensis</i> _CKGR05_1   | 44 | CKGR05_1; CNP01_1; CNP02_1; CNP03_1; ENP09_1; ENP15_1; ENP20_1; ENP21_1; KKR03_1; KKR05_1; KKR07_1; MGR04_1; V23_1; V26_1; V27_1; V28_1; V31_1; V37_1; V39_1; ENP04_1; ENP07_1; ENP08_1; ENP11_1; ENP16_1; ENP17_1; ENP18_1; ENP19_1; KKR01_1; KKR04_1; LVNP31_1; LVNP34_1; MGR01_1; MGR02_1; MGR03_1; MGR05_1; MTNP01_1; MTNP03_1; SUN1_1; SUN2_1; SUN3_1; SUN4_1; V29_1; V30_1; V38_1 |
| 8  | <i>tippelskirchi</i> _SGR07_1 | 2  | SGR07_2; SGR12_1                                                                                                                                                                                                                                                                                                                                                                        |
| 9  | <i>thornicrofti</i> _LVNP21_1 | 13 | LVNP21_1; LVNP23a_1; LVNP32_1; LVNP36_1; LVNP19_1; LVNP22_1; LVNP33_1; LVNP35_1; SGR01_1; SGR06_1; SGR07_1; SGR13_1; SGR14_1                                                                                                                                                                                                                                                            |
| 10 | <i>thornicrofti</i> _LVNP31_2 | 7  | LVNP31_2; LVNP18_1; LVNP20_1; LVNP21_2; LVNP23a_2; LVNP32_2; LVNP36_2                                                                                                                                                                                                                                                                                                                   |
| 11 | <i>thornicrofti</i> _LVNP34_2 | 2  | LVNP34_2; SGR05_1                                                                                                                                                                                                                                                                                                                                                                       |
